# Supplementary material for: Genome-wide analysis shows that RNase G plays a global role in the stability of mRNAs in Stenotrophomonas maltophilia
Source: PubMed Central journal article supplement (PMC5700063; doi:10.1038/s41598-017-16091-0), 2017-11-22
Supplement: 41598_2017_16091_MOESM1_ESM.pdf [file 41598_2017_16091_MOESM1_ESM.pdf]

**Genome-wide analysis shows that RNase G plays a global role in the stability of mRNAs in *Stenotrophomonas maltophilia*.**

Alejandra Bernardini\*, José L. Martínez\*\*

**Table S1. Level of expression and half-lives of RNAs from *S. maltophilia* D457 and ALB001**

| Name  | Synonym  | Gene length<br>(nt) | GC%   | D457                                                 |                    | ALB001                                               |                    | Half-life ratio<br>ALB001/D457 |
|-------|----------|---------------------|-------|------------------------------------------------------|--------------------|------------------------------------------------------|--------------------|--------------------------------|
|       |          |                     |       | Expression<br>mid-<br>exponential<br>phase<br>(RPKM) | Half-life<br>(min) | Expression<br>mid-<br>exponential<br>phase<br>(RPKM) | Half-life<br>(min) |                                |
| -     | SMD_2568 | 225                 | 63,56 | 28                                                   | 6,66               | 32                                                   | 30,29              | 4,55                           |
| -     | SMD_3891 | 210                 | 66,67 | 229                                                  | 1,38               | 289                                                  | 4,98               | 3,61                           |
| -     | SMD_0469 | 882                 | 70,41 | 14                                                   | 1,69               | 15                                                   | 5,06               | 3,00                           |
| -     | SMD_3942 | 249                 | 63,05 | 92                                                   | 1,31               | 66                                                   | 3,78               | 2,89                           |
| -     | SMD_3757 | 366                 | 68,58 | 11                                                   | 6,31               | 11                                                   | 16,66              | 2,64                           |
| -     | SMD_3804 | 258                 | 67,83 | 14                                                   | 1,77               | 11                                                   | 4,64               | 2,62                           |
| -     | SMD_2709 | 393                 | 65,39 | 53                                                   | 1,35               | 56                                                   | 3,48               | 2,58                           |
| -     | SMD_3475 | 429                 | 65,27 | 56                                                   | 1,08               | 59                                                   | 2,74               | 2,54                           |
| fkfP  | SMD_1637 | 435                 | 68,28 | 41                                                   | 1,59               | 31                                                   | 3,89               | 2,44                           |
| -     | SMD_3016 | 396                 | 66,92 | 11                                                   | 1,61               | 5                                                    | 3,92               | 2,44                           |
| -     | SMD_3748 | 408                 | 66,67 | 43                                                   | 1,41               | 36                                                   | 3,41               | 2,43                           |
| csrA  | SMD_1681 | 204                 | 58,82 | 617                                                  | 1,19               | 646                                                  | 2,89               | 2,42                           |
| -     | SMD_2350 | 558                 | 69,35 | 85                                                   | 1,65               | 82                                                   | 3,86               | 2,34                           |
| dut   | SMD_0322 | 474                 | 69,20 | 132                                                  | 1,41               | 131                                                  | 3,27               | 2,32                           |
| phaF  | SMD_3918 | 285                 | 63,16 | 61                                                   | 1,41               | 65                                                   | 3,22               | 2,28                           |
| -     | SMD_3761 | 264                 | 61,36 | 36                                                   | 1,31               | 43                                                   | 2,98               | 2,27                           |
| -     | SMD_2009 | 783                 | 66,92 | 87                                                   | 1,31               | 86                                                   | 2,96               | 2,26                           |
| -     | SMD_1667 | 306                 | 66,99 | 249                                                  | 1,35               | 257                                                  | 3,01               | 2,23                           |
| -     | SMD_1591 | 246                 | 64,23 | 31                                                   | 2,42               | 51                                                   | 5,35               | 2,22                           |
| -     | SMD_0264 | 285                 | 70,53 | 135                                                  | 2,72               | 111                                                  | 6,02               | 2,21                           |
| -     | SMD_1993 | 249                 | 69,08 | 151                                                  | 1,25               | 119                                                  | 2,73               | 2,19                           |
| -     | SMD_2229 | 831                 | 69,68 | 13                                                   | 1,19               | 13                                                   | 2,61               | 2,19                           |
| -     | SMD_1260 | 684                 | 70,76 | 54                                                   | 1,68               | 45                                                   | 3,65               | 2,18                           |
| -     | SMD_2678 | 600                 | 72,17 | 27                                                   | 1,70               | 32                                                   | 3,69               | 2,17                           |
| -     | SMD_1499 | 303                 | 65,02 | 27                                                   | 1,45               | 25                                                   | 3,13               | 2,17                           |
| xpsG  | SMD_0582 | 444                 | 68,24 | 57                                                   | 1,54               | 55                                                   | 3,32               | 2,16                           |
| -     | SMD_4007 | 471                 | 70,70 | 23                                                   | 1,48               | 16                                                   | 3,14               | 2,12                           |
| -     | SMD_2991 | 681                 | 68,14 | 59                                                   | 1,51               | 55                                                   | 3,17               | 2,10                           |
| copC  | SMD_1486 | 387                 | 62,79 | 42                                                   | 5,70               | 37                                                   | 11,90              | 2,09                           |
| DPM1  | SMD_4143 | 723                 | 68,19 | 117                                                  | 3,56               | 125                                                  | 7,41               | 2,08                           |
| -     | SMD_0394 | 411                 | 70,56 | 13                                                   | 2,50               | 22                                                   | 5,18               | 2,07                           |
| -     | SMD_1978 | 300                 | 72,67 | 138                                                  | 1,44               | 141                                                  | 2,97               | 2,06                           |
| cirA  | SMD_3723 | 2046                | 66,23 | 13                                                   | 3,06               | 13                                                   | 6,26               | 2,05                           |
| -     | SMD_1310 | 357                 | 64,71 | 92                                                   | 1,64               | 72                                                   | 3,35               | 2,04                           |
| -     | SMD_0560 | 600                 | 66,00 | 54                                                   | 5,83               | 79                                                   | 11,90              | 2,04                           |
| -     | SMD_0238 | 357                 | 63,03 | 34                                                   | 1,65               | 13                                                   | 3,37               | 2,04                           |
| -     | SMD_1670 | 186                 | 66,67 | 61                                                   | 1,30               | 79                                                   | 2,65               | 2,04                           |
| -     | SMD_1828 | 390                 | 68,72 | 42                                                   | 2,60               | 67                                                   | 5,27               | 2,03                           |
| -     | SMD_0418 | 927                 | 66,99 | 35                                                   | 1,56               | 26                                                   | 3,17               | 2,03                           |
| -     | SMD_2542 | 885                 | 67,68 | 82                                                   | 1,25               | 117                                                  | 2,52               | 2,02                           |
| -     | SMD_3430 | 645                 | 70,39 | 26                                                   | 2,94               | 25                                                   | 5,91               | 2,01                           |
| -     | SMD_2560 | 1008                | 68,45 | 5                                                    | 5,54               | 4                                                    | 11,09              | 2,00                           |
| cheW  | SMD_2033 | 492                 | 65,04 | 142                                                  | 1,27               | 73                                                   | 2,55               | 2,00                           |
| -     | SMD_2876 | 564                 | 68,97 | 298                                                  | 4,42               | 284                                                  | 8,79               | 1,99                           |
| -     | SMD_3192 | 1410                | 67,66 | 23                                                   | 2,08               | 18                                                   | 4,13               | 1,98                           |
| -     | SMD_0284 | 297                 | 72,39 | 33                                                   | 1,99               | 49                                                   | 3,91               | 1,97                           |
| cdsA2 | SMD_3841 | 996                 | 65,36 | 48                                                   | 2,28               | 35                                                   | 4,47               | 1,96                           |
| -     | SMD_1460 | 768                 | 68,10 | 25                                                   | 2,55               | 34                                                   | 4,99               | 1,96                           |
| -     | SMD_1022 | 396                 | 71,46 | 75                                                   | 3,65               | 86                                                   | 7,11               | 1,95                           |
| folK  | SMD_1715 | 486                 | 69,96 | 92                                                   | 1,52               | 96                                                   | 2,96               | 1,95                           |
| -     | SMD_0163 | 771                 | 68,09 | 44                                                   | 3,21               | 31                                                   | 6,25               | 1,95                           |
| -     | SMD_4058 | 747                 | 66,93 | 29                                                   | 1,77               | 18                                                   | 3,42               | 1,93                           |
| -     | SMD_4098 | 426                 | 62,44 | 83                                                   | 1,27               | 56                                                   | 2,45               | 1,93                           |
| -     | SMD_0521 | 1419                | 69,20 | 9                                                    | 2,85               | 9                                                    | 5,49               | 1,93                           |
| -     | SMD_2273 | 414                 | 68,84 | 14                                                   | 1,94               | 17                                                   | 3,74               | 1,92                           |
| -     | SMD_1868 | 924                 | 68,40 | 7                                                    | 1,62               | 7                                                    | 3,09               | 1,91                           |
| ptpS  | SMD_0514 | 363                 | 65,29 | 152                                                  | 2,28               | 147                                                  | 4,33               | 1,90                           |
| -     | SMD_0129 | 375                 | 69,60 | 14                                                   | 2,53               | 17                                                   | 4,77               | 1,89                           |

|       |          |      |       |     |      |     |      |      |
|-------|----------|------|-------|-----|------|-----|------|------|
| -     | SMD_1697 | 702  | 64,81 | 6   | 1,58 | 22  | 2,96 | 1,88 |
| -     | SMD_1889 | 468  | 67,74 | 19  | 1,44 | 18  | 2,70 | 1,87 |
| -     | SMD_2494 | 852  | 71,71 | 27  | 1,90 | 26  | 3,54 | 1,87 |
| -     | SMD_3197 | 573  | 68,06 | 29  | 2,30 | 43  | 4,30 | 1,87 |
| -     | SMD_3102 | 1593 | 67,73 | 34  | 2,99 | 27  | 5,57 | 1,87 |
| cheY2 | SMD_2045 | 393  | 61,58 | 253 | 1,31 | 151 | 2,44 | 1,86 |
| -     | SMD_2645 | 480  | 67,29 | 29  | 3,10 | 36  | 5,77 | 1,86 |
| -     | SMD_3913 | 486  | 64,61 | 51  | 2,67 | 68  | 4,95 | 1,85 |
| -     | SMD_2102 | 462  | 72,29 | 219 | 1,44 | 174 | 2,66 | 1,85 |
| arsR  | SMD_0133 | 330  | 66,97 | 16  | 3,15 | 18  | 5,77 | 1,83 |
| -     | SMD_1707 | 480  | 63,33 | 148 | 1,51 | 182 | 2,75 | 1,83 |
| -     | SMD_1459 | 285  | 68,77 | 27  | 3,55 | 26  | 6,49 | 1,83 |
| -     | SMD_2597 | 291  | 62,89 | 35  | 3,32 | 32  | 6,05 | 1,82 |
| -     | SMD_0448 | 408  | 66,67 | 41  | 1,46 | 35  | 2,66 | 1,82 |
| -     | SMD_3114 | 270  | 61,48 | 71  | 1,39 | 83  | 2,53 | 1,82 |
| -     | SMD_0999 | 675  | 70,37 | 29  | 2,23 | 35  | 4,04 | 1,81 |
| -     | SMD_2935 | 333  | 65,17 | 93  | 2,75 | 71  | 4,97 | 1,81 |
| -     | SMD_3558 | 780  | 71,03 | 54  | 2,95 | 57  | 5,28 | 1,79 |
| -     | SMD_4092 | 456  | 67,32 | 84  | 1,31 | 73  | 2,33 | 1,79 |
| -     | SMD_1874 | 765  | 66,27 | 17  | 2,24 | 16  | 3,98 | 1,78 |
| -     | SMD_1291 | 546  | 70,88 | 58  | 1,51 | 34  | 2,68 | 1,78 |
| hslO  | SMD_3211 | 894  | 69,91 | 51  | 2,18 | 82  | 3,83 | 1,75 |
| -     | SMD_2750 | 288  | 62,15 | 33  | 1,36 | 35  | 2,38 | 1,75 |
| exbD5 | SMD_3602 | 408  | 66,42 | 55  | 2,96 | 61  | 5,18 | 1,75 |
| nagA2 | SMD_4005 | 1116 | 71,42 | 21  | 2,27 | 29  | 3,97 | 1,75 |
| -     | SMD_2747 | 657  | 65,45 | 85  | 2,40 | 68  | 4,20 | 1,75 |
| -     | SMD_1169 | 597  | 66,00 | 354 | 2,26 | 368 | 3,95 | 1,75 |
| -     | SMD_3137 | 852  | 67,37 | 19  | 2,74 | 39  | 4,78 | 1,74 |
| -     | SMD_4233 | 771  | 70,56 | 19  | 3,82 | 13  | 6,66 | 1,74 |
| -     | SMD_0696 | 615  | 69,11 | 43  | 2,21 | 36  | 3,84 | 1,74 |
| -     | SMD_2929 | 327  | 61,16 | 14  | 1,54 | 4   | 2,66 | 1,73 |
| -     | SMD_3098 | 267  | 69,29 | 39  | 1,36 | 53  | 2,36 | 1,73 |
| -     | SMD_0060 | 828  | 69,93 | 74  | 2,14 | 112 | 3,70 | 1,73 |
| -     | SMD_0671 | 1068 | 69,10 | 29  | 2,29 | 29  | 3,95 | 1,73 |
| kdpE  | SMD_0324 | 687  | 66,96 | 31  | 3,48 | 41  | 6,01 | 1,72 |
| -     | SMD_1272 | 546  | 67,58 | 253 | 2,52 | 335 | 4,33 | 1,72 |
| agp   | SMD_1307 | 1269 | 67,06 | 24  | 2,71 | 24  | 4,65 | 1,71 |
| -     | SMD_1295 | 165  | 57,58 | 375 | 2,64 | 276 | 4,48 | 1,70 |
| -     | SMD_3929 | 876  | 66,10 | 52  | 2,81 | 46  | 4,76 | 1,69 |
| -     | SMD_4214 | 525  | 66,67 | 167 | 2,43 | 171 | 4,10 | 1,69 |
| -     | SMD_1406 | 1563 | 64,43 | 36  | 1,87 | 39  | 3,15 | 1,69 |
| -     | SMD_1469 | 489  | 69,33 | 39  | 1,38 | 51  | 2,32 | 1,69 |
| -     | SMD_3715 | 972  | 68,21 | 119 | 2,84 | 163 | 4,79 | 1,68 |
| -     | SMD_1302 | 948  | 68,25 | 65  | 4,02 | 67  | 6,74 | 1,68 |
| tyrA  | SMD_1799 | 1125 | 68,62 | 58  | 1,38 | 72  | 2,30 | 1,66 |
| glnE  | SMD_0399 | 2514 | 70,60 | 32  | 2,80 | 41  | 4,63 | 1,66 |
| -     | SMD_1055 | 270  | 67,41 | 118 | 1,49 | 121 | 2,46 | 1,65 |
| qnrR  | SMD_0997 | 777  | 71,56 | 15  | 1,64 | 35  | 2,70 | 1,65 |
| -     | SMD_1298 | 1629 | 70,84 | 19  | 2,87 | 12  | 4,71 | 1,64 |
| -     | SMD_4085 | 336  | 68,45 | 14  | 3,70 | 23  | 6,04 | 1,64 |
| ubiA  | SMD_3995 | 894  | 68,57 | 78  | 2,79 | 62  | 4,56 | 1,63 |
| -     | SMD_0294 | 603  | 69,32 | 18  | 2,35 | 17  | 3,82 | 1,63 |
| -     | SMD_1184 | 510  | 71,18 | 56  | 2,68 | 64  | 4,35 | 1,63 |
| -     | SMD_1059 | 732  | 68,44 | 39  | 1,80 | 37  | 2,93 | 1,62 |
| -     | SMD_3649 | 732  | 67,76 | 96  | 2,10 | 118 | 3,40 | 1,62 |
| -     | SMD_1641 | 498  | 63,86 | 36  | 2,72 | 37  | 4,42 | 1,62 |
| -     | SMD_3556 | 618  | 70,23 | 74  | 2,85 | 114 | 4,61 | 1,62 |
| -     | SMD_3707 | 819  | 63,13 | 22  | 3,63 | 37  | 5,88 | 1,62 |
| l     | SMD_3284 | 558  | 67,92 | 45  | 3,37 | 41  | 5,46 | 1,62 |
| -     | SMD_4073 | 858  | 67,37 | 51  | 3,03 | 41  | 4,90 | 1,62 |
| rimP  | SMD_2964 | 591  | 66,33 | 479 | 2,42 | 414 | 3,92 | 1,62 |
| -     | SMD_2688 | 729  | 67,22 | 31  | 2,78 | 34  | 4,49 | 1,61 |
| -     | SMD_0044 | 570  | 66,49 | 21  | 3,24 | 29  | 5,22 | 1,61 |
| recF  | SMD_0003 | 1095 | 66,48 | 54  | 2,89 | 68  | 4,65 | 1,61 |
| -     | SMD_3545 | 651  | 69,28 | 69  | 2,73 | 49  | 4,39 | 1,61 |

|      |          |      |       |     |      |     |      |      |
|------|----------|------|-------|-----|------|-----|------|------|
| -    | SMD_3675 | 897  | 69,23 | 48  | 3,55 | 53  | 5,69 | 1,61 |
| ispG | SMD_1722 | 1152 | 65,19 | 259 | 2,33 | 242 | 3,74 | 1,60 |
| -    | SMD_1806 | 594  | 64,98 | 91  | 3,45 | 71  | 5,52 | 1,60 |
| -    | SMD_3762 | 1215 | 62,55 | 87  | 3,77 | 121 | 6,04 | 1,60 |
| -    | SMD_3564 | 1263 | 71,65 | 13  | 1,84 | 12  | 2,95 | 1,60 |
| -    | SMD_2480 | 2160 | 67,27 | 62  | 2,24 | 77  | 3,58 | 1,60 |
| -    | SMD_2038 | 309  | 66,67 | 181 | 1,37 | 83  | 2,18 | 1,60 |
| -    | SMD_1308 | 984  | 68,09 | 5   | 2,30 | 4   | 3,67 | 1,59 |
| -    | SMD_1241 | 369  | 67,48 | 44  | 2,66 | 31  | 4,25 | 1,59 |
| -    | SMD_4065 | 792  | 63,89 | 139 | 2,59 | 111 | 4,12 | 1,59 |
| -    | SMD_0388 | 1449 | 68,88 | 21  | 2,59 | 35  | 4,12 | 1,59 |
| xpsJ | SMD_0585 | 633  | 71,25 | 18  | 2,27 | 21  | 3,61 | 1,59 |
| -    | SMD_3092 | 183  | 65,57 | 113 | 3,68 | 111 | 5,83 | 1,58 |
| -    | SMD_1990 | 789  | 71,61 | 44  | 1,44 | 53  | 2,28 | 1,58 |
| kdtA | SMD_3533 | 1299 | 69,05 | 41  | 3,15 | 48  | 4,96 | 1,58 |
| nudC | SMD_3883 | 906  | 68,76 | 118 | 2,76 | 139 | 4,34 | 1,57 |
| fliG | SMD_2063 | 978  | 66,26 | 99  | 1,23 | 67  | 1,94 | 1,57 |
| -    | SMD_2820 | 417  | 69,54 | 121 | 2,26 | 114 | 3,54 | 1,57 |
| -    | SMD_1639 | 768  | 66,93 | 113 | 3,20 | 132 | 5,01 | 1,57 |
| fliF | SMD_2064 | 1647 | 68,73 | 64  | 1,41 | 44  | 2,21 | 1,57 |
| -    | SMD_0672 | 828  | 66,18 | 51  | 2,71 | 61  | 4,23 | 1,56 |
| -    | SMD_2674 | 993  | 68,78 | 88  | 2,65 | 111 | 4,14 | 1,56 |
| -    | SMD_0633 | 480  | 64,79 | 71  | 5,60 | 71  | 8,75 | 1,56 |
| -    | SMD_1917 | 285  | 69,12 | 89  | 3,19 | 91  | 4,97 | 1,56 |
| -    | SMD_1082 | 597  | 69,18 | 47  | 3,66 | 61  | 5,71 | 1,56 |
| -    | SMD_3415 | 306  | 59,80 | 57  | 3,69 | 92  | 5,75 | 1,56 |
| -    | SMD_3769 | 501  | 72,85 | 22  | 2,49 | 15  | 3,87 | 1,56 |
| -    | SMD_0089 | 579  | 70,98 | 35  | 3,86 | 23  | 6,01 | 1,56 |
| -    | SMD_0463 | 930  | 71,18 | 23  | 2,72 | 29  | 4,22 | 1,55 |
| -    | SMD_1923 | 894  | 65,32 | 27  | 2,65 | 33  | 4,09 | 1,55 |
| -    | SMD_1211 | 336  | 68,45 | 69  | 3,35 | 69  | 5,17 | 1,54 |
| -    | SMD_4213 | 750  | 67,33 | 118 | 2,57 | 93  | 3,95 | 1,54 |
| -    | SMD_0315 | 468  | 65,38 | 161 | 3,69 | 144 | 5,67 | 1,54 |
| flgE | SMD_2085 | 1224 | 63,73 | 135 | 2,62 | 116 | 4,02 | 1,54 |
| adi  | SMD_2577 | 2289 | 64,31 | 175 | 2,52 | 184 | 3,87 | 1,53 |
| -    | SMD_1053 | 711  | 67,23 | 56  | 1,82 | 51  | 2,79 | 1,53 |
| -    | SMD_1443 | 321  | 62,93 | 181 | 3,01 | 182 | 4,60 | 1,53 |
| -    | SMD_0260 | 375  | 69,33 | 356 | 2,90 | 334 | 4,44 | 1,53 |
| aroQ | SMD_3832 | 450  | 68,67 | 191 | 2,54 | 178 | 3,89 | 1,53 |
| -    | SMD_0420 | 1014 | 65,68 | 41  | 2,22 | 31  | 3,39 | 1,53 |
| -    | SMD_0714 | 264  | 68,56 | 113 | 3,08 | 115 | 4,70 | 1,53 |
| -    | SMD_3691 | 1347 | 67,85 | 44  | 2,95 | 57  | 4,50 | 1,52 |
| -    | SMD_3802 | 618  | 66,34 | 55  | 4,13 | 55  | 6,29 | 1,52 |
| fnr2 | SMD_2434 | 660  | 66,82 | 61  | 1,78 | 45  | 2,70 | 1,52 |
| -    | SMD_2907 | 1887 | 70,43 | 45  | 3,07 | 54  | 4,67 | 1,52 |
| -    | SMD_3836 | 411  | 63,99 | 119 | 2,17 | 161 | 3,29 | 1,52 |
| -    | SMD_2170 | 909  | 61,94 | 25  | 2,62 | 33  | 3,98 | 1,52 |
| -    | SMD_1458 | 303  | 67,99 | 28  | 3,57 | 21  | 5,41 | 1,51 |
| -    | SMD_0120 | 939  | 69,54 | 65  | 3,11 | 74  | 4,70 | 1,51 |
| -    | SMD_0462 | 615  | 60,49 | 8   | 3,05 | 21  | 4,62 | 1,51 |
| tatE | SMD_4173 | 228  | 65,79 | 342 | 3,46 | 341 | 5,24 | 1,51 |
| -    | SMD_0822 | 504  | 67,06 | 14  | 4,06 | 12  | 6,13 | 1,51 |
| -    | SMD_0395 | 753  | 65,74 | 251 | 2,59 | 234 | 3,91 | 1,51 |
| obg  | SMD_1193 | 1053 | 66,19 | 319 | 2,00 | 236 | 3,01 | 1,51 |
| -    | SMD_0076 | 474  | 69,62 | 51  | 2,50 | 41  | 3,76 | 1,50 |
| -    | SMD_1407 | 1593 | 60,33 | 43  | 2,97 | 39  | 4,47 | 1,50 |
| -    | SMD_2755 | 1185 | 65,49 | 27  | 1,89 | 23  | 2,84 | 1,50 |
| -    | SMD_0376 | 537  | 64,62 | 66  | 3,86 | 64  | 5,79 | 1,50 |
| -    | SMD_0058 | 921  | 67,75 | 153 | 2,53 | 131 | 3,79 | 1,50 |
| ribD | SMD_0611 | 1119 | 70,60 | 81  | 3,08 | 81  | 4,61 | 1,49 |
| agaR | SMD_4004 | 777  | 67,31 | 31  | 2,48 | 43  | 3,70 | 1,49 |
| coaE | SMD_3362 | 612  | 70,75 | 62  | 2,77 | 36  | 4,14 | 1,49 |
| -    | SMD_0974 | 471  | 62,63 | 618 | 2,70 | 742 | 4,03 | 1,49 |
| -    | SMD_0382 | 453  | 66,89 | 78  | 2,67 | 81  | 3,97 | 1,49 |
| -    | SMD_0366 | 1167 | 67,87 | 116 | 3,29 | 131 | 4,89 | 1,49 |

|       |          |      |       |      |      |      |      |      |
|-------|----------|------|-------|------|------|------|------|------|
| -     | SMD_3465 | 297  | 70,37 | 111  | 2,86 | 118  | 4,25 | 1,49 |
| -     | SMD_1934 | 1053 | 64,86 | 16   | 2,20 | 15   | 3,26 | 1,48 |
| -     | SMD_3487 | 579  | 68,74 | 91   | 2,25 | 111  | 3,34 | 1,48 |
| -     | SMD_2652 | 1524 | 69,95 | 25   | 3,40 | 32   | 5,04 | 1,48 |
| pilO  | SMD_3426 | 657  | 61,64 | 77   | 2,57 | 41   | 3,80 | 1,48 |
| -     | SMD_0629 | 1734 | 72,84 | 99   | 2,73 | 112  | 4,04 | 1,48 |
| -     | SMD_2639 | 1041 | 64,55 | 118  | 2,52 | 158  | 3,72 | 1,48 |
| ccmA  | SMD_2842 | 630  | 70,16 | 64   | 2,97 | 58   | 4,38 | 1,48 |
| -     | SMD_0556 | 1122 | 67,47 | 91   | 3,11 | 87   | 4,60 | 1,48 |
| maf   | SMD_3055 | 615  | 71,38 | 99   | 2,81 | 111  | 4,15 | 1,48 |
| -     | SMD_3860 | 1575 | 67,30 | 19   | 4,00 | 21   | 5,90 | 1,47 |
| xseB  | SMD_3047 | 261  | 65,52 | 328  | 2,98 | 325  | 4,38 | 1,47 |
| -     | SMD_3817 | 2382 | 69,35 | 42   | 2,61 | 62   | 3,84 | 1,47 |
| yegD  | SMD_3090 | 1362 | 70,70 | 32   | 3,40 | 28   | 5,00 | 1,47 |
| -     | SMD_2601 | 183  | 53,01 | 5    | 2,12 | 5    | 3,12 | 1,47 |
| exo   | SMD_0729 | 936  | 69,23 | 65   | 2,61 | 78   | 3,83 | 1,47 |
| nusG  | SMD_0773 | 561  | 62,21 | 1184 | 2,67 | 1154 | 3,92 | 1,47 |
| -     | SMD_4016 | 885  | 70,85 | 46   | 2,87 | 51   | 4,21 | 1,47 |
| -     | SMD_1619 | 258  | 65,12 | 87   | 2,25 | 77   | 3,29 | 1,47 |
| trpE  | SMD_3907 | 1476 | 67,07 | 112  | 4,46 | 111  | 6,54 | 1,47 |
| mtnA  | SMD_2718 | 1065 | 69,11 | 171  | 2,70 | 148  | 3,96 | 1,46 |
| -     | SMD_3178 | 123  | 54,47 | 79   | 1,65 | 88   | 2,41 | 1,46 |
| -     | SMD_1706 | 1401 | 64,88 | 125  | 2,04 | 138  | 2,98 | 1,46 |
| -     | SMD_1786 | 258  | 73,26 | 178  | 3,17 | 188  | 4,61 | 1,45 |
| -     | SMD_3671 | 324  | 75,93 | 11   | 4,29 | 2    | 6,24 | 1,45 |
| -     | SMD_0028 | 1041 | 68,01 | 129  | 3,35 | 135  | 4,87 | 1,45 |
| -     | SMD_0745 | 1266 | 65,80 | 52   | 2,76 | 61   | 4,01 | 1,45 |
| rstA  | SMD_0511 | 690  | 68,26 | 125  | 2,91 | 143  | 4,23 | 1,45 |
| -     | SMD_2767 | 606  | 66,67 | 63   | 2,02 | 56   | 2,94 | 1,45 |
| -     | SMD_2651 | 1737 | 65,28 | 21   | 3,10 | 21   | 4,50 | 1,45 |
| -     | SMD_2517 | 711  | 67,37 | 61   | 3,33 | 44   | 4,83 | 1,45 |
| -     | SMD_1301 | 1161 | 69,08 | 47   | 4,30 | 35   | 6,24 | 1,45 |
| -     | SMD_1780 | 864  | 65,74 | 41   | 2,74 | 45   | 3,98 | 1,45 |
| -     | SMD_0385 | 762  | 70,08 | 31   | 2,93 | 32   | 4,24 | 1,45 |
| -     | SMD_0006 | 807  | 66,79 | 141  | 3,00 | 152  | 4,34 | 1,45 |
| -     | SMD_3621 | 738  | 69,92 | 41   | 3,52 | 48   | 5,09 | 1,44 |
| -     | SMD_1530 | 501  | 57,29 | 111  | 2,56 | 118  | 3,70 | 1,44 |
| -     | SMD_3949 | 1320 | 69,62 | 15   | 2,37 | 12   | 3,42 | 1,44 |
| -     | SMD_2379 | 402  | 68,91 | 42   | 3,12 | 61   | 4,51 | 1,44 |
| -     | SMD_2923 | 204  | 68,14 | 154  | 2,78 | 115  | 4,00 | 1,44 |
| actP  | SMD_1960 | 2502 | 67,91 | 9    | 1,99 | 18   | 2,87 | 1,44 |
| -     | SMD_3334 | 801  | 67,17 | 23   | 2,08 | 24   | 3,00 | 1,44 |
| folB  | SMD_0377 | 354  | 63,84 | 125  | 2,57 | 151  | 3,70 | 1,44 |
| -     | SMD_2695 | 2109 | 68,28 | 26   | 4,63 | 16   | 6,66 | 1,44 |
| -     | SMD_3684 | 432  | 62,96 | 134  | 2,47 | 143  | 3,54 | 1,44 |
| -     | SMD_1470 | 1413 | 70,42 | 79   | 1,90 | 92   | 2,73 | 1,44 |
| -     | SMD_0136 | 687  | 66,67 | 71   | 2,77 | 156  | 3,98 | 1,44 |
| smpB  | SMD_1785 | 822  | 63,87 | 173  | 2,58 | 184  | 3,70 | 1,44 |
| -     | SMD_1507 | 633  | 65,09 | 55   | 3,38 | 67   | 4,85 | 1,43 |
| -     | SMD_0050 | 3933 | 58,73 | 37   | 3,92 | 38   | 5,62 | 1,43 |
| -     | SMD_0676 | 1299 | 64,74 | 143  | 2,62 | 155  | 3,75 | 1,43 |
| dusA  | SMD_0259 | 1032 | 71,41 | 94   | 3,16 | 118  | 4,52 | 1,43 |
| tldD  | SMD_3052 | 1446 | 69,29 | 95   | 2,53 | 59   | 3,62 | 1,43 |
| -     | SMD_2177 | 2034 | 53,79 | 112  | 2,92 | 112  | 4,18 | 1,43 |
| -     | SMD_0334 | 1128 | 72,07 | 48   | 2,63 | 46   | 3,76 | 1,43 |
| nadD  | SMD_3063 | 666  | 72,82 | 85   | 1,80 | 74   | 2,57 | 1,43 |
| -     | SMD_2758 | 243  | 65,02 | 315  | 1,92 | 269  | 2,75 | 1,43 |
| -     | SMD_2496 | 2130 | 67,89 | 78   | 2,72 | 41   | 3,88 | 1,43 |
| ssuE2 | SMD_0100 | 534  | 63,30 | 63   | 2,47 | 54   | 3,52 | 1,43 |
| -     | SMD_2891 | 924  | 66,99 | 51   | 3,30 | 37   | 4,71 | 1,43 |
| scpA  | SMD_2834 | 909  | 65,02 | 83   | 3,38 | 83   | 4,81 | 1,42 |
| -     | SMD_1935 | 816  | 69,85 | 45   | 3,03 | 54   | 4,32 | 1,42 |
| trmB  | SMD_3379 | 735  | 69,25 | 171  | 2,37 | 157  | 3,37 | 1,42 |
| -     | SMD_1092 | 534  | 68,16 | 54   | 2,34 | 33   | 3,33 | 1,42 |
| -     | SMD_3033 | 1584 | 67,17 | 26   | 3,05 | 23   | 4,33 | 1,42 |

|       |          |      |       |     |      |     |      |      |
|-------|----------|------|-------|-----|------|-----|------|------|
| -     | SMD_1627 | 987  | 69,81 | 111 | 3,20 | 97  | 4,55 | 1,42 |
| lexA  | SMD_1677 | 636  | 67,14 | 263 | 3,98 | 242 | 5,66 | 1,42 |
| -     | SMD_3034 | 672  | 66,07 | 116 | 3,18 | 124 | 4,51 | 1,42 |
| -     | SMD_1721 | 1227 | 70,17 | 91  | 3,42 | 111 | 4,85 | 1,42 |
| -     | SMD_4027 | 531  | 65,54 | 113 | 2,71 | 72  | 3,84 | 1,42 |
| phhA  | SMD_0029 | 894  | 65,66 | 518 | 3,32 | 455 | 4,69 | 1,41 |
| -     | SMD_0239 | 660  | 67,12 | 51  | 3,41 | 32  | 4,82 | 1,41 |
| fabG3 | SMD_3551 | 741  | 67,88 | 154 | 1,63 | 178 | 2,31 | 1,41 |
| selB  | SMD_3451 | 1932 | 69,36 | 18  | 2,85 | 21  | 4,04 | 1,41 |
| -     | SMD_4229 | 1242 | 67,31 | 113 | 2,79 | 85  | 3,94 | 1,41 |
| -     | SMD_2729 | 543  | 65,38 | 79  | 3,37 | 87  | 4,76 | 1,41 |
| -     | SMD_4161 | 408  | 68,14 | 81  | 2,31 | 78  | 3,26 | 1,41 |
| -     | SMD_4066 | 774  | 64,34 | 39  | 3,44 | 26  | 4,86 | 1,41 |
| modA  | SMD_2433 | 744  | 70,03 | 42  | 2,26 | 36  | 3,19 | 1,41 |
| Q     | SMD_3270 | 1008 | 65,77 | 33  | 2,86 | 33  | 4,03 | 1,41 |
| -     | SMD_0522 | 1284 | 66,43 | 17  | 6,61 | 13  | 9,31 | 1,41 |
| -     | SMD_3074 | 684  | 66,81 | 111 | 3,02 | 86  | 4,25 | 1,41 |
| -     | SMD_1031 | 951  | 65,83 | 45  | 2,59 | 59  | 3,65 | 1,41 |
| -     | SMD_1675 | 501  | 67,47 | 114 | 2,60 | 129 | 3,66 | 1,41 |
| -     | SMD_2723 | 1125 | 70,13 | 31  | 2,82 | 37  | 3,97 | 1,41 |
| -     | SMD_3108 | 411  | 70,32 | 49  | 2,39 | 65  | 3,36 | 1,41 |
| -     | SMD_3824 | 900  | 69,78 | 18  | 3,05 | 29  | 4,28 | 1,40 |
| ampDI | SMD_1393 | 567  | 68,96 | 119 | 3,52 | 111 | 4,94 | 1,40 |
| -     | SMD_1708 | 561  | 66,31 | 233 | 2,84 | 299 | 3,98 | 1,40 |
| clpB  | SMD_3336 | 2586 | 65,70 | 93  | 2,23 | 197 | 3,13 | 1,40 |
| tesB  | SMD_1185 | 921  | 69,27 | 111 | 2,71 | 111 | 3,79 | 1,40 |
| tatD  | SMD_4069 | 828  | 67,15 | 84  | 2,85 | 65  | 4,00 | 1,40 |
| -     | SMD_3587 | 1365 | 66,08 | 97  | 2,89 | 76  | 4,05 | 1,40 |
| purE  | SMD_1439 | 504  | 68,85 | 318 | 2,75 | 271 | 3,85 | 1,40 |
| -     | SMD_1186 | 777  | 70,01 | 32  | 2,02 | 31  | 2,82 | 1,40 |
| glpQ  | SMD_4234 | 1107 | 67,66 | 33  | 4,88 | 33  | 6,81 | 1,40 |
| -     | SMD_2099 | 1191 | 67,42 | 142 | 2,04 | 78  | 2,84 | 1,39 |
| -     | SMD_3672 | 603  | 65,34 | 134 | 2,80 | 164 | 3,91 | 1,39 |
| -     | SMD_3784 | 510  | 72,35 | 51  | 3,09 | 51  | 4,30 | 1,39 |
| mltA  | SMD_0108 | 837  | 69,53 | 45  | 4,01 | 44  | 5,58 | 1,39 |
| -     | SMD_2459 | 2265 | 70,46 | 58  | 2,11 | 58  | 2,94 | 1,39 |
| -     | SMD_2530 | 930  | 69,25 | 23  | 2,35 | 15  | 3,27 | 1,39 |
| -     | SMD_3590 | 972  | 71,19 | 28  | 3,22 | 25  | 4,48 | 1,39 |
| -     | SMD_1243 | 1188 | 68,94 | 33  | 2,46 | 24  | 3,42 | 1,39 |
| -     | SMD_4206 | 1461 | 71,87 | 24  | 3,40 | 18  | 4,72 | 1,39 |
| kgdA  | SMD_1725 | 660  | 68,64 | 45  | 1,70 | 69  | 2,37 | 1,39 |
| katA  | SMD_0296 | 1104 | 68,66 | 33  | 3,48 | 34  | 4,83 | 1,39 |
| -     | SMD_3368 | 678  | 65,49 | 129 | 3,69 | 159 | 5,12 | 1,39 |
| -     | SMD_1634 | 1623 | 65,25 | 74  | 2,34 | 87  | 3,25 | 1,39 |
| -     | SMD_3811 | 1164 | 67,10 | 14  | 3,68 | 16  | 5,11 | 1,39 |
| -     | SMD_3042 | 774  | 68,60 | 212 | 3,75 | 316 | 5,21 | 1,39 |
| lgt   | SMD_0693 | 888  | 66,67 | 114 | 2,78 | 115 | 3,85 | 1,39 |
| -     | SMD_3674 | 1008 | 67,96 | 54  | 3,45 | 44  | 4,77 | 1,38 |
| -     | SMD_0263 | 792  | 68,81 | 61  | 4,02 | 75  | 5,56 | 1,38 |
| GCDH  | SMD_0170 | 1164 | 67,01 | 71  | 2,98 | 61  | 4,12 | 1,38 |
| -     | SMD_2620 | 768  | 68,10 | 8   | 3,21 | 7   | 4,45 | 1,38 |
| -     | SMD_1222 | 795  | 68,18 | 58  | 2,66 | 58  | 3,67 | 1,38 |
| -     | SMD_2871 | 1329 | 65,91 | 69  | 2,06 | 48  | 2,84 | 1,38 |
| -     | SMD_3057 | 651  | 70,66 | 18  | 2,99 | 26  | 4,13 | 1,38 |
| -     | SMD_3028 | 2979 | 65,02 | 19  | 2,37 | 14  | 3,27 | 1,38 |
| phaAB | SMD_3914 | 2829 | 67,90 | 34  | 2,76 | 31  | 3,80 | 1,38 |
| rlpA  | SMD_3639 | 1269 | 70,53 | 111 | 3,33 | 164 | 4,57 | 1,37 |
| -     | SMD_2569 | 507  | 66,47 | 41  | 4,44 | 42  | 6,08 | 1,37 |
| ftsY  | SMD_1743 | 1032 | 69,67 | 112 | 2,24 | 129 | 3,07 | 1,37 |
| -     | SMD_4228 | 1428 | 66,95 | 97  | 2,57 | 85  | 3,53 | 1,37 |
| -     | SMD_1650 | 219  | 66,21 | 87  | 4,51 | 115 | 6,19 | 1,37 |
| -     | SMD_0751 | 1695 | 70,62 | 91  | 2,64 | 127 | 3,61 | 1,37 |
| -     | SMD_1834 | 888  | 68,47 | 218 | 2,40 | 234 | 3,28 | 1,37 |
| -     | SMD_3881 | 426  | 68,54 | 146 | 2,59 | 159 | 3,54 | 1,37 |
| nfi   | SMD_1267 | 675  | 71,11 | 44  | 3,72 | 45  | 5,10 | 1,37 |

|      |          |      |       |     |      |     |      |      |
|------|----------|------|-------|-----|------|-----|------|------|
| -    | SMD_2478 | 1110 | 69,46 | 343 | 3,23 | 324 | 4,41 | 1,37 |
| recQ | SMD_3255 | 1728 | 68,52 | 117 | 3,34 | 117 | 4,56 | 1,37 |
| glmU | SMD_3694 | 1368 | 67,32 | 123 | 2,37 | 141 | 3,24 | 1,37 |
| -    | SMD_0213 | 1101 | 66,76 | 113 | 2,59 | 121 | 3,54 | 1,37 |
| -    | SMD_3525 | 774  | 65,12 | 11  | 2,64 | 11  | 3,61 | 1,37 |
| rnG  | SMD_3054 | 1488 | 65,79 | 131 | 2,66 | 127 | 3,63 | 1,36 |
| -    | SMD_4128 | 1422 | 70,96 | 113 | 3,45 | 115 | 4,70 | 1,36 |
| D    | SMD_3295 | 996  | 65,76 | 24  | 2,41 | 18  | 3,28 | 1,36 |
| -    | SMD_3091 | 252  | 69,44 | 211 | 3,54 | 159 | 4,82 | 1,36 |
| -    | SMD_3247 | 537  | 69,27 | 111 | 2,37 | 142 | 3,22 | 1,36 |
| -    | SMD_1744 | 300  | 71,33 | 61  | 2,25 | 121 | 3,06 | 1,36 |
| -    | SMD_2818 | 600  | 67,67 | 272 | 3,55 | 285 | 4,83 | 1,36 |
| -    | SMD_1643 | 1314 | 65,45 | 271 | 3,07 | 283 | 4,17 | 1,36 |
| -    | SMD_3380 | 1848 | 66,72 | 81  | 2,89 | 75  | 3,92 | 1,36 |
| -    | SMD_3506 | 1122 | 69,34 | 48  | 2,51 | 42  | 3,41 | 1,36 |
| -    | SMD_3369 | 462  | 64,72 | 155 | 2,72 | 134 | 3,69 | 1,36 |
| -    | SMD_0267 | 855  | 74,15 | 29  | 3,49 | 31  | 4,73 | 1,36 |
| -    | SMD_1142 | 1260 | 70,40 | 21  | 2,82 | 21  | 3,82 | 1,35 |
| -    | SMD_1705 | 507  | 70,41 | 88  | 1,82 | 111 | 2,47 | 1,35 |
| -    | SMD_1160 | 1755 | 67,29 | 64  | 2,99 | 54  | 4,05 | 1,35 |
| plsB | SMD_0057 | 2628 | 67,73 | 162 | 3,06 | 159 | 4,14 | 1,35 |
| pilQ | SMD_3424 | 1923 | 66,30 | 51  | 2,82 | 33  | 3,82 | 1,35 |
| trxA | SMD_3857 | 330  | 63,94 | 491 | 1,93 | 556 | 2,62 | 1,35 |
| -    | SMD_0210 | 1446 | 70,68 | 41  | 2,53 | 33  | 3,42 | 1,35 |
| -    | SMD_2451 | 333  | 71,47 | 25  | 3,10 | 28  | 4,18 | 1,35 |
| -    | SMD_0519 | 990  | 66,97 | 161 | 2,29 | 183 | 3,09 | 1,35 |
| -    | SMD_0540 | 264  | 61,36 | 29  | 2,57 | 39  | 3,47 | 1,35 |
| kdsC | SMD_1038 | 549  | 71,04 | 116 | 2,60 | 118 | 3,51 | 1,35 |
| grxC | SMD_0854 | 291  | 68,04 | 115 | 2,27 | 142 | 3,06 | 1,35 |
| kefB | SMD_4086 | 1779 | 68,52 | 33  | 2,81 | 31  | 3,79 | 1,35 |
| -    | SMD_0709 | 1068 | 69,38 | 97  | 2,08 | 85  | 2,80 | 1,35 |
| -    | SMD_1821 | 1566 | 68,20 | 25  | 2,18 | 34  | 2,93 | 1,35 |
| -    | SMD_0181 | 636  | 70,13 | 142 | 2,23 | 134 | 3,00 | 1,34 |
| -    | SMD_1252 | 1065 | 67,14 | 338 | 1,88 | 212 | 2,53 | 1,34 |
| ctpA | SMD_0351 | 1485 | 67,74 | 135 | 3,33 | 195 | 4,47 | 1,34 |
| -    | SMD_0554 | 927  | 67,75 | 56  | 2,65 | 51  | 3,56 | 1,34 |
| -    | SMD_0730 | 582  | 72,34 | 96  | 3,50 | 113 | 4,70 | 1,34 |
| tnpA | SMD_2147 | 2985 | 62,24 | 22  | 2,23 | 29  | 2,99 | 1,34 |
| smeN | SMD_3391 | 3126 | 67,85 | 31  | 2,33 | 24  | 3,13 | 1,34 |
| -    | SMD_1527 | 348  | 62,93 | 114 | 2,50 | 118 | 3,35 | 1,34 |
| -    | SMD_0261 | 684  | 64,18 | 399 | 3,69 | 468 | 4,95 | 1,34 |
| -    | SMD_0739 | 498  | 64,66 | 256 | 3,59 | 244 | 4,80 | 1,34 |
| nudE | SMD_3230 | 564  | 66,84 | 211 | 2,32 | 192 | 3,10 | 1,34 |
| -    | SMD_0156 | 975  | 64,62 | 96  | 3,09 | 89  | 4,13 | 1,34 |
| -    | SMD_3560 | 540  | 65,93 | 81  | 2,76 | 88  | 3,68 | 1,33 |
| lhr  | SMD_0075 | 2490 | 67,43 | 21  | 5,55 | 23  | 7,40 | 1,33 |
| -    | SMD_2889 | 1017 | 71,68 | 84  | 3,10 | 75  | 4,13 | 1,33 |
| dnaG | SMD_0371 | 1740 | 67,47 | 119 | 2,76 | 112 | 3,67 | 1,33 |
| -    | SMD_3458 | 1227 | 66,91 | 65  | 2,59 | 56  | 3,44 | 1,33 |
| -    | SMD_1079 | 456  | 67,98 | 35  | 3,39 | 43  | 4,50 | 1,33 |
| -    | SMD_3141 | 390  | 65,38 | 45  | 2,42 | 35  | 3,22 | 1,33 |
| -    | SMD_0030 | 486  | 66,67 | 122 | 3,83 | 127 | 5,07 | 1,33 |
| -    | SMD_0764 | 2739 | 65,24 | 25  | 3,37 | 14  | 4,46 | 1,33 |
| -    | SMD_0938 | 705  | 68,94 | 61  | 2,33 | 54  | 3,09 | 1,33 |
| ubiB | SMD_0182 | 1656 | 67,93 | 158 | 2,70 | 133 | 3,58 | 1,32 |
| -    | SMD_2815 | 480  | 71,25 | 32  | 2,60 | 33  | 3,44 | 1,32 |
| -    | SMD_0572 | 414  | 71,50 | 43  | 2,73 | 34  | 3,61 | 1,32 |
| -    | SMD_0370 | 501  | 70,46 | 27  | 2,85 | 25  | 3,77 | 1,32 |
| -    | SMD_3262 | 423  | 66,19 | 18  | 3,77 | 24  | 4,99 | 1,32 |
| dxs  | SMD_2922 | 1911 | 67,03 | 225 | 2,76 | 231 | 3,64 | 1,32 |
| -    | SMD_1622 | 834  | 68,35 | 31  | 3,56 | 29  | 4,71 | 1,32 |
| -    | SMD_2032 | 384  | 65,10 | 352 | 2,19 | 248 | 2,89 | 1,32 |
| -    | SMD_3228 | 840  | 67,86 | 115 | 2,24 | 133 | 2,96 | 1,32 |
| -    | SMD_3747 | 573  | 57,77 | 268 | 2,46 | 226 | 3,25 | 1,32 |
| -    | SMD_3065 | 501  | 66,87 | 263 | 2,23 | 254 | 2,94 | 1,32 |

|       |          |      |       |      |      |      |      |      |
|-------|----------|------|-------|------|------|------|------|------|
| -     | SMD_0747 | 783  | 64,50 | 34   | 2,93 | 35   | 3,87 | 1,32 |
| osmC  | SMD_1086 | 432  | 66,44 | 66   | 2,74 | 91   | 3,61 | 1,32 |
| -     | SMD_0398 | 1515 | 65,68 | 196  | 2,43 | 216  | 3,21 | 1,32 |
| -     | SMD_1984 | 393  | 65,65 | 88   | 1,64 | 71   | 2,16 | 1,32 |
| -     | SMD_4106 | 798  | 68,92 | 81   | 3,04 | 62   | 4,00 | 1,32 |
| -     | SMD_2518 | 387  | 68,22 | 15   | 4,64 | 25   | 6,11 | 1,32 |
| -     | SMD_0653 | 585  | 67,86 | 38   | 2,87 | 37   | 3,78 | 1,32 |
| mgo   | SMD_1155 | 1689 | 65,78 | 26   | 3,30 | 19   | 4,35 | 1,32 |
| -     | SMD_0218 | 402  | 67,91 | 57   | 2,14 | 46   | 2,82 | 1,32 |
| -     | SMD_1422 | 1071 | 65,17 | 132  | 1,91 | 125  | 2,51 | 1,32 |
| -     | SMD_3705 | 366  | 67,49 | 312  | 4,66 | 497  | 6,13 | 1,31 |
| -     | SMD_4047 | 459  | 71,46 | 77   | 3,19 | 94   | 4,19 | 1,31 |
| cyoD  | SMD_1216 | 342  | 60,53 | 747  | 1,73 | 662  | 2,28 | 1,31 |
| czcD  | SMD_1566 | 549  | 63,21 | 61   | 3,28 | 41   | 4,30 | 1,31 |
| -     | SMD_3956 | 636  | 69,81 | 25   | 3,42 | 21   | 4,49 | 1,31 |
| -     | SMD_0310 | 705  | 68,51 | 196  | 3,53 | 133  | 4,63 | 1,31 |
| -     | SMD_0303 | 366  | 66,12 | 214  | 3,13 | 297  | 4,11 | 1,31 |
| ispF  | SMD_1658 | 498  | 68,88 | 117  | 1,79 | 115  | 2,34 | 1,31 |
| -     | SMD_3214 | 603  | 64,34 | 154  | 1,95 | 178  | 2,56 | 1,31 |
| -     | SMD_3483 | 5235 | 62,69 | 43   | 2,60 | 21   | 3,41 | 1,31 |
| -     | SMD_1245 | 1401 | 69,38 | 64   | 3,13 | 65   | 4,09 | 1,31 |
| radA  | SMD_1218 | 1377 | 69,57 | 54   | 3,50 | 55   | 4,57 | 1,31 |
| fhuE  | SMD_3599 | 2139 | 65,08 | 61   | 2,85 | 47   | 3,72 | 1,31 |
| -     | SMD_3306 | 666  | 68,77 | 111  | 2,61 | 118  | 3,41 | 1,30 |
| -     | SMD_1483 | 225  | 58,22 | 184  | 3,52 | 213  | 4,59 | 1,30 |
| parB  | SMD_4146 | 924  | 68,94 | 218  | 2,63 | 186  | 3,43 | 1,30 |
| -     | SMD_2735 | 663  | 63,20 | 116  | 2,17 | 121  | 2,82 | 1,30 |
| -     | SMD_3338 | 711  | 66,10 | 4    | 3,01 | 5    | 3,92 | 1,30 |
| -     | SMD_2225 | 2511 | 70,61 | 64   | 2,09 | 92   | 2,72 | 1,30 |
| msrA2 | SMD_0715 | 687  | 67,39 | 59   | 2,59 | 121  | 3,38 | 1,30 |
| -     | SMD_0329 | 663  | 67,42 | 317  | 2,13 | 328  | 2,78 | 1,30 |
| -     | SMD_3200 | 996  | 65,86 | 27   | 2,93 | 24   | 3,82 | 1,30 |
| -     | SMD_3500 | 2919 | 66,84 | 15   | 2,75 | 13   | 3,57 | 1,30 |
| rpfN  | SMD_2228 | 1254 | 65,87 | 36   | 1,93 | 53   | 2,51 | 1,30 |
| -     | SMD_3872 | 1332 | 67,79 | 37   | 3,05 | 53   | 3,97 | 1,30 |
| -     | SMD_3614 | 1101 | 68,21 | 47   | 2,46 | 49   | 3,20 | 1,30 |
| -     | SMD_1174 | 810  | 69,63 | 46   | 2,34 | 52   | 3,04 | 1,30 |
| -     | SMD_4165 | 1827 | 64,20 | 129  | 2,62 | 135  | 3,40 | 1,30 |
| -     | SMD_0734 | 330  | 68,79 | 12   | 3,54 | 19   | 4,60 | 1,30 |
| ivd   | SMD_0207 | 1164 | 66,49 | 197  | 2,27 | 197  | 2,95 | 1,30 |
| pilB  | SMD_3358 | 1731 | 65,11 | 73   | 3,09 | 56   | 4,01 | 1,30 |
| -     | SMD_1956 | 1023 | 70,09 | 62   | 2,31 | 58   | 2,99 | 1,30 |
| -     | SMD_1653 | 330  | 67,88 | 77   | 2,06 | 78   | 2,67 | 1,30 |
| recC  | SMD_4211 | 3342 | 70,08 | 51   | 2,76 | 56   | 3,57 | 1,30 |
| -     | SMD_1391 | 762  | 69,29 | 75   | 2,85 | 79   | 3,68 | 1,29 |
| -     | SMD_2623 | 657  | 64,54 | 58   | 1,96 | 69   | 2,53 | 1,29 |
| trpA  | SMD_2990 | 810  | 72,47 | 39   | 2,15 | 44   | 2,78 | 1,29 |
| -     | SMD_0498 | 792  | 67,93 | 112  | 3,24 | 88   | 4,19 | 1,29 |
| -     | SMD_3580 | 1149 | 68,32 | 17   | 3,10 | 16   | 4,01 | 1,29 |
| -     | SMD_0431 | 843  | 67,73 | 37   | 3,61 | 36   | 4,67 | 1,29 |
| -     | SMD_3212 | 849  | 67,26 | 175  | 4,21 | 194  | 5,44 | 1,29 |
| -     | SMD_1322 | 870  | 66,90 | 192  | 1,72 | 153  | 2,22 | 1,29 |
| lspA  | SMD_1198 | 525  | 65,33 | 187  | 1,82 | 239  | 2,35 | 1,29 |
| -     | SMD_4033 | 1299 | 71,13 | 34   | 2,55 | 26   | 3,28 | 1,29 |
| -     | SMD_3146 | 1650 | 66,24 | 28   | 2,60 | 41   | 3,35 | 1,29 |
| -     | SMD_0169 | 1686 | 67,08 | 82   | 2,64 | 88   | 3,40 | 1,29 |
| infC  | SMD_2951 | 480  | 58,96 | 2257 | 1,86 | 2298 | 2,39 | 1,29 |
| -     | SMD_0772 | 414  | 62,08 | 1751 | 2,65 | 1625 | 3,41 | 1,29 |
| -     | SMD_1120 | 966  | 66,56 | 29   | 2,72 | 31   | 3,50 | 1,29 |
| ftsJ  | SMD_1668 | 633  | 63,51 | 224  | 3,11 | 213  | 4,00 | 1,29 |
| -     | SMD_2687 | 378  | 64,02 | 44   | 3,51 | 77   | 4,51 | 1,28 |
| -     | SMD_0991 | 1098 | 64,03 | 38   | 2,79 | 53   | 3,58 | 1,28 |
| -     | SMD_2817 | 1767 | 72,10 | 53   | 3,29 | 53   | 4,22 | 1,28 |
| -     | SMD_4222 | 1008 | 69,64 | 9    | 2,75 | 8    | 3,53 | 1,28 |
| -     | SMD_0501 | 579  | 68,74 | 138  | 2,86 | 121  | 3,67 | 1,28 |



|       |          |      |       |     |      |     |      |      |
|-------|----------|------|-------|-----|------|-----|------|------|
| -     | SMD_1257 | 360  | 66,11 | 284 | 2,47 | 154 | 3,17 | 1,28 |
| -     | SMD_0119 | 1296 | 71,06 | 48  | 2,90 | 51  | 3,72 | 1,28 |
| -     | SMD_0152 | 1791 | 52,88 | 76  | 2,77 | 75  | 3,55 | 1,28 |
| -     | SMD_1462 | 1344 | 68,45 | 21  | 2,75 | 22  | 3,52 | 1,28 |
| -     | SMD_2476 | 336  | 70,54 | 169 | 2,48 | 152 | 3,17 | 1,28 |
| -     | SMD_0541 | 846  | 55,79 | 185 | 2,05 | 212 | 2,62 | 1,28 |
| -     | SMD_3329 | 1866 | 68,44 | 157 | 3,13 | 118 | 4,01 | 1,28 |
| fruA  | SMD_2227 | 1707 | 67,37 | 28  | 2,04 | 59  | 2,61 | 1,28 |
| mltB  | SMD_3640 | 1122 | 67,74 | 234 | 3,42 | 315 | 4,36 | 1,28 |
| -     | SMD_4125 | 555  | 65,77 | 154 | 2,34 | 146 | 2,99 | 1,28 |
| -     | SMD_0091 | 630  | 67,30 | 78  | 3,57 | 111 | 4,55 | 1,28 |
| -     | SMD_3485 | 663  | 68,33 | 71  | 2,50 | 87  | 3,18 | 1,28 |
| rodA  | SMD_3641 | 1104 | 68,03 | 14  | 2,77 | 11  | 3,54 | 1,27 |
| -     | SMD_2897 | 633  | 64,61 | 132 | 2,78 | 136 | 3,54 | 1,27 |
| -     | SMD_1665 | 489  | 67,48 | 114 | 2,42 | 121 | 3,09 | 1,27 |
| -     | SMD_2003 | 1041 | 69,45 | 34  | 2,52 | 35  | 3,21 | 1,27 |
| -     | SMD_0095 | 435  | 69,89 | 115 | 1,90 | 88  | 2,42 | 1,27 |
| -     | SMD_1425 | 1113 | 66,94 | 27  | 2,51 | 26  | 3,20 | 1,27 |
| -     | SMD_3007 | 651  | 69,28 | 33  | 3,12 | 31  | 3,97 | 1,27 |
| thiG  | SMD_3378 | 795  | 67,92 | 242 | 2,61 | 211 | 3,32 | 1,27 |
| -     | SMD_3389 | 1509 | 63,75 | 61  | 2,59 | 61  | 3,29 | 1,27 |
| -     | SMD_0848 | 2940 | 65,48 | 49  | 3,05 | 53  | 3,88 | 1,27 |
| -     | SMD_3058 | 2796 | 65,67 | 63  | 3,34 | 112 | 4,24 | 1,27 |
| -     | SMD_3043 | 1335 | 66,14 | 51  | 3,32 | 36  | 4,22 | 1,27 |
| dnaJ  | SMD_1795 | 1125 | 66,67 | 217 | 1,93 | 427 | 2,45 | 1,27 |
| -     | SMD_2318 | 1089 | 68,32 | 55  | 3,40 | 55  | 4,33 | 1,27 |
| -     | SMD_1018 | 756  | 66,27 | 67  | 3,16 | 72  | 4,02 | 1,27 |
| amn   | SMD_3561 | 777  | 63,84 | 158 | 3,19 | 162 | 4,05 | 1,27 |
| apt   | SMD_1822 | 537  | 69,09 | 126 | 1,99 | 118 | 2,53 | 1,27 |
| -     | SMD_3177 | 1191 | 66,92 | 61  | 2,36 | 78  | 3,00 | 1,27 |
| -     | SMD_0516 | 2595 | 67,32 | 11  | 4,66 | 4   | 5,91 | 1,27 |
| prfA  | SMD_0749 | 1083 | 68,61 | 82  | 2,47 | 89  | 3,14 | 1,27 |
| -     | SMD_3660 | 993  | 67,67 | 54  | 2,83 | 61  | 3,59 | 1,27 |
| -     | SMD_3478 | 873  | 64,83 | 61  | 2,74 | 65  | 3,48 | 1,27 |
| engC  | SMD_3554 | 1167 | 68,81 | 111 | 3,55 | 98  | 4,49 | 1,27 |
| -     | SMD_0177 | 417  | 69,54 | 52  | 2,55 | 63  | 3,23 | 1,27 |
| -     | SMD_0311 | 390  | 62,56 | 168 | 4,76 | 162 | 6,04 | 1,27 |
| -     | SMD_1586 | 450  | 66,22 | 82  | 1,62 | 61  | 2,05 | 1,27 |
| -     | SMD_1081 | 543  | 63,17 | 38  | 3,99 | 51  | 5,05 | 1,27 |
| -     | SMD_2773 | 897  | 71,57 | 59  | 2,27 | 73  | 2,87 | 1,27 |
| -     | SMD_1832 | 1221 | 68,80 | 91  | 2,25 | 115 | 2,85 | 1,27 |
| -     | SMD_2899 | 930  | 69,46 | 48  | 2,26 | 46  | 2,86 | 1,27 |
| -     | SMD_3782 | 930  | 68,28 | 78  | 2,82 | 89  | 3,57 | 1,27 |
| -     | SMD_0417 | 753  | 59,63 | 38  | 2,50 | 31  | 3,16 | 1,27 |
| -     | SMD_2150 | 3480 | 65,46 | 39  | 2,50 | 17  | 3,16 | 1,27 |
| lon   | SMD_0872 | 2448 | 64,75 | 154 | 2,06 | 299 | 2,61 | 1,26 |
| -     | SMD_3655 | 423  | 62,41 | 85  | 2,43 | 114 | 3,07 | 1,26 |
| -     | SMD_4048 | 1800 | 68,17 | 71  | 3,12 | 64  | 3,95 | 1,26 |
| ppx   | SMD_0849 | 1497 | 68,14 | 87  | 4,15 | 95  | 5,24 | 1,26 |
| lepB  | SMD_3128 | 795  | 63,52 | 274 | 2,07 | 226 | 2,61 | 1,26 |
| -     | SMD_0941 | 1047 | 67,05 | 115 | 3,05 | 129 | 3,85 | 1,26 |
| smeC  | SMD_4021 | 1416 | 69,56 | 11  | 4,00 | 9   | 5,05 | 1,26 |
| exoD  | SMD_1642 | 660  | 67,58 | 141 | 2,76 | 139 | 3,48 | 1,26 |
| purU  | SMD_0222 | 858  | 67,48 | 111 | 3,19 | 91  | 4,03 | 1,26 |
| -     | SMD_2165 | 2238 | 68,28 | 31  | 2,51 | 29  | 3,17 | 1,26 |
| -     | SMD_0372 | 894  | 66,22 | 38  | 3,65 | 45  | 4,61 | 1,26 |
| bcd   | SMD_2751 | 1149 | 64,75 | 186 | 2,15 | 174 | 2,72 | 1,26 |
| -     | SMD_3669 | 1194 | 68,59 | 78  | 3,26 | 86  | 4,11 | 1,26 |
| -     | SMD_3011 | 1506 | 67,80 | 75  | 2,98 | 81  | 3,76 | 1,26 |
| gst5  | SMD_3746 | 642  | 68,22 | 114 | 2,97 | 63  | 3,74 | 1,26 |
| -     | SMD_0226 | 1050 | 66,76 | 96  | 4,68 | 117 | 5,89 | 1,26 |
| -     | SMD_3760 | 864  | 65,74 | 14  | 2,89 | 22  | 3,64 | 1,26 |
| prmA  | SMD_3838 | 921  | 69,27 | 84  | 3,20 | 77  | 4,03 | 1,26 |
| nadC  | SMD_1437 | 852  | 71,01 | 171 | 2,30 | 162 | 2,89 | 1,26 |
| glnB2 | SMD_2138 | 324  | 63,89 | 115 | 1,52 | 127 | 1,91 | 1,26 |

|       |          |      |       |     |      |     |      |      |
|-------|----------|------|-------|-----|------|-----|------|------|
| -     | SMD_3476 | 603  | 66,83 | 49  | 2,73 | 51  | 3,44 | 1,26 |
| rep   | SMD_0046 | 1977 | 65,55 | 88  | 2,62 | 82  | 3,30 | 1,26 |
| -     | SMD_4190 | 546  | 68,13 | 48  | 2,46 | 24  | 3,10 | 1,26 |
| clpA  | SMD_2106 | 2286 | 65,62 | 84  | 2,67 | 142 | 3,35 | 1,26 |
| -     | SMD_3235 | 465  | 67,53 | 47  | 2,26 | 25  | 2,84 | 1,26 |
| -     | SMD_0189 | 528  | 66,86 | 45  | 3,22 | 47  | 4,04 | 1,26 |
| ycgI  | SMD_4088 | 261  | 64,37 | 196 | 4,60 | 192 | 5,78 | 1,26 |
| pilP  | SMD_3425 | 537  | 67,78 | 55  | 2,51 | 31  | 3,15 | 1,26 |
| pgk   | SMD_3403 | 1176 | 67,94 | 179 | 2,33 | 176 | 2,92 | 1,25 |
| xpsD  | SMD_0590 | 2208 | 67,48 | 45  | 2,26 | 41  | 2,84 | 1,25 |
| -     | SMD_2640 | 423  | 65,01 | 213 | 2,94 | 282 | 3,68 | 1,25 |
| infA  | SMD_2108 | 219  | 56,16 | 642 | 2,02 | 774 | 2,53 | 1,25 |
| -     | SMD_4029 | 993  | 69,08 | 47  | 2,81 | 48  | 3,52 | 1,25 |
| -     | SMD_0015 | 1092 | 64,01 | 49  | 6,39 | 51  | 8,01 | 1,25 |
| -     | SMD_2489 | 2628 | 68,04 | 5   | 3,51 | 6   | 4,39 | 1,25 |
| fliP  | SMD_2054 | 780  | 65,38 | 31  | 1,66 | 22  | 2,08 | 1,25 |
| -     | SMD_3120 | 696  | 68,10 | 61  | 2,50 | 88  | 3,13 | 1,25 |
| -     | SMD_1754 | 480  | 67,92 | 71  | 3,01 | 67  | 3,77 | 1,25 |
| -     | SMD_0705 | 585  | 68,72 | 139 | 3,43 | 145 | 4,29 | 1,25 |
| -     | SMD_0298 | 720  | 68,06 | 232 | 3,06 | 232 | 3,82 | 1,25 |
| -     | SMD_3373 | 1245 | 60,40 | 43  | 2,70 | 51  | 3,38 | 1,25 |
| corC  | SMD_1418 | 882  | 65,65 | 356 | 2,12 | 345 | 2,65 | 1,25 |
| -     | SMD_3267 | 429  | 63,87 | 46  | 6,94 | 39  | 8,67 | 1,25 |
| prlC  | SMD_3679 | 2031 | 67,06 | 28  | 2,31 | 54  | 2,89 | 1,25 |
| xpsF  | SMD_0581 | 1242 | 69,57 | 31  | 2,45 | 43  | 3,06 | 1,25 |
| -     | SMD_0166 | 639  | 66,51 | 48  | 3,99 | 54  | 4,97 | 1,25 |
| -     | SMD_0123 | 426  | 67,61 | 221 | 3,29 | 194 | 4,10 | 1,25 |
| -     | SMD_3039 | 1218 | 67,41 | 49  | 2,69 | 35  | 3,36 | 1,25 |
| oprP  | SMD_3543 | 1170 | 67,52 | 87  | 3,10 | 43  | 3,87 | 1,25 |
| hflX  | SMD_1674 | 1311 | 68,04 | 197 | 2,15 | 237 | 2,68 | 1,25 |
| -     | SMD_3682 | 516  | 66,28 | 145 | 2,58 | 111 | 3,21 | 1,25 |
| motA  | SMD_0478 | 855  | 65,61 | 79  | 3,33 | 51  | 4,15 | 1,25 |
| -     | SMD_3725 | 2532 | 68,44 | 31  | 4,53 | 13  | 5,65 | 1,25 |
| -     | SMD_2040 | 783  | 71,52 | 36  | 2,37 | 23  | 2,95 | 1,25 |
| -     | SMD_4097 | 603  | 68,16 | 45  | 2,18 | 58  | 2,71 | 1,24 |
| -     | SMD_1856 | 1182 | 70,56 | 35  | 2,00 | 36  | 2,48 | 1,24 |
| -     | SMD_0698 | 384  | 65,63 | 194 | 2,00 | 198 | 2,48 | 1,24 |
| -     | SMD_2880 | 1227 | 66,42 | 357 | 2,61 | 416 | 3,24 | 1,24 |
| -     | SMD_0211 | 858  | 69,11 | 18  | 2,82 | 16  | 3,51 | 1,24 |
| -     | SMD_3812 | 657  | 67,28 | 48  | 3,51 | 64  | 4,36 | 1,24 |
| -     | SMD_4107 | 744  | 72,85 | 51  | 3,49 | 46  | 4,34 | 1,24 |
| -     | SMD_0045 | 672  | 72,77 | 36  | 4,40 | 54  | 5,47 | 1,24 |
| -     | SMD_2339 | 1488 | 69,83 | 43  | 2,21 | 28  | 2,74 | 1,24 |
| topA  | SMD_3783 | 2493 | 65,66 | 161 | 2,47 | 168 | 3,06 | 1,24 |
| -     | SMD_0204 | 1167 | 70,27 | 59  | 2,03 | 37  | 2,51 | 1,24 |
| rlmN  | SMD_1850 | 1206 | 64,68 | 337 | 2,14 | 299 | 2,65 | 1,24 |
| -     | SMD_0472 | 1650 | 67,58 | 49  | 3,36 | 61  | 4,16 | 1,24 |
| -     | SMD_3409 | 801  | 67,29 | 133 | 2,68 | 132 | 3,31 | 1,24 |
| trmE  | SMD_4235 | 1350 | 69,85 | 31  | 3,03 | 31  | 3,75 | 1,24 |
| -     | SMD_4198 | 780  | 66,15 | 37  | 2,20 | 23  | 2,72 | 1,24 |
| -     | SMD_1847 | 2373 | 66,75 | 94  | 1,82 | 117 | 2,25 | 1,24 |
| sdhC  | SMD_1732 | 333  | 63,66 | 768 | 3,17 | 821 | 3,91 | 1,24 |
| -     | SMD_1202 | 708  | 67,80 | 48  | 2,27 | 39  | 2,81 | 1,24 |
| -     | SMD_1273 | 858  | 69,11 | 111 | 2,88 | 94  | 3,57 | 1,24 |
| -     | SMD_1143 | 1020 | 69,02 | 183 | 2,29 | 144 | 2,83 | 1,24 |
| mrcA  | SMD_3429 | 2424 | 68,56 | 79  | 3,08 | 87  | 3,81 | 1,23 |
| -     | SMD_0005 | 780  | 68,59 | 115 | 2,77 | 114 | 3,42 | 1,23 |
| fliC2 | SMD_2075 | 1179 | 67,35 | 719 | 2,47 | 436 | 3,05 | 1,23 |
| -     | SMD_2783 | 561  | 65,78 | 36  | 2,41 | 43  | 2,97 | 1,23 |
| nreB  | SMD_0144 | 1173 | 61,89 | 18  | 3,15 | 21  | 3,88 | 1,23 |
| -     | SMD_4156 | 666  | 67,42 | 119 | 3,99 | 118 | 4,92 | 1,23 |
| -     | SMD_1054 | 1026 | 68,03 | 67  | 2,28 | 61  | 2,80 | 1,23 |
| aroC  | SMD_3005 | 1104 | 69,38 | 171 | 2,58 | 159 | 3,18 | 1,23 |
| rph   | SMD_3455 | 726  | 70,11 | 98  | 2,52 | 82  | 3,10 | 1,23 |
| -     | SMD_3581 | 678  | 63,42 | 75  | 2,79 | 79  | 3,44 | 1,23 |

|         |          |      |       |     |      |     |      |      |
|---------|----------|------|-------|-----|------|-----|------|------|
| -       | SMD_0843 | 1458 | 67,97 | 14  | 3,04 | 12  | 3,74 | 1,23 |
| corA    | SMD_1416 | 1023 | 63,93 | 77  | 2,12 | 68  | 2,61 | 1,23 |
| hslU    | SMD_3661 | 1374 | 65,14 | 124 | 2,53 | 269 | 3,12 | 1,23 |
| dsbC    | SMD_0574 | 786  | 68,45 | 129 | 3,38 | 117 | 4,16 | 1,23 |
| cadC    | SMD_3510 | 2325 | 69,25 | 111 | 3,28 | 128 | 4,03 | 1,23 |
| ispA    | SMD_3048 | 879  | 70,53 | 142 | 2,98 | 165 | 3,67 | 1,23 |
| -       | SMD_3382 | 282  | 69,15 | 174 | 4,52 | 268 | 5,56 | 1,23 |
| hisB    | SMD_1949 | 1074 | 66,11 | 25  | 1,43 | 17  | 1,76 | 1,23 |
| -       | SMD_3367 | 1329 | 65,09 | 76  | 2,82 | 82  | 3,46 | 1,23 |
| -       | SMD_0409 | 834  | 68,11 | 34  | 4,34 | 32  | 5,33 | 1,23 |
| ribF    | SMD_1196 | 948  | 69,20 | 134 | 2,56 | 141 | 3,14 | 1,23 |
| -       | SMD_3509 | 900  | 67,00 | 151 | 2,66 | 165 | 3,27 | 1,23 |
| -       | SMD_1358 | 444  | 66,67 | 21  | 2,58 | 79  | 3,17 | 1,23 |
| -       | SMD_1711 | 258  | 67,05 | 139 | 2,85 | 131 | 3,49 | 1,23 |
| gshB    | SMD_3242 | 948  | 68,99 | 84  | 3,80 | 91  | 4,67 | 1,23 |
| aqpZ    | SMD_3135 | 720  | 67,36 | 155 | 3,18 | 127 | 3,90 | 1,23 |
| copB2   | SMD_3258 | 996  | 67,17 | 13  | 3,44 | 4   | 4,22 | 1,23 |
| pheS    | SMD_2948 | 996  | 67,37 | 169 | 2,93 | 161 | 3,60 | 1,23 |
| mdoD    | SMD_0042 | 1605 | 67,60 | 115 | 3,06 | 113 | 3,75 | 1,23 |
| -       | SMD_3869 | 513  | 65,69 | 38  | 3,30 | 59  | 4,05 | 1,23 |
| -       | SMD_1927 | 825  | 65,70 | 91  | 2,04 | 71  | 2,51 | 1,23 |
| tatC    | SMD_4171 | 750  | 65,33 | 86  | 3,39 | 113 | 4,15 | 1,23 |
| -       | SMD_1159 | 1989 | 67,27 | 81  | 3,40 | 66  | 4,17 | 1,23 |
| -       | SMD_3020 | 345  | 66,38 | 31  | 4,53 | 26  | 5,54 | 1,23 |
| -       | SMD_3946 | 435  | 66,21 | 12  | 5,63 | 14  | 6,89 | 1,23 |
| rluC    | SMD_2822 | 930  | 68,92 | 87  | 2,45 | 81  | 3,00 | 1,23 |
| ostA    | SMD_0702 | 2448 | 65,89 | 215 | 2,24 | 242 | 2,75 | 1,22 |
| -       | SMD_2230 | 1038 | 65,41 | 9   | 2,40 | 12  | 2,94 | 1,22 |
| hsp90xo | SMD_1219 | 1860 | 69,14 | 91  | 2,81 | 92  | 3,44 | 1,22 |
| tctD    | SMD_3548 | 690  | 67,54 | 71  | 2,98 | 74  | 3,65 | 1,22 |
| chiA2   | SMD_2957 | 1191 | 68,09 | 23  | 2,43 | 19  | 2,97 | 1,22 |
| -       | SMD_0447 | 1959 | 70,50 | 27  | 3,18 | 31  | 3,88 | 1,22 |
| -       | SMD_1075 | 1257 | 67,30 | 113 | 1,95 | 93  | 2,39 | 1,22 |
| lipB    | SMD_3635 | 711  | 70,46 | 294 | 3,20 | 354 | 3,91 | 1,22 |
| smmP    | SMD_4139 | 1206 | 71,64 | 36  | 3,30 | 32  | 4,03 | 1,22 |
| -       | SMD_0373 | 444  | 65,77 | 313 | 3,00 | 271 | 3,67 | 1,22 |
| -       | SMD_2879 | 1248 | 68,51 | 69  | 2,22 | 73  | 2,72 | 1,22 |
| -       | SMD_2884 | 705  | 72,91 | 75  | 2,11 | 61  | 2,57 | 1,22 |
| -       | SMD_3184 | 453  | 65,78 | 51  | 2,69 | 48  | 3,29 | 1,22 |
| -       | SMD_2457 | 1809 | 65,17 | 25  | 2,66 | 18  | 3,25 | 1,22 |
| mrda    | SMD_3643 | 2076 | 69,12 | 54  | 2,14 | 51  | 2,61 | 1,22 |
| -       | SMD_1807 | 1497 | 69,07 | 83  | 2,28 | 125 | 2,79 | 1,22 |
| -       | SMD_3755 | 333  | 58,56 | 45  | 2,23 | 53  | 2,73 | 1,22 |
| parE    | SMD_1648 | 1890 | 65,34 | 231 | 2,00 | 212 | 2,44 | 1,22 |
| gloB    | SMD_0934 | 765  | 65,10 | 224 | 5,04 | 261 | 6,16 | 1,22 |
| -       | SMD_3097 | 594  | 67,34 | 78  | 2,92 | 86  | 3,57 | 1,22 |
| -       | SMD_0225 | 1410 | 68,16 | 21  | 4,54 | 21  | 5,55 | 1,22 |
| pdhB    | SMD_3931 | 1068 | 68,82 | 394 | 2,03 | 365 | 2,47 | 1,22 |
| pcm2    | SMD_3530 | 648  | 67,75 | 486 | 2,59 | 518 | 3,15 | 1,22 |
| -       | SMD_3653 | 261  | 65,13 | 21  | 2,26 | 16  | 2,75 | 1,22 |
| -       | SMD_3908 | 930  | 69,14 | 28  | 3,22 | 37  | 3,91 | 1,22 |
| -       | SMD_3882 | 888  | 69,71 | 76  | 3,70 | 72  | 4,50 | 1,22 |
| ftsH    | SMD_1669 | 1926 | 66,04 | 232 | 2,48 | 271 | 3,02 | 1,22 |
| -       | SMD_0485 | 567  | 67,90 | 145 | 2,42 | 151 | 2,95 | 1,22 |
| -       | SMD_3123 | 729  | 68,86 | 225 | 3,27 | 183 | 3,98 | 1,22 |
| -       | SMD_0886 | 1746 | 58,65 | 59  | 2,35 | 66  | 2,85 | 1,21 |
| etfA    | SMD_0542 | 939  | 67,73 | 287 | 2,56 | 345 | 3,11 | 1,21 |
| smf     | SMD_3779 | 1128 | 72,07 | 15  | 2,99 | 24  | 3,63 | 1,21 |
| secG    | SMD_2982 | 438  | 67,35 | 512 | 3,32 | 432 | 4,02 | 1,21 |
| -       | SMD_4120 | 1521 | 68,57 | 51  | 3,32 | 35  | 4,03 | 1,21 |
| lctP    | SMD_2546 | 1659 | 65,58 | 13  | 3,84 | 24  | 4,65 | 1,21 |
| -       | SMD_0257 | 594  | 67,85 | 177 | 3,47 | 165 | 4,21 | 1,21 |
| -       | SMD_3559 | 957  | 68,03 | 311 | 2,80 | 315 | 3,40 | 1,21 |
| -       | SMD_1311 | 816  | 69,49 | 57  | 3,28 | 52  | 3,98 | 1,21 |
| -       | SMD_3140 | 1251 | 66,03 | 67  | 2,83 | 33  | 3,43 | 1,21 |

|       |          |      |       |      |      |      |      |      |
|-------|----------|------|-------|------|------|------|------|------|
| -     | SMD_3582 | 417  | 67,39 | 14   | 2,80 | 15   | 3,39 | 1,21 |
| -     | SMD_3623 | 744  | 66,80 | 16   | 2,66 | 22   | 3,23 | 1,21 |
| -     | SMD_2791 | 825  | 66,42 | 154  | 3,10 | 159  | 3,76 | 1,21 |
| mscL  | SMD_3384 | 405  | 63,46 | 171  | 2,45 | 151  | 2,96 | 1,21 |
| hemK  | SMD_0721 | 858  | 71,10 | 47   | 3,52 | 61   | 4,25 | 1,21 |
| -     | SMD_0512 | 1902 | 69,87 | 212  | 2,29 | 198  | 2,77 | 1,21 |
| -     | SMD_0840 | 780  | 68,72 | 111  | 2,78 | 118  | 3,36 | 1,21 |
| -     | SMD_0565 | 822  | 69,34 | 42   | 2,76 | 34   | 3,34 | 1,21 |
| -     | SMD_0537 | 792  | 64,77 | 5    | 3,91 | 3    | 4,74 | 1,21 |
| -     | SMD_2105 | 813  | 70,11 | 26   | 2,59 | 21   | 3,13 | 1,21 |
| -     | SMD_2661 | 399  | 65,41 | 11   | 2,58 | 7    | 3,11 | 1,21 |
| -     | SMD_3889 | 2241 | 68,90 | 49   | 3,41 | 51   | 4,12 | 1,21 |
| -     | SMD_2808 | 855  | 67,84 | 133  | 2,55 | 98   | 3,08 | 1,21 |
| guaB  | SMD_1859 | 1464 | 66,53 | 494  | 2,60 | 451  | 3,14 | 1,21 |
| purK  | SMD_1440 | 1149 | 69,54 | 251  | 2,51 | 221  | 3,03 | 1,21 |
| engA  | SMD_1855 | 1398 | 65,52 | 246  | 2,03 | 194  | 2,45 | 1,21 |
| -     | SMD_0282 | 933  | 67,63 | 76   | 3,00 | 68   | 3,62 | 1,21 |
| -     | SMD_3681 | 1113 | 66,58 | 97   | 2,84 | 96   | 3,42 | 1,21 |
| -     | SMD_0124 | 438  | 67,35 | 472  | 2,45 | 463  | 2,95 | 1,21 |
| -     | SMD_3307 | 702  | 66,95 | 96   | 2,53 | 78   | 3,05 | 1,20 |
| kdsD  | SMD_1039 | 1002 | 70,66 | 87   | 3,01 | 74   | 3,62 | 1,20 |
| -     | SMD_3468 | 480  | 62,92 | 94   | 3,30 | 79   | 3,98 | 1,20 |
| otsA  | SMD_3346 | 1365 | 67,25 | 24   | 2,87 | 28   | 3,46 | 1,20 |
| -     | SMD_3924 | 1113 | 62,80 | 227  | 2,72 | 241  | 3,27 | 1,20 |
| fruK  | SMD_2226 | 957  | 70,43 | 36   | 1,31 | 73   | 1,57 | 1,20 |
| -     | SMD_0244 | 1152 | 61,28 | 25   | 2,94 | 17   | 3,53 | 1,20 |
| -     | SMD_0684 | 687  | 64,77 | 239  | 2,76 | 348  | 3,31 | 1,20 |
| -     | SMD_1479 | 864  | 65,74 | 17   | 2,85 | 19   | 3,42 | 1,20 |
| gltX  | SMD_1279 | 1404 | 66,74 | 334  | 2,43 | 318  | 2,92 | 1,20 |
| deaD  | SMD_1296 | 1956 | 68,20 | 415  | 3,31 | 257  | 3,97 | 1,20 |
| -     | SMD_2685 | 492  | 68,70 | 66   | 3,05 | 73   | 3,66 | 1,20 |
| -     | SMD_3049 | 372  | 60,75 | 271  | 2,80 | 226  | 3,36 | 1,20 |
| -     | SMD_3220 | 1401 | 68,81 | 233  | 3,44 | 293  | 4,13 | 1,20 |
| pilA  | SMD_3359 | 420  | 58,33 | 743  | 2,53 | 291  | 3,04 | 1,20 |
| -     | SMD_4049 | 516  | 70,16 | 67   | 2,53 | 73   | 3,03 | 1,20 |
| lpxD  | SMD_1328 | 1023 | 69,11 | 226  | 2,24 | 239  | 2,68 | 1,20 |
| -     | SMD_1330 | 1359 | 68,29 | 126  | 2,12 | 126  | 2,54 | 1,20 |
| virB9 | SMD_2638 | 780  | 58,97 | 214  | 2,27 | 239  | 2,72 | 1,20 |
| -     | SMD_1224 | 1077 | 71,96 | 31   | 2,62 | 31   | 3,14 | 1,20 |
| -     | SMD_1583 | 1140 | 66,32 | 97   | 2,15 | 71   | 2,57 | 1,20 |
| hmgA  | SMD_3923 | 1299 | 67,28 | 117  | 2,13 | 125  | 2,56 | 1,20 |
| -     | SMD_0302 | 471  | 71,13 | 116  | 2,57 | 136  | 3,08 | 1,20 |
| -     | SMD_0733 | 453  | 71,96 | 34   | 3,98 | 45   | 4,76 | 1,20 |
| -     | SMD_0731 | 2253 | 69,02 | 124  | 2,89 | 115  | 3,46 | 1,20 |
| mtnB  | SMD_1972 | 669  | 66,22 | 77   | 2,54 | 79   | 3,03 | 1,20 |
| -     | SMD_2710 | 1431 | 62,12 | 44   | 2,61 | 36   | 3,12 | 1,20 |
| thrB  | SMD_1940 | 915  | 70,71 | 11   | 2,29 | 11   | 2,74 | 1,20 |
| -     | SMD_4177 | 2106 | 69,66 | 33   | 3,21 | 18   | 3,84 | 1,20 |
| hydG  | SMD_3357 | 1374 | 69,14 | 114  | 3,13 | 116  | 3,73 | 1,19 |
| -     | SMD_4083 | 2727 | 69,16 | 45   | 3,31 | 45   | 3,95 | 1,19 |
| -     | SMD_0823 | 1056 | 68,28 | 59   | 3,36 | 66   | 4,01 | 1,19 |
| -     | SMD_0844 | 1254 | 65,71 | 44   | 2,88 | 41   | 3,44 | 1,19 |
| waaE  | SMD_3772 | 807  | 69,27 | 53   | 3,19 | 51   | 3,81 | 1,19 |
| mviM  | SMD_0052 | 651  | 72,04 | 74   | 3,83 | 75   | 4,57 | 1,19 |
| -     | SMD_0079 | 2169 | 70,31 | 14   | 2,80 | 11   | 3,34 | 1,19 |
| fadD  | SMD_2017 | 1677 | 63,69 | 114  | 2,97 | 114  | 3,55 | 1,19 |
| rumA  | SMD_3122 | 1335 | 66,74 | 121  | 2,91 | 113  | 3,47 | 1,19 |
| recO  | SMD_3124 | 720  | 72,08 | 57   | 2,43 | 54   | 2,90 | 1,19 |
| -     | SMD_3901 | 762  | 69,03 | 112  | 3,04 | 115  | 3,62 | 1,19 |
| -     | SMD_0524 | 366  | 73,77 | 167  | 2,73 | 213  | 3,25 | 1,19 |
| rpsO  | SMD_2959 | 309  | 61,17 | 1611 | 2,45 | 1455 | 2,92 | 1,19 |
| proP  | SMD_2380 | 1491 | 66,60 | 32   | 3,65 | 35   | 4,35 | 1,19 |
| smeK  | SMD_3875 | 3123 | 66,70 | 21   | 3,10 | 21   | 3,69 | 1,19 |
| -     | SMD_0860 | 621  | 66,51 | 14   | 3,49 | 21   | 4,15 | 1,19 |
| -     | SMD_0520 | 669  | 69,66 | 92   | 2,91 | 113  | 3,46 | 1,19 |

|       |          |      |       |     |      |     |      |      |
|-------|----------|------|-------|-----|------|-----|------|------|
| -     | SMD_0510 | 1353 | 70,51 | 53  | 2,99 | 42  | 3,56 | 1,19 |
| rpoN2 | SMD_2069 | 1410 | 70,50 | 61  | 3,18 | 44  | 3,78 | 1,19 |
| pncA  | SMD_0223 | 627  | 71,29 | 85  | 3,01 | 54  | 3,58 | 1,19 |
| -     | SMD_1187 | 321  | 68,54 | 53  | 2,48 | 42  | 2,96 | 1,19 |
| -     | SMD_3722 | 1920 | 69,06 | 29  | 3,59 | 29  | 4,27 | 1,19 |
| ftsK  | SMD_2113 | 2361 | 66,96 | 111 | 2,58 | 128 | 3,06 | 1,19 |
| fabH2 | SMD_0976 | 978  | 64,01 | 524 | 2,34 | 458 | 2,78 | 1,19 |
| mraZ  | SMD_0635 | 402  | 63,18 | 414 | 3,40 | 546 | 4,03 | 1,19 |
| -     | SMD_0474 | 543  | 65,93 | 133 | 3,15 | 138 | 3,74 | 1,19 |
| -     | SMD_3133 | 2064 | 68,65 | 45  | 2,96 | 61  | 3,51 | 1,19 |
| -     | SMD_0458 | 1650 | 67,58 | 85  | 2,24 | 87  | 2,66 | 1,19 |
| smc   | SMD_2725 | 3504 | 67,84 | 71  | 2,51 | 81  | 2,98 | 1,19 |
| -     | SMD_0061 | 867  | 68,74 | 45  | 3,38 | 41  | 4,01 | 1,19 |
| clpX  | SMD_0871 | 1290 | 62,87 | 597 | 2,34 | 623 | 2,78 | 1,19 |
| -     | SMD_3491 | 390  | 68,72 | 39  | 2,88 | 44  | 3,42 | 1,19 |
| wbpO  | SMD_1633 | 1287 | 66,90 | 121 | 2,65 | 141 | 3,15 | 1,19 |
| -     | SMD_2665 | 1326 | 64,03 | 28  | 2,34 | 25  | 2,77 | 1,19 |
| -     | SMD_0815 | 1611 | 71,32 | 38  | 3,30 | 37  | 3,91 | 1,19 |
| -     | SMD_3194 | 3207 | 69,66 | 19  | 2,99 | 11  | 3,54 | 1,19 |
| ptrB  | SMD_3668 | 2112 | 65,20 | 51  | 2,73 | 94  | 3,23 | 1,18 |
| -     | SMD_1060 | 609  | 67,49 | 43  | 2,82 | 62  | 3,35 | 1,18 |
| -     | SMD_2993 | 888  | 74,44 | 15  | 2,41 | 14  | 2,85 | 1,18 |
| -     | SMD_3056 | 738  | 68,43 | 62  | 3,71 | 67  | 4,39 | 1,18 |
| -     | SMD_3654 | 336  | 64,88 | 37  | 2,39 | 56  | 2,83 | 1,18 |
| -     | SMD_2298 | 1140 | 65,53 | 131 | 2,61 | 136 | 3,09 | 1,18 |
| ispD  | SMD_1657 | 699  | 70,39 | 154 | 2,14 | 143 | 2,54 | 1,18 |
| -     | SMD_1974 | 1476 | 66,19 | 95  | 2,39 | 98  | 2,83 | 1,18 |
| -     | SMD_3093 | 867  | 68,63 | 37  | 4,69 | 55  | 5,55 | 1,18 |
| -     | SMD_2236 | 1059 | 68,37 | 21  | 2,54 | 19  | 3,01 | 1,18 |
| -     | SMD_4162 | 1125 | 67,56 | 69  | 2,39 | 63  | 2,83 | 1,18 |
| himA  | SMD_2946 | 300  | 58,33 | 818 | 2,34 | 871 | 2,76 | 1,18 |
| -     | SMD_0221 | 942  | 69,75 | 42  | 3,34 | 41  | 3,95 | 1,18 |
| rpoZ  | SMD_3444 | 300  | 62,33 | 468 | 3,58 | 561 | 4,22 | 1,18 |
| fabF  | SMD_0981 | 1263 | 64,45 | 444 | 2,25 | 386 | 2,66 | 1,18 |
| pbpC  | SMD_3174 | 2382 | 70,49 | 14  | 2,13 | 12  | 2,51 | 1,18 |
| -     | SMD_0258 | 2415 | 67,54 | 113 | 2,82 | 111 | 3,32 | 1,18 |
| ffh   | SMD_1223 | 1377 | 66,01 | 219 | 2,71 | 218 | 3,20 | 1,18 |
| ampN  | SMD_0331 | 663  | 65,46 | 112 | 2,80 | 114 | 3,30 | 1,18 |
| sufB  | SMD_1078 | 1476 | 64,91 | 73  | 3,38 | 74  | 3,99 | 1,18 |
| argH  | SMD_2868 | 1296 | 68,52 | 66  | 2,04 | 57  | 2,40 | 1,18 |
| -     | SMD_2127 | 789  | 65,65 | 164 | 2,48 | 186 | 2,92 | 1,18 |
| cbpA  | SMD_3171 | 888  | 68,36 | 119 | 2,35 | 143 | 2,77 | 1,18 |
| -     | SMD_4192 | 891  | 68,46 | 97  | 2,64 | 116 | 3,11 | 1,18 |
| prfB  | SMD_2008 | 927  | 66,02 | 532 | 2,07 | 519 | 2,44 | 1,18 |
| metF  | SMD_0654 | 828  | 65,82 | 15  | 3,71 | 13  | 4,36 | 1,18 |
| lspA2 | SMD_2136 | 471  | 64,54 | 22  | 1,14 | 32  | 1,34 | 1,18 |
| -     | SMD_0727 | 798  | 68,92 | 72  | 2,46 | 85  | 2,90 | 1,18 |
| hscC  | SMD_4160 | 1689 | 67,38 | 67  | 3,20 | 69  | 3,76 | 1,18 |
| gap   | SMD_3406 | 1005 | 62,49 | 793 | 2,52 | 764 | 2,96 | 1,17 |
| -     | SMD_3648 | 621  | 69,57 | 97  | 2,64 | 96  | 3,10 | 1,17 |
| -     | SMD_3928 | 1500 | 64,33 | 267 | 2,20 | 254 | 2,59 | 1,17 |
| -     | SMD_1036 | 567  | 65,26 | 158 | 2,75 | 156 | 3,22 | 1,17 |
| lpsI  | SMD_0550 | 735  | 64,08 | 156 | 2,74 | 174 | 3,22 | 1,17 |
| -     | SMD_3321 | 522  | 68,58 | 234 | 2,23 | 229 | 2,61 | 1,17 |
| -     | SMD_2986 | 1146 | 68,41 | 138 | 2,30 | 121 | 2,70 | 1,17 |
| -     | SMD_4042 | 864  | 74,07 | 45  | 2,99 | 48  | 3,51 | 1,17 |
| tdk   | SMD_0043 | 621  | 66,83 | 85  | 3,93 | 81  | 4,60 | 1,17 |
| cysQ  | SMD_3229 | 804  | 67,41 | 161 | 2,82 | 157 | 3,31 | 1,17 |
| -     | SMD_3997 | 4698 | 62,62 | 17  | 3,65 | 11  | 4,28 | 1,17 |
| ipk   | SMD_0753 | 870  | 69,20 | 184 | 2,43 | 293 | 2,84 | 1,17 |
| -     | SMD_2933 | 234  | 64,10 | 85  | 5,09 | 83  | 5,95 | 1,17 |
| -     | SMD_1281 | 1155 | 67,45 | 27  | 2,53 | 25  | 2,95 | 1,17 |
| -     | SMD_1515 | 768  | 67,45 | 5   | 2,94 | 12  | 3,44 | 1,17 |
| ribE  | SMD_0615 | 627  | 66,19 | 63  | 3,56 | 53  | 4,17 | 1,17 |
| fliC  | SMD_2076 | 1185 | 66,33 | 633 | 2,56 | 363 | 2,99 | 1,17 |

|       |          |      |       |      |      |      |      |      |
|-------|----------|------|-------|------|------|------|------|------|
| -     | SMD_1290 | 1182 | 67,17 | 91   | 3,47 | 98   | 4,05 | 1,17 |
| dxr   | SMD_1331 | 1191 | 69,94 | 166  | 2,01 | 151  | 2,35 | 1,17 |
| -     | SMD_3620 | 1185 | 69,11 | 65   | 3,28 | 81   | 3,83 | 1,17 |
| -     | SMD_1421 | 486  | 67,70 | 132  | 2,20 | 154  | 2,57 | 1,17 |
| prfC  | SMD_3205 | 1605 | 65,92 | 172  | 2,71 | 164  | 3,16 | 1,17 |
| -     | SMD_3617 | 2664 | 63,48 | 48   | 2,89 | 45   | 3,37 | 1,17 |
| -     | SMD_0047 | 357  | 70,59 | 9    | 3,43 | 4    | 4,01 | 1,17 |
| -     | SMD_3335 | 516  | 67,44 | 77   | 2,68 | 151  | 3,13 | 1,17 |
| -     | SMD_1578 | 1107 | 68,47 | 16   | 3,00 | 16   | 3,50 | 1,17 |
| lctD  | SMD_2544 | 1140 | 67,54 | 32   | 1,91 | 41   | 2,23 | 1,17 |
| -     | SMD_2995 | 702  | 73,79 | 14   | 2,22 | 11   | 2,59 | 1,17 |
| pilT  | SMD_1013 | 1038 | 63,01 | 61   | 3,66 | 54   | 4,27 | 1,17 |
| dhaA  | SMD_0176 | 891  | 66,67 | 99   | 3,06 | 71   | 3,57 | 1,17 |
| -     | SMD_1306 | 1833 | 65,25 | 39   | 2,48 | 36   | 2,89 | 1,16 |
| rnr   | SMD_1367 | 2460 | 67,24 | 161  | 2,20 | 163  | 2,56 | 1,16 |
| -     | SMD_3692 | 1353 | 66,59 | 41   | 2,95 | 44   | 3,44 | 1,16 |
| -     | SMD_2860 | 1206 | 68,49 | 34   | 3,20 | 31   | 3,72 | 1,16 |
| trwI  | SMD_2630 | 1122 | 58,65 | 185  | 1,68 | 215  | 1,95 | 1,16 |
| -     | SMD_0086 | 1632 | 67,03 | 63   | 2,27 | 56   | 2,64 | 1,16 |
| -     | SMD_0316 | 753  | 68,26 | 99   | 3,12 | 112  | 3,63 | 1,16 |
| mrkC  | SMD_0597 | 2586 | 67,17 | 341  | 2,55 | 281  | 2,96 | 1,16 |
| -     | SMD_1924 | 360  | 65,00 | 51   | 3,00 | 66   | 3,49 | 1,16 |
| -     | SMD_1392 | 903  | 71,21 | 49   | 2,63 | 59   | 3,05 | 1,16 |
| atpC  | SMD_3697 | 423  | 66,19 | 1152 | 1,87 | 1187 | 2,18 | 1,16 |
| -     | SMD_3121 | 486  | 66,05 | 69   | 2,97 | 77   | 3,45 | 1,16 |
| hmgcl | SMD_1988 | 897  | 70,23 | 48   | 2,55 | 66   | 2,96 | 1,16 |
| yaiO  | SMD_0183 | 786  | 66,28 | 51   | 2,62 | 43   | 3,04 | 1,16 |
| -     | SMD_2768 | 426  | 63,38 | 71   | 2,53 | 87   | 2,93 | 1,16 |
| -     | SMD_1309 | 1809 | 66,00 | 217  | 2,13 | 175  | 2,48 | 1,16 |
| -     | SMD_0598 | 1038 | 65,41 | 418  | 2,11 | 334  | 2,45 | 1,16 |
| ubiF  | SMD_0707 | 1170 | 71,62 | 91   | 2,83 | 99   | 3,28 | 1,16 |
| -     | SMD_1236 | 603  | 70,48 | 43   | 2,85 | 52   | 3,31 | 1,16 |
| proB  | SMD_2866 | 1158 | 72,11 | 36   | 1,92 | 22   | 2,23 | 1,16 |
| -     | SMD_0299 | 333  | 65,47 | 76   | 3,69 | 67   | 4,28 | 1,16 |
| -     | SMD_2998 | 675  | 66,07 | 52   | 2,13 | 43   | 2,46 | 1,16 |
| -     | SMD_1162 | 1965 | 67,28 | 123  | 2,58 | 126  | 2,99 | 1,16 |
| -     | SMD_2193 | 2646 | 68,33 | 21   | 2,79 | 13   | 3,24 | 1,16 |
| efp2  | SMD_1986 | 567  | 63,67 | 369  | 2,13 | 377  | 2,47 | 1,16 |
| -     | SMD_3627 | 1818 | 67,60 | 78   | 3,16 | 111  | 3,65 | 1,16 |
| rpfF  | SMD_2016 | 873  | 66,78 | 31   | 3,36 | 31   | 3,90 | 1,16 |
| -     | SMD_3837 | 972  | 69,03 | 81   | 2,87 | 117  | 3,32 | 1,16 |
| pabA  | SMD_3905 | 588  | 65,82 | 75   | 2,98 | 82   | 3,45 | 1,16 |
| polA  | SMD_4122 | 2775 | 68,22 | 134  | 2,83 | 125  | 3,28 | 1,16 |
| fur   | SMD_1788 | 417  | 61,87 | 332  | 2,66 | 351  | 3,08 | 1,16 |
| ung   | SMD_3851 | 714  | 66,81 | 137  | 2,45 | 152  | 2,84 | 1,16 |
| -     | SMD_0454 | 1197 | 66,92 | 142  | 4,41 | 79   | 5,10 | 1,16 |
| -     | SMD_3243 | 885  | 71,86 | 56   | 3,01 | 62   | 3,48 | 1,16 |
| -     | SMD_3236 | 1332 | 72,15 | 54   | 2,33 | 23   | 2,69 | 1,15 |
| -     | SMD_0378 | 1272 | 67,30 | 73   | 2,91 | 81   | 3,36 | 1,15 |
| -     | SMD_1131 | 1128 | 68,17 | 48   | 3,54 | 34   | 4,09 | 1,15 |
| ilvK  | SMD_2012 | 1641 | 66,97 | 21   | 2,88 | 26   | 3,32 | 1,15 |
| -     | SMD_1827 | 462  | 67,53 | 66   | 2,68 | 61   | 3,09 | 1,15 |
| -     | SMD_3155 | 1368 | 67,84 | 58   | 3,13 | 45   | 3,61 | 1,15 |
| -     | SMD_0606 | 426  | 71,36 | 134  | 4,46 | 186  | 5,14 | 1,15 |
| xpsN  | SMD_0589 | 789  | 72,62 | 26   | 2,44 | 21   | 2,81 | 1,15 |
| hsdR  | SMD_1862 | 2766 | 56,80 | 92   | 2,72 | 85   | 3,13 | 1,15 |
| -     | SMD_2111 | 1584 | 59,91 | 29   | 2,86 | 38   | 3,29 | 1,15 |
| lipA  | SMD_3634 | 1011 | 66,37 | 329  | 2,89 | 378  | 3,33 | 1,15 |
| -     | SMD_3536 | 1116 | 71,15 | 82   | 3,56 | 94   | 4,09 | 1,15 |
| mltD  | SMD_0933 | 1143 | 71,39 | 141  | 4,61 | 157  | 5,30 | 1,15 |
| mreC  | SMD_3645 | 1146 | 72,60 | 71   | 2,71 | 81   | 3,11 | 1,15 |
| suhB  | SMD_2893 | 828  | 67,03 | 239  | 3,63 | 192  | 4,17 | 1,15 |
| -     | SMD_2743 | 945  | 69,31 | 62   | 2,90 | 77   | 3,33 | 1,15 |
| tolR  | SMD_3312 | 429  | 65,50 | 178  | 2,46 | 187  | 2,83 | 1,15 |
| dnaA  | SMD_0001 | 1332 | 64,64 | 216  | 3,13 | 221  | 3,60 | 1,15 |

|       |          |      |       |      |      |      |      |      |
|-------|----------|------|-------|------|------|------|------|------|
| wbil  | SMD_1844 | 1914 | 65,94 | 133  | 2,29 | 129  | 2,63 | 1,15 |
| -     | SMD_0856 | 1005 | 64,88 | 711  | 2,07 | 787  | 2,38 | 1,15 |
| aroB  | SMD_3189 | 1113 | 71,88 | 85   | 2,81 | 119  | 3,23 | 1,15 |
| glyS  | SMD_4166 | 2076 | 69,27 | 215  | 2,54 | 194  | 2,92 | 1,15 |
| RRM2  | SMD_0216 | 1020 | 60,69 | 411  | 2,17 | 415  | 2,50 | 1,15 |
| lpsJ  | SMD_0551 | 633  | 65,40 | 144  | 2,20 | 176  | 2,52 | 1,15 |
| -     | SMD_0084 | 1335 | 64,79 | 111  | 2,41 | 74   | 2,76 | 1,15 |
| -     | SMD_0992 | 567  | 63,67 | 46   | 3,74 | 56   | 4,29 | 1,15 |
| -     | SMD_1781 | 1242 | 66,18 | 26   | 2,62 | 37   | 3,00 | 1,15 |
| selD  | SMD_3453 | 1080 | 70,19 | 45   | 4,54 | 56   | 5,20 | 1,15 |
| tyrS  | SMD_0336 | 1212 | 65,51 | 171  | 2,70 | 191  | 3,10 | 1,15 |
| -     | SMD_1654 | 330  | 69,09 | 32   | 1,28 | 21   | 1,47 | 1,15 |
| flil  | SMD_2061 | 1386 | 70,06 | 51   | 1,87 | 29   | 2,14 | 1,15 |
| fdx   | SMD_1749 | 282  | 62,77 | 286  | 2,33 | 313  | 2,67 | 1,15 |
| -     | SMD_1051 | 1170 | 66,67 | 118  | 2,90 | 135  | 3,32 | 1,15 |
| rimM  | SMD_1227 | 513  | 64,13 | 579  | 2,69 | 462  | 3,08 | 1,14 |
| -     | SMD_0419 | 486  | 61,73 | 36   | 1,37 | 33   | 1,57 | 1,14 |
| -     | SMD_3632 | 597  | 69,35 | 56   | 4,09 | 83   | 4,67 | 1,14 |
| -     | SMD_1724 | 648  | 66,51 | 124  | 2,48 | 111  | 2,83 | 1,14 |
| -     | SMD_0301 | 456  | 71,27 | 69   | 2,67 | 85   | 3,05 | 1,14 |
| trmJ  | SMD_2892 | 828  | 69,57 | 94   | 3,35 | 82   | 3,83 | 1,14 |
| metG  | SMD_3080 | 2082 | 67,68 | 155  | 2,47 | 154  | 2,83 | 1,14 |
| -     | SMD_0561 | 378  | 69,58 | 168  | 2,87 | 211  | 3,28 | 1,14 |
| -     | SMD_1293 | 1179 | 70,23 | 431  | 2,94 | 449  | 3,36 | 1,14 |
| -     | SMD_3144 | 1704 | 69,13 | 38   | 2,86 | 42   | 3,26 | 1,14 |
| frr   | SMD_1334 | 555  | 61,08 | 915  | 2,29 | 833  | 2,62 | 1,14 |
| -     | SMD_1977 | 1389 | 67,03 | 55   | 2,98 | 67   | 3,40 | 1,14 |
| -     | SMD_0882 | 321  | 61,37 | 116  | 3,13 | 132  | 3,57 | 1,14 |
| -     | SMD_4063 | 750  | 66,27 | 144  | 2,93 | 151  | 3,34 | 1,14 |
| -     | SMD_3332 | 738  | 68,16 | 27   | 3,08 | 27   | 3,51 | 1,14 |
| piuC  | SMD_1068 | 678  | 67,85 | 64   | 1,78 | 55   | 2,03 | 1,14 |
| -     | SMD_0077 | 675  | 68,44 | 74   | 2,72 | 66   | 3,10 | 1,14 |
| -     | SMD_0285 | 1335 | 66,29 | 41   | 2,94 | 32   | 3,35 | 1,14 |
| -     | SMD_0887 | 1542 | 56,68 | 74   | 2,33 | 68   | 2,65 | 1,14 |
| -     | SMD_3331 | 1737 | 67,18 | 94   | 3,44 | 111  | 3,92 | 1,14 |
| ccmG  | SMD_2848 | 618  | 66,50 | 137  | 2,19 | 156  | 2,49 | 1,14 |
| dnaX  | SMD_0964 | 2067 | 69,86 | 141  | 2,70 | 157  | 3,08 | 1,14 |
| -     | SMD_4212 | 789  | 69,33 | 245  | 3,80 | 246  | 4,33 | 1,14 |
| sufA  | SMD_2730 | 339  | 68,44 | 173  | 2,97 | 171  | 3,38 | 1,14 |
| -     | SMD_1730 | 1083 | 66,85 | 43   | 3,29 | 45   | 3,74 | 1,14 |
| -     | SMD_1180 | 1215 | 67,82 | 85   | 2,77 | 99   | 3,15 | 1,14 |
| rpmB  | SMD_4132 | 204  | 60,29 | 5661 | 3,31 | 4987 | 3,77 | 1,14 |
| uvrA  | SMD_1190 | 2994 | 66,73 | 125  | 2,50 | 137  | 2,84 | 1,14 |
| -     | SMD_3858 | 432  | 72,69 | 251  | 2,62 | 238  | 2,98 | 1,14 |
| amiC  | SMD_2901 | 1569 | 71,06 | 166  | 3,93 | 211  | 4,47 | 1,14 |
| frzE  | SMD_3237 | 6732 | 68,27 | 81   | 3,63 | 46   | 4,13 | 1,14 |
| -     | SMD_3470 | 447  | 65,77 | 131  | 1,92 | 142  | 2,18 | 1,14 |
| hfIC  | SMD_3167 | 864  | 65,16 | 291  | 2,55 | 297  | 2,89 | 1,14 |
| -     | SMD_1787 | 393  | 64,63 | 352  | 3,27 | 354  | 3,71 | 1,14 |
| aas   | SMD_3878 | 1890 | 65,93 | 55   | 3,48 | 57   | 3,95 | 1,14 |
| -     | SMD_3774 | 1710 | 70,00 | 38   | 3,04 | 32   | 3,45 | 1,14 |
| glyQ  | SMD_4167 | 912  | 66,01 | 236  | 3,14 | 221  | 3,56 | 1,14 |
| -     | SMD_0961 | 1056 | 62,78 | 116  | 2,31 | 142  | 2,62 | 1,14 |
| -     | SMD_0942 | 777  | 69,11 | 133  | 2,86 | 159  | 3,25 | 1,14 |
| -     | SMD_2985 | 1878 | 68,74 | 53   | 3,35 | 54   | 3,80 | 1,14 |
| -     | SMD_3460 | 375  | 68,27 | 51   | 3,13 | 62   | 3,55 | 1,14 |
| -     | SMD_3696 | 2214 | 67,89 | 61   | 2,29 | 42   | 2,60 | 1,13 |
| ftsW  | SMD_0642 | 1326 | 65,84 | 219  | 2,04 | 213  | 2,31 | 1,13 |
| -     | SMD_1994 | 462  | 62,99 | 81   | 2,09 | 68   | 2,37 | 1,13 |
| -     | SMD_1885 | 840  | 65,48 | 11   | 2,40 | 11   | 2,73 | 1,13 |
| -     | SMD_2809 | 303  | 66,01 | 87   | 2,86 | 82   | 3,24 | 1,13 |
| -     | SMD_0609 | 450  | 69,33 | 36   | 2,72 | 32   | 3,08 | 1,13 |
| katA2 | SMD_1237 | 1644 | 65,15 | 41   | 3,18 | 51   | 3,60 | 1,13 |
| -     | SMD_0384 | 1302 | 67,74 | 16   | 2,99 | 21   | 3,39 | 1,13 |
| -     | SMD_1913 | 888  | 68,58 | 37   | 1,93 | 33   | 2,19 | 1,13 |

|       |          |      |       |      |      |      |      |      |
|-------|----------|------|-------|------|------|------|------|------|
| wzm   | SMD_0529 | 795  | 57,74 | 317  | 2,06 | 311  | 2,34 | 1,13 |
| -     | SMD_1526 | 471  | 60,08 | 199  | 2,65 | 177  | 3,00 | 1,13 |
| -     | SMD_3636 | 279  | 64,52 | 614  | 4,11 | 786  | 4,65 | 1,13 |
| smeZ  | SMD_1983 | 3150 | 68,25 | 118  | 1,98 | 49   | 2,24 | 1,13 |
| -     | SMD_3265 | 465  | 67,74 | 31   | 4,11 | 14   | 4,65 | 1,13 |
| -     | SMD_0973 | 570  | 70,18 | 38   | 2,56 | 49   | 2,90 | 1,13 |
| -     | SMD_2477 | 1149 | 64,93 | 311  | 2,95 | 317  | 3,34 | 1,13 |
| uvrD  | SMD_4127 | 2193 | 68,17 | 194  | 3,11 | 175  | 3,51 | 1,13 |
| rmlC  | SMD_0546 | 558  | 63,26 | 569  | 1,97 | 577  | 2,23 | 1,13 |
| -     | SMD_3555 | 1299 | 68,75 | 134  | 3,62 | 151  | 4,09 | 1,13 |
| psd   | SMD_3008 | 843  | 67,26 | 51   | 2,48 | 52   | 2,81 | 1,13 |
| -     | SMD_3009 | 348  | 63,22 | 227  | 2,11 | 256  | 2,39 | 1,13 |
| gidB  | SMD_4148 | 639  | 72,61 | 92   | 4,21 | 73   | 4,76 | 1,13 |
| -     | SMD_1061 | 1605 | 69,78 | 55   | 2,48 | 54   | 2,80 | 1,13 |
| -     | SMD_1802 | 597  | 67,67 | 51   | 2,74 | 53   | 3,10 | 1,13 |
| ccmB  | SMD_2843 | 696  | 69,68 | 53   | 3,38 | 42   | 3,82 | 1,13 |
| -     | SMD_0314 | 888  | 69,59 | 51   | 3,19 | 27   | 3,61 | 1,13 |
| -     | SMD_1853 | 639  | 65,88 | 388  | 2,50 | 415  | 2,82 | 1,13 |
| -     | SMD_3879 | 288  | 68,06 | 314  | 3,03 | 336  | 3,41 | 1,13 |
| aroG  | SMD_3803 | 1074 | 66,67 | 133  | 4,69 | 134  | 5,29 | 1,13 |
| yidC  | SMD_4237 | 1716 | 65,33 | 351  | 2,76 | 299  | 3,11 | 1,13 |
| serC  | SMD_2682 | 1086 | 67,50 | 127  | 3,17 | 167  | 3,57 | 1,13 |
| -     | SMD_1532 | 594  | 59,09 | 54   | 2,65 | 57   | 2,98 | 1,13 |
| -     | SMD_3842 | 630  | 67,14 | 23   | 2,72 | 17   | 3,07 | 1,13 |
| -     | SMD_3175 | 4845 | 67,22 | 57   | 2,80 | 42   | 3,15 | 1,13 |
| purH  | SMD_3847 | 1584 | 67,99 | 132  | 2,86 | 121  | 3,22 | 1,13 |
| -     | SMD_0242 | 1329 | 63,88 | 23   | 3,31 | 14   | 3,72 | 1,13 |
| -     | SMD_2810 | 162  | 64,20 | 191  | 2,44 | 119  | 2,74 | 1,12 |
| -     | SMD_3014 | 1362 | 64,90 | 144  | 3,10 | 84   | 3,48 | 1,12 |
| rfbD  | SMD_0547 | 894  | 68,57 | 313  | 2,05 | 332  | 2,31 | 1,12 |
| -     | SMD_1071 | 339  | 72,86 | 52   | 2,98 | 56   | 3,35 | 1,12 |
| cstA  | SMD_3138 | 2082 | 65,56 | 36   | 2,94 | 32   | 3,30 | 1,12 |
| uvrC  | SMD_1471 | 1845 | 68,94 | 55   | 1,90 | 72   | 2,14 | 1,12 |
| -     | SMD_1852 | 855  | 71,93 | 163  | 2,64 | 164  | 2,97 | 1,12 |
| -     | SMD_1006 | 2022 | 65,68 | 55   | 2,78 | 47   | 3,13 | 1,12 |
| bfr3  | SMD_1355 | 489  | 63,80 | 141  | 2,41 | 193  | 2,71 | 1,12 |
| htpX  | SMD_2894 | 867  | 65,63 | 121  | 3,61 | 186  | 4,06 | 1,12 |
| -     | SMD_1973 | 1428 | 66,32 | 57   | 1,87 | 56   | 2,09 | 1,12 |
| -     | SMD_3088 | 1152 | 68,84 | 52   | 2,97 | 61   | 3,33 | 1,12 |
| hrpA  | SMD_3253 | 4083 | 68,72 | 57   | 2,87 | 61   | 3,22 | 1,12 |
| -     | SMD_3309 | 519  | 65,13 | 2463 | 2,14 | 1992 | 2,40 | 1,12 |
| rdgC  | SMD_0059 | 906  | 64,79 | 261  | 2,77 | 278  | 3,10 | 1,12 |
| -     | SMD_3147 | 1965 | 64,73 | 159  | 2,36 | 119  | 2,64 | 1,12 |
| -     | SMD_3223 | 495  | 60,20 | 378  | 2,60 | 431  | 2,91 | 1,12 |
| -     | SMD_2686 | 1005 | 70,15 | 33   | 4,76 | 41   | 5,32 | 1,12 |
| carB  | SMD_2000 | 3243 | 65,90 | 317  | 2,11 | 279  | 2,36 | 1,12 |
| -     | SMD_1666 | 375  | 66,67 | 151  | 2,13 | 121  | 2,38 | 1,12 |
| ribA  | SMD_3768 | 1113 | 70,44 | 39   | 3,01 | 72   | 3,37 | 1,12 |
| virD4 | SMD_2641 | 1680 | 62,62 | 74   | 3,11 | 81   | 3,48 | 1,12 |
| -     | SMD_2789 | 216  | 65,74 | 95   | 3,68 | 132  | 4,12 | 1,12 |
| cheZ  | SMD_2044 | 606  | 70,30 | 159  | 1,75 | 94   | 1,96 | 1,12 |
| mutL  | SMD_2900 | 1905 | 68,56 | 111  | 3,94 | 115  | 4,40 | 1,12 |
| -     | SMD_0812 | 2124 | 66,48 | 31   | 3,12 | 31   | 3,48 | 1,12 |
| serA  | SMD_1976 | 1242 | 66,67 | 79   | 2,80 | 91   | 3,12 | 1,12 |
| -     | SMD_3622 | 486  | 70,37 | 82   | 3,64 | 83   | 4,06 | 1,12 |
| rnhA  | SMD_0936 | 453  | 66,00 | 174  | 2,94 | 216  | 3,28 | 1,12 |
| pilZ  | SMD_0986 | 354  | 68,08 | 112  | 2,83 | 117  | 3,16 | 1,12 |
| -     | SMD_1007 | 1422 | 69,90 | 12   | 2,66 | 17   | 2,97 | 1,12 |
| -     | SMD_3252 | 525  | 67,05 | 63   | 2,75 | 85   | 3,07 | 1,12 |
| sdhA  | SMD_1734 | 1791 | 66,72 | 851  | 2,22 | 853  | 2,47 | 1,12 |
| mutX  | SMD_2610 | 489  | 66,26 | 95   | 2,85 | 99   | 3,18 | 1,11 |
| leuC  | SMD_3522 | 1419 | 69,34 | 13   | 2,59 | 18   | 2,89 | 1,11 |
| -     | SMD_0596 | 729  | 68,18 | 653  | 3,39 | 516  | 3,77 | 1,11 |
| rlmI  | SMD_4230 | 1170 | 64,79 | 426  | 2,97 | 419  | 3,31 | 1,11 |
| -     | SMD_2574 | 714  | 72,55 | 8    | 7,96 | 3    | 8,86 | 1,11 |



|      |          |      |       |     |      |     |      |      |
|------|----------|------|-------|-----|------|-----|------|------|
| argC | SMD_2869 | 954  | 68,03 | 51  | 2,16 | 46  | 2,40 | 1,11 |
| -    | SMD_4164 | 3858 | 69,10 | 86  | 2,20 | 91  | 2,45 | 1,11 |
| -    | SMD_2890 | 2127 | 68,31 | 39  | 3,21 | 27  | 3,57 | 1,11 |
| -    | SMD_4077 | 906  | 69,54 | 33  | 7,60 | 32  | 8,45 | 1,11 |
| atpB | SMD_3704 | 801  | 60,80 | 742 | 3,60 | 887 | 4,01 | 1,11 |
| -    | SMD_2671 | 2754 | 65,50 | 41  | 2,63 | 42  | 2,92 | 1,11 |
| -    | SMD_4169 | 747  | 72,02 | 38  | 3,62 | 55  | 4,03 | 1,11 |
| -    | SMD_3603 | 1986 | 69,99 | 57  | 3,59 | 68  | 4,00 | 1,11 |
| mraY | SMD_0641 | 1086 | 64,73 | 212 | 1,90 | 217 | 2,11 | 1,11 |
| gyrA | SMD_2717 | 2727 | 64,54 | 488 | 2,67 | 459 | 2,97 | 1,11 |
| -    | SMD_0128 | 666  | 65,77 | 41  | 4,28 | 42  | 4,76 | 1,11 |
| -    | SMD_2898 | 963  | 68,22 | 62  | 2,48 | 57  | 2,75 | 1,11 |
| hemE | SMD_3191 | 1074 | 70,30 | 115 | 3,20 | 91  | 3,56 | 1,11 |
| -    | SMD_2374 | 1374 | 70,23 | 15  | 2,77 | 8   | 3,07 | 1,11 |
| prpE | SMD_0821 | 1881 | 66,24 | 63  | 2,61 | 75  | 2,89 | 1,11 |
| mltD | SMD_3010 | 1611 | 69,21 | 146 | 2,53 | 143 | 2,80 | 1,11 |
| -    | SMD_3019 | 2166 | 65,28 | 17  | 3,22 | 11  | 3,57 | 1,11 |
| -    | SMD_0117 | 867  | 68,51 | 126 | 3,62 | 129 | 4,01 | 1,11 |
| -    | SMD_3254 | 549  | 64,12 | 272 | 3,59 | 445 | 3,98 | 1,11 |
| -    | SMD_0456 | 687  | 67,39 | 719 | 2,03 | 325 | 2,25 | 1,11 |
| lolA | SMD_2115 | 639  | 66,04 | 179 | 2,21 | 162 | 2,45 | 1,11 |
| -    | SMD_2621 | 438  | 67,81 | 78  | 2,70 | 74  | 2,99 | 1,11 |
| -    | SMD_0832 | 336  | 63,10 | 198 | 2,06 | 219 | 2,29 | 1,11 |
| -    | SMD_3341 | 894  | 66,78 | 38  | 2,74 | 37  | 3,04 | 1,11 |
| -    | SMD_2663 | 1323 | 64,55 | 74  | 2,56 | 75  | 2,84 | 1,11 |
| -    | SMD_0893 | 237  | 55,27 | 215 | 1,48 | 214 | 1,64 | 1,11 |
| cadA | SMD_1565 | 2913 | 65,67 | 25  | 2,10 | 41  | 2,33 | 1,11 |
| -    | SMD_2271 | 696  | 69,68 | 55  | 2,86 | 53  | 3,16 | 1,11 |
| dapF | SMD_3665 | 852  | 69,25 | 215 | 2,82 | 254 | 3,12 | 1,11 |
| hslV | SMD_3662 | 552  | 66,67 | 95  | 2,68 | 229 | 2,96 | 1,11 |
| -    | SMD_3482 | 684  | 71,64 | 49  | 2,51 | 42  | 2,78 | 1,10 |
| -    | SMD_0834 | 696  | 64,94 | 243 | 3,36 | 214 | 3,72 | 1,10 |
| -    | SMD_3633 | 2178 | 67,17 | 159 | 3,07 | 188 | 3,39 | 1,10 |
| crp  | SMD_3900 | 666  | 66,82 | 399 | 3,11 | 425 | 3,44 | 1,10 |
| -    | SMD_3647 | 939  | 64,64 | 191 | 3,52 | 197 | 3,89 | 1,10 |
| -    | SMD_3922 | 543  | 71,82 | 18  | 2,12 | 21  | 2,35 | 1,10 |
| cyoE | SMD_0367 | 894  | 64,77 | 125 | 2,78 | 124 | 3,07 | 1,10 |
| pth  | SMD_0757 | 579  | 65,63 | 282 | 2,28 | 275 | 2,52 | 1,10 |
| -    | SMD_3423 | 1026 | 70,96 | 81  | 3,77 | 111 | 4,16 | 1,10 |
| priA | SMD_3793 | 2178 | 70,25 | 54  | 3,59 | 64  | 3,96 | 1,10 |
| kbl  | SMD_0833 | 1257 | 64,68 | 161 | 2,70 | 171 | 2,98 | 1,10 |
| -    | SMD_0445 | 777  | 70,14 | 23  | 3,50 | 24  | 3,86 | 1,10 |
| -    | SMD_2996 | 5388 | 67,48 | 42  | 2,36 | 24  | 2,60 | 1,10 |
| smeP | SMD_3527 | 3162 | 65,91 | 33  | 2,85 | 33  | 3,14 | 1,10 |
| nudH | SMD_3892 | 621  | 69,24 | 133 | 3,11 | 144 | 3,43 | 1,10 |
| recN | SMD_1791 | 1662 | 70,10 | 71  | 2,89 | 75  | 3,19 | 1,10 |
| -    | SMD_3714 | 795  | 64,91 | 131 | 2,68 | 171 | 2,95 | 1,10 |
| mfd  | SMD_1271 | 3465 | 68,34 | 161 | 2,56 | 152 | 2,83 | 1,10 |
| feoB | SMD_1992 | 1866 | 68,86 | 94  | 2,36 | 91  | 2,60 | 1,10 |
| -    | SMD_3539 | 3345 | 69,39 | 43  | 2,44 | 57  | 2,69 | 1,10 |
| murG | SMD_0643 | 1089 | 71,17 | 137 | 2,09 | 149 | 2,30 | 1,10 |
| tesA | SMD_0683 | 1314 | 69,94 | 27  | 3,67 | 31  | 4,05 | 1,10 |
| -    | SMD_1203 | 957  | 67,08 | 53  | 2,45 | 44  | 2,70 | 1,10 |
| astC | SMD_3477 | 1227 | 68,70 | 212 | 2,84 | 251 | 3,13 | 1,10 |
| pilW | SMD_1449 | 1170 | 67,44 | 41  | 3,09 | 29  | 3,41 | 1,10 |
| fabH | SMD_0175 | 1017 | 64,70 | 413 | 3,31 | 356 | 3,64 | 1,10 |
| lpxA | SMD_1326 | 792  | 67,05 | 314 | 2,22 | 314 | 2,44 | 1,10 |
| dadA | SMD_0483 | 1305 | 69,04 | 227 | 3,52 | 257 | 3,87 | 1,10 |
| -    | SMD_3625 | 1512 | 66,87 | 117 | 2,70 | 149 | 2,98 | 1,10 |
| -    | SMD_1441 | 342  | 68,42 | 79  | 2,53 | 91  | 2,78 | 1,10 |
| -    | SMD_1979 | 1770 | 69,77 | 56  | 2,43 | 62  | 2,67 | 1,10 |
| pgi  | SMD_1719 | 1515 | 67,39 | 231 | 2,46 | 261 | 2,71 | 1,10 |
| -    | SMD_0286 | 906  | 69,09 | 51  | 4,93 | 54  | 5,43 | 1,10 |
| yciL | SMD_2833 | 300  | 71,67 | 172 | 2,14 | 179 | 2,35 | 1,10 |
| -    | SMD_1963 | 3075 | 64,20 | 264 | 2,55 | 182 | 2,80 | 1,10 |

|       |          |      |       |      |      |      |      |      |
|-------|----------|------|-------|------|------|------|------|------|
| -     | SMD_3481 | 819  | 67,64 | 47   | 2,89 | 51   | 3,18 | 1,10 |
| potG  | SMD_1412 | 1137 | 65,44 | 138  | 2,24 | 143  | 2,46 | 1,10 |
| pilC  | SMD_3360 | 1224 | 59,72 | 115  | 2,88 | 89   | 3,17 | 1,10 |
| -     | SMD_4046 | 249  | 69,08 | 71   | 2,81 | 68   | 3,08 | 1,10 |
| -     | SMD_1663 | 615  | 64,23 | 194  | 2,32 | 241  | 2,54 | 1,10 |
| -     | SMD_0534 | 1308 | 57,42 | 221  | 2,05 | 216  | 2,25 | 1,10 |
| hel   | SMD_0053 | 924  | 69,48 | 221  | 2,64 | 171  | 2,90 | 1,10 |
| -     | SMD_2475 | 564  | 71,81 | 52   | 3,11 | 49   | 3,41 | 1,10 |
| ahpC  | SMD_0720 | 564  | 62,59 | 735  | 4,72 | 896  | 5,18 | 1,10 |
| -     | SMD_1090 | 1353 | 66,22 | 178  | 2,05 | 191  | 2,25 | 1,10 |
| -     | SMD_0885 | 1749 | 56,03 | 172  | 2,16 | 163  | 2,37 | 1,10 |
| -     | SMD_0227 | 1893 | 68,78 | 17   | 7,05 | 15   | 7,73 | 1,10 |
| -     | SMD_0413 | 369  | 65,58 | 19   | 1,73 | 7    | 1,90 | 1,10 |
| gcvT  | SMD_3225 | 1113 | 68,01 | 241  | 2,47 | 222  | 2,70 | 1,10 |
| -     | SMD_3650 | 1815 | 65,29 | 215  | 2,45 | 212  | 2,69 | 1,10 |
| -     | SMD_1965 | 1050 | 69,33 | 129  | 2,12 | 112  | 2,32 | 1,10 |
| -     | SMD_3885 | 465  | 65,81 | 85   | 2,54 | 85   | 2,78 | 1,10 |
| -     | SMD_4201 | 1470 | 68,57 | 152  | 2,45 | 131  | 2,68 | 1,09 |
| -     | SMD_1073 | 540  | 69,07 | 137  | 2,87 | 156  | 3,14 | 1,09 |
| smmJ2 | SMD_2141 | 1545 | 64,92 | 91   | 1,86 | 124  | 2,03 | 1,09 |
| -     | SMD_1025 | 789  | 69,46 | 23   | 4,77 | 17   | 5,21 | 1,09 |
| mraW  | SMD_0636 | 969  | 68,63 | 211  | 3,05 | 292  | 3,34 | 1,09 |
| batA  | SMD_3420 | 1005 | 69,95 | 31   | 2,56 | 45   | 2,80 | 1,09 |
| -     | SMD_3250 | 1566 | 72,16 | 38   | 2,74 | 36   | 2,99 | 1,09 |
| -     | SMD_3366 | 864  | 65,74 | 39   | 2,89 | 48   | 3,16 | 1,09 |
| -     | SMD_4158 | 3459 | 68,83 | 24   | 2,59 | 23   | 2,83 | 1,09 |
| -     | SMD_0459 | 1260 | 68,10 | 12   | 2,58 | 14   | 2,82 | 1,09 |
| lpxB  | SMD_1325 | 1260 | 69,52 | 225  | 2,38 | 214  | 2,60 | 1,09 |
| rnE   | SMD_2823 | 3258 | 68,35 | 267  | 2,48 | 276  | 2,71 | 1,09 |
| mutS  | SMD_1238 | 2592 | 68,06 | 62   | 3,18 | 51   | 3,47 | 1,09 |
| htpG  | SMD_1745 | 1893 | 65,40 | 118  | 2,42 | 314  | 2,65 | 1,09 |
| gst   | SMD_0824 | 612  | 68,14 | 83   | 2,96 | 117  | 3,23 | 1,09 |
| cdsA  | SMD_1332 | 837  | 68,94 | 257  | 2,40 | 223  | 2,62 | 1,09 |
| -     | SMD_2631 | 741  | 57,89 | 251  | 1,75 | 319  | 1,91 | 1,09 |
| -     | SMD_4087 | 3339 | 73,47 | 115  | 3,10 | 116  | 3,38 | 1,09 |
| -     | SMD_2683 | 744  | 72,04 | 186  | 3,90 | 173  | 4,26 | 1,09 |
| lpxH  | SMD_0845 | 747  | 67,20 | 191  | 3,81 | 177  | 4,15 | 1,09 |
| ribB  | SMD_0616 | 1101 | 69,12 | 48   | 3,20 | 38   | 3,49 | 1,09 |
| accD  | SMD_2989 | 876  | 66,10 | 412  | 2,43 | 419  | 2,65 | 1,09 |
| -     | SMD_2765 | 1029 | 66,28 | 57   | 2,37 | 58   | 2,58 | 1,09 |
| asnB  | SMD_1352 | 1692 | 67,20 | 28   | 3,35 | 35   | 3,65 | 1,09 |
| leuB  | SMD_3524 | 1068 | 68,54 | 31   | 2,21 | 35   | 2,40 | 1,09 |
| -     | SMD_0085 | 1635 | 65,38 | 91   | 2,38 | 88   | 2,59 | 1,09 |
| -     | SMD_0531 | 1491 | 61,44 | 461  | 2,25 | 521  | 2,45 | 1,09 |
| -     | SMD_2114 | 1944 | 67,80 | 127  | 2,09 | 135  | 2,28 | 1,09 |
| groES | SMD_3814 | 288  | 64,24 | 1217 | 3,46 | 4639 | 3,77 | 1,09 |
| rpsI  | SMD_3895 | 393  | 65,14 | 2971 | 2,40 | 2548 | 2,62 | 1,09 |
| dnaE  | SMD_1323 | 3591 | 66,86 | 159  | 2,40 | 142  | 2,61 | 1,09 |
| nuoK  | SMD_2970 | 306  | 61,44 | 872  | 1,92 | 841  | 2,09 | 1,09 |
| lctR  | SMD_2545 | 765  | 70,07 | 21   | 2,35 | 25   | 2,55 | 1,09 |
| manA  | SMD_0548 | 1404 | 66,67 | 193  | 2,12 | 219  | 2,30 | 1,09 |
| murB  | SMD_1914 | 1062 | 67,42 | 85   | 1,94 | 117  | 2,11 | 1,09 |
| aspS  | SMD_3323 | 1752 | 66,50 | 258  | 2,89 | 251  | 3,15 | 1,09 |
| rpoD  | SMD_3765 | 1854 | 62,24 | 658  | 2,69 | 592  | 2,92 | 1,09 |
| nbaC  | SMD_2736 | 531  | 65,35 | 72   | 2,06 | 85   | 2,24 | 1,09 |
| -     | SMD_3418 | 1716 | 70,86 | 26   | 2,62 | 29   | 2,84 | 1,09 |
| cydC  | SMD_2853 | 1680 | 70,83 | 98   | 2,16 | 94   | 2,35 | 1,09 |
| -     | SMD_0613 | 885  | 67,57 | 152  | 2,96 | 111  | 3,21 | 1,09 |
| ex7L  | SMD_2905 | 1332 | 69,82 | 68   | 2,79 | 64   | 3,03 | 1,09 |
| -     | SMD_3161 | 2124 | 67,00 | 131  | 3,05 | 52   | 3,31 | 1,09 |
| surE  | SMD_1661 | 807  | 66,29 | 282  | 2,99 | 311  | 3,24 | 1,08 |
| -     | SMD_0614 | 621  | 66,67 | 232  | 4,02 | 95   | 4,37 | 1,08 |
| -     | SMD_0007 | 1194 | 63,23 | 1134 | 2,96 | 1189 | 3,21 | 1,08 |
| -     | SMD_0766 | 1017 | 67,85 | 23   | 3,11 | 31   | 3,38 | 1,08 |
| pheA  | SMD_2681 | 1200 | 66,08 | 153  | 2,63 | 173  | 2,85 | 1,08 |

|      |          |      |       |     |      |     |      |      |
|------|----------|------|-------|-----|------|-----|------|------|
| pdhA | SMD_3930 | 1083 | 65,65 | 511 | 2,31 | 482 | 2,50 | 1,08 |
| guaA | SMD_1861 | 1566 | 64,56 | 148 | 2,02 | 134 | 2,19 | 1,08 |
| sbcB | SMD_2739 | 1440 | 68,68 | 62  | 2,31 | 67  | 2,50 | 1,08 |
| -    | SMD_2994 | 1110 | 66,67 | 68  | 2,41 | 57  | 2,61 | 1,08 |
| -    | SMD_1801 | 1773 | 69,37 | 29  | 2,83 | 34  | 3,07 | 1,08 |
| -    | SMD_4101 | 771  | 68,09 | 62  | 2,76 | 53  | 2,99 | 1,08 |
| phoA | SMD_3044 | 1707 | 68,72 | 87  | 2,31 | 82  | 2,51 | 1,08 |
| speA | SMD_3951 | 1890 | 66,61 | 184 | 2,75 | 171 | 2,98 | 1,08 |
| yjjV | SMD_2790 | 774  | 69,90 | 81  | 3,34 | 111 | 3,61 | 1,08 |
| -    | SMD_2637 | 1254 | 65,63 | 157 | 2,32 | 188 | 2,51 | 1,08 |
| -    | SMD_3083 | 348  | 64,66 | 376 | 2,84 | 384 | 3,07 | 1,08 |
| -    | SMD_2787 | 543  | 68,51 | 53  | 3,41 | 57  | 3,69 | 1,08 |
| coaD | SMD_1747 | 510  | 67,65 | 243 | 2,86 | 231 | 3,10 | 1,08 |
| -    | SMD_0094 | 2058 | 68,80 | 61  | 3,52 | 65  | 3,80 | 1,08 |
| glmM | SMD_2988 | 1362 | 68,80 | 279 | 2,46 | 286 | 2,66 | 1,08 |
| grpE | SMD_1793 | 516  | 68,41 | 213 | 2,20 | 421 | 2,38 | 1,08 |
| mrcB | SMD_3248 | 2439 | 69,25 | 95  | 2,89 | 111 | 3,12 | 1,08 |
| -    | SMD_1796 | 798  | 69,17 | 17  | 1,31 | 21  | 1,42 | 1,08 |
| -    | SMD_0205 | 1983 | 69,64 | 217 | 2,17 | 191 | 2,34 | 1,08 |
| -    | SMD_4144 | 966  | 67,70 | 83  | 3,65 | 83  | 3,95 | 1,08 |
| -    | SMD_0535 | 624  | 53,85 | 482 | 1,75 | 486 | 1,89 | 1,08 |
| -    | SMD_0410 | 798  | 68,80 | 27  | 3,62 | 27  | 3,91 | 1,08 |
| ppk  | SMD_0850 | 2058 | 67,10 | 36  | 3,03 | 51  | 3,27 | 1,08 |
| yrbG | SMD_3920 | 960  | 70,52 | 37  | 3,06 | 32  | 3,30 | 1,08 |
| -    | SMD_2531 | 1509 | 66,14 | 17  | 2,90 | 19  | 3,13 | 1,08 |
| -    | SMD_1814 | 2070 | 68,60 | 67  | 2,62 | 71  | 2,83 | 1,08 |
| ppc  | SMD_0666 | 2736 | 69,41 | 29  | 2,96 | 35  | 3,20 | 1,08 |
| eno  | SMD_1655 | 1293 | 64,35 | 383 | 2,60 | 418 | 2,81 | 1,08 |
| aspC | SMD_0018 | 1203 | 66,58 | 229 | 2,92 | 254 | 3,16 | 1,08 |
| -    | SMD_4215 | 669  | 66,67 | 313 | 2,63 | 294 | 2,84 | 1,08 |
| ahpF | SMD_0719 | 1593 | 66,79 | 55  | 3,58 | 79  | 3,86 | 1,08 |
| -    | SMD_3514 | 1719 | 65,79 | 22  | 3,65 | 18  | 3,94 | 1,08 |
| leuS | SMD_3066 | 2694 | 66,96 | 366 | 2,86 | 344 | 3,08 | 1,08 |
| -    | SMD_0710 | 561  | 68,09 | 78  | 2,57 | 114 | 2,77 | 1,08 |
| kdsA | SMD_1652 | 831  | 65,58 | 212 | 2,64 | 243 | 2,85 | 1,08 |
| nuoB | SMD_2979 | 549  | 65,03 | 793 | 2,73 | 763 | 2,95 | 1,08 |
| -    | SMD_0836 | 2166 | 66,30 | 215 | 2,26 | 159 | 2,43 | 1,08 |
| -    | SMD_2541 | 297  | 67,34 | 255 | 2,64 | 327 | 2,84 | 1,08 |
| pyrH | SMD_1335 | 729  | 67,63 | 291 | 2,49 | 313 | 2,68 | 1,08 |
| recA | SMD_1678 | 1038 | 63,39 | 534 | 2,71 | 564 | 2,91 | 1,08 |
| dld  | SMD_2543 | 1701 | 67,72 | 29  | 1,93 | 36  | 2,08 | 1,08 |
| -    | SMD_0208 | 618  | 71,68 | 23  | 2,41 | 22  | 2,59 | 1,08 |
| -    | SMD_1015 | 984  | 68,39 | 28  | 3,04 | 22  | 3,27 | 1,08 |
| -    | SMD_2021 | 1551 | 66,34 | 14  | 2,07 | 11  | 2,22 | 1,08 |
| glnD | SMD_1346 | 2628 | 69,25 | 118 | 2,44 | 116 | 2,63 | 1,08 |
| aroH | SMD_0813 | 1392 | 66,31 | 82  | 3,43 | 89  | 3,68 | 1,08 |
| RRM1 | SMD_0215 | 2403 | 64,25 | 451 | 2,87 | 433 | 3,09 | 1,08 |
| -    | SMD_4036 | 573  | 68,76 | 412 | 3,14 | 414 | 3,37 | 1,07 |
| -    | SMD_0016 | 711  | 64,14 | 111 | 3,05 | 81  | 3,28 | 1,07 |
| holA | SMD_3064 | 1038 | 71,19 | 137 | 2,99 | 139 | 3,22 | 1,07 |
| -    | SMD_2737 | 1275 | 69,10 | 66  | 2,64 | 75  | 2,83 | 1,07 |
| -    | SMD_0255 | 768  | 67,84 | 11  | 2,81 | 5   | 3,02 | 1,07 |
| -    | SMD_0093 | 618  | 69,42 | 37  | 3,94 | 56  | 4,23 | 1,07 |
| pheT | SMD_2947 | 2382 | 70,53 | 161 | 2,51 | 149 | 2,69 | 1,07 |
| -    | SMD_3319 | 732  | 65,30 | 479 | 2,51 | 486 | 2,69 | 1,07 |
| emrB | SMD_1361 | 1488 | 65,26 | 62  | 2,49 | 156 | 2,67 | 1,07 |
| -    | SMD_0563 | 504  | 74,60 | 111 | 3,76 | 113 | 4,04 | 1,07 |
| -    | SMD_3385 | 1422 | 69,55 | 79  | 2,96 | 83  | 3,18 | 1,07 |
| -    | SMD_4017 | 633  | 68,09 | 68  | 3,14 | 74  | 3,37 | 1,07 |
| rbfA | SMD_2961 | 384  | 65,10 | 198 | 2,23 | 171 | 2,39 | 1,07 |
| -    | SMD_2829 | 1605 | 64,80 | 35  | 2,52 | 38  | 2,71 | 1,07 |
| tolB | SMD_3310 | 1320 | 66,82 | 278 | 2,36 | 435 | 2,53 | 1,07 |
| nuoL | SMD_2969 | 2175 | 62,94 | 927 | 1,80 | 811 | 1,92 | 1,07 |
| -    | SMD_2812 | 1566 | 64,94 | 175 | 2,45 | 164 | 2,63 | 1,07 |
| rubA | SMD_3472 | 192  | 66,15 | 111 | 2,96 | 127 | 3,17 | 1,07 |

|       |          |      |       |      |      |      |      |      |
|-------|----------|------|-------|------|------|------|------|------|
| rsmE  | SMD_3232 | 738  | 69,78 | 82   | 2,57 | 76   | 2,76 | 1,07 |
| -     | SMD_0333 | 231  | 70,13 | 76   | 3,44 | 48   | 3,68 | 1,07 |
| kup   | SMD_3316 | 1920 | 65,52 | 75   | 2,47 | 66   | 2,65 | 1,07 |
| -     | SMD_3773 | 1257 | 69,21 | 134  | 3,20 | 157  | 3,43 | 1,07 |
| -     | SMD_1740 | 450  | 66,22 | 41   | 2,70 | 41   | 2,89 | 1,07 |
| cheA  | SMD_2036 | 1989 | 68,63 | 132  | 2,30 | 73   | 2,47 | 1,07 |
| rplM  | SMD_3896 | 429  | 62,94 | 4361 | 2,33 | 3541 | 2,49 | 1,07 |
| rplT  | SMD_2949 | 360  | 61,94 | 3739 | 2,29 | 3367 | 2,45 | 1,07 |
| -     | SMD_4236 | 2673 | 67,15 | 33   | 3,17 | 28   | 3,39 | 1,07 |
| -     | SMD_1221 | 450  | 67,56 | 89   | 2,19 | 82   | 2,34 | 1,07 |
| secA  | SMD_0651 | 2733 | 65,02 | 296  | 2,60 | 357  | 2,78 | 1,07 |
| folP  | SMD_1671 | 897  | 68,90 | 74   | 2,49 | 81   | 2,67 | 1,07 |
| glnA  | SMD_0103 | 1410 | 63,19 | 39   | 3,71 | 86   | 3,97 | 1,07 |
| -     | SMD_0097 | 1035 | 68,99 | 68   | 3,53 | 78   | 3,78 | 1,07 |
| potI  | SMD_1414 | 843  | 67,02 | 87   | 2,44 | 64   | 2,61 | 1,07 |
| pncB  | SMD_0593 | 1182 | 65,65 | 113  | 3,59 | 111  | 3,84 | 1,07 |
| rhlE  | SMD_0517 | 1434 | 70,08 | 455  | 5,70 | 228  | 6,09 | 1,07 |
| nuoA  | SMD_2980 | 357  | 57,70 | 1124 | 3,35 | 939  | 3,58 | 1,07 |
| rsuA  | SMD_0490 | 702  | 67,66 | 149  | 2,79 | 134  | 2,98 | 1,07 |
| -     | SMD_4030 | 1617 | 70,62 | 45   | 2,59 | 38   | 2,77 | 1,07 |
| valS  | SMD_0566 | 2829 | 66,42 | 211  | 2,33 | 212  | 2,49 | 1,07 |
| -     | SMD_4193 | 1248 | 71,63 | 46   | 4,03 | 53   | 4,30 | 1,07 |
| -     | SMD_1256 | 384  | 67,45 | 187  | 2,87 | 78   | 3,06 | 1,07 |
| -     | SMD_2909 | 2295 | 64,92 | 211  | 2,83 | 117  | 3,02 | 1,07 |
| -     | SMD_4141 | 1773 | 66,61 | 69   | 3,34 | 59   | 3,56 | 1,07 |
| -     | SMD_1040 | 231  | 69,70 | 219  | 2,56 | 241  | 2,73 | 1,07 |
| xpsH  | SMD_0583 | 495  | 72,32 | 32   | 2,71 | 26   | 2,89 | 1,07 |
| tktA  | SMD_3416 | 1998 | 67,02 | 378  | 2,36 | 328  | 2,52 | 1,06 |
| prs   | SMD_0755 | 963  | 65,32 | 366  | 3,48 | 447  | 3,70 | 1,06 |
| -     | SMD_3208 | 411  | 64,96 | 81   | 2,67 | 99   | 2,84 | 1,06 |
| -     | SMD_3383 | 717  | 69,87 | 45   | 3,16 | 61   | 3,36 | 1,06 |
| -     | SMD_3045 | 540  | 69,81 | 61   | 1,60 | 58   | 1,70 | 1,06 |
| wxocA | SMD_0532 | 3369 | 63,40 | 513  | 2,09 | 516  | 2,23 | 1,06 |
| zupT  | SMD_2821 | 810  | 64,20 | 51   | 2,65 | 53   | 2,82 | 1,06 |
| folC  | SMD_0838 | 1272 | 71,38 | 76   | 2,80 | 67   | 2,97 | 1,06 |
| ssb   | SMD_1108 | 576  | 66,67 | 398  | 2,47 | 376  | 2,62 | 1,06 |
| -     | SMD_2142 | 2325 | 66,71 | 114  | 2,16 | 154  | 2,30 | 1,06 |
| trpS  | SMD_0280 | 1296 | 66,98 | 246  | 3,12 | 211  | 3,32 | 1,06 |
| nadE  | SMD_3353 | 1635 | 68,44 | 131  | 2,85 | 135  | 3,02 | 1,06 |
| -     | SMD_2759 | 1350 | 65,63 | 595  | 2,26 | 565  | 2,40 | 1,06 |
| -     | SMD_1784 | 432  | 68,06 | 67   | 4,04 | 72   | 4,29 | 1,06 |
| -     | SMD_3758 | 2262 | 60,52 | 14   | 3,35 | 14   | 3,56 | 1,06 |
| maeB  | SMD_3541 | 2292 | 65,40 | 541  | 2,55 | 546  | 2,70 | 1,06 |
| lpdA  | SMD_3708 | 1803 | 67,05 | 341  | 2,40 | 357  | 2,54 | 1,06 |
| fliA  | SMD_2046 | 747  | 68,54 | 96   | 2,23 | 58   | 2,37 | 1,06 |
| panE  | SMD_3787 | 777  | 65,89 | 67   | 3,10 | 61   | 3,29 | 1,06 |
| folD  | SMD_1858 | 879  | 70,53 | 91   | 2,76 | 92   | 2,93 | 1,06 |
| pyrC  | SMD_2882 | 1347 | 66,74 | 119  | 2,61 | 162  | 2,77 | 1,06 |
| mreB  | SMD_3646 | 1047 | 67,05 | 219  | 3,21 | 238  | 3,40 | 1,06 |
| ftsQ  | SMD_0646 | 750  | 68,00 | 215  | 1,89 | 233  | 2,01 | 1,06 |
| ftsB  | SMD_1656 | 354  | 65,25 | 448  | 2,46 | 465  | 2,61 | 1,06 |
| -     | SMD_0251 | 579  | 64,08 | 16   | 2,61 | 7    | 2,77 | 1,06 |
| fabG  | SMD_0979 | 744  | 65,73 | 639  | 2,72 | 588  | 2,89 | 1,06 |
| -     | SMD_1158 | 636  | 69,03 | 231  | 6,17 | 247  | 6,54 | 1,06 |
| -     | SMD_3959 | 435  | 62,99 | 41   | 3,10 | 25   | 3,28 | 1,06 |
| thyA  | SMD_0694 | 795  | 65,03 | 161  | 2,72 | 174  | 2,88 | 1,06 |
| rmlA  | SMD_0545 | 888  | 64,30 | 551  | 2,19 | 542  | 2,32 | 1,06 |
| -     | SMD_1751 | 837  | 64,99 | 68   | 2,60 | 155  | 2,75 | 1,06 |
| -     | SMD_1980 | 1077 | 68,99 | 34   | 2,44 | 41   | 2,59 | 1,06 |
| acnA  | SMD_3180 | 2619 | 66,93 | 116  | 2,13 | 85   | 2,26 | 1,06 |
| sdhD  | SMD_1733 | 387  | 67,18 | 594  | 2,73 | 571  | 2,90 | 1,06 |
| cydD  | SMD_2854 | 1746 | 71,71 | 97   | 3,17 | 98   | 3,36 | 1,06 |
| gpmA  | SMD_1268 | 750  | 67,47 | 237  | 3,09 | 199  | 3,27 | 1,06 |
| iunH  | SMD_3440 | 939  | 67,20 | 193  | 2,74 | 213  | 2,90 | 1,06 |
| bioF  | SMD_4013 | 1224 | 71,49 | 66   | 3,06 | 53   | 3,24 | 1,06 |

|       |          |      |       |      |      |      |      |      |
|-------|----------|------|-------|------|------|------|------|------|
| -     | SMD_3626 | 441  | 63,95 | 171  | 2,87 | 223  | 3,03 | 1,06 |
| -     | SMD_3051 | 588  | 69,05 | 194  | 2,29 | 132  | 2,42 | 1,06 |
| phaE  | SMD_3917 | 507  | 65,48 | 54   | 2,50 | 44   | 2,64 | 1,06 |
| hflK  | SMD_3168 | 1134 | 68,78 | 298  | 3,06 | 338  | 3,24 | 1,06 |
| pyrE  | SMD_0330 | 660  | 67,27 | 371  | 2,35 | 365  | 2,49 | 1,06 |
| purA  | SMD_3164 | 1293 | 66,13 | 362  | 3,36 | 337  | 3,56 | 1,06 |
| -     | SMD_2346 | 2286 | 65,40 | 16   | 2,73 | 22   | 2,89 | 1,06 |
| -     | SMD_0350 | 1302 | 70,89 | 92   | 3,75 | 86   | 3,97 | 1,06 |
| -     | SMD_1204 | 2799 | 69,85 | 15   | 2,93 | 19   | 3,10 | 1,06 |
| -     | SMD_3932 | 354  | 66,10 | 416  | 2,07 | 412  | 2,18 | 1,06 |
| ccmF  | SMD_2847 | 1920 | 69,06 | 44   | 2,49 | 53   | 2,63 | 1,06 |
| pilX  | SMD_1450 | 522  | 65,71 | 63   | 2,33 | 42   | 2,46 | 1,06 |
| -     | SMD_4133 | 1215 | 69,38 | 21   | 4,38 | 16   | 4,63 | 1,06 |
| nudF  | SMD_0728 | 555  | 67,03 | 84   | 2,71 | 84   | 2,86 | 1,06 |
| rpsG  | SMD_0781 | 474  | 61,18 | 4212 | 2,04 | 3711 | 2,16 | 1,06 |
| rmuC  | SMD_4220 | 1569 | 66,99 | 111  | 2,71 | 92   | 2,86 | 1,06 |
| wzt   | SMD_0530 | 1422 | 60,55 | 361  | 2,20 | 361  | 2,32 | 1,06 |
| dnaK  | SMD_1794 | 1923 | 64,27 | 471  | 2,37 | 1188 | 2,50 | 1,06 |
| -     | SMD_3143 | 714  | 69,19 | 116  | 3,60 | 113  | 3,80 | 1,05 |
| cutC  | SMD_1958 | 732  | 72,27 | 31   | 2,08 | 28   | 2,19 | 1,05 |
| -     | SMD_0859 | 759  | 67,98 | 21   | 3,98 | 21   | 4,20 | 1,05 |
| smmlI | SMD_1831 | 3087 | 65,21 | 7    | 2,59 | 11   | 2,73 | 1,05 |
| minD  | SMD_1167 | 810  | 65,19 | 558  | 2,35 | 614  | 2,48 | 1,05 |
| -     | SMD_1113 | 297  | 64,31 | 6    | 1,62 | 14   | 1,70 | 1,05 |
| -     | SMD_2825 | 3168 | 67,17 | 41   | 2,65 | 35   | 2,79 | 1,05 |
| smel  | SMD_3873 | 1245 | 67,87 | 59   | 3,84 | 48   | 4,04 | 1,05 |
| metH  | SMD_2754 | 2685 | 66,74 | 24   | 2,42 | 31   | 2,55 | 1,05 |
| -     | SMD_0031 | 1038 | 70,04 | 71   | 5,03 | 73   | 5,29 | 1,05 |
| -     | SMD_1172 | 1074 | 62,57 | 1246 | 2,47 | 1213 | 2,60 | 1,05 |
| rho   | SMD_3859 | 1335 | 65,32 | 531  | 2,51 | 461  | 2,64 | 1,05 |
| yceG  | SMD_0983 | 1062 | 68,93 | 61   | 2,94 | 61   | 3,09 | 1,05 |
| uup   | SMD_1826 | 1884 | 66,24 | 145  | 2,65 | 143  | 2,78 | 1,05 |
| -     | SMD_3069 | 1626 | 71,46 | 63   | 4,70 | 58   | 4,94 | 1,05 |
| murJ  | SMD_1195 | 1605 | 67,98 | 57   | 2,64 | 53   | 2,78 | 1,05 |
| -     | SMD_0078 | 1809 | 72,64 | 18   | 3,00 | 18   | 3,15 | 1,05 |
| rluF2 | SMD_3101 | 699  | 70,96 | 76   | 3,45 | 64   | 3,62 | 1,05 |
| -     | SMD_1258 | 837  | 68,10 | 314  | 2,47 | 149  | 2,59 | 1,05 |
| sppA  | SMD_3789 | 1911 | 68,24 | 131  | 3,09 | 139  | 3,24 | 1,05 |
| thrS  | SMD_2952 | 1902 | 64,46 | 546  | 2,66 | 516  | 2,79 | 1,05 |
| metX  | SMD_2851 | 1113 | 68,01 | 119  | 3,27 | 117  | 3,43 | 1,05 |
| truA  | SMD_3000 | 771  | 68,61 | 98   | 2,29 | 86   | 2,40 | 1,05 |
| -     | SMD_3343 | 2436 | 66,58 | 13   | 3,26 | 14   | 3,42 | 1,05 |
| -     | SMD_3193 | 3507 | 68,55 | 47   | 2,79 | 42   | 2,93 | 1,05 |
| fliC3 | SMD_2077 | 1218 | 67,16 | 216  | 3,50 | 116  | 3,67 | 1,05 |
| -     | SMD_2713 | 990  | 67,07 | 61   | 2,56 | 73   | 2,68 | 1,05 |
| -     | SMD_1559 | 825  | 64,73 | 11   | 3,08 | 13   | 3,23 | 1,05 |
| surA  | SMD_0701 | 1347 | 67,19 | 513  | 2,59 | 494  | 2,72 | 1,05 |
| proS  | SMD_0559 | 1704 | 67,55 | 225  | 3,00 | 242  | 3,15 | 1,05 |
| groEL | SMD_3813 | 1650 | 64,30 | 1879 | 3,64 | 6422 | 3,82 | 1,05 |
| purF  | SMD_0841 | 1467 | 66,39 | 187  | 2,77 | 212  | 2,90 | 1,05 |
| -     | SMD_1200 | 1884 | 66,35 | 36   | 2,33 | 39   | 2,44 | 1,05 |
| fabG5 | SMD_4091 | 714  | 67,23 | 117  | 2,15 | 78   | 2,25 | 1,05 |
| yajC  | SMD_1810 | 345  | 62,32 | 651  | 2,24 | 553  | 2,34 | 1,05 |
| hpt   | SMD_3118 | 555  | 67,39 | 241  | 2,40 | 225  | 2,51 | 1,05 |
| -     | SMD_1397 | 1638 | 66,97 | 14   | 3,12 | 9    | 3,27 | 1,05 |
| -     | SMD_3244 | 714  | 70,59 | 84   | 3,18 | 98   | 3,33 | 1,05 |
| -     | SMD_3630 | 906  | 68,32 | 77   | 2,62 | 118  | 2,74 | 1,05 |
| parC  | SMD_1356 | 2244 | 66,67 | 256  | 2,44 | 267  | 2,55 | 1,05 |
| purM  | SMD_1049 | 1059 | 68,84 | 198  | 3,48 | 219  | 3,64 | 1,05 |
| secY  | SMD_0805 | 1332 | 64,41 | 776  | 2,26 | 682  | 2,36 | 1,05 |
| -     | SMD_3938 | 927  | 67,31 | 55   | 3,05 | 69   | 3,19 | 1,05 |
| cusB2 | SMD_2140 | 1176 | 66,84 | 118  | 1,83 | 157  | 1,91 | 1,04 |
| nuoD  | SMD_2977 | 1308 | 63,38 | 924  | 2,19 | 846  | 2,29 | 1,04 |
| rpmG  | SMD_4131 | 165  | 53,94 | 1911 | 3,79 | 1773 | 3,96 | 1,04 |
| glnS  | SMD_0713 | 1749 | 66,50 | 179  | 3,04 | 217  | 3,17 | 1,04 |

|        |          |      |       |       |      |       |      |      |
|--------|----------|------|-------|-------|------|-------|------|------|
| acsA   | SMD_4155 | 1944 | 66,56 | 149   | 3,48 | 162   | 3,63 | 1,04 |
| dapA   | SMD_1709 | 894  | 70,58 | 185   | 3,31 | 227   | 3,46 | 1,04 |
| aceE2  | SMD_0412 | 2688 | 64,29 | 893   | 2,30 | 881   | 2,40 | 1,04 |
| tsf    | SMD_1337 | 876  | 64,95 | 1874  | 2,52 | 1727  | 2,63 | 1,04 |
| -      | SMD_1987 | 771  | 67,19 | 144   | 2,95 | 161   | 3,08 | 1,04 |
| -      | SMD_1805 | 2796 | 68,17 | 36    | 2,29 | 32    | 2,39 | 1,04 |
| lpxO   | SMD_3953 | 909  | 65,57 | 119   | 3,33 | 112   | 3,48 | 1,04 |
| pefL   | SMD_0587 | 1146 | 70,77 | 34    | 2,51 | 41    | 2,62 | 1,04 |
| fabF2  | SMD_4090 | 1239 | 68,28 | 81    | 2,11 | 63    | 2,20 | 1,04 |
| -      | SMD_2187 | 423  | 59,10 | 33    | 2,88 | 43    | 3,00 | 1,04 |
| exbB   | SMD_0009 | 762  | 64,57 | 2956  | 2,10 | 2945  | 2,19 | 1,04 |
| trpC   | SMD_3903 | 795  | 69,18 | 121   | 3,25 | 123   | 3,39 | 1,04 |
| -      | SMD_0829 | 1092 | 63,92 | 11314 | 3,24 | 14418 | 3,37 | 1,04 |
| -      | SMD_0407 | 486  | 63,37 | 171   | 2,74 | 187   | 2,85 | 1,04 |
| accC   | SMD_3835 | 1368 | 65,42 | 695   | 1,94 | 631   | 2,02 | 1,04 |
| -      | SMD_1647 | 594  | 69,19 | 61    | 2,73 | 45    | 2,84 | 1,04 |
| murF   | SMD_0640 | 1395 | 69,68 | 147   | 2,18 | 175   | 2,27 | 1,04 |
| ftsI   | SMD_0638 | 1845 | 68,29 | 154   | 2,81 | 177   | 2,93 | 1,04 |
| motB   | SMD_0477 | 951  | 66,98 | 82    | 3,23 | 37    | 3,36 | 1,04 |
| hns    | SMD_0558 | 384  | 65,63 | 369   | 2,82 | 435   | 2,93 | 1,04 |
| rpmF   | SMD_0975 | 195  | 64,10 | 1769  | 2,54 | 1694  | 2,64 | 1,04 |
| -      | SMD_2224 | 984  | 67,17 | 172   | 2,73 | 195   | 2,84 | 1,04 |
| lptB   | SMD_1035 | 720  | 66,25 | 186   | 2,50 | 213   | 2,60 | 1,04 |
| rplK   | SMD_0774 | 429  | 62,70 | 4817  | 2,31 | 4275  | 2,40 | 1,04 |
| nusA   | SMD_2963 | 1512 | 65,94 | 618   | 2,81 | 512   | 2,92 | 1,04 |
| -      | SMD_1964 | 2466 | 69,02 | 131   | 2,32 | 115   | 2,41 | 1,04 |
| -      | SMD_0256 | 876  | 67,47 | 34    | 3,73 | 24    | 3,87 | 1,04 |
| -      | SMD_4057 | 1176 | 68,03 | 26    | 2,66 | 16    | 2,76 | 1,04 |
| greA   | SMD_2001 | 459  | 63,83 | 474   | 2,21 | 438   | 2,29 | 1,04 |
| tolC   | SMD_3531 | 1359 | 67,40 | 524   | 2,63 | 559   | 2,73 | 1,04 |
| hisS   | SMD_1943 | 1398 | 66,09 | 217   | 2,63 | 213   | 2,73 | 1,04 |
| -      | SMD_3619 | 393  | 67,43 | 42    | 2,18 | 39    | 2,27 | 1,04 |
| -      | SMD_4216 | 312  | 71,15 | 123   | 2,59 | 121   | 2,69 | 1,04 |
| -      | SMD_3404 | 1377 | 70,37 | 57    | 2,61 | 47    | 2,71 | 1,04 |
| smeF   | SMD_3656 | 1386 | 69,05 | 233   | 2,39 | 298   | 2,48 | 1,04 |
| rpiA   | SMD_3469 | 648  | 66,36 | 153   | 2,14 | 196   | 2,22 | 1,04 |
| -      | SMD_0397 | 1365 | 69,01 | 58    | 2,91 | 65    | 3,01 | 1,04 |
| rplY   | SMD_0756 | 618  | 63,27 | 2792  | 2,72 | 2524  | 2,83 | 1,04 |
| panD   | SMD_1718 | 381  | 61,94 | 491   | 2,62 | 561   | 2,72 | 1,04 |
| xthA3  | SMD_4151 | 768  | 65,89 | 217   | 3,26 | 169   | 3,38 | 1,04 |
| potH   | SMD_1413 | 933  | 63,24 | 89    | 2,38 | 81    | 2,47 | 1,04 |
| moeA   | SMD_2439 | 1254 | 70,81 | 28    | 2,52 | 32    | 2,61 | 1,04 |
| dcd    | SMD_3025 | 573  | 64,22 | 211   | 3,05 | 217   | 3,16 | 1,04 |
| wecB   | SMD_0599 | 1176 | 69,05 | 21    | 3,01 | 13    | 3,12 | 1,04 |
| recB   | SMD_4210 | 3678 | 69,44 | 48    | 2,31 | 59    | 2,39 | 1,03 |
| -      | SMD_3884 | 393  | 65,39 | 199   | 4,13 | 221   | 4,27 | 1,03 |
| uvrB   | SMD_1455 | 2025 | 64,40 | 66    | 2,71 | 62    | 2,80 | 1,03 |
| infB   | SMD_2962 | 2646 | 66,29 | 668   | 2,16 | 589   | 2,23 | 1,03 |
| sphB   | SMD_3105 | 2646 | 70,18 | 26    | 2,78 | 22    | 2,87 | 1,03 |
| acn    | SMD_2022 | 2754 | 66,16 | 75    | 2,49 | 113   | 2,57 | 1,03 |
| ihfB   | SMD_1840 | 306  | 63,07 | 321   | 2,41 | 295   | 2,49 | 1,03 |
| -      | SMD_1400 | 879  | 67,69 | 117   | 2,89 | 99    | 2,99 | 1,03 |
| -      | SMD_3719 | 732  | 69,13 | 42    | 2,78 | 43    | 2,87 | 1,03 |
| -      | SMD_0312 | 729  | 68,04 | 19    | 5,16 | 14    | 5,34 | 1,03 |
| -      | SMD_0051 | 525  | 66,48 | 29    | 3,79 | 26    | 3,92 | 1,03 |
| rnk    | SMD_0717 | 405  | 66,42 | 231   | 2,53 | 214   | 2,61 | 1,03 |
| tig    | SMD_0869 | 1296 | 66,98 | 614   | 2,85 | 574   | 2,94 | 1,03 |
| -      | SMD_1738 | 1242 | 65,70 | 129   | 2,57 | 141   | 2,66 | 1,03 |
| -      | SMD_1063 | 804  | 66,67 | 167   | 2,35 | 161   | 2,43 | 1,03 |
| rpsP   | SMD_1226 | 261  | 65,52 | 2878  | 2,64 | 2596  | 2,72 | 1,03 |
| StmPr1 | SMD_0741 | 1701 | 69,37 | 26    | 3,19 | 29    | 3,29 | 1,03 |
| -      | SMD_2143 | 1932 | 67,86 | 77    | 2,63 | 112   | 2,71 | 1,03 |
| phoQ   | SMD_0262 | 1425 | 68,70 | 92    | 3,61 | 119   | 3,72 | 1,03 |
| -      | SMD_0503 | 483  | 67,70 | 214   | 4,04 | 237   | 4,17 | 1,03 |
| -      | SMD_1164 | 1326 | 65,84 | 52    | 2,50 | 61    | 2,58 | 1,03 |

|       |          |      |       |      |      |      |      |      |
|-------|----------|------|-------|------|------|------|------|------|
| -     | SMD_1854 | 1194 | 68,09 | 383  | 2,31 | 352  | 2,39 | 1,03 |
| alaS  | SMD_1680 | 2649 | 67,16 | 234  | 2,73 | 247  | 2,81 | 1,03 |
| fliK  | SMD_2059 | 1170 | 73,16 | 28   | 2,06 | 17   | 2,12 | 1,03 |
| -     | SMD_2163 | 2400 | 67,71 | 32   | 2,32 | 31   | 2,39 | 1,03 |
| -     | SMD_3511 | 672  | 65,18 | 24   | 3,45 | 22   | 3,55 | 1,03 |
| lysA  | SMD_1089 | 2595 | 68,09 | 158  | 2,79 | 176  | 2,87 | 1,03 |
| sodA  | SMD_2814 | 612  | 62,42 | 711  | 2,98 | 1298 | 3,06 | 1,03 |
| -     | SMD_2481 | 525  | 70,86 | 46   | 2,48 | 61   | 2,55 | 1,03 |
| carA  | SMD_1999 | 1128 | 66,49 | 295  | 2,78 | 297  | 2,86 | 1,03 |
| -     | SMD_1508 | 366  | 63,11 | 42   | 2,91 | 48   | 2,99 | 1,03 |
| cspA  | SMD_1819 | 210  | 61,43 | 3113 | 1,76 | 2514 | 1,81 | 1,03 |
| upp   | SMD_1755 | 633  | 68,72 | 123  | 2,87 | 133  | 2,95 | 1,03 |
| murE  | SMD_0639 | 1497 | 70,61 | 184  | 2,33 | 215  | 2,40 | 1,03 |
| -     | SMD_1926 | 3114 | 68,24 | 74   | 2,42 | 56   | 2,48 | 1,03 |
| -     | SMD_0083 | 708  | 65,11 | 43   | 2,38 | 41   | 2,45 | 1,03 |
| nagA  | SMD_3612 | 1149 | 69,45 | 43   | 2,15 | 47   | 2,20 | 1,03 |
| ppiD  | SMD_0879 | 1956 | 66,51 | 255  | 2,72 | 285  | 2,80 | 1,03 |
| galU  | SMD_1845 | 804  | 64,80 | 294  | 2,19 | 311  | 2,25 | 1,03 |
| hemC  | SMD_3718 | 912  | 71,16 | 69   | 4,76 | 81   | 4,89 | 1,03 |
| rtcB  | SMD_4076 | 1221 | 67,90 | 32   | 7,95 | 21   | 8,16 | 1,03 |
| rsmB  | SMD_3775 | 1332 | 71,02 | 118  | 2,88 | 76   | 2,96 | 1,03 |
| -     | SMD_0202 | 2490 | 68,63 | 41   | 3,08 | 21   | 3,16 | 1,03 |
| folE  | SMD_4202 | 612  | 66,83 | 355  | 2,94 | 292  | 3,02 | 1,03 |
| -     | SMD_3213 | 2877 | 63,68 | 68   | 4,04 | 94   | 4,14 | 1,03 |
| -     | SMD_1929 | 1134 | 67,11 | 94   | 2,34 | 81   | 2,40 | 1,02 |
| -     | SMD_0220 | 1101 | 71,39 | 72   | 3,50 | 53   | 3,59 | 1,02 |
| clpP  | SMD_0870 | 591  | 64,47 | 459  | 2,56 | 487  | 2,62 | 1,02 |
| -     | SMD_0605 | 1665 | 64,26 | 421  | 2,99 | 366  | 3,07 | 1,02 |
| -     | SMD_0677 | 972  | 69,86 | 58   | 2,91 | 52   | 2,98 | 1,02 |
| -     | SMD_3492 | 504  | 68,65 | 49   | 3,71 | 65   | 3,80 | 1,02 |
| -     | SMD_1390 | 702  | 65,24 | 977  | 2,43 | 1131 | 2,49 | 1,02 |
| recG  | SMD_3441 | 2112 | 69,65 | 147  | 2,51 | 161  | 2,57 | 1,02 |
| -     | SMD_3695 | 351  | 67,24 | 57   | 2,36 | 38   | 2,42 | 1,02 |
| -     | SMD_3856 | 369  | 66,12 | 68   | 3,95 | 56   | 4,04 | 1,02 |
| -     | SMD_0088 | 3687 | 66,97 | 122  | 2,82 | 111  | 2,89 | 1,02 |
| gyrB  | SMD_0004 | 2460 | 64,39 | 334  | 2,60 | 345  | 2,66 | 1,02 |
| aroA  | SMD_2680 | 1308 | 68,88 | 61   | 2,59 | 79   | 2,65 | 1,02 |
| fumC  | SMD_2769 | 1383 | 67,75 | 49   | 3,05 | 71   | 3,12 | 1,02 |
| rluB2 | SMD_0831 | 723  | 69,71 | 92   | 2,93 | 116  | 2,99 | 1,02 |
| -     | SMD_1163 | 2079 | 66,28 | 178  | 2,41 | 217  | 2,46 | 1,02 |
| ilvE  | SMD_0740 | 1095 | 67,31 | 216  | 2,75 | 237  | 2,81 | 1,02 |
| rplO  | SMD_0804 | 444  | 66,22 | 4698 | 2,06 | 3848 | 2,11 | 1,02 |
| dcp   | SMD_0192 | 2157 | 65,60 | 198  | 3,06 | 216  | 3,12 | 1,02 |
| -     | SMD_2340 | 1422 | 69,69 | 36   | 2,08 | 21   | 2,12 | 1,02 |
| -     | SMD_1030 | 885  | 67,91 | 46   | 2,65 | 63   | 2,71 | 1,02 |
| -     | SMD_3308 | 819  | 67,40 | 611  | 3,02 | 591  | 3,09 | 1,02 |
| -     | SMD_2137 | 1209 | 65,34 | 63   | 1,86 | 81   | 1,90 | 1,02 |
| -     | SMD_2635 | 984  | 64,74 | 159  | 2,21 | 195  | 2,25 | 1,02 |
| -     | SMD_4191 | 771  | 69,00 | 71   | 2,86 | 73   | 2,91 | 1,02 |
| nadR  | SMD_0355 | 1074 | 67,78 | 18   | 2,34 | 17   | 2,39 | 1,02 |
| cgb   | SMD_2554 | 2796 | 68,03 | 34   | 2,48 | 42   | 2,53 | 1,02 |
| -     | SMD_2528 | 654  | 67,89 | 11   | 2,39 | 12   | 2,44 | 1,02 |
| hsdM  | SMD_1863 | 1683 | 58,29 | 135  | 2,22 | 118  | 2,26 | 1,02 |
| gst6  | SMD_4051 | 690  | 66,23 | 42   | 3,97 | 47   | 4,04 | 1,02 |
| gph   | SMD_0499 | 669  | 66,67 | 148  | 3,64 | 136  | 3,71 | 1,02 |
| -     | SMD_4103 | 552  | 69,20 | 136  | 2,76 | 116  | 2,81 | 1,02 |
| rlmB  | SMD_1369 | 744  | 68,68 | 131  | 2,74 | 126  | 2,79 | 1,02 |
| hemF  | SMD_4119 | 897  | 68,78 | 63   | 3,50 | 52   | 3,56 | 1,02 |
| ispH  | SMD_1199 | 951  | 66,88 | 249  | 2,20 | 254  | 2,24 | 1,02 |
| -     | SMD_2830 | 3081 | 63,16 | 262  | 2,20 | 281  | 2,24 | 1,02 |
| -     | SMD_1130 | 1512 | 67,00 | 29   | 2,78 | 28   | 2,83 | 1,02 |
| -     | SMD_3399 | 1143 | 67,28 | 363  | 2,46 | 273  | 2,51 | 1,02 |
| flgH  | SMD_2082 | 693  | 67,97 | 62   | 1,94 | 34   | 1,97 | 1,02 |
| secD  | SMD_1811 | 1857 | 65,75 | 363  | 2,49 | 325  | 2,53 | 1,02 |
| putA  | SMD_0356 | 3219 | 68,97 | 251  | 2,30 | 231  | 2,34 | 1,02 |

|       |          |      |       |      |       |      |       |      |
|-------|----------|------|-------|------|-------|------|-------|------|
| fabA  | SMD_0493 | 516  | 66,28 | 451  | 2,19  | 389  | 2,23  | 1,02 |
| -     | SMD_0612 | 378  | 61,90 | 111  | 3,05  | 89   | 3,10  | 1,02 |
| -     | SMD_4056 | 711  | 62,59 | 13   | 2,40  | 13   | 2,44  | 1,02 |
| -     | SMD_1348 | 867  | 70,59 | 69   | 2,34  | 77   | 2,38  | 1,02 |
| fliD  | SMD_2074 | 1416 | 63,91 | 154  | 2,24  | 91   | 2,27  | 1,02 |
| rsmC  | SMD_0489 | 1065 | 72,49 | 82   | 3,86  | 73   | 3,92  | 1,02 |
| -     | SMD_0746 | 576  | 67,01 | 92   | 2,81  | 121  | 2,85  | 1,02 |
| -     | SMD_2793 | 495  | 66,06 | 211  | 2,64  | 238  | 2,68  | 1,02 |
| -     | SMD_3099 | 558  | 67,74 | 121  | 3,40  | 131  | 3,45  | 1,02 |
| -     | SMD_3902 | 675  | 69,48 | 115  | 3,38  | 119  | 3,43  | 1,02 |
| purL  | SMD_0576 | 3921 | 69,73 | 216  | 2,55  | 168  | 2,59  | 1,01 |
| -     | SMD_1640 | 996  | 70,08 | 17   | 3,24  | 23   | 3,28  | 1,01 |
| rplA  | SMD_0775 | 699  | 65,38 | 3854 | 2,32  | 3357 | 2,35  | 1,01 |
| accA  | SMD_1321 | 960  | 66,67 | 437  | 2,20  | 353  | 2,24  | 1,01 |
| nuoG  | SMD_2974 | 2235 | 68,32 | 934  | 2,02  | 842  | 2,05  | 1,01 |
| -     | SMD_0685 | 1272 | 69,10 | 45   | 3,52  | 55   | 3,57  | 1,01 |
| tolA  | SMD_3311 | 1056 | 69,41 | 144  | 2,49  | 161  | 2,52  | 1,01 |
| spgM  | SMD_0549 | 1347 | 65,78 | 271  | 2,47  | 281  | 2,51  | 1,01 |
| pefK  | SMD_0586 | 864  | 67,94 | 34   | 2,71  | 34   | 2,74  | 1,01 |
| -     | SMD_0317 | 897  | 73,36 | 155  | 2,82  | 131  | 2,86  | 1,01 |
| -     | SMD_3486 | 1947 | 69,03 | 111  | 3,63  | 116  | 3,68  | 1,01 |
| -     | SMD_2135 | 273  | 62,64 | 57   | 2,40  | 62   | 2,43  | 1,01 |
| -     | SMD_3004 | 1017 | 69,22 | 181  | 2,69  | 172  | 2,72  | 1,01 |
| virB4 | SMD_2632 | 2442 | 59,79 | 217  | 1,87  | 281  | 1,89  | 1,01 |
| -     | SMD_1957 | 996  | 67,97 | 52   | 2,41  | 52   | 2,44  | 1,01 |
| -     | SMD_2634 | 405  | 57,53 | 893  | 2,90  | 952  | 2,93  | 1,01 |
| dfp   | SMD_0321 | 1290 | 69,61 | 116  | 3,37  | 95   | 3,41  | 1,01 |
| -     | SMD_3711 | 636  | 64,94 | 1354 | 3,74  | 1343 | 3,79  | 1,01 |
| -     | SMD_2461 | 384  | 68,75 | 64   | 2,24  | 67   | 2,26  | 1,01 |
| -     | SMD_3031 | 2007 | 67,91 | 294  | 2,37  | 232  | 2,39  | 1,01 |
| algC  | SMD_0323 | 2286 | 70,47 | 65   | 2,59  | 55   | 2,61  | 1,01 |
| exbD  | SMD_0010 | 426  | 59,15 | 2412 | 2,18  | 2234 | 2,20  | 1,01 |
| -     | SMD_0484 | 1068 | 68,35 | 221  | 2,96  | 248  | 2,99  | 1,01 |
| sodC  | SMD_0114 | 570  | 69,65 | 141  | 2,79  | 179  | 2,82  | 1,01 |
| -     | SMD_0681 | 936  | 64,96 | 32   | 1,95  | 32   | 1,97  | 1,01 |
| rluA  | SMD_0820 | 615  | 67,80 | 29   | 3,18  | 31   | 3,21  | 1,01 |
| -     | SMD_2867 | 264  | 64,02 | 79   | 1,83  | 74   | 1,85  | 1,01 |
| -     | SMD_1189 | 408  | 63,73 | 214  | 2,29  | 223  | 2,31  | 1,01 |
| -     | SMD_0658 | 585  | 66,15 | 99   | 2,96  | 81   | 2,99  | 1,01 |
| -     | SMD_1269 | 2094 | 65,57 | 211  | 2,18  | 151  | 2,20  | 1,01 |
| -     | SMD_1813 | 1290 | 64,65 | 351  | 2,50  | 345  | 2,52  | 1,01 |
| htrB  | SMD_3534 | 918  | 66,45 | 121  | 3,69  | 123  | 3,72  | 1,01 |
| pykA  | SMD_3401 | 1467 | 66,67 | 111  | 3,12  | 138  | 3,14  | 1,01 |
| ndk   | SMD_1849 | 426  | 64,79 | 1254 | 2,49  | 971  | 2,51  | 1,01 |
| serS  | SMD_2677 | 1281 | 67,76 | 213  | 3,04  | 218  | 3,07  | 1,01 |
| dsbA2 | SMD_3594 | 834  | 70,02 | 181  | 2,39  | 182  | 2,41  | 1,01 |
| pps   | SMD_2613 | 2379 | 64,99 | 546  | 2,94  | 577  | 2,96  | 1,01 |
| rnt   | SMD_1375 | 585  | 65,98 | 181  | 3,51  | 151  | 3,54  | 1,01 |
| recJ  | SMD_2004 | 1758 | 69,68 | 73   | 3,06  | 64   | 3,08  | 1,01 |
| hsdS  | SMD_1864 | 1623 | 50,03 | 138  | 1,84  | 126  | 1,85  | 1,01 |
| -     | SMD_1370 | 1440 | 69,72 | 18   | 2,72  | 14   | 2,73  | 1,01 |
| -     | SMD_2744 | 843  | 68,09 | 47   | 2,76  | 44   | 2,78  | 1,01 |
| -     | SMD_3413 | 558  | 65,77 | 11   | 6,38  | 8    | 6,42  | 1,01 |
| fabD  | SMD_0978 | 894  | 71,59 | 416  | 3,06  | 394  | 3,08  | 1,01 |
| -     | SMD_0508 | 720  | 67,78 | 25   | 2,53  | 25   | 2,55  | 1,01 |
| -     | SMD_0526 | 237  | 58,65 | 124  | 11,67 | 211  | 11,74 | 1,01 |
| rlmL  | SMD_1395 | 2139 | 68,40 | 81   | 3,00  | 54   | 3,02  | 1,01 |
| hemL  | SMD_3474 | 1290 | 68,76 | 111  | 2,90  | 131  | 2,92  | 1,01 |
| dnaN  | SMD_0002 | 1101 | 63,67 | 314  | 2,40  | 392  | 2,42  | 1,01 |
| -     | SMD_0667 | 507  | 66,47 | 113  | 3,29  | 97   | 3,31  | 1,01 |
| -     | SMD_3349 | 771  | 74,06 | 82   | 2,71  | 79   | 2,73  | 1,01 |
| betA  | SMD_2018 | 1683 | 67,32 | 26   | 2,84  | 31   | 2,85  | 1,01 |
| tex   | SMD_2599 | 2388 | 69,05 | 94   | 2,71  | 115  | 2,72  | 1,01 |
| -     | SMD_0500 | 1842 | 67,64 | 119  | 3,03  | 71   | 3,05  | 1,00 |
| secF  | SMD_1812 | 981  | 64,02 | 522  | 2,10  | 475  | 2,11  | 1,00 |



|       |          |      |       |      |      |      |      |      |
|-------|----------|------|-------|------|------|------|------|------|
| -     | SMD_3818 | 564  | 69,86 | 24   | 2,71 | 33   | 2,72 | 1,00 |
| hfq   | SMD_1673 | 276  | 60,14 | 331  | 2,54 | 411  | 2,54 | 1,00 |
| asnC  | SMD_2731 | 1395 | 65,30 | 466  | 2,87 | 417  | 2,88 | 1,00 |
| -     | SMD_0842 | 825  | 69,45 | 66   | 2,55 | 71   | 2,56 | 1,00 |
| acnB  | SMD_2025 | 2592 | 66,20 | 411  | 2,27 | 521  | 2,28 | 1,00 |
| -     | SMD_4068 | 885  | 69,94 | 51   | 3,72 | 41   | 3,73 | 1,00 |
| rpsB  | SMD_1338 | 807  | 64,06 | 2411 | 2,78 | 2216 | 2,78 | 1,00 |
| mdh   | SMD_0819 | 987  | 65,45 | 981  | 2,41 | 1227 | 2,42 | 1,00 |
| argG  | SMD_2873 | 1197 | 65,66 | 156  | 2,25 | 126  | 2,26 | 1,00 |
| dgkA  | SMD_0687 | 396  | 68,43 | 89   | 2,90 | 119  | 2,90 | 1,00 |
| sucD  | SMD_3354 | 876  | 64,16 | 2126 | 1,94 | 1812 | 1,94 | 1,00 |
| -     | SMD_3457 | 597  | 67,00 | 113  | 2,89 | 111  | 2,89 | 1,00 |
| rpoC  | SMD_0779 | 4224 | 64,49 | 1262 | 2,11 | 1179 | 2,11 | 1,00 |
| fliM  | SMD_2057 | 1005 | 64,78 | 81   | 2,20 | 52   | 2,21 | 1,00 |
| thrC  | SMD_1941 | 1287 | 69,15 | 21   | 2,96 | 21   | 2,96 | 1,00 |
| -     | SMD_0214 | 837  | 68,82 | 72   | 2,67 | 62   | 2,68 | 1,00 |
| -     | SMD_4199 | 3381 | 67,35 | 218  | 2,23 | 191  | 2,23 | 1,00 |
| murA  | SMD_1041 | 1272 | 66,67 | 237  | 2,88 | 265  | 2,88 | 1,00 |
| scrK  | SMD_1967 | 996  | 69,88 | 116  | 2,04 | 93   | 2,04 | 1,00 |
| ccmE  | SMD_2846 | 462  | 68,61 | 54   | 2,69 | 71   | 2,69 | 1,00 |
| -     | SMD_4157 | 576  | 63,89 | 19   | 3,31 | 21   | 3,30 | 1,00 |
| pilY1 | SMD_1451 | 3753 | 63,87 | 68   | 2,14 | 42   | 2,14 | 1,00 |
| rpoN  | SMD_1034 | 1422 | 68,21 | 88   | 2,64 | 112  | 2,64 | 1,00 |
| -     | SMD_1165 | 480  | 67,71 | 219  | 2,32 | 235  | 2,32 | 1,00 |
| -     | SMD_2704 | 1161 | 66,67 | 47   | 2,99 | 38   | 2,99 | 1,00 |
| pnp   | SMD_2958 | 2109 | 63,58 | 1564 | 2,22 | 1456 | 2,22 | 1,00 |
| mutY  | SMD_1742 | 1125 | 69,07 | 49   | 2,95 | 61   | 2,95 | 1,00 |
| orn   | SMD_2617 | 573  | 65,62 | 126  | 3,33 | 128  | 3,33 | 1,00 |
| fabZ  | SMD_1327 | 459  | 63,62 | 512  | 2,46 | 464  | 2,46 | 1,00 |
| nlpD  | SMD_1664 | 759  | 70,36 | 228  | 2,24 | 219  | 2,23 | 1,00 |
| -     | SMD_3664 | 675  | 68,74 | 181  | 2,55 | 256  | 2,55 | 1,00 |
| fdnG  | SMD_3446 | 3069 | 64,84 | 24   | 5,60 | 37   | 5,59 | 1,00 |
| proC  | SMD_1011 | 822  | 69,59 | 59   | 2,66 | 62   | 2,66 | 1,00 |
| -     | SMD_0304 | 1434 | 68,55 | 113  | 3,69 | 141  | 3,68 | 1,00 |
| slyD  | SMD_3040 | 483  | 63,77 | 564  | 2,44 | 422  | 2,43 | 1,00 |
| lysS  | SMD_2013 | 1512 | 65,34 | 358  | 2,67 | 414  | 2,66 | 1,00 |
| -     | SMD_1329 | 2364 | 63,62 | 426  | 2,20 | 425  | 2,19 | 1,00 |
| -     | SMD_2997 | 2019 | 65,82 | 98   | 2,37 | 71   | 2,37 | 1,00 |
| ddlB  | SMD_0645 | 963  | 68,85 | 261  | 2,00 | 299  | 2,00 | 1,00 |
| -     | SMD_0972 | 1836 | 67,54 | 58   | 3,61 | 59   | 3,60 | 1,00 |
| -     | SMD_2495 | 921  | 67,43 | 155  | 2,91 | 156  | 2,90 | 1,00 |
| sodC2 | SMD_0115 | 627  | 69,54 | 161  | 2,64 | 195  | 2,63 | 1,00 |
| mrdB  | SMD_3642 | 1113 | 67,21 | 79   | 2,46 | 73   | 2,45 | 1,00 |
| -     | SMD_2002 | 918  | 69,83 | 147  | 2,23 | 113  | 2,22 | 1,00 |
| -     | SMD_2121 | 1047 | 69,44 | 7    | 1,98 | 8    | 1,97 | 1,00 |
| parA  | SMD_4147 | 798  | 67,79 | 235  | 3,18 | 234  | 3,17 | 1,00 |
| ppiB  | SMD_0818 | 492  | 64,02 | 1136 | 2,54 | 1236 | 2,53 | 0,99 |
| -     | SMD_0853 | 1647 | 70,07 | 37   | 3,35 | 56   | 3,33 | 0,99 |
| -     | SMD_2719 | 732  | 68,03 | 44   | 3,06 | 64   | 3,05 | 0,99 |
| atpH  | SMD_3701 | 528  | 71,21 | 826  | 2,52 | 773  | 2,51 | 0,99 |
| rpsL  | SMD_0780 | 375  | 64,80 | 3112 | 2,14 | 2674 | 2,13 | 0,99 |
| prpD  | SMD_3176 | 1461 | 67,83 | 19   | 3,32 | 23   | 3,30 | 0,99 |
| -     | SMD_2733 | 315  | 68,57 | 149  | 3,27 | 138  | 3,26 | 0,99 |
| rpmD  | SMD_0803 | 168  | 61,90 | 5631 | 2,10 | 4493 | 2,08 | 0,99 |
| fabB  | SMD_0492 | 1209 | 67,66 | 386  | 2,33 | 354  | 2,32 | 0,99 |
| RL35  | SMD_2950 | 198  | 60,61 | 4625 | 2,45 | 4212 | 2,43 | 0,99 |
| minC  | SMD_1168 | 783  | 69,73 | 214  | 3,02 | 259  | 3,00 | 0,99 |
| rpoB  | SMD_0778 | 4155 | 64,16 | 1117 | 2,35 | 1117 | 2,33 | 0,99 |
| nahB  | SMD_3618 | 2358 | 67,22 | 24   | 3,45 | 25   | 3,42 | 0,99 |
| atpG  | SMD_3699 | 864  | 61,69 | 1139 | 2,05 | 1126 | 2,03 | 0,99 |
| gpsA  | SMD_0126 | 1026 | 70,57 | 411  | 2,41 | 461  | 2,40 | 0,99 |
| mgtE  | SMD_1026 | 1362 | 67,47 | 42   | 3,52 | 41   | 3,50 | 0,99 |
| -     | SMD_0726 | 1419 | 70,54 | 13   | 3,16 | 12   | 3,13 | 0,99 |
| rluD  | SMD_3350 | 990  | 68,69 | 151  | 2,52 | 155  | 2,50 | 0,99 |
| -     | SMD_4078 | 456  | 70,39 | 12   | 7,78 | 11   | 7,72 | 0,99 |

|       |          |      |       |      |      |      |      |      |
|-------|----------|------|-------|------|------|------|------|------|
| -     | SMD_4096 | 2355 | 70,40 | 49   | 2,45 | 43   | 2,43 | 0,99 |
| estB  | SMD_3721 | 660  | 68,94 | 99   | 3,76 | 117  | 3,72 | 0,99 |
| -     | SMD_0230 | 1167 | 67,27 | 244  | 2,58 | 314  | 2,56 | 0,99 |
| ecnA  | SMD_0277 | 138  | 60,14 | 315  | 2,75 | 371  | 2,73 | 0,99 |
| rpsA  | SMD_1839 | 1686 | 61,92 | 4422 | 2,06 | 3878 | 2,04 | 0,99 |
| rpsT  | SMD_1194 | 270  | 65,19 | 2173 | 2,50 | 1887 | 2,47 | 0,99 |
| -     | SMD_0467 | 2112 | 67,71 | 121  | 2,68 | 154  | 2,65 | 0,99 |
| -     | SMD_2484 | 327  | 67,28 | 61   | 3,05 | 53   | 3,02 | 0,99 |
| purC  | SMD_3912 | 927  | 67,10 | 69   | 4,62 | 91   | 4,58 | 0,99 |
| -     | SMD_0008 | 666  | 66,82 | 931  | 2,75 | 1136 | 2,73 | 0,99 |
| -     | SMD_1220 | 2307 | 69,44 | 113  | 2,26 | 111  | 2,24 | 0,99 |
| prpC  | SMD_3181 | 1158 | 64,25 | 289  | 2,62 | 275  | 2,60 | 0,99 |
| -     | SMD_1285 | 414  | 68,60 | 21   | 2,45 | 16   | 2,42 | 0,99 |
| -     | SMD_0825 | 459  | 66,67 | 77   | 4,26 | 146  | 4,22 | 0,99 |
| -     | SMD_1085 | 399  | 63,41 | 1714 | 2,60 | 2166 | 2,57 | 0,99 |
| pilH  | SMD_3170 | 372  | 66,13 | 127  | 2,65 | 112  | 2,62 | 0,99 |
| rpoA  | SMD_0809 | 999  | 63,36 | 3883 | 2,32 | 3351 | 2,29 | 0,99 |
| -     | SMD_1050 | 1140 | 70,96 | 111  | 3,82 | 115  | 3,78 | 0,99 |
| oxyR  | SMD_0718 | 963  | 68,22 | 53   | 3,56 | 66   | 3,52 | 0,99 |
| rbsK  | SMD_0675 | 966  | 69,88 | 231  | 2,59 | 215  | 2,56 | 0,99 |
| scpB  | SMD_2835 | 876  | 68,04 | 122  | 3,17 | 95   | 3,14 | 0,99 |
| rfbB  | SMD_0544 | 1056 | 63,92 | 553  | 2,35 | 523  | 2,32 | 0,99 |
| cusA3 | SMD_2133 | 3162 | 66,26 | 8    | 2,42 | 8    | 2,39 | 0,99 |
| -     | SMD_0457 | 1632 | 68,87 | 286  | 2,33 | 137  | 2,30 | 0,99 |
| sucC  | SMD_3355 | 1170 | 62,14 | 2413 | 1,95 | 2142 | 1,92 | 0,99 |
| -     | SMD_3408 | 819  | 69,47 | 138  | 3,35 | 121  | 3,30 | 0,99 |
| -     | SMD_3926 | 1140 | 72,54 | 21   | 4,40 | 18   | 4,34 | 0,99 |
| ggt   | SMD_1750 | 1731 | 67,59 | 136  | 2,38 | 131  | 2,35 | 0,99 |
| cydB  | SMD_2856 | 1152 | 66,41 | 862  | 1,91 | 821  | 1,88 | 0,99 |
| recD  | SMD_4209 | 1881 | 71,50 | 35   | 2,84 | 36   | 2,80 | 0,99 |
| -     | SMD_1024 | 492  | 62,20 | 65   | 3,19 | 77   | 3,15 | 0,99 |
| rpfC  | SMD_2015 | 2178 | 67,72 | 71   | 2,63 | 58   | 2,59 | 0,99 |
| nuoC  | SMD_2978 | 750  | 66,13 | 767  | 2,59 | 689  | 2,56 | 0,99 |
| -     | SMD_3303 | 1197 | 62,91 | 18   | 2,92 | 18   | 2,88 | 0,99 |
| -     | SMD_0174 | 318  | 69,81 | 128  | 4,67 | 148  | 4,60 | 0,99 |
| -     | SMD_0742 | 495  | 62,83 | 228  | 3,38 | 287  | 3,33 | 0,99 |
| adk   | SMD_3489 | 549  | 67,76 | 438  | 2,47 | 642  | 2,43 | 0,99 |
| talB  | SMD_0716 | 957  | 68,65 | 215  | 2,49 | 218  | 2,46 | 0,99 |
| argS  | SMD_0318 | 1644 | 67,88 | 286  | 3,27 | 258  | 3,23 | 0,99 |
| rpsM  | SMD_0806 | 357  | 63,31 | 4182 | 2,08 | 3798 | 2,05 | 0,98 |
| hnsB  | SMD_3749 | 375  | 64,80 | 84   | 1,75 | 79   | 1,72 | 0,98 |
| yfcB  | SMD_3006 | 930  | 64,73 | 261  | 3,03 | 244  | 2,98 | 0,98 |
| queA  | SMD_1808 | 1068 | 69,38 | 61   | 3,11 | 55   | 3,06 | 0,98 |
| murC  | SMD_0644 | 1437 | 69,10 | 292  | 2,05 | 311  | 2,01 | 0,98 |
| -     | SMD_3562 | 3390 | 68,17 | 36   | 3,16 | 16   | 3,11 | 0,98 |
| -     | SMD_0935 | 576  | 71,88 | 124  | 3,43 | 156  | 3,37 | 0,98 |
| lpxC  | SMD_0649 | 912  | 64,69 | 311  | 2,18 | 353  | 2,14 | 0,98 |
| rplQ  | SMD_0810 | 384  | 65,89 | 1993 | 2,09 | 1791 | 2,05 | 0,98 |
| -     | SMD_3735 | 3351 | 68,04 | 51   | 2,59 | 51   | 2,55 | 0,98 |
| -     | SMD_0665 | 2517 | 68,97 | 83   | 2,19 | 81   | 2,15 | 0,98 |
| -     | SMD_1438 | 270  | 68,15 | 268  | 2,96 | 275  | 2,90 | 0,98 |
| -     | SMD_1415 | 1365 | 67,84 | 41   | 2,62 | 37   | 2,57 | 0,98 |
| rluB  | SMD_2836 | 1638 | 71,43 | 184  | 2,52 | 141  | 2,48 | 0,98 |
| gtrB  | SMD_3209 | 1020 | 66,27 | 233  | 3,37 | 228  | 3,31 | 0,98 |
| nuoJ  | SMD_2971 | 657  | 65,75 | 724  | 2,12 | 672  | 2,08 | 0,98 |
| -     | SMD_4034 | 660  | 69,39 | 117  | 2,87 | 142  | 2,82 | 0,98 |
| -     | SMD_1761 | 696  | 65,23 | 223  | 2,64 | 176  | 2,59 | 0,98 |
| lepA  | SMD_3129 | 1809 | 64,07 | 327  | 2,92 | 277  | 2,86 | 0,98 |
| -     | SMD_2831 | 1038 | 66,86 | 96   | 2,83 | 122  | 2,78 | 0,98 |
| dapB  | SMD_1998 | 672  | 72,32 | 83   | 2,37 | 112  | 2,32 | 0,98 |
| rpsR  | SMD_2727 | 231  | 60,17 | 3514 | 2,54 | 2974 | 2,49 | 0,98 |
| rplF  | SMD_0800 | 525  | 63,62 | 4712 | 2,49 | 3611 | 2,44 | 0,98 |
| -     | SMD_4093 | 1185 | 70,46 | 74   | 2,34 | 71   | 2,29 | 0,98 |
| lpxK  | SMD_1467 | 1020 | 69,51 | 111  | 2,10 | 89   | 2,06 | 0,98 |
| pgsA  | SMD_1472 | 627  | 66,35 | 189  | 2,31 | 174  | 2,27 | 0,98 |

|       |          |      |       |      |       |      |       |      |
|-------|----------|------|-------|------|-------|------|-------|------|
| purN  | SMD_1045 | 660  | 71,06 | 37   | 3,46  | 36   | 3,38  | 0,98 |
| -     | SMD_0034 | 840  | 70,24 | 88   | 2,72  | 99   | 2,66  | 0,98 |
| -     | SMD_0814 | 1092 | 67,86 | 7    | 3,91  | 8    | 3,83  | 0,98 |
| -     | SMD_2766 | 888  | 69,03 | 44   | 2,31  | 42   | 2,26  | 0,98 |
| -     | SMD_2606 | 1080 | 69,91 | 71   | 2,54  | 73   | 2,48  | 0,98 |
| -     | SMD_2491 | 381  | 62,20 | 93   | 3,30  | 81   | 3,23  | 0,98 |
| -     | SMD_0283 | 1653 | 68,97 | 151  | 3,06  | 148  | 2,99  | 0,98 |
| -     | SMD_3624 | 324  | 69,75 | 45   | 3,08  | 54   | 3,01  | 0,98 |
| mpl   | SMD_3488 | 1365 | 68,42 | 127  | 3,26  | 151  | 3,18  | 0,98 |
| -     | SMD_3419 | 1839 | 69,49 | 25   | 2,52  | 31   | 2,46  | 0,98 |
| -     | SMD_1985 | 693  | 65,51 | 218  | 2,34  | 237  | 2,29  | 0,98 |
| relA  | SMD_3251 | 2034 | 69,32 | 93   | 3,03  | 117  | 2,96  | 0,98 |
| -     | SMD_2746 | 120  | 51,67 | 13   | 1,99  | 22   | 1,94  | 0,98 |
| edd   | SMD_1726 | 1917 | 70,06 | 41   | 2,33  | 56   | 2,28  | 0,98 |
| -     | SMD_3305 | 957  | 66,35 | 14   | 3,83  | 12   | 3,74  | 0,98 |
| -     | SMD_1182 | 561  | 70,41 | 15   | 4,58  | 19   | 4,47  | 0,98 |
| rplS  | SMD_1229 | 402  | 62,94 | 2123 | 2,88  | 2229 | 2,81  | 0,98 |
| -     | SMD_2788 | 846  | 65,84 | 353  | 3,46  | 411  | 3,38  | 0,98 |
| gidA  | SMD_4020 | 1890 | 69,74 | 119  | 3,74  | 94   | 3,65  | 0,98 |
| pcnB  | SMD_1714 | 1386 | 67,32 | 175  | 2,72  | 175  | 2,65  | 0,98 |
| rpoH  | SMD_3850 | 876  | 64,84 | 287  | 4,52  | 422  | 4,41  | 0,98 |
| -     | SMD_0881 | 366  | 60,93 | 112  | 3,77  | 131  | 3,68  | 0,97 |
| -     | SMD_2129 | 1059 | 66,19 | 44   | 3,51  | 117  | 3,42  | 0,97 |
| uppS  | SMD_1333 | 711  | 70,46 | 238  | 2,49  | 198  | 2,42  | 0,97 |
| ftsE  | SMD_3854 | 687  | 70,01 | 192  | 3,34  | 199  | 3,25  | 0,97 |
| -     | SMD_3792 | 1005 | 72,84 | 119  | 4,14  | 115  | 4,03  | 0,97 |
| -     | SMD_4053 | 1014 | 72,29 | 41   | 4,02  | 37   | 3,91  | 0,97 |
| cspA2 | SMD_2794 | 210  | 60,00 | 468  | 2,57  | 423  | 2,50  | 0,97 |
| -     | SMD_3716 | 603  | 72,97 | 31   | 4,61  | 32   | 4,49  | 0,97 |
| -     | SMD_2745 | 4908 | 66,61 | 681  | 2,20  | 588  | 2,14  | 0,97 |
| accB  | SMD_3834 | 480  | 66,88 | 667  | 2,20  | 517  | 2,14  | 0,97 |
| -     | SMD_3127 | 384  | 58,33 | 261  | 2,66  | 181  | 2,58  | 0,97 |
| -     | SMD_0400 | 561  | 68,45 | 44   | 3,70  | 41   | 3,59  | 0,97 |
| -     | SMD_3001 | 363  | 66,39 | 145  | 2,52  | 141  | 2,45  | 0,97 |
| cheA2 | SMD_2043 | 1845 | 69,38 | 81   | 2,36  | 52   | 2,29  | 0,97 |
| rpsE  | SMD_0802 | 543  | 64,46 | 4189 | 2,19  | 3532 | 2,13  | 0,97 |
| typA  | SMD_0817 | 1848 | 63,10 | 815  | 2,57  | 591  | 2,50  | 0,97 |
| sdhB  | SMD_1735 | 786  | 62,85 | 732  | 1,97  | 788  | 1,92  | 0,97 |
| ychF  | SMD_0758 | 1092 | 65,66 | 333  | 2,40  | 281  | 2,33  | 0,97 |
| -     | SMD_4075 | 1125 | 67,73 | 43   | 10,69 | 37   | 10,37 | 0,97 |
| nuoM  | SMD_2968 | 1509 | 64,41 | 665  | 1,91  | 621  | 1,85  | 0,97 |
| fadL  | SMD_0353 | 1428 | 66,67 | 239  | 2,37  | 232  | 2,30  | 0,97 |
| pyrD  | SMD_1915 | 1056 | 69,51 | 72   | 2,73  | 87   | 2,65  | 0,97 |
| nuoH  | SMD_2973 | 1095 | 62,19 | 911  | 2,06  | 819  | 2,00  | 0,97 |
| argE  | SMD_2872 | 1089 | 68,60 | 92   | 2,68  | 74   | 2,60  | 0,97 |
| -     | SMD_0994 | 2010 | 66,82 | 29   | 2,58  | 26   | 2,50  | 0,97 |
| -     | SMD_1445 | 3201 | 62,01 | 938  | 2,16  | 568  | 2,09  | 0,97 |
| -     | SMD_0592 | 840  | 68,57 | 81   | 3,19  | 99   | 3,08  | 0,97 |
| thiE  | SMD_3473 | 627  | 71,93 | 43   | 2,72  | 41   | 2,63  | 0,97 |
| sucA  | SMD_2774 | 2832 | 65,36 | 738  | 2,38  | 757  | 2,31  | 0,97 |
| rplL  | SMD_0777 | 369  | 62,06 | 7262 | 3,03  | 6211 | 2,93  | 0,97 |
| -     | SMD_3508 | 2850 | 64,46 | 1697 | 3,00  | 1748 | 2,90  | 0,97 |
| -     | SMD_3421 | 450  | 70,00 | 27   | 3,39  | 41   | 3,28  | 0,97 |
| nuoN  | SMD_2967 | 1464 | 66,67 | 582  | 1,98  | 536  | 1,91  | 0,97 |
| -     | SMD_3165 | 840  | 71,31 | 41   | 3,03  | 41   | 2,93  | 0,97 |
| -     | SMD_4099 | 1530 | 69,28 | 58   | 2,15  | 52   | 2,08  | 0,97 |
| dapE  | SMD_1350 | 1119 | 69,62 | 73   | 2,42  | 79   | 2,34  | 0,97 |
| -     | SMD_0837 | 645  | 69,46 | 118  | 2,79  | 111  | 2,70  | 0,97 |
| -     | SMD_1919 | 1533 | 66,08 | 279  | 2,40  | 314  | 2,32  | 0,97 |
| era   | SMD_3125 | 897  | 65,89 | 338  | 2,41  | 299  | 2,32  | 0,97 |
| -     | SMD_0248 | 1137 | 65,44 | 15   | 2,83  | 12   | 2,73  | 0,97 |
| -     | SMD_1842 | 1179 | 66,75 | 161  | 2,63  | 166  | 2,53  | 0,97 |
| -     | SMD_3897 | 645  | 71,16 | 128  | 3,32  | 131  | 3,20  | 0,96 |
| gmk   | SMD_3445 | 666  | 68,47 | 132  | 3,37  | 116  | 3,25  | 0,96 |
| -     | SMD_3611 | 1059 | 68,18 | 25   | 2,67  | 23   | 2,58  | 0,96 |

|       |          |      |       |      |      |      |      |      |
|-------|----------|------|-------|------|------|------|------|------|
| pdxK  | SMD_1798 | 909  | 68,87 | 92   | 2,95 | 95   | 2,84 | 0,96 |
| hrcA  | SMD_1792 | 1065 | 69,39 | 38   | 3,29 | 64   | 3,18 | 0,96 |
| purB  | SMD_2770 | 1368 | 67,18 | 182  | 3,24 | 165  | 3,13 | 0,96 |
| -     | SMD_0968 | 528  | 68,18 | 115  | 3,50 | 123  | 3,37 | 0,96 |
| pitA  | SMD_1645 | 1122 | 66,04 | 288  | 2,53 | 281  | 2,44 | 0,96 |
| -     | SMD_3516 | 975  | 65,54 | 22   | 2,62 | 26   | 2,52 | 0,96 |
| -     | SMD_3567 | 339  | 68,14 | 61   | 2,90 | 71   | 2,79 | 0,96 |
| trpB  | SMD_2992 | 1218 | 67,65 | 46   | 3,53 | 45   | 3,39 | 0,96 |
| -     | SMD_4035 | 1179 | 66,67 | 341  | 2,89 | 353  | 2,78 | 0,96 |
| rpsH  | SMD_0799 | 399  | 60,40 | 3918 | 2,58 | 3165 | 2,49 | 0,96 |
| ileS  | SMD_1197 | 2832 | 67,73 | 215  | 2,39 | 224  | 2,29 | 0,96 |
| potF  | SMD_1411 | 1110 | 63,87 | 171  | 2,31 | 226  | 2,22 | 0,96 |
| -     | SMD_2600 | 216  | 63,43 | 121  | 3,07 | 144  | 2,95 | 0,96 |
| cbsB  | SMD_0527 | 1371 | 64,92 | 397  | 2,67 | 414  | 2,57 | 0,96 |
| gltA  | SMD_3438 | 1278 | 63,85 | 1431 | 2,18 | 1395 | 2,10 | 0,96 |
| nrdR  | SMD_0610 | 522  | 63,60 | 168  | 3,73 | 145  | 3,58 | 0,96 |
| -     | SMD_1966 | 1314 | 66,44 | 131  | 2,01 | 128  | 1,93 | 0,96 |
| exbD3 | SMD_0011 | 381  | 61,42 | 1923 | 2,10 | 1734 | 2,02 | 0,96 |
| acpP  | SMD_0980 | 240  | 57,08 | 4836 | 2,16 | 4916 | 2,08 | 0,96 |
| -     | SMD_4114 | 2358 | 67,60 | 119  | 2,91 | 86   | 2,80 | 0,96 |
| fimV  | SMD_3002 | 2013 | 72,18 | 121  | 2,70 | 131  | 2,59 | 0,96 |
| -     | SMD_3264 | 864  | 69,56 | 43   | 4,46 | 28   | 4,29 | 0,96 |
| tuf   | SMD_0770 | 1191 | 64,32 | 4421 | 2,56 | 4765 | 2,46 | 0,96 |
| -     | SMD_0634 | 789  | 70,72 | 21   | 6,31 | 25   | 6,06 | 0,96 |
| pyrB  | SMD_1023 | 951  | 70,35 | 151  | 3,07 | 152  | 2,95 | 0,96 |
| -     | SMD_1052 | 708  | 70,62 | 92   | 2,43 | 117  | 2,33 | 0,96 |
| -     | SMD_2772 | 1413 | 68,65 | 115  | 2,59 | 121  | 2,49 | 0,96 |
| -     | SMD_3249 | 2100 | 69,14 | 51   | 3,34 | 51   | 3,21 | 0,96 |
| -     | SMD_4050 | 2226 | 67,83 | 111  | 2,92 | 129  | 2,80 | 0,96 |
| -     | SMD_2840 | 807  | 66,67 | 145  | 2,78 | 162  | 2,66 | 0,96 |
| -     | SMD_3374 | 1899 | 58,93 | 71   | 3,49 | 64   | 3,35 | 0,96 |
| atpE  | SMD_3703 | 306  | 66,67 | 2546 | 2,63 | 3222 | 2,52 | 0,96 |
| dacC  | SMD_3638 | 1221 | 67,32 | 313  | 2,39 | 341  | 2,30 | 0,96 |
| tpiA  | SMD_2983 | 756  | 68,25 | 222  | 3,14 | 217  | 3,01 | 0,96 |
| -     | SMD_4019 | 477  | 70,44 | 116  | 3,87 | 111  | 3,72 | 0,96 |
| -     | SMD_4102 | 1686 | 72,54 | 92   | 2,94 | 72   | 2,82 | 0,96 |
| -     | SMD_3130 | 1533 | 69,41 | 77   | 2,68 | 219  | 2,57 | 0,96 |
| -     | SMD_2714 | 1632 | 68,26 | 25   | 2,76 | 27   | 2,65 | 0,96 |
| ptsl  | SMD_1027 | 1770 | 69,04 | 65   | 2,81 | 81   | 2,69 | 0,96 |
| alf1  | SMD_3400 | 1005 | 64,78 | 898  | 2,55 | 783  | 2,44 | 0,96 |
| -     | SMD_2375 | 2352 | 66,16 | 65   | 2,93 | 79   | 2,81 | 0,96 |
| -     | SMD_2293 | 348  | 64,94 | 21   | 4,35 | 16   | 4,17 | 0,96 |
| -     | SMD_0167 | 3600 | 69,03 | 14   | 3,54 | 15   | 3,40 | 0,96 |
| -     | SMD_0335 | 1473 | 67,55 | 116  | 3,69 | 216  | 3,53 | 0,96 |
| -     | SMD_4159 | 2148 | 68,48 | 194  | 2,56 | 197  | 2,45 | 0,96 |
| flgF  | SMD_2084 | 750  | 66,67 | 122  | 2,06 | 72   | 1,97 | 0,96 |
| rpsD  | SMD_0808 | 630  | 62,54 | 5842 | 2,15 | 4918 | 2,06 | 0,96 |
| odhL  | SMD_2776 | 1437 | 64,79 | 872  | 1,99 | 876  | 1,90 | 0,96 |
| -     | SMD_2626 | 855  | 69,82 | 24   | 2,58 | 34   | 2,47 | 0,96 |
| zwf   | SMD_1729 | 1437 | 68,06 | 74   | 3,30 | 111  | 3,15 | 0,96 |
| -     | SMD_0571 | 1092 | 67,86 | 115  | 3,30 | 121  | 3,15 | 0,96 |
| -     | SMD_0480 | 375  | 72,53 | 33   | 4,30 | 31   | 4,11 | 0,96 |
| nadE2 | SMD_2145 | 1668 | 66,73 | 64   | 2,20 | 83   | 2,10 | 0,96 |
| -     | SMD_4018 | 963  | 73,42 | 119  | 4,06 | 111  | 3,88 | 0,96 |
| dat   | SMD_1253 | 1401 | 64,88 | 771  | 2,14 | 519  | 2,05 | 0,96 |
| fusA  | SMD_0782 | 2142 | 62,75 | 2751 | 2,20 | 2491 | 2,11 | 0,96 |
| -     | SMD_2144 | 441  | 63,27 | 112  | 1,91 | 147  | 1,83 | 0,96 |
| -     | SMD_3778 | 1131 | 67,90 | 88   | 5,58 | 55   | 5,33 | 0,95 |
| ampR  | SMD_3328 | 867  | 70,93 | 21   | 2,50 | 23   | 2,39 | 0,95 |
| cyoB  | SMD_1214 | 1941 | 61,77 | 1214 | 2,19 | 1193 | 2,09 | 0,95 |
| nuoF  | SMD_2975 | 1341 | 65,03 | 1123 | 2,01 | 1127 | 1,91 | 0,95 |
| phnA  | SMD_3089 | 336  | 61,90 | 376  | 2,64 | 471  | 2,51 | 0,95 |
| icd   | SMD_3868 | 2223 | 66,31 | 311  | 2,89 | 314  | 2,75 | 0,95 |
| -     | SMD_3670 | 2097 | 66,29 | 159  | 2,51 | 151  | 2,39 | 0,95 |
| atpD  | SMD_3698 | 1407 | 64,04 | 1636 | 2,09 | 1778 | 1,99 | 0,95 |

|       |          |      |       |      |      |      |      |      |
|-------|----------|------|-------|------|------|------|------|------|
| yhbH  | SMD_1033 | 318  | 61,64 | 412  | 2,73 | 579  | 2,59 | 0,95 |
| cusA2 | SMD_2139 | 3126 | 63,28 | 138  | 2,03 | 177  | 1,93 | 0,95 |
| tolQ  | SMD_3313 | 780  | 66,79 | 185  | 2,91 | 221  | 2,77 | 0,95 |
| pilE  | SMD_1452 | 408  | 63,73 | 63   | 2,36 | 51   | 2,24 | 0,95 |
| minE  | SMD_1166 | 261  | 60,54 | 559  | 2,28 | 724  | 2,16 | 0,95 |
| -     | SMD_4064 | 948  | 65,82 | 132  | 3,64 | 126  | 3,45 | 0,95 |
| bioA  | SMD_3231 | 1392 | 70,11 | 75   | 2,88 | 73   | 2,74 | 0,95 |
| -     | SMD_2841 | 1155 | 66,67 | 134  | 2,65 | 137  | 2,51 | 0,95 |
| gltB  | SMD_0064 | 4389 | 68,33 | 27   | 3,18 | 41   | 3,01 | 0,95 |
| gcvH  | SMD_3224 | 396  | 63,64 | 789  | 2,44 | 796  | 2,32 | 0,95 |
| rnc   | SMD_3126 | 681  | 66,81 | 179  | 2,24 | 146  | 2,13 | 0,95 |
| -     | SMD_2800 | 1518 | 66,01 | 283  | 2,57 | 257  | 2,44 | 0,95 |
| wbpL  | SMD_1843 | 990  | 64,95 | 113  | 2,88 | 117  | 2,73 | 0,95 |
| -     | SMD_3678 | 795  | 70,31 | 53   | 2,71 | 43   | 2,57 | 0,95 |
| sspA  | SMD_1433 | 618  | 63,92 | 154  | 2,57 | 214  | 2,43 | 0,95 |
| -     | SMD_1710 | 516  | 67,64 | 422  | 2,51 | 494  | 2,38 | 0,95 |
| atpA  | SMD_3700 | 1548 | 64,66 | 1772 | 2,29 | 1762 | 2,17 | 0,95 |
| -     | SMD_4071 | 375  | 69,07 | 111  | 3,35 | 111  | 3,17 | 0,95 |
| -     | SMD_0309 | 573  | 61,26 | 7685 | 2,84 | 6844 | 2,69 | 0,95 |
| -     | SMD_0153 | 576  | 62,85 | 661  | 5,58 | 833  | 5,27 | 0,95 |
| -     | SMD_1524 | 234  | 64,53 | 1    | 1,64 | 2    | 1,55 | 0,95 |
| -     | SMD_2146 | 1272 | 66,35 | 38   | 2,32 | 65   | 2,19 | 0,94 |
| -     | SMD_3781 | 765  | 69,02 | 148  | 4,28 | 151  | 4,04 | 0,94 |
| ftsA  | SMD_0647 | 1236 | 68,37 | 221  | 1,93 | 251  | 1,82 | 0,94 |
| -     | SMD_2628 | 537  | 65,18 | 73   | 3,35 | 71   | 3,17 | 0,94 |
| -     | SMD_4028 | 690  | 71,01 | 63   | 3,38 | 56   | 3,19 | 0,94 |
| -     | SMD_3326 | 1215 | 68,31 | 36   | 3,79 | 42   | 3,58 | 0,94 |
| -     | SMD_3479 | 945  | 65,08 | 66   | 3,27 | 76   | 3,08 | 0,94 |
| -     | SMD_1835 | 1038 | 67,73 | 93   | 2,90 | 69   | 2,74 | 0,94 |
| glyA  | SMD_0607 | 1254 | 66,27 | 395  | 3,32 | 381  | 3,13 | 0,94 |
| -     | SMD_0122 | 468  | 69,44 | 163  | 5,11 | 162  | 4,81 | 0,94 |
| -     | SMD_0082 | 984  | 69,72 | 38   | 2,54 | 35   | 2,39 | 0,94 |
| glmS  | SMD_3685 | 1839 | 66,83 | 179  | 2,74 | 177  | 2,58 | 0,94 |
| btuE  | SMD_4218 | 546  | 67,03 | 217  | 2,32 | 215  | 2,18 | 0,94 |
| -     | SMD_3830 | 828  | 70,53 | 21   | 4,11 | 21   | 3,87 | 0,94 |
| metH2 | SMD_2753 | 1092 | 68,22 | 48   | 3,25 | 45   | 3,05 | 0,94 |
| -     | SMD_3376 | 1854 | 67,53 | 176  | 2,56 | 185  | 2,41 | 0,94 |
| -     | SMD_1173 | 372  | 68,55 | 54   | 2,38 | 45   | 2,24 | 0,94 |
| -     | SMD_3030 | 2106 | 65,24 | 198  | 2,18 | 159  | 2,05 | 0,94 |
| tatB  | SMD_4172 | 453  | 69,32 | 161  | 3,95 | 185  | 3,71 | 0,94 |
| mmsB  | SMD_0233 | 891  | 68,13 | 92   | 2,94 | 111  | 2,77 | 0,94 |
| -     | SMD_0139 | 864  | 65,74 | 21   | 3,15 | 19   | 2,96 | 0,94 |
| tdh   | SMD_0835 | 1038 | 64,16 | 211  | 2,57 | 219  | 2,41 | 0,94 |
| -     | SMD_4150 | 252  | 61,11 | 181  | 3,29 | 173  | 3,09 | 0,94 |
| arcA  | SMD_0276 | 921  | 67,32 | 138  | 2,59 | 85   | 2,43 | 0,94 |
| -     | SMD_2920 | 1791 | 68,45 | 63   | 2,68 | 76   | 2,52 | 0,94 |
| -     | SMD_0475 | 276  | 71,74 | 171  | 2,72 | 172  | 2,55 | 0,94 |
| -     | SMD_2110 | 1125 | 66,93 | 49   | 3,55 | 51   | 3,33 | 0,94 |
| DLAT  | SMD_3709 | 1329 | 66,59 | 516  | 2,81 | 514  | 2,64 | 0,94 |
| -     | SMD_1748 | 492  | 63,62 | 775  | 2,26 | 735  | 2,12 | 0,94 |
| -     | SMD_0533 | 921  | 60,59 | 519  | 1,96 | 475  | 1,84 | 0,94 |
| truC  | SMD_0188 | 744  | 70,30 | 111  | 3,99 | 85   | 3,75 | 0,94 |
| -     | SMD_1064 | 519  | 68,59 | 99   | 2,78 | 113  | 2,61 | 0,94 |
| -     | SMD_1300 | 1071 | 65,08 | 47   | 3,86 | 45   | 3,62 | 0,94 |
| speD  | SMD_3899 | 795  | 56,35 | 1165 | 2,79 | 1114 | 2,61 | 0,94 |
| -     | SMD_4145 | 759  | 64,30 | 126  | 2,67 | 111  | 2,50 | 0,94 |
| rpmA  | SMD_1192 | 264  | 65,53 | 2971 | 2,46 | 2579 | 2,31 | 0,94 |
| metC  | SMD_0528 | 1173 | 66,50 | 212  | 2,64 | 248  | 2,47 | 0,94 |
| rpfG  | SMD_2014 | 1062 | 65,54 | 121  | 2,61 | 126  | 2,45 | 0,94 |
| speE  | SMD_3952 | 855  | 63,98 | 253  | 2,67 | 227  | 2,50 | 0,94 |
| sahH  | SMD_0664 | 1446 | 63,62 | 1189 | 2,37 | 916  | 2,22 | 0,94 |
| -     | SMD_0206 | 1611 | 67,97 | 215  | 2,19 | 196  | 2,05 | 0,94 |
| -     | SMD_4052 | 591  | 62,94 | 198  | 2,88 | 223  | 2,69 | 0,94 |
| panC  | SMD_1717 | 840  | 68,10 | 169  | 2,78 | 153  | 2,60 | 0,94 |
| -     | SMD_3693 | 471  | 67,09 | 71   | 2,99 | 87   | 2,80 | 0,94 |

|        |          |      |       |      |      |      |      |      |
|--------|----------|------|-------|------|------|------|------|------|
| tuf2   | SMD_0783 | 1191 | 64,15 | 3943 | 2,18 | 4639 | 2,04 | 0,93 |
| -      | SMD_3954 | 792  | 64,77 | 1    | 3,14 | 1    | 2,94 | 0,93 |
| motB2  | SMD_2041 | 1017 | 69,12 | 55   | 2,57 | 26   | 2,40 | 0,93 |
| -      | SMD_0914 | 1257 | 64,28 | 25   | 2,89 | 36   | 2,70 | 0,93 |
| rpsF   | SMD_2728 | 438  | 62,10 | 3321 | 2,46 | 2871 | 2,30 | 0,93 |
| atpF   | SMD_3702 | 522  | 61,69 | 1461 | 2,62 | 1517 | 2,45 | 0,93 |
| rpsK   | SMD_0807 | 390  | 63,08 | 4682 | 2,16 | 3883 | 2,02 | 0,93 |
| -      | SMD_1305 | 1539 | 66,34 | 43   | 3,57 | 32   | 3,33 | 0,93 |
| -      | SMD_0660 | 486  | 66,67 | 33   | 3,42 | 45   | 3,20 | 0,93 |
| dapD   | SMD_1347 | 1080 | 67,04 | 231  | 2,12 | 232  | 1,98 | 0,93 |
| -      | SMD_3463 | 549  | 69,03 | 175  | 2,57 | 182  | 2,39 | 0,93 |
| -      | SMD_1374 | 4614 | 70,63 | 24   | 3,10 | 21   | 2,89 | 0,93 |
| bfr2   | SMD_3890 | 471  | 58,60 | 219  | 3,36 | 211  | 3,13 | 0,93 |
| pepA   | SMD_0569 | 1479 | 70,72 | 269  | 2,92 | 274  | 2,72 | 0,93 |
| hmsS   | SMD_2864 | 471  | 68,37 | 17   | 2,24 | 19   | 2,08 | 0,93 |
| ampDII | SMD_0107 | 822  | 66,79 | 59   | 3,61 | 54   | 3,36 | 0,93 |
| map    | SMD_1345 | 843  | 64,53 | 488  | 2,41 | 414  | 2,24 | 0,93 |
| -      | SMD_1056 | 1494 | 67,07 | 248  | 2,51 | 267  | 2,34 | 0,93 |
| cyoC   | SMD_1215 | 639  | 63,54 | 1134 | 2,14 | 918  | 1,99 | 0,93 |
| sufD   | SMD_1076 | 1242 | 70,61 | 93   | 2,56 | 76   | 2,38 | 0,93 |
| nuoE   | SMD_2976 | 528  | 64,02 | 1132 | 1,97 | 886  | 1,83 | 0,93 |
| panB   | SMD_1716 | 816  | 68,26 | 194  | 2,68 | 212  | 2,49 | 0,93 |
| plsC   | SMD_0096 | 750  | 67,87 | 166  | 4,11 | 164  | 3,81 | 0,93 |
| -      | SMD_0173 | 2850 | 68,00 | 64   | 2,95 | 75   | 2,74 | 0,93 |
| -      | SMD_3442 | 387  | 68,22 | 548  | 2,90 | 428  | 2,69 | 0,93 |
| -      | SMD_3540 | 735  | 68,03 | 191  | 3,02 | 191  | 2,80 | 0,93 |
| -      | SMD_1037 | 576  | 67,01 | 81   | 2,41 | 92   | 2,24 | 0,93 |
| rpsU   | SMD_0374 | 216  | 63,89 | 3177 | 3,49 | 3651 | 3,23 | 0,93 |
| -      | SMD_3352 | 1203 | 69,99 | 15   | 3,23 | 16   | 3,00 | 0,93 |
| ppa    | SMD_3505 | 537  | 64,99 | 852  | 2,49 | 842  | 2,30 | 0,93 |
| flgJ   | SMD_2078 | 1203 | 65,50 | 71   | 2,04 | 51   | 1,89 | 0,93 |
| pepQ   | SMD_3461 | 1332 | 67,49 | 99   | 2,96 | 112  | 2,74 | 0,93 |
| -      | SMD_3826 | 927  | 68,39 | 18   | 6,44 | 23   | 5,96 | 0,93 |
| -      | SMD_1968 | 1227 | 65,44 | 178  | 2,01 | 157  | 1,86 | 0,93 |
| cysS   | SMD_2877 | 1377 | 68,85 | 166  | 3,21 | 168  | 2,97 | 0,92 |
| -      | SMD_0977 | 783  | 66,92 | 189  | 3,48 | 133  | 3,22 | 0,92 |
| fimA   | SMD_0595 | 540  | 65,56 | 3141 | 2,45 | 2193 | 2,27 | 0,92 |
| -      | SMD_4200 | 702  | 68,80 | 126  | 2,65 | 119  | 2,45 | 0,92 |
| -      | SMD_3852 | 843  | 66,31 | 158  | 2,71 | 215  | 2,50 | 0,92 |
| -      | SMD_0662 | 1344 | 66,22 | 27   | 3,30 | 36   | 3,05 | 0,92 |
| bglX   | SMD_0379 | 2175 | 68,69 | 59   | 2,56 | 61   | 2,36 | 0,92 |
| -      | SMD_0252 | 3489 | 65,86 | 16   | 3,40 | 8    | 3,14 | 0,92 |
| -      | SMD_0491 | 684  | 70,47 | 169  | 2,38 | 168  | 2,20 | 0,92 |
| -      | SMD_1789 | 1308 | 71,87 | 9    | 3,32 | 6    | 3,06 | 0,92 |
| -      | SMD_3871 | 819  | 68,38 | 125  | 3,71 | 99   | 3,42 | 0,92 |
| sugE2  | SMD_3898 | 321  | 64,17 | 179  | 3,24 | 134  | 2,99 | 0,92 |
| -      | SMD_2624 | 654  | 61,47 | 83   | 2,89 | 98   | 2,66 | 0,92 |
| tgt    | SMD_1809 | 1131 | 68,79 | 98   | 2,83 | 86   | 2,61 | 0,92 |
| ribH   | SMD_0617 | 468  | 69,02 | 249  | 3,30 | 229  | 3,04 | 0,92 |
| -      | SMD_2633 | 267  | 55,43 | 546  | 2,12 | 717  | 1,96 | 0,92 |
| ubiE   | SMD_3651 | 762  | 65,49 | 413  | 3,67 | 391  | 3,38 | 0,92 |
| -      | SMD_3387 | 987  | 68,49 | 21   | 2,76 | 25   | 2,54 | 0,92 |
| flhF   | SMD_2048 | 1617 | 71,68 | 48   | 2,29 | 31   | 2,11 | 0,92 |
| birA   | SMD_0265 | 969  | 70,59 | 119  | 4,21 | 115  | 3,87 | 0,92 |
| -      | SMD_1741 | 270  | 63,33 | 66   | 2,86 | 62   | 2,63 | 0,92 |
| -      | SMD_2100 | 615  | 69,43 | 96   | 2,33 | 113  | 2,14 | 0,92 |
| kdsB   | SMD_1468 | 774  | 70,03 | 64   | 2,28 | 82   | 2,10 | 0,92 |
| -      | SMD_0970 | 924  | 69,59 | 21   | 3,12 | 32   | 2,87 | 0,92 |
| smeE   | SMD_3657 | 3123 | 65,19 | 321  | 2,74 | 447  | 2,51 | 0,92 |
| -      | SMD_1188 | 726  | 64,88 | 147  | 2,52 | 142  | 2,31 | 0,92 |
| rplJ   | SMD_0776 | 597  | 63,48 | 7422 | 3,25 | 5882 | 2,98 | 0,92 |
| sucB   | SMD_2775 | 1203 | 66,83 | 912  | 2,21 | 925  | 2,02 | 0,92 |
| smeG   | SMD_2748 | 1269 | 69,98 | 183  | 2,39 | 263  | 2,19 | 0,92 |
| rpmH   | SMD_4239 | 141  | 65,96 | 2298 | 3,84 | 2166 | 3,52 | 0,92 |
| mtaP   | SMD_3117 | 747  | 67,74 | 121  | 2,88 | 129  | 2,63 | 0,92 |

|      |          |      |       |      |      |      |      |      |
|------|----------|------|-------|------|------|------|------|------|
| rarD | SMD_0287 | 897  | 65,55 | 58   | 3,41 | 43   | 3,13 | 0,92 |
| -    | SMD_0759 | 3309 | 68,96 | 7    | 3,86 | 3    | 3,53 | 0,92 |
| -    | SMD_0348 | 1710 | 66,43 | 131  | 2,22 | 123  | 2,03 | 0,92 |
| -    | SMD_2164 | 468  | 65,17 | 48   | 1,49 | 38   | 1,36 | 0,91 |
| -    | SMD_0245 | 1077 | 64,16 | 14   | 3,45 | 11   | 3,16 | 0,91 |
| fliS | SMD_2073 | 417  | 68,59 | 178  | 2,21 | 117  | 2,02 | 0,91 |
| hrpB | SMD_4070 | 2505 | 72,14 | 33   | 3,65 | 31   | 3,34 | 0,91 |
| -    | SMD_1251 | 885  | 67,46 | 176  | 2,32 | 121  | 2,12 | 0,91 |
| -    | SMD_4217 | 1011 | 68,55 | 172  | 2,68 | 177  | 2,45 | 0,91 |
| -    | SMD_0408 | 402  | 70,90 | 41   | 3,44 | 29   | 3,14 | 0,91 |
| rnfB | SMD_3082 | 414  | 69,32 | 77   | 2,72 | 112  | 2,48 | 0,91 |
| -    | SMD_2887 | 1344 | 67,63 | 182  | 2,46 | 164  | 2,24 | 0,91 |
| -    | SMD_0033 | 2271 | 66,18 | 129  | 3,07 | 117  | 2,79 | 0,91 |
| -    | SMD_0752 | 660  | 70,76 | 123  | 2,67 | 153  | 2,43 | 0,91 |
| ksgA | SMD_0699 | 804  | 67,29 | 124  | 2,65 | 135  | 2,41 | 0,91 |
| nth  | SMD_1387 | 693  | 67,53 | 41   | 1,52 | 59   | 1,39 | 0,91 |
| bmnA | SMD_1969 | 2619 | 67,12 | 29   | 2,28 | 27   | 2,06 | 0,91 |
| -    | SMD_3015 | 8289 | 66,64 | 11   | 3,21 | 5    | 2,91 | 0,91 |
| cyoA | SMD_1213 | 1041 | 61,29 | 1146 | 2,45 | 1131 | 2,22 | 0,91 |
| hupB | SMD_0873 | 273  | 60,44 | 3517 | 2,34 | 3612 | 2,12 | 0,91 |
| -    | SMD_2039 | 1266 | 71,80 | 31   | 2,51 | 21   | 2,27 | 0,90 |
| secB | SMD_0125 | 519  | 65,90 | 848  | 2,46 | 953  | 2,22 | 0,90 |
| trpD | SMD_3904 | 1032 | 67,83 | 51   | 2,95 | 53   | 2,66 | 0,90 |
| gcvP | SMD_3153 | 2868 | 67,43 | 185  | 2,73 | 184  | 2,47 | 0,90 |
| -    | SMD_3933 | 1389 | 71,06 | 258  | 2,14 | 257  | 1,93 | 0,90 |
| -    | SMD_0570 | 1089 | 68,87 | 84   | 4,10 | 96   | 3,70 | 0,90 |
| rnhB | SMD_1324 | 660  | 70,76 | 94   | 2,43 | 71   | 2,19 | 0,90 |
| -    | SMD_1865 | 1749 | 55,40 | 111  | 2,25 | 99   | 2,03 | 0,90 |
| -    | SMD_0990 | 381  | 60,89 | 21   | 2,61 | 32   | 2,35 | 0,90 |
| -    | SMD_3575 | 831  | 67,51 | 43   | 2,94 | 71   | 2,65 | 0,90 |
| -    | SMD_2070 | 639  | 68,23 | 124  | 3,37 | 96   | 3,03 | 0,90 |
| -    | SMD_1234 | 240  | 67,50 | 61   | 5,01 | 67   | 4,51 | 0,90 |
| -    | SMD_1070 | 2295 | 65,71 | 326  | 2,38 | 277  | 2,13 | 0,90 |
| -    | SMD_2253 | 903  | 65,89 | 54   | 3,20 | 41   | 2,86 | 0,90 |
| yqgE | SMD_1021 | 567  | 67,90 | 238  | 3,96 | 245  | 3,54 | 0,90 |
| rplI | SMD_2726 | 450  | 66,22 | 2324 | 2,96 | 2159 | 2,65 | 0,90 |
| mnmA | SMD_2101 | 1128 | 68,44 | 135  | 2,49 | 137  | 2,23 | 0,89 |
| rplU | SMD_1191 | 309  | 59,22 | 4163 | 2,45 | 3571 | 2,19 | 0,89 |
| -    | SMD_3027 | 2790 | 63,76 | 1131 | 3,06 | 854  | 2,73 | 0,89 |
| -    | SMD_3676 | 483  | 62,53 | 289  | 2,55 | 275  | 2,28 | 0,89 |
| -    | SMD_2796 | 1155 | 66,58 | 72   | 2,96 | 79   | 2,64 | 0,89 |
| -    | SMD_2072 | 294  | 68,37 | 115  | 2,49 | 65   | 2,22 | 0,89 |
| ftsZ | SMD_0648 | 1236 | 67,23 | 384  | 3,28 | 444  | 2,92 | 0,89 |
| ubiH | SMD_0706 | 1209 | 71,79 | 113  | 3,17 | 118  | 2,82 | 0,89 |
| cmk  | SMD_1838 | 678  | 66,08 | 751  | 2,62 | 744  | 2,33 | 0,89 |
| -    | SMD_0269 | 864  | 65,74 | 18   | 3,61 | 16   | 3,22 | 0,89 |
| ruvC | SMD_3318 | 522  | 67,62 | 173  | 2,68 | 168  | 2,39 | 0,89 |
| -    | SMD_1592 | 267  | 67,42 | 12   | 3,54 | 2    | 3,16 | 0,89 |
| apaH | SMD_0697 | 1017 | 70,11 | 181  | 2,74 | 156  | 2,44 | 0,89 |
| crt2 | SMD_1389 | 783  | 70,11 | 69   | 3,48 | 69   | 3,09 | 0,89 |
| -    | SMD_0828 | 1020 | 68,24 | 31   | 4,65 | 47   | 4,13 | 0,89 |
| codA | SMD_3652 | 453  | 67,55 | 89   | 3,19 | 79   | 2,83 | 0,89 |
| -    | SMD_0381 | 1167 | 67,87 | 47   | 3,40 | 42   | 3,03 | 0,89 |
| fimU | SMD_1447 | 474  | 65,19 | 113  | 3,62 | 72   | 3,22 | 0,89 |
| -    | SMD_2576 | 903  | 66,78 | 59   | 2,64 | 45   | 2,34 | 0,89 |
| -    | SMD_4006 | 1779 | 68,58 | 19   | 3,96 | 15   | 3,50 | 0,89 |
| -    | SMD_3880 | 279  | 65,95 | 794  | 2,74 | 891  | 2,42 | 0,89 |
| -    | SMD_0090 | 1485 | 69,70 | 41   | 3,75 | 41   | 3,32 | 0,89 |
| -    | SMD_1846 | 1209 | 68,40 | 112  | 2,27 | 119  | 2,00 | 0,88 |
| -    | SMD_0711 | 723  | 68,05 | 34   | 2,83 | 23   | 2,50 | 0,88 |
| -    | SMD_0297 | 1368 | 70,54 | 222  | 3,26 | 231  | 2,88 | 0,88 |
| msrB | SMD_0479 | 468  | 69,23 | 16   | 3,43 | 47   | 3,03 | 0,88 |
| -    | SMD_2540 | 660  | 70,15 | 51   | 3,15 | 62   | 2,78 | 0,88 |
| etfB | SMD_0543 | 747  | 66,53 | 321  | 2,59 | 413  | 2,29 | 0,88 |
| -    | SMD_0608 | 420  | 69,52 | 114  | 2,77 | 86   | 2,45 | 0,88 |

|      |          |      |       |      |      |      |      |      |
|------|----------|------|-------|------|------|------|------|------|
| rhIB | SMD_3855 | 1782 | 68,74 | 269  | 3,22 | 257  | 2,84 | 0,88 |
| -    | SMD_1446 | 1395 | 67,46 | 169  | 2,63 | 159  | 2,31 | 0,88 |
| -    | SMD_1057 | 297  | 65,99 | 4251 | 9,92 | 2712 | 8,73 | 0,88 |
| -    | SMD_3417 | 1320 | 65,23 | 117  | 2,24 | 119  | 1,97 | 0,88 |
| smmQ | SMD_4140 | 3210 | 67,26 | 41   | 2,86 | 63   | 2,52 | 0,88 |
| -    | SMD_3081 | 606  | 64,69 | 159  | 3,02 | 157  | 2,66 | 0,88 |
| -    | SMD_0883 | 981  | 58,21 | 113  | 3,93 | 123  | 3,45 | 0,88 |
| trxB | SMD_2112 | 972  | 68,11 | 195  | 2,85 | 231  | 2,50 | 0,88 |
| -    | SMD_2806 | 2169 | 64,50 | 395  | 2,84 | 419  | 2,50 | 0,88 |
| asd  | SMD_3003 | 1029 | 65,79 | 223  | 2,80 | 239  | 2,46 | 0,88 |
| fpr  | SMD_2804 | 780  | 64,62 | 291  | 3,01 | 288  | 2,63 | 0,88 |
| -    | SMD_1918 | 729  | 69,82 | 78   | 2,48 | 85   | 2,17 | 0,88 |
| fliH | SMD_2062 | 642  | 71,03 | 62   | 2,36 | 43   | 2,06 | 0,87 |
| xerC | SMD_3663 | 897  | 69,90 | 88   | 2,72 | 89   | 2,38 | 0,87 |
| -    | SMD_1593 | 651  | 66,05 | 4    | 4,07 | 5    | 3,56 | 0,87 |
| -    | SMD_3393 | 2064 | 68,17 | 37   | 3,46 | 35   | 3,02 | 0,87 |
| pyrG | SMD_1651 | 1665 | 65,95 | 253  | 2,75 | 237  | 2,40 | 0,87 |
| efp  | SMD_2888 | 567  | 62,26 | 923  | 2,61 | 836  | 2,28 | 0,87 |
| -    | SMD_1336 | 1539 | 70,57 | 146  | 3,63 | 164  | 3,17 | 0,87 |
| -    | SMD_2316 | 1080 | 67,31 | 48   | 2,96 | 27   | 2,58 | 0,87 |
| -    | SMD_1585 | 915  | 68,96 | 113  | 2,38 | 98   | 2,07 | 0,87 |
| -    | SMD_2338 | 1197 | 67,08 | 71   | 2,62 | 45   | 2,28 | 0,87 |
| -    | SMD_0305 | 816  | 63,48 | 796  | 2,10 | 1176 | 1,82 | 0,87 |
| -    | SMD_1731 | 876  | 70,09 | 75   | 3,76 | 83   | 3,26 | 0,87 |
| -    | SMD_3839 | 768  | 72,79 | 63   | 3,96 | 55   | 3,43 | 0,87 |
| -    | SMD_4116 | 561  | 70,23 | 26   | 3,48 | 19   | 3,02 | 0,87 |
| -    | SMD_0476 | 489  | 64,21 | 584  | 2,46 | 521  | 2,13 | 0,87 |
| murD | SMD_1091 | 1410 | 69,50 | 118  | 2,19 | 113  | 1,89 | 0,87 |
| rplD | SMD_0786 | 606  | 63,04 | 6444 | 3,34 | 5939 | 2,88 | 0,86 |
| selA | SMD_3450 | 1425 | 69,82 | 21   | 4,09 | 28   | 3,53 | 0,86 |
| -    | SMD_2740 | 687  | 67,39 | 62   | 2,45 | 61   | 2,11 | 0,86 |
| pyrF | SMD_0054 | 726  | 69,42 | 213  | 3,32 | 168  | 2,86 | 0,86 |
| truD | SMD_1659 | 1032 | 68,41 | 81   | 2,30 | 77   | 1,98 | 0,86 |
| -    | SMD_2120 | 1269 | 67,22 | 16   | 2,92 | 9    | 2,52 | 0,86 |
| emrA | SMD_1360 | 1182 | 68,02 | 54   | 2,72 | 168  | 2,34 | 0,86 |
| -    | SMD_0191 | 603  | 66,17 | 119  | 3,80 | 94   | 3,27 | 0,86 |
| -    | SMD_1080 | 468  | 62,82 | 152  | 4,01 | 175  | 3,45 | 0,86 |
| proA | SMD_2865 | 1272 | 68,71 | 41   | 2,72 | 35   | 2,34 | 0,86 |
| rplN | SMD_0795 | 369  | 59,89 | 7188 | 3,34 | 6277 | 2,87 | 0,86 |
| rpmE | SMD_3439 | 243  | 56,79 | 2219 | 2,68 | 1911 | 2,30 | 0,86 |
| -    | SMD_4045 | 918  | 68,63 | 117  | 3,75 | 95   | 3,21 | 0,86 |
| flgC | SMD_2087 | 408  | 64,46 | 87   | 2,26 | 31   | 1,93 | 0,85 |
| acrD | SMD_2749 | 3174 | 64,71 | 281  | 2,19 | 385  | 1,87 | 0,85 |
| -    | SMD_1790 | 918  | 68,63 | 31   | 3,21 | 27   | 2,73 | 0,85 |
| -    | SMD_0965 | 321  | 62,93 | 318  | 2,65 | 481  | 2,26 | 0,85 |
| -    | SMD_4118 | 1614 | 70,94 | 33   | 3,86 | 21   | 3,29 | 0,85 |
| holB | SMD_0985 | 957  | 68,76 | 112  | 2,29 | 117  | 1,95 | 0,85 |
| hutH | SMD_2691 | 1542 | 69,07 | 18   | 3,58 | 26   | 3,05 | 0,85 |
| tag  | SMD_1019 | 546  | 66,67 | 56   | 3,75 | 43   | 3,19 | 0,85 |
| -    | SMD_3106 | 1176 | 68,03 | 146  | 2,94 | 152  | 2,51 | 0,85 |
| metK | SMD_0668 | 1212 | 65,35 | 323  | 2,61 | 341  | 2,22 | 0,85 |
| ispB | SMD_1096 | 999  | 69,57 | 241  | 3,51 | 226  | 2,98 | 0,85 |
| vdh  | SMD_3104 | 1098 | 65,76 | 115  | 3,24 | 84   | 2,75 | 0,85 |
| -    | SMD_4089 | 426  | 66,90 | 98   | 2,25 | 72   | 1,91 | 0,85 |
| flgG | SMD_2083 | 786  | 63,61 | 112  | 2,17 | 75   | 1,84 | 0,85 |
| -    | SMD_3107 | 342  | 69,01 | 6122 | 4,25 | 5945 | 3,60 | 0,85 |
| rplX | SMD_0796 | 318  | 62,89 | 7437 | 3,43 | 6528 | 2,90 | 0,85 |
| -    | SMD_2987 | 858  | 66,32 | 111  | 2,57 | 92   | 2,18 | 0,85 |
| -    | SMD_2390 | 927  | 69,15 | 16   | 3,74 | 15   | 3,16 | 0,85 |
| truB | SMD_2960 | 909  | 70,74 | 93   | 2,38 | 74   | 2,01 | 0,84 |
| rplC | SMD_0785 | 651  | 65,13 | 6711 | 3,53 | 5925 | 2,98 | 0,84 |
| cspD | SMD_3116 | 207  | 62,80 | 1443 | 2,34 | 1519 | 1,97 | 0,84 |
| pfk  | SMD_3490 | 1257 | 69,29 | 46   | 3,77 | 65   | 3,17 | 0,84 |
| cydA | SMD_2855 | 1590 | 63,65 | 1861 | 2,61 | 1688 | 2,20 | 0,84 |
| -    | SMD_1886 | 945  | 67,83 | 11   | 3,71 | 14   | 3,12 | 0,84 |



|       |          |      |       |      |      |      |      |      |
|-------|----------|------|-------|------|------|------|------|------|
| smeM  | SMD_3392 | 1107 | 68,56 | 31   | 3,16 | 29   | 2,66 | 0,84 |
| fleN  | SMD_2047 | 888  | 69,03 | 96   | 2,45 | 72   | 2,06 | 0,84 |
| -     | SMD_3586 | 1059 | 66,19 | 51   | 2,45 | 81   | 2,06 | 0,84 |
| flgL  | SMD_2079 | 1881 | 67,41 | 86   | 2,23 | 49   | 1,88 | 0,84 |
| -     | SMD_1359 | 1494 | 71,15 | 34   | 3,30 | 94   | 2,77 | 0,84 |
| -     | SMD_0118 | 1281 | 67,68 | 133  | 4,30 | 166  | 3,61 | 0,84 |
| -     | SMD_2299 | 1302 | 64,13 | 84   | 2,73 | 88   | 2,29 | 0,84 |
| -     | SMD_1464 | 663  | 69,38 | 161  | 3,54 | 168  | 2,97 | 0,84 |
| -     | SMD_3613 | 1029 | 69,48 | 46   | 2,62 | 51   | 2,20 | 0,84 |
| -     | SMD_4095 | 1251 | 66,59 | 65   | 2,52 | 57   | 2,11 | 0,84 |
| adhC  | SMD_3577 | 1110 | 65,50 | 121  | 3,10 | 161  | 2,60 | 0,84 |
| -     | SMD_3595 | 738  | 69,11 | 139  | 2,80 | 154  | 2,34 | 0,84 |
| -     | SMD_0288 | 2826 | 65,85 | 681  | 3,15 | 413  | 2,64 | 0,84 |
| -     | SMD_0349 | 663  | 66,37 | 111  | 2,38 | 121  | 1,99 | 0,84 |
| -     | SMD_1354 | 2307 | 70,48 | 21   | 3,63 | 21   | 3,03 | 0,84 |
| -     | SMD_0101 | 828  | 67,51 | 273  | 2,84 | 285  | 2,37 | 0,83 |
| rpsC  | SMD_0791 | 735  | 62,59 | 6582 | 3,55 | 5759 | 2,95 | 0,83 |
| nuol  | SMD_2972 | 489  | 61,15 | 738  | 1,99 | 615  | 1,66 | 0,83 |
| -     | SMD_1644 | 627  | 64,11 | 296  | 2,64 | 299  | 2,20 | 0,83 |
| -     | SMD_0099 | 612  | 68,30 | 179  | 4,11 | 152  | 3,41 | 0,83 |
| -     | SMD_1981 | 717  | 69,04 | 46   | 3,01 | 56   | 2,50 | 0,83 |
| -     | SMD_3876 | 2178 | 68,50 | 25   | 3,55 | 25   | 2,95 | 0,83 |
| smmD2 | SMD_1476 | 1074 | 65,74 | 14   | 3,39 | 9    | 2,81 | 0,83 |
| rpsQ  | SMD_0794 | 270  | 57,78 | 8574 | 3,43 | 7394 | 2,84 | 0,83 |
| -     | SMD_0232 | 1176 | 66,92 | 133  | 2,56 | 171  | 2,11 | 0,83 |
| -     | SMD_1866 | 1077 | 50,60 | 87   | 2,27 | 75   | 1,87 | 0,83 |
| rpmC  | SMD_0793 | 186  | 57,53 | 8653 | 3,41 | 7849 | 2,81 | 0,82 |
| -     | SMD_3073 | 1317 | 70,39 | 18   | 3,41 | 24   | 2,81 | 0,82 |
| -     | SMD_1368 | 483  | 68,94 | 48   | 2,07 | 55   | 1,70 | 0,82 |
| -     | SMD_0650 | 957  | 66,67 | 125  | 3,42 | 215  | 2,81 | 0,82 |
| rplE  | SMD_0797 | 543  | 58,01 | 9681 | 3,48 | 8561 | 2,86 | 0,82 |
| rplV  | SMD_0790 | 336  | 61,90 | 6466 | 3,58 | 5896 | 2,94 | 0,82 |
| -     | SMD_0455 | 1101 | 66,94 | 271  | 2,81 | 129  | 2,30 | 0,82 |
| phaD  | SMD_3916 | 1536 | 68,95 | 45   | 3,08 | 32   | 2,51 | 0,82 |
| -     | SMD_3320 | 618  | 72,17 | 83   | 3,15 | 76   | 2,58 | 0,82 |
| recX  | SMD_1679 | 492  | 69,11 | 153  | 2,97 | 174  | 2,42 | 0,82 |
| metE  | SMD_2261 | 1035 | 64,15 | 11   | 4,69 | 12   | 3,83 | 0,82 |
| flgA  | SMD_2090 | 657  | 68,65 | 35   | 1,86 | 18   | 1,51 | 0,81 |
| -     | SMD_4225 | 438  | 68,95 | 51   | 4,20 | 45   | 3,42 | 0,81 |
| -     | SMD_0513 | 348  | 68,10 | 31   | 3,43 | 36   | 2,79 | 0,81 |
| -     | SMD_0969 | 1950 | 70,56 | 11   | 3,25 | 21   | 2,65 | 0,81 |
| rplP  | SMD_0792 | 414  | 61,84 | 6713 | 3,51 | 5934 | 2,86 | 0,81 |
| -     | SMD_2984 | 936  | 65,17 | 324  | 2,92 | 314  | 2,37 | 0,81 |
| rlmH  | SMD_3061 | 471  | 67,30 | 82   | 3,47 | 57   | 2,82 | 0,81 |
| leuD  | SMD_3523 | 579  | 66,49 | 12   | 1,77 | 22   | 1,43 | 0,81 |
| rpsJ  | SMD_0784 | 312  | 61,22 | 8248 | 3,56 | 7251 | 2,88 | 0,81 |
| rplW  | SMD_0787 | 300  | 59,00 | 6842 | 3,57 | 6144 | 2,89 | 0,81 |
| -     | SMD_0178 | 1722 | 70,62 | 77   | 3,68 | 62   | 2,98 | 0,81 |
| ohr   | SMD_0234 | 426  | 67,14 | 62   | 3,88 | 47   | 3,14 | 0,81 |
| fpg   | SMD_0041 | 813  | 69,86 | 45   | 3,85 | 36   | 3,11 | 0,81 |
| -     | SMD_1232 | 408  | 65,69 | 18   | 4,29 | 21   | 3,47 | 0,81 |
| lepB2 | SMD_0195 | 627  | 69,22 | 18   | 4,59 | 31   | 3,71 | 0,81 |
| hemB  | SMD_4044 | 990  | 67,07 | 246  | 2,72 | 237  | 2,20 | 0,81 |
| apbE  | SMD_1062 | 1023 | 69,89 | 98   | 2,59 | 112  | 2,09 | 0,81 |
| -     | SMD_4174 | 894  | 68,79 | 161  | 5,37 | 221  | 4,33 | 0,81 |
| rplR  | SMD_0801 | 354  | 67,51 | 2959 | 2,77 | 2264 | 2,23 | 0,80 |
| -     | SMD_2741 | 981  | 69,62 | 39   | 3,09 | 47   | 2,48 | 0,80 |
| -     | SMD_1403 | 1464 | 68,24 | 125  | 3,03 | 79   | 2,44 | 0,80 |
| rplB  | SMD_0788 | 828  | 66,18 | 5814 | 3,55 | 5231 | 2,85 | 0,80 |
| -     | SMD_3339 | 1611 | 68,09 | 26   | 3,99 | 25   | 3,19 | 0,80 |
| -     | SMD_0830 | 507  | 68,05 | 213  | 5,37 | 229  | 4,29 | 0,80 |
| mtnD  | SMD_1971 | 558  | 65,77 | 157  | 3,29 | 151  | 2,62 | 0,80 |
| -     | SMD_1954 | 1590 | 67,11 | 71   | 3,16 | 66   | 2,51 | 0,80 |
| -     | SMD_1286 | 180  | 67,78 | 811  | 2,15 | 961  | 1,71 | 0,80 |
| -     | SMD_1032 | 426  | 71,83 | 74   | 3,34 | 129  | 2,65 | 0,79 |

|       |          |      |       |      |       |      |      |      |
|-------|----------|------|-------|------|-------|------|------|------|
| -     | SMD_3888 | 1788 | 69,91 | 81   | 3,92  | 113  | 3,11 | 0,79 |
| aroE  | SMD_4041 | 846  | 70,80 | 129  | 3,72  | 115  | 2,95 | 0,79 |
| -     | SMD_3018 | 354  | 63,56 | 15   | 3,83  | 6    | 3,03 | 0,79 |
| masA  | SMD_1970 | 696  | 66,24 | 158  | 2,92  | 188  | 2,31 | 0,79 |
| -     | SMD_3927 | 606  | 69,80 | 163  | 2,49  | 156  | 1,97 | 0,79 |
| smeD  | SMD_3658 | 1185 | 69,70 | 188  | 3,26  | 328  | 2,57 | 0,79 |
| -     | SMD_0552 | 588  | 69,05 | 75   | 2,60  | 81   | 2,05 | 0,79 |
| -     | SMD_0525 | 885  | 71,86 | 181  | 3,47  | 183  | 2,73 | 0,79 |
| flhA  | SMD_2049 | 2109 | 68,14 | 21   | 2,30  | 11   | 1,81 | 0,79 |
| acpP2 | SMD_4104 | 258  | 62,02 | 263  | 2,56  | 229  | 2,01 | 0,78 |
| -     | SMD_0306 | 687  | 70,89 | 32   | 2,67  | 21   | 2,09 | 0,78 |
| -     | SMD_3677 | 567  | 64,73 | 121  | 2,58  | 96   | 2,03 | 0,78 |
| ilvD  | SMD_4038 | 1839 | 68,95 | 31   | 3,36  | 36   | 2,63 | 0,78 |
| -     | SMD_0396 | 489  | 65,64 | 147  | 4,13  | 131  | 3,24 | 0,78 |
| -     | SMD_0962 | 1608 | 66,73 | 21   | 3,41  | 23   | 2,67 | 0,78 |
| -     | SMD_0446 | 1521 | 67,98 | 45   | 5,94  | 42   | 4,65 | 0,78 |
| -     | SMD_2479 | 657  | 68,95 | 86   | 2,57  | 74   | 2,01 | 0,78 |
| -     | SMD_3414 | 1953 | 68,10 | 42   | 6,36  | 45   | 4,97 | 0,78 |
| rpsS  | SMD_0789 | 270  | 57,78 | 8619 | 3,70  | 7692 | 2,89 | 0,78 |
| -     | SMD_2220 | 570  | 65,79 | 9    | 2,18  | 8    | 1,70 | 0,78 |
| rpmJ2 | SMD_1837 | 126  | 58,73 | 2152 | 2,68  | 2491 | 2,09 | 0,78 |
| ubiG  | SMD_2886 | 717  | 69,46 | 116  | 2,43  | 97   | 1,89 | 0,78 |
| -     | SMD_1420 | 576  | 69,10 | 46   | 3,04  | 43   | 2,37 | 0,78 |
| rpsN  | SMD_0798 | 306  | 63,40 | 6184 | 3,85  | 5638 | 2,99 | 0,78 |
| rpe   | SMD_3910 | 678  | 66,81 | 124  | 2,46  | 152  | 1,91 | 0,78 |
| -     | SMD_4032 | 987  | 68,79 | 58   | 2,44  | 52   | 1,89 | 0,78 |
| glnB3 | SMD_3957 | 339  | 62,24 | 139  | 3,42  | 188  | 2,65 | 0,78 |
| -     | SMD_0861 | 759  | 63,90 | 249  | 3,41  | 284  | 2,65 | 0,78 |
| -     | SMD_3717 | 777  | 65,51 | 258  | 3,48  | 253  | 2,69 | 0,77 |
| dsbB  | SMD_0811 | 507  | 68,05 | 121  | 3,45  | 91   | 2,65 | 0,77 |
| -     | SMD_0025 | 1029 | 67,54 | 3416 | 3,27  | 3433 | 2,51 | 0,77 |
| -     | SMD_2616 | 873  | 68,50 | 43   | 4,22  | 47   | 3,24 | 0,77 |
| hisA  | SMD_1951 | 735  | 70,61 | 15   | 2,35  | 17   | 1,80 | 0,77 |
| -     | SMD_3021 | 459  | 67,97 | 37   | 6,54  | 22   | 4,99 | 0,76 |
| prpB  | SMD_3182 | 939  | 65,81 | 121  | 2,47  | 86   | 1,88 | 0,76 |
| -     | SMD_0940 | 405  | 62,22 | 282  | 2,94  | 268  | 2,24 | 0,76 |
| -     | SMD_2035 | 2250 | 67,78 | 22   | 3,52  | 13   | 2,65 | 0,75 |
| def   | SMD_3777 | 513  | 62,77 | 248  | 3,56  | 284  | 2,68 | 0,75 |
| -     | SMD_3342 | 483  | 67,49 | 27   | 2,86  | 33   | 2,15 | 0,75 |
| -     | SMD_0281 | 297  | 69,70 | 83   | 3,88  | 95   | 2,91 | 0,75 |
| -     | SMD_0137 | 273  | 63,74 | 543  | 11,29 | 1129 | 8,40 | 0,74 |
| phzF  | SMD_1087 | 879  | 71,44 | 64   | 3,41  | 64   | 2,53 | 0,74 |
| sspB  | SMD_1434 | 453  | 67,77 | 237  | 3,19  | 212  | 2,34 | 0,73 |
| dsbA  | SMD_3593 | 657  | 69,71 | 81   | 3,50  | 98   | 2,53 | 0,72 |
| -     | SMD_3576 | 357  | 70,59 | 85   | 3,41  | 77   | 2,46 | 0,72 |
| -     | SMD_4208 | 399  | 64,41 | 61   | 3,47  | 38   | 2,50 | 0,72 |
| gst4  | SMD_2798 | 636  | 67,14 | 26   | 4,24  | 43   | 3,06 | 0,72 |
| -     | SMD_0406 | 591  | 67,34 | 81   | 4,01  | 68   | 2,88 | 0,72 |
| -     | SMD_2134 | 312  | 65,06 | 23   | 2,77  | 29   | 1,98 | 0,71 |
| -     | SMD_0428 | 681  | 69,16 | 25   | 3,85  | 23   | 2,74 | 0,71 |
| -     | SMD_1410 | 1398 | 67,53 | 34   | 2,48  | 39   | 1,75 | 0,71 |
| sodA2 | SMD_2474 | 630  | 66,51 | 18   | 3,88  | 21   | 2,74 | 0,70 |
| leuA  | SMD_3520 | 1587 | 67,55 | 11   | 3,50  | 11   | 2,46 | 0,70 |
| -     | SMD_3733 | 342  | 68,13 | 28   | 3,95  | 22   | 2,77 | 0,70 |
| -     | SMD_0464 | 588  | 69,56 | 17   | 3,00  | 18   | 2,10 | 0,70 |
| pcm   | SMD_1662 | 678  | 68,73 | 158  | 3,10  | 162  | 2,17 | 0,70 |
| -     | SMD_1836 | 330  | 67,88 | 93   | 3,07  | 63   | 2,14 | 0,70 |
| -     | SMD_1225 | 813  | 68,88 | 16   | 3,29  | 28   | 2,29 | 0,70 |
| -     | SMD_1043 | 684  | 64,91 | 96   | 2,89  | 94   | 2,01 | 0,70 |
| pssA2 | SMD_2607 | 615  | 65,85 | 67   | 3,31  | 69   | 2,30 | 0,70 |
| -     | SMD_3266 | 537  | 68,16 | 37   | 7,15  | 45   | 4,97 | 0,70 |
| -     | SMD_1249 | 213  | 68,08 | 86   | 5,52  | 74   | 3,83 | 0,69 |
| -     | SMD_3050 | 1368 | 70,03 | 33   | 2,30  | 31   | 1,57 | 0,68 |
| -     | SMD_2760 | 861  | 66,55 | 656  | 2,92  | 634  | 1,99 | 0,68 |
| -     | SMD_3827 | 561  | 68,81 | 85   | 5,12  | 69   | 3,49 | 0,68 |

|       |          |      |       |      |      |      |      |      |
|-------|----------|------|-------|------|------|------|------|------|
| -     | SMD_2488 | 978  | 68,20 | 15   | 3,33 | 36   | 2,26 | 0,68 |
| -     | SMD_2454 | 675  | 66,81 | 28   | 3,64 | 31   | 2,46 | 0,68 |
| -     | SMD_1351 | 885  | 67,68 | 19   | 2,35 | 19   | 1,57 | 0,67 |
| -     | SMD_2256 | 1152 | 65,89 | 8    | 2,94 | 11   | 1,96 | 0,67 |
| -     | SMD_1480 | 264  | 61,36 | 32   | 3,95 | 32   | 2,63 | 0,67 |
| pssA  | SMD_0562 | 777  | 68,34 | 231  | 4,56 | 227  | 3,03 | 0,67 |
| -     | SMD_3145 | 648  | 65,28 | 24   | 3,17 | 42   | 2,10 | 0,66 |
| -     | SMD_2684 | 276  | 67,03 | 76   | 3,38 | 96   | 2,23 | 0,66 |
| -     | SMD_4094 | 558  | 71,86 | 55   | 3,25 | 55   | 2,14 | 0,66 |
| -     | SMD_1506 | 633  | 64,93 | 45   | 4,01 | 61   | 2,63 | 0,66 |
| smg   | SMD_3780 | 474  | 63,50 | 297  | 4,84 | 333  | 3,16 | 0,65 |
| -     | SMD_2431 | 669  | 68,01 | 14   | 2,95 | 23   | 1,91 | 0,65 |
| pai2  | SMD_2734 | 639  | 69,17 | 74   | 3,37 | 87   | 2,18 | 0,65 |
| trbP  | SMD_2323 | 666  | 68,47 | 16   | 2,68 | 22   | 1,71 | 0,64 |
| -     | SMD_1379 | 354  | 68,64 | 31   | 9,52 | 29   | 6,07 | 0,64 |
| yfiF  | SMD_3388 | 834  | 73,62 | 62   | 2,91 | 63   | 1,84 | 0,63 |
| -     | SMD_0967 | 360  | 64,44 | 98   | 3,76 | 96   | 2,37 | 0,63 |
| -     | SMD_2575 | 435  | 67,59 | 22   | 3,84 | 16   | 2,41 | 0,63 |
| -     | SMD_3407 | 630  | 65,24 | 3751 | 3,75 | 4163 | 2,34 | 0,62 |
| bfr   | SMD_3173 | 576  | 63,89 | 42   | 2,97 | 49   | 1,84 | 0,62 |
| -     | SMD_2832 | 276  | 66,67 | 149  | 2,25 | 163  | 1,39 | 0,62 |
| hisF  | SMD_1952 | 777  | 66,80 | 22   | 2,50 | 21   | 1,52 | 0,61 |
| thiL  | SMD_0619 | 1026 | 69,49 | 88   | 3,48 | 73   | 2,10 | 0,60 |
| feoA  | SMD_1991 | 255  | 68,63 | 174  | 2,87 | 183  | 1,73 | 0,60 |
| -     | SMD_0254 | 228  | 54,82 | 26   | 3,93 | 5    | 2,36 | 0,60 |
| -     | SMD_2592 | 381  | 67,72 | 76   | 2,57 | 75   | 1,54 | 0,60 |
| -     | SMD_0161 | 408  | 67,65 | 115  | 8,12 | 89   | 4,80 | 0,59 |
| -     | SMD_0236 | 513  | 69,98 | 29   | 7,12 | 22   | 4,20 | 0,59 |
| -     | SMD_3032 | 495  | 61,82 | 24   | 2,83 | 12   | 1,62 | 0,57 |
| soxR  | SMD_1008 | 435  | 67,59 | 19   | 3,11 | 16   | 1,76 | 0,57 |
| -     | SMD_0692 | 495  | 68,28 | 17   | 3,28 | 21   | 1,84 | 0,56 |
| -     | SMD_3549 | 1176 | 68,96 | 215  | 3,24 | 274  | 1,81 | 0,56 |
| -     | SMD_1887 | 588  | 66,67 | 39   | 3,12 | 48   | 1,71 | 0,55 |
| moaA  | SMD_2441 | 981  | 69,62 | 32   | 3,08 | 36   | 1,67 | 0,54 |
| moaBC | SMD_2440 | 987  | 69,91 | 21   | 2,80 | 23   | 1,50 | 0,54 |
| cdh   | SMD_2539 | 765  | 69,02 | 51   | 3,59 | 58   | 1,92 | 0,54 |
| -     | SMD_2107 | 381  | 66,93 | 14   | 3,28 | 12   | 1,69 | 0,52 |
| -     | SMD_3325 | 642  | 67,76 | 61   | 3,16 | 76   | 1,60 | 0,51 |
| gcp   | SMD_0375 | 984  | 72,66 | 112  | 5,31 | 115  | 2,66 | 0,50 |
| agaS  | SMD_4001 | 1155 | 70,04 | 11   | 3,55 | 21   | 1,76 | 0,49 |
| -     | SMD_2071 | 579  | 71,85 | 83   | 3,02 | 39   | 1,40 | 0,46 |

**Table S2. Predicted operons and RNAs half-lives in *S. maltophilia* genome**

| Name  | Synonym  | D457                                          |                 | ALB001                                        |                 |
|-------|----------|-----------------------------------------------|-----------------|-----------------------------------------------|-----------------|
|       |          | Expression mid-exponential phase (RPKM) at t0 |                 | Expression mid-exponential phase (RPKM) at t0 |                 |
|       |          | rifampicin addition                           | Half-life (min) | rifampicin addition                           | Half-life (min) |
| dnaA  | SMD_0001 | 157                                           | 3,13            | 116                                           | 3,60            |
| dnaN  | SMD_0002 | 312                                           | 2,40            | 585                                           | 2,42            |
| recF  | SMD_0003 | 36                                            | 2,89            | 30                                            | 4,65            |
| gyrB  | SMD_0004 | 186                                           | 2,60            | 237                                           | 2,66            |
| -     | SMD_0005 | 111                                           | 2,77            | 102                                           | 3,42            |
| -     | SMD_0006 | 161                                           | 3,00            | 112                                           | 4,34            |
| -     | SMD_0007 | 432                                           | 2,96            | 399                                           | 3,21            |
| -     | SMD_0008 | 1009                                          | 2,75            | 1261                                          | 2,73            |
| exbB  | SMD_0009 | 3475                                          | 2,10            | 6605                                          | 2,19            |
| exbD  | SMD_0010 | 2167                                          | 2,18            | 3857                                          | 2,20            |
| exbD3 | SMD_0011 | 4074                                          | 2,10            | 7317                                          | 2,02            |
| -     | SMD_0015 | 26                                            | 6,39            | 33                                            | 8,01            |
| -     | SMD_0016 | 281                                           | 3,05            | 272                                           | 3,28            |
| aspC  | SMD_0018 | 138                                           | 2,92            | 157                                           | 3,16            |
| -     | SMD_0025 | 262                                           | 3,27            | 547                                           | 2,51            |
| -     | SMD_0028 | 38                                            | 3,35            | 31                                            | 4,87            |
| phhA  | SMD_0029 | 119                                           | 3,32            | 103                                           | 4,69            |
| -     | SMD_0030 | 70                                            | 3,83            | 52                                            | 5,07            |
| -     | SMD_0031 | 41                                            | 5,03            | 43                                            | 5,29            |
| -     | SMD_0033 | 122                                           | 3,07            | 165                                           | 2,79            |
| -     | SMD_0034 | 127                                           | 2,72            | 303                                           | 2,66            |
| fpg   | SMD_0041 | 32                                            | 3,85            | 48                                            | 3,11            |
| mdoD  | SMD_0042 | 105                                           | 3,06            | 95                                            | 3,75            |
| tdk   | SMD_0043 | 47                                            | 3,93            | 43                                            | 4,60            |
| -     | SMD_0044 | 40                                            | 3,24            | 23                                            | 5,22            |
| -     | SMD_0045 | 24                                            | 4,40            | 18                                            | 5,47            |
| rep   | SMD_0046 | 72                                            | 2,62            | 62                                            | 3,30            |
| -     | SMD_0047 | 33                                            | 3,43            | 36                                            | 4,01            |
| -     | SMD_0050 | 36                                            | 3,92            | 23                                            | 5,62            |

|        |          |     |      |     |      |
|--------|----------|-----|------|-----|------|
| -      | SMD_0051 | 54  | 3,79 | 38  | 3,92 |
| mviM   | SMD_0052 | 52  | 3,83 | 53  | 4,57 |
| hel    | SMD_0053 | 315 | 2,64 | 417 | 2,90 |
| pyrF   | SMD_0054 | 99  | 3,32 | 136 | 2,86 |
| plsB   | SMD_0057 | 120 | 3,06 | 94  | 4,14 |
| -      | SMD_0058 | 72  | 2,53 | 29  | 3,79 |
| rdgC   | SMD_0059 | 142 | 2,77 | 194 | 3,10 |
| -      | SMD_0060 | 113 | 2,14 | 73  | 3,70 |
| -      | SMD_0061 | 46  | 3,38 | 43  | 4,01 |
| gltB   | SMD_0064 | 50  | 3,18 | 51  | 3,01 |
| lhr    | SMD_0075 | 22  | 5,55 | 21  | 7,40 |
| -      | SMD_0076 | 47  | 2,50 | 70  | 3,76 |
| -      | SMD_0077 | 104 | 2,72 | 119 | 3,10 |
| -      | SMD_0078 | 54  | 3,00 | 64  | 3,15 |
| -      | SMD_0079 | 29  | 2,80 | 31  | 3,34 |
| -      | SMD_0082 | 90  | 2,54 | 67  | 2,39 |
| -      | SMD_0083 | 74  | 2,38 | 93  | 2,45 |
| -      | SMD_0084 | 162 | 2,41 | 195 | 2,76 |
| -      | SMD_0085 | 216 | 2,38 | 204 | 2,59 |
| -      | SMD_0086 | 105 | 2,27 | 81  | 2,64 |
| -      | SMD_0088 | 124 | 2,82 | 143 | 2,89 |
| -      | SMD_0089 | 44  | 3,86 | 25  | 6,01 |
| -      | SMD_0090 | 21  | 3,75 | 24  | 3,32 |
| -      | SMD_0091 | 32  | 3,57 | 26  | 4,55 |
| -      | SMD_0093 | 23  | 3,94 | 29  | 4,23 |
| -      | SMD_0094 | 51  | 3,52 | 42  | 3,80 |
| -      | SMD_0095 | 266 | 1,90 | 273 | 2,42 |
| plsC   | SMD_0096 | 95  | 4,11 | 85  | 3,81 |
| -      | SMD_0097 | 48  | 3,53 | 45  | 3,78 |
| -      | SMD_0099 | 91  | 4,11 | 148 | 3,41 |
| ssuE2  | SMD_0100 | 230 | 2,47 | 71  | 3,52 |
| -      | SMD_0101 | 388 | 2,84 | 662 | 2,37 |
| glnA   | SMD_0103 | 48  | 3,71 | 64  | 3,97 |
| ampDII | SMD_0107 | 57  | 3,61 | 49  | 3,36 |
| mltA   | SMD_0108 | 33  | 4,01 | 19  | 5,58 |

|       |          |     |       |      |      |
|-------|----------|-----|-------|------|------|
| sodC  | SMD_0114 | 98  | 2,79  | 134  | 2,82 |
| sodC2 | SMD_0115 | 232 | 2,64  | 279  | 2,63 |
| -     | SMD_0117 | 45  | 3,62  | 48   | 4,01 |
| -     | SMD_0118 | 27  | 4,30  | 27   | 3,61 |
| -     | SMD_0119 | 44  | 2,90  | 33   | 3,72 |
| -     | SMD_0120 | 40  | 3,11  | 34   | 4,70 |
| -     | SMD_0122 | 32  | 5,11  | 64   | 4,81 |
| -     | SMD_0123 | 171 | 3,29  | 128  | 4,10 |
| -     | SMD_0124 | 482 | 2,45  | 420  | 2,95 |
| secB  | SMD_0125 | 554 | 2,46  | 1042 | 2,22 |
| gpsA  | SMD_0126 | 394 | 2,41  | 540  | 2,40 |
| -     | SMD_0128 | 25  | 4,28  | 22   | 4,76 |
| -     | SMD_0129 | 107 | 2,53  | 56   | 4,77 |
| arsR  | SMD_0133 | 34  | 3,15  | 20   | 5,77 |
| -     | SMD_0136 | 135 | 2,77  | 109  | 3,98 |
| -     | SMD_0137 | 387 | 11,29 | 771  | 8,40 |
| -     | SMD_0139 | 91  | 3,15  | 73   | 2,96 |
| nreB  | SMD_0144 | 30  | 3,15  | 30   | 3,88 |
| -     | SMD_0152 | 74  | 2,77  | 55   | 3,55 |
| -     | SMD_0153 | 450 | 5,58  | 659  | 5,27 |
| -     | SMD_0156 | 76  | 3,09  | 48   | 4,13 |
| -     | SMD_0161 | 25  | 8,12  | 48   | 4,80 |
| -     | SMD_0163 | 29  | 3,21  | 24   | 6,25 |
| -     | SMD_0166 | 17  | 3,99  | 22   | 4,97 |
| -     | SMD_0167 | 29  | 3,54  | 31   | 3,40 |
| -     | SMD_0169 | 65  | 2,64  | 62   | 3,40 |
| GCDH  | SMD_0170 | 47  | 2,98  | 24   | 4,12 |
| -     | SMD_0173 | 74  | 2,95  | 92   | 2,74 |
| -     | SMD_0174 | 148 | 4,67  | 191  | 4,60 |
| fabH  | SMD_0175 | 93  | 3,31  | 124  | 3,64 |
| dhaA  | SMD_0176 | 124 | 3,06  | 121  | 3,57 |
| -     | SMD_0177 | 154 | 2,55  | 156  | 3,23 |
| -     | SMD_0178 | 69  | 3,68  | 89   | 2,98 |
| -     | SMD_0181 | 55  | 2,23  | 55   | 3,00 |
| ubiB  | SMD_0182 | 72  | 2,70  | 80   | 3,58 |

|       |          |     |      |     |      |
|-------|----------|-----|------|-----|------|
| yaiO  | SMD_0183 | 182 | 2,62 | 168 | 3,04 |
| truC  | SMD_0188 | 75  | 3,99 | 61  | 3,75 |
| -     | SMD_0189 | 115 | 3,22 | 45  | 4,04 |
| -     | SMD_0191 | 93  | 3,80 | 131 | 3,27 |
| dcp   | SMD_0192 | 165 | 3,06 | 324 | 3,12 |
| lepB2 | SMD_0195 | 20  | 4,59 | 21  | 3,71 |
| -     | SMD_0202 | 64  | 3,08 | 68  | 3,16 |
| -     | SMD_0204 | 339 | 2,03 | 217 | 2,51 |
| -     | SMD_0205 | 322 | 2,17 | 285 | 2,34 |
| -     | SMD_0206 | 281 | 2,19 | 248 | 2,05 |
| ivd   | SMD_0207 | 224 | 2,27 | 228 | 2,95 |
| -     | SMD_0208 | 25  | 2,41 | 32  | 2,59 |
| -     | SMD_0210 | 17  | 2,53 | 28  | 3,42 |
| -     | SMD_0211 | 33  | 2,82 | 32  | 3,51 |
| -     | SMD_0213 | 96  | 2,59 | 55  | 3,54 |
| -     | SMD_0214 | 102 | 2,67 | 76  | 2,68 |
| RRM1  | SMD_0215 | 186 | 2,87 | 235 | 3,09 |
| RRM2  | SMD_0216 | 475 | 2,17 | 643 | 2,50 |
| -     | SMD_0218 | 109 | 2,14 | 88  | 2,82 |
| -     | SMD_0220 | 87  | 3,50 | 98  | 3,59 |
| -     | SMD_0221 | 120 | 3,34 | 100 | 3,95 |
| purU  | SMD_0222 | 65  | 3,19 | 51  | 4,03 |
| pncA  | SMD_0223 | 125 | 3,01 | 100 | 3,58 |
| -     | SMD_0225 | 41  | 4,54 | 30  | 5,55 |
| -     | SMD_0226 | 96  | 4,68 | 63  | 5,89 |
| -     | SMD_0227 | 19  | 7,05 | 22  | 7,73 |
| -     | SMD_0230 | 56  | 2,58 | 87  | 2,56 |
| -     | SMD_0232 | 90  | 2,56 | 168 | 2,11 |
| mmsB  | SMD_0233 | 45  | 2,94 | 107 | 2,77 |
| ohr   | SMD_0234 | 43  | 3,88 | 135 | 3,14 |
| -     | SMD_0236 | 18  | 7,12 | 46  | 4,20 |
| -     | SMD_0238 | 21  | 1,65 | 43  | 3,37 |
| -     | SMD_0239 | 32  | 3,41 | 82  | 4,82 |
| -     | SMD_0242 | 35  | 3,31 | 69  | 3,72 |
| -     | SMD_0244 | 30  | 2,94 | 51  | 3,53 |

|      |          |     |      |      |      |
|------|----------|-----|------|------|------|
| -    | SMD_0245 | 30  | 3,45 | 52   | 3,16 |
| -    | SMD_0248 | 26  | 2,83 | 59   | 2,73 |
| -    | SMD_0251 | 20  | 2,61 | 65   | 2,77 |
| -    | SMD_0252 | 16  | 3,40 | 39   | 3,14 |
| -    | SMD_0254 | 16  | 3,93 | 52   | 2,36 |
| -    | SMD_0255 | 16  | 2,81 | 17   | 3,02 |
| -    | SMD_0256 | 36  | 3,73 | 51   | 3,87 |
| -    | SMD_0257 | 118 | 3,47 | 92   | 4,21 |
| -    | SMD_0258 | 91  | 2,82 | 97   | 3,32 |
| dusA | SMD_0259 | 65  | 3,16 | 49   | 4,52 |
| -    | SMD_0260 | 243 | 2,90 | 176  | 4,44 |
| -    | SMD_0261 | 150 | 3,69 | 127  | 4,95 |
| phoQ | SMD_0262 | 112 | 3,61 | 132  | 3,72 |
| -    | SMD_0263 | 83  | 4,02 | 61   | 5,56 |
| -    | SMD_0264 | 37  | 2,72 | 28   | 6,02 |
| birA | SMD_0265 | 61  | 4,21 | 61   | 3,87 |
| -    | SMD_0267 | 17  | 3,49 | 17   | 4,73 |
| -    | SMD_0269 | 54  | 3,61 | 70   | 3,22 |
| arcA | SMD_0276 | 114 | 2,59 | 103  | 2,43 |
| ecnA | SMD_0277 | 389 | 2,75 | 800  | 2,73 |
| trpS | SMD_0280 | 140 | 3,12 | 128  | 3,32 |
| -    | SMD_0281 | 62  | 3,88 | 77   | 2,91 |
| -    | SMD_0282 | 42  | 3,00 | 48   | 3,62 |
| -    | SMD_0283 | 96  | 3,06 | 59   | 2,99 |
| -    | SMD_0284 | 109 | 1,99 | 65   | 3,91 |
| -    | SMD_0285 | 45  | 2,94 | 46   | 3,35 |
| -    | SMD_0286 | 40  | 4,93 | 28   | 5,43 |
| rarD | SMD_0287 | 99  | 3,41 | 79   | 3,13 |
| -    | SMD_0288 | 592 | 3,15 | 1629 | 2,64 |
| -    | SMD_0294 | 28  | 2,35 | 21   | 3,82 |
| katA | SMD_0296 | 35  | 3,48 | 18   | 4,83 |
| -    | SMD_0297 | 172 | 3,26 | 170  | 2,88 |
| -    | SMD_0298 | 44  | 3,06 | 46   | 3,82 |
| -    | SMD_0299 | 65  | 3,69 | 48   | 4,28 |
| -    | SMD_0301 | 212 | 2,67 | 212  | 3,05 |



|      |          |      |      |      |      |
|------|----------|------|------|------|------|
| -    | SMD_0302 | 161  | 2,57 | 199  | 3,08 |
| -    | SMD_0303 | 248  | 3,13 | 331  | 4,11 |
| -    | SMD_0304 | 80   | 3,69 | 121  | 3,68 |
| -    | SMD_0305 | 417  | 2,10 | 930  | 1,82 |
| -    | SMD_0306 | 47   | 2,67 | 44   | 2,09 |
| -    | SMD_0309 | 2879 | 2,84 | 5187 | 2,69 |
| -    | SMD_0310 | 194  | 3,53 | 153  | 4,63 |
| -    | SMD_0311 | 232  | 4,76 | 222  | 6,04 |
| -    | SMD_0312 | 41   | 5,16 | 50   | 5,34 |
| -    | SMD_0314 | 78   | 3,19 | 79   | 3,61 |
| -    | SMD_0315 | 93   | 3,69 | 71   | 5,67 |
| -    | SMD_0316 | 56   | 3,12 | 69   | 3,63 |
| -    | SMD_0317 | 199  | 2,82 | 221  | 2,86 |
| argS | SMD_0318 | 162  | 3,27 | 227  | 3,23 |
| dfp  | SMD_0321 | 56   | 3,37 | 42   | 3,41 |
| dut  | SMD_0322 | 65   | 1,41 | 63   | 3,27 |
| algC | SMD_0323 | 127  | 2,59 | 132  | 2,61 |
| kdpE | SMD_0324 | 47   | 3,48 | 17   | 6,01 |
| -    | SMD_0329 | 330  | 2,13 | 329  | 2,78 |
| pyrE | SMD_0330 | 268  | 2,35 | 378  | 2,49 |
| ampN | SMD_0331 | 95   | 2,80 | 77   | 3,30 |
| -    | SMD_0333 | 148  | 3,44 | 192  | 3,68 |
| -    | SMD_0334 | 79   | 2,63 | 50   | 3,76 |
| -    | SMD_0335 | 42   | 3,69 | 44   | 3,53 |
| tyrS | SMD_0336 | 143  | 2,70 | 182  | 3,10 |
| -    | SMD_0348 | 204  | 2,22 | 342  | 2,03 |
| -    | SMD_0349 | 149  | 2,38 | 197  | 1,99 |
| -    | SMD_0350 | 38   | 3,75 | 44   | 3,97 |
| ctpA | SMD_0351 | 71   | 3,33 | 49   | 4,47 |
| fadL | SMD_0353 | 207  | 2,37 | 411  | 2,30 |
| nadR | SMD_0355 | 47   | 2,34 | 52   | 2,39 |
| putA | SMD_0356 | 272  | 2,30 | 461  | 2,34 |
| -    | SMD_0366 | 47   | 3,29 | 46   | 4,89 |
| cyoE | SMD_0367 | 123  | 2,78 | 115  | 3,07 |
| -    | SMD_0370 | 42   | 2,85 | 26   | 3,77 |

|       |          |      |      |      |      |
|-------|----------|------|------|------|------|
| dnaG  | SMD_0371 | 57   | 2,76 | 36   | 3,67 |
| -     | SMD_0372 | 36   | 3,65 | 22   | 4,61 |
| -     | SMD_0373 | 180  | 3,00 | 252  | 3,67 |
| rpsU  | SMD_0374 | 1000 | 3,49 | 1301 | 3,23 |
| gcp   | SMD_0375 | 26   | 5,31 | 27   | 2,66 |
| -     | SMD_0376 | 114  | 3,86 | 77   | 5,79 |
| folB  | SMD_0377 | 84   | 2,57 | 67   | 3,70 |
| -     | SMD_0378 | 82   | 2,91 | 110  | 3,36 |
| bgIX  | SMD_0379 | 74   | 2,56 | 88   | 2,36 |
| -     | SMD_0381 | 74   | 3,40 | 90   | 3,03 |
| -     | SMD_0382 | 100  | 2,67 | 42   | 3,97 |
| -     | SMD_0384 | 26   | 2,99 | 22   | 3,39 |
| -     | SMD_0385 | 21   | 2,93 | 29   | 4,24 |
| -     | SMD_0388 | 25   | 2,59 | 22   | 4,12 |
| -     | SMD_0394 | 35   | 2,50 | 29   | 5,18 |
| -     | SMD_0395 | 109  | 2,59 | 84   | 3,91 |
| -     | SMD_0396 | 42   | 4,13 | 96   | 3,24 |
| -     | SMD_0397 | 78   | 2,91 | 77   | 3,01 |
| -     | SMD_0398 | 102  | 2,43 | 88   | 3,21 |
| glnE  | SMD_0399 | 43   | 2,80 | 21   | 4,63 |
| -     | SMD_0400 | 96   | 3,70 | 102  | 3,59 |
| -     | SMD_0406 | 44   | 4,01 | 64   | 2,88 |
| -     | SMD_0407 | 149  | 2,74 | 319  | 2,85 |
| -     | SMD_0408 | 58   | 3,44 | 54   | 3,14 |
| -     | SMD_0409 | 39   | 4,34 | 18   | 5,33 |
| -     | SMD_0410 | 38   | 3,62 | 38   | 3,91 |
| aceE2 | SMD_0412 | 790  | 2,30 | 1121 | 2,40 |
| -     | SMD_0413 | 25   | 1,73 | 20   | 1,90 |
| -     | SMD_0417 | 32   | 2,50 | 31   | 3,16 |
| -     | SMD_0418 | 39   | 1,56 | 28   | 3,17 |
| -     | SMD_0419 | 102  | 1,37 | 43   | 1,57 |
| -     | SMD_0420 | 72   | 2,22 | 55   | 3,39 |
| -     | SMD_0428 | 36   | 3,85 | 30   | 2,74 |
| -     | SMD_0431 | 41   | 3,61 | 18   | 4,67 |
| -     | SMD_0445 | 36   | 3,50 | 47   | 3,86 |

|      |          |     |      |      |      |
|------|----------|-----|------|------|------|
| -    | SMD_0446 | 19  | 5,94 | 27   | 4,65 |
| -    | SMD_0447 | 37  | 3,18 | 25   | 3,88 |
| -    | SMD_0448 | 53  | 1,46 | 43   | 2,66 |
| -    | SMD_0454 | 62  | 4,41 | 63   | 5,10 |
| -    | SMD_0455 | 228 | 2,81 | 379  | 2,30 |
| -    | SMD_0456 | 579 | 2,03 | 899  | 2,25 |
| -    | SMD_0457 | 625 | 2,33 | 719  | 2,30 |
| -    | SMD_0458 | 73  | 2,24 | 133  | 2,66 |
| -    | SMD_0459 | 33  | 2,58 | 34   | 2,82 |
| -    | SMD_0462 | 18  | 3,05 | 16   | 4,62 |
| -    | SMD_0463 | 34  | 2,72 | 27   | 4,22 |
| -    | SMD_0464 | 31  | 3,00 | 29   | 2,10 |
| -    | SMD_0467 | 75  | 2,68 | 148  | 2,65 |
| -    | SMD_0469 | 25  | 1,69 | 18   | 5,06 |
| -    | SMD_0472 | 73  | 3,36 | 65   | 4,16 |
| -    | SMD_0474 | 213 | 3,15 | 193  | 3,74 |
| -    | SMD_0475 | 176 | 2,72 | 207  | 2,55 |
| -    | SMD_0476 | 561 | 2,46 | 1081 | 2,13 |
| motB | SMD_0477 | 20  | 3,23 | 21   | 3,36 |
| motA | SMD_0478 | 37  | 3,33 | 28   | 4,15 |
| msrB | SMD_0479 | 47  | 3,43 | 53   | 3,03 |
| -    | SMD_0480 | 22  | 4,30 | 17   | 4,11 |
| dadA | SMD_0483 | 59  | 3,52 | 57   | 3,87 |
| -    | SMD_0484 | 166 | 2,96 | 142  | 2,99 |
| -    | SMD_0485 | 228 | 2,42 | 169  | 2,95 |
| rsmC | SMD_0489 | 37  | 3,86 | 51   | 3,92 |
| rsuA | SMD_0490 | 200 | 2,79 | 212  | 2,98 |
| -    | SMD_0491 | 337 | 2,38 | 352  | 2,20 |
| fabB | SMD_0492 | 265 | 2,33 | 434  | 2,32 |
| fabA | SMD_0493 | 251 | 2,19 | 438  | 2,23 |
| -    | SMD_0498 | 62  | 3,24 | 87   | 4,19 |
| gph  | SMD_0499 | 122 | 3,64 | 92   | 3,71 |
| -    | SMD_0500 | 174 | 3,03 | 247  | 3,05 |
| -    | SMD_0501 | 110 | 2,86 | 68   | 3,67 |
| -    | SMD_0503 | 97  | 4,04 | 87   | 4,17 |

|       |          |      |       |      |       |
|-------|----------|------|-------|------|-------|
| -     | SMD_0508 | 32   | 2,53  | 29   | 2,55  |
| -     | SMD_0510 | 50   | 2,99  | 42   | 3,56  |
| rstA  | SMD_0511 | 138  | 2,91  | 53   | 4,23  |
| -     | SMD_0512 | 162  | 2,29  | 76   | 2,77  |
| -     | SMD_0513 | 135  | 3,43  | 80   | 2,79  |
| ptpS  | SMD_0514 | 110  | 2,28  | 58   | 4,33  |
| -     | SMD_0516 | 20   | 4,66  | 20   | 5,91  |
| rhIE  | SMD_0517 | 97   | 5,70  | 74   | 6,09  |
| -     | SMD_0519 | 123  | 2,29  | 140  | 3,09  |
| -     | SMD_0520 | 157  | 2,91  | 148  | 3,46  |
| -     | SMD_0521 | 77   | 2,85  | 30   | 5,49  |
| -     | SMD_0522 | 20   | 6,61  | 18   | 9,31  |
| -     | SMD_0524 | 69   | 2,73  | 89   | 3,25  |
| -     | SMD_0525 | 86   | 3,47  | 124  | 2,73  |
| -     | SMD_0526 | 75   | 11,67 | 96   | 11,74 |
| cbsB  | SMD_0527 | 243  | 2,67  | 341  | 2,57  |
| metC  | SMD_0528 | 278  | 2,64  | 396  | 2,47  |
| wzm   | SMD_0529 | 289  | 2,06  | 364  | 2,34  |
| wzt   | SMD_0530 | 763  | 2,20  | 1003 | 2,32  |
| -     | SMD_0531 | 689  | 2,25  | 936  | 2,45  |
| wxocA | SMD_0532 | 838  | 2,09  | 966  | 2,23  |
| -     | SMD_0533 | 1054 | 1,96  | 1415 | 1,84  |
| -     | SMD_0534 | 458  | 2,05  | 449  | 2,25  |
| -     | SMD_0535 | 514  | 1,75  | 688  | 1,89  |
| -     | SMD_0537 | 18   | 3,91  | 31   | 4,74  |
| -     | SMD_0540 | 47   | 2,57  | 45   | 3,47  |
| -     | SMD_0541 | 240  | 2,05  | 217  | 2,62  |
| etfA  | SMD_0542 | 171  | 2,56  | 314  | 3,11  |
| etfB  | SMD_0543 | 217  | 2,59  | 399  | 2,29  |
| rfbB  | SMD_0544 | 488  | 2,35  | 613  | 2,32  |
| rmlA  | SMD_0545 | 573  | 2,19  | 646  | 2,32  |
| rmlC  | SMD_0546 | 996  | 1,97  | 1119 | 2,23  |
| rfbD  | SMD_0547 | 558  | 2,05  | 638  | 2,31  |
| manA  | SMD_0548 | 473  | 2,12  | 523  | 2,30  |
| spgM  | SMD_0549 | 160  | 2,47  | 313  | 2,51  |

|      |          |      |      |      |       |
|------|----------|------|------|------|-------|
| lpsI | SMD_0550 | 164  | 2,74 | 190  | 3,22  |
| lpsJ | SMD_0551 | 214  | 2,20 | 335  | 2,52  |
| -    | SMD_0552 | 226  | 2,60 | 302  | 2,05  |
| -    | SMD_0554 | 59   | 2,65 | 46   | 3,56  |
| -    | SMD_0556 | 44   | 3,11 | 28   | 4,60  |
| hns  | SMD_0558 | 123  | 2,82 | 320  | 2,93  |
| proS | SMD_0559 | 174  | 3,00 | 210  | 3,15  |
| -    | SMD_0560 | 399  | 5,83 | 435  | 11,90 |
| -    | SMD_0561 | 141  | 2,87 | 117  | 3,28  |
| pssA | SMD_0562 | 54   | 4,56 | 53   | 3,03  |
| -    | SMD_0563 | 27   | 3,76 | 38   | 4,04  |
| -    | SMD_0565 | 68   | 2,76 | 67   | 3,34  |
| valS | SMD_0566 | 258  | 2,33 | 389  | 2,49  |
| pepA | SMD_0569 | 302  | 2,92 | 452  | 2,72  |
| -    | SMD_0570 | 44   | 4,10 | 57   | 3,70  |
| -    | SMD_0571 | 84   | 3,30 | 79   | 3,15  |
| -    | SMD_0572 | 115  | 2,73 | 52   | 3,61  |
| dsbC | SMD_0574 | 32   | 3,38 | 38   | 4,16  |
| purL | SMD_0576 | 144  | 2,55 | 171  | 2,59  |
| xpsF | SMD_0581 | 73   | 2,45 | 48   | 3,06  |
| xpsG | SMD_0582 | 69   | 1,54 | 62   | 3,32  |
| xpsH | SMD_0583 | 49   | 2,71 | 58   | 2,89  |
| xpsJ | SMD_0585 | 44   | 2,27 | 31   | 3,61  |
| pefK | SMD_0586 | 88   | 2,71 | 71   | 2,74  |
| pefL | SMD_0587 | 95   | 2,51 | 104  | 2,62  |
| xpsN | SMD_0589 | 56   | 2,44 | 46   | 2,81  |
| xpsD | SMD_0590 | 75   | 2,26 | 83   | 2,84  |
| -    | SMD_0592 | 58   | 3,19 | 52   | 3,08  |
| pncB | SMD_0593 | 56   | 3,59 | 48   | 3,84  |
| fimA | SMD_0595 | 2106 | 2,45 | 3844 | 2,27  |
| -    | SMD_0596 | 442  | 3,39 | 362  | 3,77  |
| mrkC | SMD_0597 | 464  | 2,55 | 404  | 2,96  |
| -    | SMD_0598 | 613  | 2,11 | 530  | 2,45  |
| wecB | SMD_0599 | 62   | 3,01 | 50   | 3,12  |
| -    | SMD_0605 | 194  | 2,99 | 247  | 3,07  |

|      |          |     |      |      |      |
|------|----------|-----|------|------|------|
| -    | SMD_0606 | 128 | 4,46 | 213  | 5,14 |
| glyA | SMD_0607 | 161 | 3,32 | 185  | 3,13 |
| -    | SMD_0608 | 122 | 2,77 | 105  | 2,45 |
| -    | SMD_0609 | 82  | 2,72 | 54   | 3,08 |
| nrdR | SMD_0610 | 36  | 3,73 | 29   | 3,58 |
| ribD | SMD_0611 | 87  | 3,08 | 48   | 4,61 |
| -    | SMD_0612 | 117 | 3,05 | 131  | 3,10 |
| -    | SMD_0613 | 138 | 2,96 | 182  | 3,21 |
| -    | SMD_0614 | 113 | 4,02 | 98   | 4,37 |
| ribE | SMD_0615 | 18  | 3,56 | 20   | 4,17 |
| ribB | SMD_0616 | 24  | 3,20 | 50   | 3,49 |
| ribH | SMD_0617 | 198 | 3,30 | 209  | 3,04 |
| thiL | SMD_0619 | 42  | 3,48 | 74   | 2,10 |
| -    | SMD_0629 | 30  | 2,73 | 21   | 4,04 |
| -    | SMD_0633 | 45  | 5,60 | 20   | 8,75 |
| -    | SMD_0634 | 28  | 6,31 | 38   | 6,06 |
| mraZ | SMD_0635 | 232 | 3,40 | 147  | 4,03 |
| mraW | SMD_0636 | 149 | 3,05 | 102  | 3,34 |
| ftsI | SMD_0638 | 191 | 2,81 | 157  | 2,93 |
| murE | SMD_0639 | 242 | 2,33 | 269  | 2,40 |
| murF | SMD_0640 | 372 | 2,18 | 368  | 2,27 |
| mraY | SMD_0641 | 305 | 1,90 | 405  | 2,11 |
| ftsW | SMD_0642 | 369 | 2,04 | 452  | 2,31 |
| murG | SMD_0643 | 244 | 2,09 | 300  | 2,30 |
| murC | SMD_0644 | 540 | 2,05 | 827  | 2,01 |
| ddlB | SMD_0645 | 774 | 2,00 | 1124 | 2,00 |
| ftsQ | SMD_0646 | 628 | 1,89 | 930  | 2,01 |
| ftsA | SMD_0647 | 794 | 1,93 | 1116 | 1,82 |
| ftsZ | SMD_0648 | 888 | 3,28 | 1631 | 2,92 |
| lpxC | SMD_0649 | 369 | 2,18 | 388  | 2,14 |
| -    | SMD_0650 | 98  | 3,42 | 125  | 2,81 |
| secA | SMD_0651 | 234 | 2,60 | 217  | 2,78 |
| -    | SMD_0653 | 49  | 2,87 | 56   | 3,78 |
| metF | SMD_0654 | 16  | 3,71 | 28   | 4,36 |
| -    | SMD_0658 | 79  | 2,96 | 89   | 2,99 |

|       |          |     |      |      |      |
|-------|----------|-----|------|------|------|
| -     | SMD_0660 | 30  | 3,42 | 33   | 3,20 |
| -     | SMD_0662 | 34  | 3,30 | 29   | 3,05 |
| sahH  | SMD_0664 | 860 | 2,37 | 1775 | 2,22 |
| -     | SMD_0665 | 93  | 2,19 | 131  | 2,15 |
| ppc   | SMD_0666 | 65  | 2,96 | 47   | 3,20 |
| -     | SMD_0667 | 138 | 3,29 | 100  | 3,31 |
| metK  | SMD_0668 | 299 | 2,61 | 662  | 2,22 |
| -     | SMD_0671 | 62  | 2,29 | 44   | 3,95 |
| -     | SMD_0672 | 38  | 2,71 | 22   | 4,23 |
| rbsK  | SMD_0675 | 195 | 2,59 | 281  | 2,56 |
| -     | SMD_0676 | 90  | 2,62 | 93   | 3,75 |
| -     | SMD_0677 | 26  | 2,91 | 38   | 2,98 |
| -     | SMD_0681 | 109 | 1,95 | 92   | 1,97 |
| tesA  | SMD_0683 | 42  | 3,67 | 42   | 4,05 |
| -     | SMD_0684 | 244 | 2,76 | 223  | 3,31 |
| -     | SMD_0685 | 61  | 3,52 | 51   | 3,57 |
| dgkA  | SMD_0687 | 52  | 2,90 | 72   | 2,90 |
| -     | SMD_0692 | 32  | 3,28 | 20   | 1,84 |
| lgt   | SMD_0693 | 92  | 2,78 | 66   | 3,85 |
| thyA  | SMD_0694 | 107 | 2,72 | 120  | 2,88 |
| -     | SMD_0696 | 141 | 2,21 | 83   | 3,84 |
| apaH  | SMD_0697 | 295 | 2,74 | 299  | 2,44 |
| -     | SMD_0698 | 309 | 2,00 | 224  | 2,48 |
| ksgA  | SMD_0699 | 93  | 2,65 | 127  | 2,41 |
| surA  | SMD_0701 | 514 | 2,59 | 602  | 2,72 |
| ostA  | SMD_0702 | 229 | 2,24 | 219  | 2,75 |
| -     | SMD_0705 | 64  | 3,43 | 70   | 4,29 |
| ubiH  | SMD_0706 | 76  | 3,17 | 60   | 2,82 |
| ubiF  | SMD_0707 | 134 | 2,83 | 108  | 3,28 |
| -     | SMD_0709 | 113 | 2,08 | 164  | 2,80 |
| -     | SMD_0710 | 99  | 2,57 | 167  | 2,77 |
| -     | SMD_0711 | 81  | 2,83 | 103  | 2,50 |
| glnS  | SMD_0713 | 120 | 3,04 | 167  | 3,17 |
| -     | SMD_0714 | 35  | 3,08 | 46   | 4,70 |
| msrA2 | SMD_0715 | 47  | 2,59 | 62   | 3,38 |

|        |          |      |      |      |      |
|--------|----------|------|------|------|------|
| talB   | SMD_0716 | 263  | 2,49 | 505  | 2,46 |
| rnk    | SMD_0717 | 185  | 2,53 | 273  | 2,61 |
| oxyR   | SMD_0718 | 58   | 3,56 | 66   | 3,52 |
| ahpF   | SMD_0719 | 68   | 3,58 | 68   | 3,86 |
| ahpC   | SMD_0720 | 929  | 4,72 | 1522 | 5,18 |
| hemK   | SMD_0721 | 18   | 3,52 | 34   | 4,25 |
| -      | SMD_0726 | 56   | 3,16 | 40   | 3,13 |
| -      | SMD_0727 | 122  | 2,46 | 120  | 2,90 |
| nudF   | SMD_0728 | 110  | 2,71 | 125  | 2,86 |
| exo    | SMD_0729 | 49   | 2,61 | 46   | 3,83 |
| -      | SMD_0730 | 21   | 3,50 | 40   | 4,70 |
| -      | SMD_0731 | 69   | 2,89 | 53   | 3,46 |
| -      | SMD_0733 | 28   | 3,98 | 31   | 4,76 |
| -      | SMD_0734 | 22   | 3,54 | 23   | 4,60 |
| -      | SMD_0739 | 129  | 3,59 | 73   | 4,80 |
| ilvE   | SMD_0740 | 191  | 2,75 | 241  | 2,81 |
| StmPr1 | SMD_0741 | 114  | 3,19 | 120  | 3,29 |
| -      | SMD_0742 | 164  | 3,38 | 201  | 3,33 |
| -      | SMD_0745 | 46   | 2,76 | 28   | 4,01 |
| -      | SMD_0746 | 145  | 2,81 | 221  | 2,85 |
| -      | SMD_0747 | 61   | 2,93 | 48   | 3,87 |
| prfA   | SMD_0749 | 96   | 2,47 | 86   | 3,14 |
| -      | SMD_0751 | 67   | 2,64 | 51   | 3,61 |
| -      | SMD_0752 | 140  | 2,67 | 209  | 2,43 |
| ipk    | SMD_0753 | 172  | 2,43 | 172  | 2,84 |
| prs    | SMD_0755 | 92   | 3,48 | 67   | 3,70 |
| rplY   | SMD_0756 | 1913 | 2,72 | 3220 | 2,83 |
| pth    | SMD_0757 | 651  | 2,28 | 500  | 2,52 |
| ychF   | SMD_0758 | 561  | 2,40 | 961  | 2,33 |
| -      | SMD_0759 | 18   | 3,86 | 27   | 3,53 |
| -      | SMD_0764 | 28   | 3,37 | 27   | 4,46 |
| -      | SMD_0766 | 55   | 3,11 | 62   | 3,38 |
| tuf    | SMD_0770 | 1951 | 2,56 | 3723 | 2,46 |
| -      | SMD_0772 | 1049 | 2,65 | 630  | 3,41 |
| nusG   | SMD_0773 | 630  | 2,67 | 421  | 3,92 |



|      |          |      |      |       |      |
|------|----------|------|------|-------|------|
| rplK | SMD_0774 | 6335 | 2,31 | 9792  | 2,40 |
| rplA | SMD_0775 | 3986 | 2,32 | 7552  | 2,35 |
| rplJ | SMD_0776 | 5485 | 3,25 | 10351 | 2,98 |
| rplL | SMD_0777 | 4959 | 3,03 | 8896  | 2,93 |
| rpoB | SMD_0778 | 1626 | 2,35 | 3016  | 2,33 |
| rpoC | SMD_0779 | 1386 | 2,11 | 2672  | 2,11 |
| rpsL | SMD_0780 | 924  | 2,14 | 1681  | 2,13 |
| rpsG | SMD_0781 | 3084 | 2,04 | 5774  | 2,16 |
| fusA | SMD_0782 | 2995 | 2,20 | 5438  | 2,11 |
| tuf2 | SMD_0783 | 3393 | 2,18 | 8966  | 2,04 |
| rpsJ | SMD_0784 | 5023 | 3,56 | 11156 | 2,88 |
| rplC | SMD_0785 | 7618 | 3,53 | 14448 | 2,98 |
| rplD | SMD_0786 | 9670 | 3,34 | 17878 | 2,88 |
| rplW | SMD_0787 | 6214 | 3,57 | 13221 | 2,89 |
| rplB | SMD_0788 | 6089 | 3,55 | 13677 | 2,85 |
| rpsS | SMD_0789 | 3555 | 3,70 | 7768  | 2,89 |
| rplV | SMD_0790 | 4270 | 3,58 | 8238  | 2,94 |
| rpsC | SMD_0791 | 5553 | 3,55 | 10846 | 2,95 |
| rplP | SMD_0792 | 7295 | 3,51 | 15078 | 2,86 |
| rpmC | SMD_0793 | 7953 | 3,41 | 17482 | 2,81 |
| rpsQ | SMD_0794 | 2944 | 3,43 | 5621  | 2,84 |
| rplN | SMD_0795 | 5560 | 3,34 | 11827 | 2,87 |
| rplX | SMD_0796 | 4741 | 3,43 | 8982  | 2,90 |
| rplE | SMD_0797 | 7128 | 3,48 | 14344 | 2,86 |
| rpsN | SMD_0798 | 2022 | 3,85 | 4662  | 2,99 |
| rpsH | SMD_0799 | 3126 | 2,58 | 3918  | 2,49 |
| rplF | SMD_0800 | 5294 | 2,49 | 7208  | 2,44 |
| rplR | SMD_0801 | 898  | 2,77 | 1525  | 2,23 |
| rpsE | SMD_0802 | 3556 | 2,19 | 5586  | 2,13 |
| rpmD | SMD_0803 | 7366 | 2,10 | 13787 | 2,08 |
| rplO | SMD_0804 | 5802 | 2,06 | 9956  | 2,11 |
| secY | SMD_0805 | 872  | 2,26 | 1073  | 2,36 |
| rpsM | SMD_0806 | 2591 | 2,08 | 5240  | 2,05 |
| rpsK | SMD_0807 | 4871 | 2,16 | 10334 | 2,02 |
| rpsD | SMD_0808 | 4241 | 2,15 | 7180  | 2,06 |

|       |          |       |      |       |      |
|-------|----------|-------|------|-------|------|
| rpoA  | SMD_0809 | 1923  | 2,32 | 3177  | 2,29 |
| rplQ  | SMD_0810 | 2811  | 2,09 | 4174  | 2,05 |
| dsbB  | SMD_0811 | 77    | 3,45 | 104   | 2,65 |
| -     | SMD_0812 | 111   | 3,12 | 96    | 3,48 |
| aroH  | SMD_0813 | 54    | 3,43 | 57    | 3,68 |
| -     | SMD_0814 | 28    | 3,91 | 24    | 3,83 |
| -     | SMD_0815 | 45    | 3,30 | 50    | 3,91 |
| typA  | SMD_0817 | 526   | 2,57 | 696   | 2,50 |
| ppiB  | SMD_0818 | 651   | 2,54 | 1599  | 2,53 |
| mdh   | SMD_0819 | 969   | 2,41 | 1879  | 2,42 |
| rluA  | SMD_0820 | 41    | 3,18 | 33    | 3,21 |
| prpE  | SMD_0821 | 78    | 2,61 | 101   | 2,89 |
| -     | SMD_0822 | 51    | 4,06 | 39    | 6,13 |
| -     | SMD_0823 | 104   | 3,36 | 92    | 4,01 |
| gst   | SMD_0824 | 112   | 2,96 | 155   | 3,23 |
| -     | SMD_0825 | 91    | 4,26 | 76    | 4,22 |
| -     | SMD_0828 | 17    | 4,65 | 25    | 4,13 |
| -     | SMD_0829 | 10827 | 3,24 | 29153 | 3,37 |
| -     | SMD_0830 | 20    | 5,37 | 54    | 4,29 |
| rluB2 | SMD_0831 | 75    | 2,93 | 99    | 2,99 |
| -     | SMD_0832 | 450   | 2,06 | 749   | 2,29 |
| kbl   | SMD_0833 | 262   | 2,70 | 323   | 2,98 |
| -     | SMD_0834 | 223   | 3,36 | 265   | 3,72 |
| tdh   | SMD_0835 | 147   | 2,57 | 215   | 2,41 |
| -     | SMD_0836 | 135   | 2,26 | 191   | 2,43 |
| -     | SMD_0837 | 120   | 2,79 | 105   | 2,70 |
| folC  | SMD_0838 | 74    | 2,80 | 83    | 2,97 |
| -     | SMD_0840 | 170   | 2,78 | 153   | 3,36 |
| purF  | SMD_0841 | 151   | 2,77 | 174   | 2,90 |
| -     | SMD_0842 | 76    | 2,55 | 68    | 2,56 |
| -     | SMD_0843 | 47    | 3,04 | 29    | 3,74 |
| -     | SMD_0844 | 139   | 2,88 | 117   | 3,44 |
| lpxH  | SMD_0845 | 44    | 3,81 | 52    | 4,15 |
| -     | SMD_0848 | 59    | 3,05 | 39    | 3,88 |
| ppx   | SMD_0849 | 71    | 4,15 | 54    | 5,24 |

|      |          |      |      |      |      |
|------|----------|------|------|------|------|
| ppk  | SMD_0850 | 44   | 3,03 | 37   | 3,27 |
| -    | SMD_0853 | 33   | 3,35 | 38   | 3,33 |
| grxC | SMD_0854 | 144  | 2,27 | 179  | 3,06 |
| -    | SMD_0856 | 380  | 2,07 | 838  | 2,38 |
| -    | SMD_0859 | 33   | 3,98 | 27   | 4,20 |
| -    | SMD_0860 | 42   | 3,49 | 25   | 4,15 |
| -    | SMD_0861 | 146  | 3,41 | 320  | 2,65 |
| tig  | SMD_0869 | 404  | 2,85 | 505  | 2,94 |
| clpP | SMD_0870 | 307  | 2,56 | 492  | 2,62 |
| clpX | SMD_0871 | 579  | 2,34 | 589  | 2,78 |
| lon  | SMD_0872 | 296  | 2,06 | 259  | 2,61 |
| hupB | SMD_0873 | 1382 | 2,34 | 1876 | 2,12 |
| ppiD | SMD_0879 | 234  | 2,72 | 298  | 2,80 |
| -    | SMD_0881 | 61   | 3,77 | 59   | 3,68 |
| -    | SMD_0882 | 47   | 3,13 | 27   | 3,57 |
| -    | SMD_0883 | 62   | 3,93 | 77   | 3,45 |
| -    | SMD_0885 | 178  | 2,16 | 146  | 2,37 |
| -    | SMD_0886 | 230  | 2,35 | 167  | 2,85 |
| -    | SMD_0887 | 61   | 2,33 | 36   | 2,65 |
| -    | SMD_0893 | 51   | 1,48 | 36   | 1,64 |
| -    | SMD_0914 | 20   | 2,89 | 29   | 2,70 |
| mltD | SMD_0933 | 89   | 4,61 | 76   | 5,30 |
| gloB | SMD_0934 | 44   | 5,04 | 26   | 6,16 |
| -    | SMD_0935 | 80   | 3,43 | 90   | 3,37 |
| rnhA | SMD_0936 | 143  | 2,94 | 125  | 3,28 |
| -    | SMD_0938 | 153  | 2,33 | 136  | 3,09 |
| -    | SMD_0940 | 165  | 2,94 | 126  | 2,24 |
| -    | SMD_0941 | 153  | 3,05 | 93   | 3,85 |
| -    | SMD_0942 | 45   | 2,86 | 49   | 3,25 |
| -    | SMD_0961 | 81   | 2,31 | 128  | 2,62 |
| -    | SMD_0962 | 20   | 3,41 | 48   | 2,67 |
| dnaX | SMD_0964 | 109  | 2,70 | 79   | 3,08 |
| -    | SMD_0965 | 394  | 2,65 | 1018 | 2,26 |
| -    | SMD_0967 | 17   | 3,76 | 85   | 2,37 |
| -    | SMD_0968 | 105  | 3,50 | 133  | 3,37 |

|       |          |      |      |      |      |
|-------|----------|------|------|------|------|
| -     | SMD_0969 | 32   | 3,25 | 29   | 2,65 |
| -     | SMD_0970 | 25   | 3,12 | 16   | 2,87 |
| -     | SMD_0972 | 39   | 3,61 | 37   | 3,60 |
| -     | SMD_0973 | 97   | 2,56 | 98   | 2,90 |
| -     | SMD_0974 | 414  | 2,70 | 167  | 4,03 |
| rpmF  | SMD_0975 | 1121 | 2,54 | 1905 | 2,64 |
| fabH2 | SMD_0976 | 389  | 2,34 | 317  | 2,78 |
| -     | SMD_0977 | 140  | 3,48 | 123  | 3,22 |
| fabD  | SMD_0978 | 207  | 3,06 | 170  | 3,08 |
| fabG  | SMD_0979 | 375  | 2,72 | 360  | 2,89 |
| acpP  | SMD_0980 | 1570 | 2,16 | 2557 | 2,08 |
| fabF  | SMD_0981 | 441  | 2,25 | 551  | 2,66 |
| yceG  | SMD_0983 | 122  | 2,94 | 86   | 3,09 |
| holB  | SMD_0985 | 108  | 2,29 | 95   | 1,95 |
| pilZ  | SMD_0986 | 105  | 2,83 | 120  | 3,16 |
| -     | SMD_0990 | 121  | 2,61 | 38   | 2,35 |
| -     | SMD_0991 | 47   | 2,79 | 33   | 3,58 |
| -     | SMD_0992 | 77   | 3,74 | 67   | 4,29 |
| -     | SMD_0994 | 26   | 2,58 | 69   | 2,50 |
| qnrR  | SMD_0997 | 20   | 1,64 | 18   | 2,70 |
| -     | SMD_0999 | 33   | 2,23 | 30   | 4,04 |
| -     | SMD_1006 | 52   | 2,78 | 50   | 3,13 |
| -     | SMD_1007 | 51   | 2,66 | 27   | 2,97 |
| soxR  | SMD_1008 | 21   | 3,11 | 19   | 1,76 |
| proC  | SMD_1011 | 37   | 2,66 | 39   | 2,66 |
| pilT  | SMD_1013 | 32   | 3,66 | 38   | 4,27 |
| -     | SMD_1015 | 32   | 3,04 | 40   | 3,27 |
| -     | SMD_1018 | 92   | 3,16 | 49   | 4,02 |
| tag   | SMD_1019 | 70   | 3,75 | 79   | 3,19 |
| yqgE  | SMD_1021 | 45   | 3,96 | 54   | 3,54 |
| -     | SMD_1022 | 44   | 3,65 | 27   | 7,11 |
| pyrB  | SMD_1023 | 101  | 3,07 | 99   | 2,95 |
| -     | SMD_1024 | 154  | 3,19 | 217  | 3,15 |
| -     | SMD_1025 | 41   | 4,77 | 41   | 5,21 |
| mgtE  | SMD_1026 | 38   | 3,52 | 69   | 3,50 |

|      |          |      |      |      |      |
|------|----------|------|------|------|------|
| ptsl | SMD_1027 | 64   | 2,81 | 66   | 2,69 |
| -    | SMD_1030 | 79   | 2,65 | 97   | 2,71 |
| -    | SMD_1031 | 82   | 2,59 | 32   | 3,65 |
| -    | SMD_1032 | 82   | 3,34 | 59   | 2,65 |
| yhbH | SMD_1033 | 305  | 2,73 | 455  | 2,59 |
| rpoN | SMD_1034 | 105  | 2,64 | 85   | 2,64 |
| lptB | SMD_1035 | 136  | 2,50 | 182  | 2,60 |
| -    | SMD_1036 | 118  | 2,75 | 122  | 3,22 |
| -    | SMD_1037 | 41   | 2,41 | 36   | 2,24 |
| kdsC | SMD_1038 | 87   | 2,60 | 62   | 3,51 |
| kdsD | SMD_1039 | 69   | 3,01 | 65   | 3,62 |
| -    | SMD_1040 | 83   | 2,56 | 67   | 2,73 |
| murA | SMD_1041 | 92   | 2,88 | 68   | 2,88 |
| -    | SMD_1043 | 93   | 2,89 | 63   | 2,01 |
| purN | SMD_1045 | 43   | 3,46 | 51   | 3,38 |
| purM | SMD_1049 | 85   | 3,48 | 105  | 3,64 |
| -    | SMD_1050 | 39   | 3,82 | 49   | 3,78 |
| -    | SMD_1051 | 114  | 2,90 | 102  | 3,32 |
| -    | SMD_1052 | 153  | 2,43 | 128  | 2,33 |
| -    | SMD_1053 | 90   | 1,82 | 99   | 2,79 |
| -    | SMD_1054 | 79   | 2,28 | 100  | 2,80 |
| -    | SMD_1055 | 54   | 1,49 | 133  | 2,46 |
| -    | SMD_1056 | 127  | 2,51 | 288  | 2,34 |
| -    | SMD_1057 | 4146 | 9,92 | 7805 | 8,73 |
| -    | SMD_1059 | 31   | 1,80 | 26   | 2,93 |
| -    | SMD_1060 | 145  | 2,82 | 66   | 3,35 |
| -    | SMD_1061 | 81   | 2,48 | 74   | 2,80 |
| apbE | SMD_1062 | 141  | 2,59 | 203  | 2,09 |
| -    | SMD_1063 | 120  | 2,35 | 200  | 2,43 |
| -    | SMD_1064 | 67   | 2,78 | 103  | 2,61 |
| piuC | SMD_1068 | 101  | 1,78 | 65   | 2,03 |
| -    | SMD_1070 | 320  | 2,38 | 497  | 2,13 |
| -    | SMD_1071 | 41   | 2,98 | 26   | 3,35 |
| -    | SMD_1073 | 45   | 2,87 | 63   | 3,14 |
| -    | SMD_1075 | 119  | 1,95 | 148  | 2,39 |

|      |          |      |      |      |      |
|------|----------|------|------|------|------|
| sufD | SMD_1076 | 91   | 2,56 | 140  | 2,38 |
| sufB | SMD_1078 | 66   | 3,38 | 53   | 3,99 |
| -    | SMD_1079 | 23   | 3,39 | 16   | 4,50 |
| -    | SMD_1080 | 81   | 4,01 | 107  | 3,45 |
| -    | SMD_1081 | 71   | 3,99 | 42   | 5,05 |
| -    | SMD_1082 | 25   | 3,66 | 19   | 5,71 |
| -    | SMD_1085 | 1688 | 2,60 | 2448 | 2,57 |
| osmC | SMD_1086 | 245  | 2,74 | 232  | 3,61 |
| phzF | SMD_1087 | 57   | 3,41 | 58   | 2,53 |
| lysA | SMD_1089 | 136  | 2,79 | 126  | 2,87 |
| -    | SMD_1090 | 231  | 2,05 | 269  | 2,25 |
| murD | SMD_1091 | 168  | 2,19 | 195  | 1,89 |
| -    | SMD_1092 | 183  | 2,34 | 85   | 3,33 |
| ispB | SMD_1096 | 49   | 3,51 | 80   | 2,98 |
| ssb  | SMD_1108 | 446  | 2,47 | 467  | 2,62 |
| -    | SMD_1113 | 26   | 1,62 | 25   | 1,70 |
| -    | SMD_1120 | 23   | 2,72 | 17   | 3,50 |
| -    | SMD_1130 | 39   | 2,78 | 47   | 2,83 |
| -    | SMD_1131 | 44   | 3,54 | 36   | 4,09 |
| -    | SMD_1142 | 63   | 2,82 | 30   | 3,82 |
| -    | SMD_1143 | 195  | 2,29 | 210  | 2,83 |
| mgo  | SMD_1155 | 30   | 3,30 | 21   | 4,35 |
| -    | SMD_1158 | 35   | 6,17 | 52   | 6,54 |
| -    | SMD_1159 | 125  | 3,40 | 105  | 4,17 |
| -    | SMD_1160 | 64   | 2,99 | 56   | 4,05 |
| -    | SMD_1162 | 87   | 2,58 | 118  | 2,99 |
| -    | SMD_1163 | 172  | 2,41 | 269  | 2,46 |
| -    | SMD_1164 | 238  | 2,50 | 197  | 2,58 |
| -    | SMD_1165 | 269  | 2,32 | 321  | 2,32 |
| minE | SMD_1166 | 669  | 2,28 | 878  | 2,16 |
| minD | SMD_1167 | 746  | 2,35 | 955  | 2,48 |
| minC | SMD_1168 | 134  | 3,02 | 135  | 3,00 |
| -    | SMD_1169 | 49   | 2,26 | 35   | 3,95 |
| -    | SMD_1172 | 835  | 2,47 | 996  | 2,60 |
| -    | SMD_1173 | 74   | 2,38 | 50   | 2,24 |

|         |          |      |      |      |      |
|---------|----------|------|------|------|------|
| -       | SMD_1174 | 86   | 2,34 | 63   | 3,04 |
| -       | SMD_1180 | 85   | 2,77 | 89   | 3,15 |
| -       | SMD_1182 | 17   | 4,58 | 103  | 4,47 |
| -       | SMD_1184 | 67   | 2,68 | 70   | 4,35 |
| tesB    | SMD_1185 | 42   | 2,71 | 35   | 3,79 |
| -       | SMD_1186 | 47   | 2,02 | 71   | 2,82 |
| -       | SMD_1187 | 244  | 2,48 | 138  | 2,96 |
| -       | SMD_1188 | 291  | 2,52 | 259  | 2,31 |
| -       | SMD_1189 | 353  | 2,29 | 512  | 2,31 |
| uvrA    | SMD_1190 | 165  | 2,50 | 158  | 2,84 |
| rplU    | SMD_1191 | 4568 | 2,45 | 7731 | 2,19 |
| rpmA    | SMD_1192 | 2549 | 2,46 | 4726 | 2,31 |
| obg     | SMD_1193 | 302  | 2,00 | 276  | 3,01 |
| rpsT    | SMD_1194 | 553  | 2,50 | 809  | 2,47 |
| murJ    | SMD_1195 | 157  | 2,64 | 115  | 2,78 |
| ribF    | SMD_1196 | 108  | 2,56 | 120  | 3,14 |
| ileS    | SMD_1197 | 219  | 2,39 | 377  | 2,29 |
| lspA    | SMD_1198 | 251  | 1,82 | 294  | 2,35 |
| ispH    | SMD_1199 | 369  | 2,20 | 371  | 2,24 |
| -       | SMD_1200 | 55   | 2,33 | 53   | 2,44 |
| -       | SMD_1202 | 175  | 2,27 | 160  | 2,81 |
| -       | SMD_1203 | 68   | 2,45 | 71   | 2,70 |
| -       | SMD_1204 | 38   | 2,93 | 37   | 3,10 |
| -       | SMD_1211 | 80   | 3,35 | 21   | 5,17 |
| cyoA    | SMD_1213 | 542  | 2,45 | 956  | 2,22 |
| cyoB    | SMD_1214 | 1127 | 2,19 | 2155 | 2,09 |
| cyoC    | SMD_1215 | 1006 | 2,14 | 2031 | 1,99 |
| cyoD    | SMD_1216 | 337  | 1,73 | 675  | 2,28 |
| radA    | SMD_1218 | 64   | 3,50 | 74   | 4,57 |
| hsp90xo | SMD_1219 | 62   | 2,81 | 62   | 3,44 |
| -       | SMD_1220 | 218  | 2,26 | 255  | 2,24 |
| -       | SMD_1221 | 351  | 2,19 | 321  | 2,34 |
| -       | SMD_1222 | 98   | 2,66 | 38   | 3,67 |
| ffh     | SMD_1223 | 121  | 2,71 | 112  | 3,20 |
| -       | SMD_1224 | 23   | 2,62 | 22   | 3,14 |

|       |          |      |      |      |      |
|-------|----------|------|------|------|------|
| -     | SMD_1225 | 29   | 3,29 | 23   | 2,29 |
| rpsP  | SMD_1226 | 938  | 2,64 | 1133 | 2,72 |
| rimM  | SMD_1227 | 203  | 2,69 | 198  | 3,08 |
| rplS  | SMD_1229 | 1081 | 2,88 | 1658 | 2,81 |
| -     | SMD_1232 | 20   | 4,29 | 24   | 3,47 |
| -     | SMD_1234 | 54   | 5,01 | 39   | 4,51 |
| -     | SMD_1236 | 179  | 2,85 | 178  | 3,31 |
| katA2 | SMD_1237 | 93   | 3,18 | 86   | 3,60 |
| mutS  | SMD_1238 | 45   | 3,18 | 52   | 3,47 |
| -     | SMD_1241 | 182  | 2,66 | 63   | 4,25 |
| -     | SMD_1243 | 29   | 2,46 | 22   | 3,42 |
| -     | SMD_1245 | 39   | 3,13 | 32   | 4,09 |
| -     | SMD_1249 | 25   | 5,52 | 32   | 3,83 |
| -     | SMD_1251 | 118  | 2,32 | 68   | 2,12 |
| -     | SMD_1252 | 169  | 1,88 | 157  | 2,53 |
| dat   | SMD_1253 | 365  | 2,14 | 313  | 2,05 |
| -     | SMD_1256 | 57   | 2,87 | 31   | 3,06 |
| -     | SMD_1257 | 62   | 2,47 | 24   | 3,17 |
| -     | SMD_1258 | 77   | 2,47 | 49   | 2,59 |
| -     | SMD_1260 | 26   | 1,68 | 20   | 3,65 |
| nfi   | SMD_1267 | 26   | 3,72 | 24   | 5,10 |
| gpmA  | SMD_1268 | 164  | 3,09 | 171  | 3,27 |
| -     | SMD_1269 | 255  | 2,18 | 376  | 2,20 |
| mfd   | SMD_1271 | 121  | 2,56 | 106  | 2,83 |
| -     | SMD_1272 | 100  | 2,52 | 105  | 4,33 |
| -     | SMD_1273 | 36   | 2,88 | 36   | 3,57 |
| gltX  | SMD_1279 | 255  | 2,43 | 259  | 2,92 |
| -     | SMD_1281 | 97   | 2,53 | 94   | 2,95 |
| -     | SMD_1285 | 38   | 2,45 | 52   | 2,42 |
| -     | SMD_1286 | 1079 | 2,15 | 4131 | 1,71 |
| -     | SMD_1290 | 35   | 3,47 | 24   | 4,05 |
| -     | SMD_1291 | 34   | 1,51 | 34   | 2,68 |
| -     | SMD_1293 | 84   | 2,94 | 84   | 3,36 |
| -     | SMD_1295 | 515  | 2,64 | 176  | 4,48 |
| deaD  | SMD_1296 | 103  | 3,31 | 84   | 3,97 |



|      |          |      |      |      |      |
|------|----------|------|------|------|------|
| -    | SMD_1298 | 32   | 2,87 | 20   | 4,71 |
| -    | SMD_1300 | 23   | 3,86 | 18   | 3,62 |
| -    | SMD_1301 | 42   | 4,30 | 26   | 6,24 |
| -    | SMD_1302 | 55   | 4,02 | 34   | 6,74 |
| -    | SMD_1305 | 25   | 3,57 | 36   | 3,33 |
| -    | SMD_1306 | 57   | 2,48 | 50   | 2,89 |
| agp  | SMD_1307 | 33   | 2,71 | 23   | 4,65 |
| -    | SMD_1308 | 22   | 2,30 | 16   | 3,67 |
| -    | SMD_1309 | 192  | 2,13 | 275  | 2,48 |
| -    | SMD_1310 | 22   | 1,64 | 39   | 3,35 |
| -    | SMD_1311 | 50   | 3,28 | 38   | 3,98 |
| accA | SMD_1321 | 374  | 2,20 | 507  | 2,24 |
| -    | SMD_1322 | 220  | 1,72 | 270  | 2,22 |
| dnaE | SMD_1323 | 181  | 2,40 | 171  | 2,61 |
| rnhB | SMD_1324 | 211  | 2,43 | 278  | 2,19 |
| lpxB | SMD_1325 | 185  | 2,38 | 210  | 2,60 |
| lpxA | SMD_1326 | 329  | 2,22 | 485  | 2,44 |
| fabZ | SMD_1327 | 507  | 2,46 | 621  | 2,46 |
| lpxD | SMD_1328 | 200  | 2,24 | 192  | 2,68 |
| -    | SMD_1329 | 419  | 2,20 | 539  | 2,19 |
| -    | SMD_1330 | 190  | 2,12 | 167  | 2,54 |
| dxr  | SMD_1331 | 182  | 2,01 | 214  | 2,35 |
| cdsA | SMD_1332 | 210  | 2,40 | 275  | 2,62 |
| uppS | SMD_1333 | 249  | 2,49 | 362  | 2,42 |
| frr  | SMD_1334 | 562  | 2,29 | 791  | 2,62 |
| pyrH | SMD_1335 | 268  | 2,49 | 374  | 2,68 |
| -    | SMD_1336 | 43   | 3,63 | 46   | 3,17 |
| tsf  | SMD_1337 | 760  | 2,52 | 1721 | 2,63 |
| rpsB | SMD_1338 | 1396 | 2,78 | 2407 | 2,78 |
| map  | SMD_1345 | 281  | 2,41 | 433  | 2,24 |
| glnD | SMD_1346 | 123  | 2,44 | 121  | 2,63 |
| dapD | SMD_1347 | 435  | 2,12 | 702  | 1,98 |
| -    | SMD_1348 | 133  | 2,34 | 201  | 2,38 |
| dapE | SMD_1350 | 79   | 2,42 | 73   | 2,34 |
| -    | SMD_1351 | 39   | 2,35 | 40   | 1,57 |

|       |          |      |      |      |      |
|-------|----------|------|------|------|------|
| asnB  | SMD_1352 | 83   | 3,35 | 101  | 3,65 |
| -     | SMD_1354 | 33   | 3,63 | 24   | 3,03 |
| bfr3  | SMD_1355 | 173  | 2,41 | 318  | 2,71 |
| parC  | SMD_1356 | 261  | 2,44 | 350  | 2,55 |
| -     | SMD_1358 | 30   | 2,58 | 77   | 3,17 |
| -     | SMD_1359 | 25   | 3,30 | 103  | 2,77 |
| emrA  | SMD_1360 | 74   | 2,72 | 227  | 2,34 |
| emrB  | SMD_1361 | 78   | 2,49 | 234  | 2,67 |
| rnr   | SMD_1367 | 102  | 2,20 | 128  | 2,56 |
| -     | SMD_1368 | 104  | 2,07 | 139  | 1,70 |
| rlmB  | SMD_1369 | 142  | 2,74 | 200  | 2,79 |
| -     | SMD_1370 | 75   | 2,72 | 74   | 2,73 |
| -     | SMD_1374 | 29   | 3,10 | 34   | 2,89 |
| rnt   | SMD_1375 | 64   | 3,51 | 53   | 3,54 |
| -     | SMD_1379 | 21   | 9,52 | 53   | 6,07 |
| nth   | SMD_1387 | 23   | 1,52 | 36   | 1,39 |
| crt2  | SMD_1389 | 49   | 3,48 | 70   | 3,09 |
| -     | SMD_1390 | 1209 | 2,43 | 1588 | 2,49 |
| -     | SMD_1391 | 85   | 2,85 | 57   | 3,68 |
| -     | SMD_1392 | 72   | 2,63 | 59   | 3,05 |
| ampDI | SMD_1393 | 61   | 3,52 | 50   | 4,94 |
| rlmL  | SMD_1395 | 59   | 3,00 | 56   | 3,02 |
| -     | SMD_1397 | 27   | 3,12 | 23   | 3,27 |
| -     | SMD_1400 | 75   | 2,89 | 68   | 2,99 |
| -     | SMD_1403 | 25   | 3,03 | 28   | 2,44 |
| -     | SMD_1406 | 45   | 1,87 | 21   | 3,15 |
| -     | SMD_1407 | 59   | 2,97 | 33   | 4,47 |
| -     | SMD_1410 | 18   | 2,48 | 21   | 1,75 |
| potF  | SMD_1411 | 239  | 2,31 | 604  | 2,22 |
| potG  | SMD_1412 | 141  | 2,24 | 176  | 2,46 |
| potH  | SMD_1413 | 125  | 2,38 | 172  | 2,47 |
| potI  | SMD_1414 | 133  | 2,44 | 119  | 2,61 |
| -     | SMD_1415 | 70   | 2,62 | 50   | 2,57 |
| corA  | SMD_1416 | 68   | 2,12 | 32   | 2,61 |
| corC  | SMD_1418 | 169  | 2,12 | 142  | 2,65 |

|       |          |     |      |     |      |
|-------|----------|-----|------|-----|------|
| -     | SMD_1420 | 86  | 3,04 | 78  | 2,37 |
| -     | SMD_1421 | 97  | 2,20 | 160 | 2,57 |
| -     | SMD_1422 | 71  | 1,91 | 95  | 2,51 |
| -     | SMD_1425 | 88  | 2,51 | 77  | 3,20 |
| sspA  | SMD_1433 | 64  | 2,57 | 50  | 2,43 |
| sspB  | SMD_1434 | 80  | 3,19 | 53  | 2,34 |
| nadC  | SMD_1437 | 104 | 2,30 | 117 | 2,89 |
| -     | SMD_1438 | 109 | 2,96 | 149 | 2,90 |
| purE  | SMD_1439 | 52  | 2,75 | 57  | 3,85 |
| purK  | SMD_1440 | 87  | 2,51 | 144 | 3,03 |
| -     | SMD_1441 | 83  | 2,53 | 90  | 2,78 |
| -     | SMD_1443 | 56  | 3,01 | 48  | 4,60 |
| -     | SMD_1445 | 515 | 2,16 | 915 | 2,09 |
| -     | SMD_1446 | 178 | 2,63 | 328 | 2,31 |
| fimU  | SMD_1447 | 61  | 3,62 | 39  | 3,22 |
| pilW  | SMD_1449 | 38  | 3,09 | 30  | 3,41 |
| pilX  | SMD_1450 | 86  | 2,33 | 95  | 2,46 |
| pilY1 | SMD_1451 | 169 | 2,14 | 146 | 2,14 |
| pilE  | SMD_1452 | 164 | 2,36 | 202 | 2,24 |
| uvrB  | SMD_1455 | 32  | 2,71 | 25  | 2,80 |
| -     | SMD_1458 | 54  | 3,57 | 27  | 5,41 |
| -     | SMD_1459 | 31  | 3,55 | 31  | 6,49 |
| -     | SMD_1460 | 57  | 2,55 | 42  | 4,99 |
| -     | SMD_1462 | 37  | 2,75 | 38  | 3,52 |
| -     | SMD_1464 | 100 | 3,54 | 99  | 2,97 |
| lpxK  | SMD_1467 | 117 | 2,10 | 161 | 2,06 |
| kdsB  | SMD_1468 | 102 | 2,28 | 139 | 2,10 |
| -     | SMD_1469 | 79  | 1,38 | 77  | 2,32 |
| -     | SMD_1470 | 93  | 1,90 | 79  | 2,73 |
| uvrC  | SMD_1471 | 111 | 1,90 | 79  | 2,14 |
| pgsA  | SMD_1472 | 136 | 2,31 | 146 | 2,27 |
| smmD2 | SMD_1476 | 21  | 3,39 | 18  | 2,81 |
| -     | SMD_1479 | 73  | 2,85 | 58  | 3,42 |
| -     | SMD_1480 | 35  | 3,95 | 44  | 2,63 |
| -     | SMD_1483 | 76  | 3,52 | 31  | 4,59 |

|      |          |     |      |     |       |
|------|----------|-----|------|-----|-------|
| copC | SMD_1486 | 17  | 5,70 | 17  | 11,90 |
| -    | SMD_1499 | 31  | 1,45 | 30  | 3,13  |
| -    | SMD_1506 | 33  | 4,01 | 47  | 2,63  |
| -    | SMD_1507 | 47  | 3,38 | 40  | 4,85  |
| -    | SMD_1508 | 69  | 2,91 | 29  | 2,99  |
| -    | SMD_1515 | 44  | 2,94 | 27  | 3,44  |
| -    | SMD_1524 | 24  | 1,64 | 19  | 1,55  |
| -    | SMD_1526 | 97  | 2,65 | 93  | 3,00  |
| -    | SMD_1527 | 167 | 2,50 | 132 | 3,35  |
| -    | SMD_1530 | 181 | 2,56 | 148 | 3,70  |
| -    | SMD_1532 | 165 | 2,65 | 139 | 2,98  |
| -    | SMD_1559 | 48  | 3,08 | 54  | 3,23  |
| cadA | SMD_1565 | 49  | 2,10 | 66  | 2,33  |
| czcD | SMD_1566 | 52  | 3,28 | 22  | 4,30  |
| -    | SMD_1578 | 33  | 3,00 | 22  | 3,50  |
| -    | SMD_1583 | 107 | 2,15 | 70  | 2,57  |
| -    | SMD_1585 | 125 | 2,38 | 91  | 2,07  |
| -    | SMD_1586 | 370 | 1,62 | 260 | 2,05  |
| -    | SMD_1591 | 126 | 2,42 | 25  | 5,35  |
| -    | SMD_1592 | 52  | 3,54 | 62  | 3,16  |
| -    | SMD_1593 | 21  | 4,07 | 27  | 3,56  |
| -    | SMD_1619 | 91  | 2,25 | 85  | 3,29  |
| -    | SMD_1622 | 28  | 3,56 | 17  | 4,71  |
| -    | SMD_1627 | 24  | 3,20 | 24  | 4,55  |
| wbpO | SMD_1633 | 77  | 2,65 | 71  | 3,15  |
| -    | SMD_1634 | 54  | 2,34 | 53  | 3,25  |
| fkpP | SMD_1637 | 32  | 1,59 | 41  | 3,89  |
| -    | SMD_1639 | 47  | 3,20 | 22  | 5,01  |
| -    | SMD_1640 | 26  | 3,24 | 20  | 3,28  |
| -    | SMD_1641 | 107 | 2,72 | 45  | 4,42  |
| exoD | SMD_1642 | 55  | 2,76 | 35  | 3,48  |
| -    | SMD_1643 | 116 | 3,07 | 39  | 4,17  |
| -    | SMD_1644 | 144 | 2,64 | 257 | 2,20  |
| pitA | SMD_1645 | 184 | 2,53 | 268 | 2,44  |
| -    | SMD_1647 | 53  | 2,73 | 28  | 2,84  |

|      |          |     |      |     |      |
|------|----------|-----|------|-----|------|
| parE | SMD_1648 | 167 | 2,00 | 233 | 2,44 |
| -    | SMD_1650 | 299 | 4,51 | 195 | 6,19 |
| pyrG | SMD_1651 | 88  | 2,75 | 162 | 2,40 |
| kdsA | SMD_1652 | 151 | 2,64 | 202 | 2,85 |
| -    | SMD_1653 | 99  | 2,06 | 116 | 2,67 |
| -    | SMD_1654 | 44  | 1,28 | 50  | 1,47 |
| eno  | SMD_1655 | 233 | 2,60 | 262 | 2,81 |
| ftsB | SMD_1656 | 309 | 2,46 | 431 | 2,61 |
| ispD | SMD_1657 | 196 | 2,14 | 241 | 2,54 |
| ispF | SMD_1658 | 140 | 1,79 | 131 | 2,34 |
| truD | SMD_1659 | 146 | 2,30 | 186 | 1,98 |
| surE | SMD_1661 | 156 | 2,99 | 142 | 3,24 |
| pcm  | SMD_1662 | 84  | 3,10 | 79  | 2,17 |
| -    | SMD_1663 | 162 | 2,32 | 135 | 2,54 |
| nlpD | SMD_1664 | 469 | 2,24 | 709 | 2,23 |
| -    | SMD_1665 | 225 | 2,42 | 144 | 3,09 |
| -    | SMD_1666 | 153 | 2,13 | 88  | 2,38 |
| -    | SMD_1667 | 123 | 1,35 | 90  | 3,01 |
| ftsJ | SMD_1668 | 102 | 3,11 | 37  | 4,00 |
| ftsH | SMD_1669 | 119 | 2,48 | 118 | 3,02 |
| -    | SMD_1670 | 62  | 1,30 | 80  | 2,65 |
| folP | SMD_1671 | 56  | 2,49 | 80  | 2,67 |
| hfq  | SMD_1673 | 289 | 2,54 | 325 | 2,54 |
| hflX | SMD_1674 | 369 | 2,15 | 434 | 2,68 |
| -    | SMD_1675 | 98  | 2,60 | 56  | 3,66 |
| lexA | SMD_1677 | 140 | 3,98 | 61  | 5,66 |
| recA | SMD_1678 | 351 | 2,71 | 469 | 2,91 |
| recX | SMD_1679 | 208 | 2,97 | 226 | 2,42 |
| alaS | SMD_1680 | 271 | 2,73 | 284 | 2,81 |
| csrA | SMD_1681 | 245 | 1,19 | 382 | 2,89 |
| -    | SMD_1697 | 19  | 1,58 | 31  | 2,96 |
| -    | SMD_1705 | 152 | 1,82 | 108 | 2,47 |
| -    | SMD_1706 | 158 | 2,04 | 107 | 2,98 |
| -    | SMD_1707 | 64  | 1,51 | 57  | 2,75 |
| -    | SMD_1708 | 59  | 2,84 | 35  | 3,98 |

|      |          |     |      |      |      |
|------|----------|-----|------|------|------|
| dapA | SMD_1709 | 76  | 3,31 | 70   | 3,46 |
| -    | SMD_1710 | 457 | 2,51 | 734  | 2,38 |
| -    | SMD_1711 | 118 | 2,85 | 121  | 3,49 |
| pcnB | SMD_1714 | 75  | 2,72 | 60   | 2,65 |
| folK | SMD_1715 | 59  | 1,52 | 33   | 2,96 |
| panB | SMD_1716 | 188 | 2,68 | 206  | 2,49 |
| panC | SMD_1717 | 163 | 2,78 | 180  | 2,60 |
| panD | SMD_1718 | 412 | 2,62 | 562  | 2,72 |
| pgi  | SMD_1719 | 219 | 2,46 | 252  | 2,71 |
| -    | SMD_1721 | 46  | 3,42 | 26   | 4,85 |
| ispG | SMD_1722 | 117 | 2,33 | 97   | 3,74 |
| -    | SMD_1724 | 170 | 2,48 | 125  | 2,83 |
| kgdA | SMD_1725 | 278 | 1,70 | 401  | 2,37 |
| edd  | SMD_1726 | 76  | 2,33 | 91   | 2,28 |
| zwf  | SMD_1729 | 19  | 3,30 | 29   | 3,15 |
| -    | SMD_1730 | 35  | 3,29 | 18   | 3,74 |
| -    | SMD_1731 | 36  | 3,76 | 23   | 3,26 |
| sdhC | SMD_1732 | 139 | 3,17 | 181  | 3,91 |
| sdhD | SMD_1733 | 354 | 2,73 | 239  | 2,90 |
| sdhA | SMD_1734 | 700 | 2,22 | 840  | 2,47 |
| sdhB | SMD_1735 | 699 | 1,97 | 1045 | 1,92 |
| -    | SMD_1738 | 95  | 2,57 | 97   | 2,66 |
| -    | SMD_1740 | 192 | 2,70 | 158  | 2,89 |
| -    | SMD_1741 | 145 | 2,86 | 99   | 2,63 |
| mutY | SMD_1742 | 66  | 2,95 | 49   | 2,95 |
| ftsY | SMD_1743 | 82  | 2,24 | 96   | 3,07 |
| -    | SMD_1744 | 740 | 2,25 | 467  | 3,06 |
| htpG | SMD_1745 | 675 | 2,42 | 555  | 2,65 |
| coaD | SMD_1747 | 124 | 2,86 | 103  | 3,10 |
| -    | SMD_1748 | 643 | 2,26 | 1329 | 2,12 |
| fdx  | SMD_1749 | 413 | 2,33 | 385  | 2,67 |
| ggt  | SMD_1750 | 181 | 2,38 | 219  | 2,35 |
| -    | SMD_1751 | 64  | 2,60 | 82   | 2,75 |
| -    | SMD_1754 | 173 | 3,01 | 134  | 3,77 |
| upp  | SMD_1755 | 84  | 2,87 | 110  | 2,95 |

|      |          |      |      |      |      |
|------|----------|------|------|------|------|
| -    | SMD_1761 | 129  | 2,64 | 238  | 2,59 |
| -    | SMD_1780 | 140  | 2,74 | 90   | 3,98 |
| -    | SMD_1781 | 40   | 2,62 | 28   | 3,00 |
| -    | SMD_1784 | 47   | 4,04 | 22   | 4,29 |
| smpB | SMD_1785 | 125  | 2,58 | 60   | 3,70 |
| -    | SMD_1786 | 145  | 3,17 | 115  | 4,61 |
| -    | SMD_1787 | 129  | 3,27 | 118  | 3,71 |
| fur  | SMD_1788 | 54   | 2,66 | 88   | 3,08 |
| -    | SMD_1789 | 29   | 3,32 | 34   | 3,06 |
| -    | SMD_1790 | 48   | 3,21 | 51   | 2,73 |
| recN | SMD_1791 | 50   | 2,89 | 45   | 3,19 |
| hrcA | SMD_1792 | 35   | 3,29 | 21   | 3,18 |
| grpE | SMD_1793 | 656  | 2,20 | 691  | 2,38 |
| dnaK | SMD_1794 | 1689 | 2,37 | 1515 | 2,50 |
| dnaJ | SMD_1795 | 623  | 1,93 | 479  | 2,45 |
| -    | SMD_1796 | 117  | 1,31 | 122  | 1,42 |
| pdxK | SMD_1798 | 52   | 2,95 | 63   | 2,84 |
| tyrA | SMD_1799 | 81   | 1,38 | 73   | 2,30 |
| -    | SMD_1801 | 33   | 2,83 | 25   | 3,07 |
| -    | SMD_1802 | 49   | 2,74 | 24   | 3,10 |
| -    | SMD_1805 | 46   | 2,29 | 51   | 2,39 |
| -    | SMD_1806 | 71   | 3,45 | 28   | 5,52 |
| -    | SMD_1807 | 68   | 2,28 | 89   | 2,79 |
| queA | SMD_1808 | 57   | 3,11 | 49   | 3,06 |
| tgt  | SMD_1809 | 100  | 2,83 | 130  | 2,61 |
| yajC | SMD_1810 | 231  | 2,24 | 367  | 2,34 |
| secD | SMD_1811 | 261  | 2,49 | 403  | 2,53 |
| secF | SMD_1812 | 455  | 2,10 | 535  | 2,11 |
| -    | SMD_1813 | 338  | 2,50 | 368  | 2,52 |
| -    | SMD_1814 | 125  | 2,62 | 104  | 2,83 |
| cspA | SMD_1819 | 2378 | 1,76 | 4507 | 1,81 |
| -    | SMD_1821 | 39   | 2,18 | 25   | 2,93 |
| apt  | SMD_1822 | 107  | 1,99 | 86   | 2,53 |
| uup  | SMD_1826 | 99   | 2,65 | 83   | 2,78 |
| -    | SMD_1827 | 99   | 2,68 | 56   | 3,09 |

|       |          |      |      |      |      |
|-------|----------|------|------|------|------|
| -     | SMD_1828 | 26   | 2,60 | 35   | 5,27 |
| smml  | SMD_1831 | 24   | 2,59 | 19   | 2,73 |
| -     | SMD_1832 | 76   | 2,25 | 71   | 2,85 |
| -     | SMD_1834 | 116  | 2,40 | 101  | 3,28 |
| -     | SMD_1835 | 109  | 2,90 | 147  | 2,74 |
| -     | SMD_1836 | 43   | 3,07 | 55   | 2,14 |
| rpmJ2 | SMD_1837 | 416  | 2,68 | 1444 | 2,09 |
| cmk   | SMD_1838 | 621  | 2,62 | 971  | 2,33 |
| rpsA  | SMD_1839 | 4557 | 2,06 | 7217 | 2,04 |
| ihfB  | SMD_1840 | 829  | 2,41 | 496  | 2,49 |
| -     | SMD_1842 | 211  | 2,63 | 171  | 2,53 |
| wbpL  | SMD_1843 | 149  | 2,88 | 141  | 2,73 |
| wbil  | SMD_1844 | 146  | 2,29 | 120  | 2,63 |
| galU  | SMD_1845 | 345  | 2,19 | 434  | 2,25 |
| -     | SMD_1846 | 166  | 2,27 | 226  | 2,00 |
| -     | SMD_1847 | 161  | 1,82 | 191  | 2,25 |
| ndk   | SMD_1849 | 767  | 2,49 | 1815 | 2,51 |
| rlmN  | SMD_1850 | 109  | 2,14 | 121  | 2,65 |
| -     | SMD_1852 | 120  | 2,64 | 92   | 2,97 |
| -     | SMD_1853 | 139  | 2,50 | 97   | 2,82 |
| -     | SMD_1854 | 339  | 2,31 | 361  | 2,39 |
| engA  | SMD_1855 | 241  | 2,03 | 288  | 2,45 |
| -     | SMD_1856 | 54   | 2,00 | 26   | 2,48 |
| folD  | SMD_1858 | 47   | 2,76 | 66   | 2,93 |
| guaB  | SMD_1859 | 117  | 2,60 | 97   | 3,14 |
| guaA  | SMD_1861 | 177  | 2,02 | 307  | 2,19 |
| hsdR  | SMD_1862 | 52   | 2,72 | 45   | 3,13 |
| hsdM  | SMD_1863 | 121  | 2,22 | 162  | 2,26 |
| hsdS  | SMD_1864 | 149  | 1,84 | 192  | 1,85 |
| -     | SMD_1865 | 100  | 2,25 | 145  | 2,03 |
| -     | SMD_1866 | 138  | 2,27 | 143  | 1,87 |
| -     | SMD_1868 | 18   | 1,62 | 21   | 3,09 |
| -     | SMD_1874 | 47   | 2,24 | 34   | 3,98 |
| -     | SMD_1885 | 27   | 2,40 | 27   | 2,73 |
| -     | SMD_1886 | 18   | 3,71 | 28   | 3,12 |



|      |          |     |      |     |      |
|------|----------|-----|------|-----|------|
| -    | SMD_1887 | 26  | 3,12 | 21  | 1,71 |
| -    | SMD_1889 | 17  | 1,44 | 28  | 2,70 |
| -    | SMD_1913 | 114 | 1,93 | 107 | 2,19 |
| murB | SMD_1914 | 137 | 1,94 | 184 | 2,11 |
| pyrD | SMD_1915 | 53  | 2,73 | 98  | 2,65 |
| -    | SMD_1917 | 60  | 3,19 | 23  | 4,97 |
| -    | SMD_1918 | 65  | 2,48 | 57  | 2,17 |
| -    | SMD_1919 | 196 | 2,40 | 441 | 2,32 |
| -    | SMD_1923 | 76  | 2,65 | 34  | 4,09 |
| -    | SMD_1924 | 57  | 3,00 | 36  | 3,49 |
| -    | SMD_1926 | 76  | 2,42 | 60  | 2,48 |
| -    | SMD_1927 | 197 | 2,04 | 158 | 2,51 |
| -    | SMD_1929 | 144 | 2,34 | 172 | 2,40 |
| -    | SMD_1934 | 36  | 2,20 | 30  | 3,26 |
| -    | SMD_1935 | 51  | 3,03 | 17  | 4,32 |
| thrB | SMD_1940 | 19  | 2,29 | 29  | 2,74 |
| thrC | SMD_1941 | 32  | 2,96 | 51  | 2,96 |
| hisS | SMD_1943 | 177 | 2,63 | 184 | 2,73 |
| hisB | SMD_1949 | 31  | 1,43 | 29  | 1,76 |
| hisA | SMD_1951 | 25  | 2,35 | 72  | 1,80 |
| hisF | SMD_1952 | 57  | 2,50 | 61  | 1,52 |
| -    | SMD_1954 | 46  | 3,16 | 45  | 2,51 |
| -    | SMD_1956 | 52  | 2,31 | 42  | 2,99 |
| -    | SMD_1957 | 133 | 2,41 | 130 | 2,44 |
| cutC | SMD_1958 | 58  | 2,08 | 67  | 2,19 |
| actP | SMD_1960 | 22  | 1,99 | 24  | 2,87 |
| -    | SMD_1963 | 209 | 2,55 | 191 | 2,80 |
| -    | SMD_1964 | 116 | 2,32 | 97  | 2,41 |
| -    | SMD_1965 | 182 | 2,12 | 127 | 2,32 |
| -    | SMD_1966 | 159 | 2,01 | 207 | 1,93 |
| scrK | SMD_1967 | 296 | 2,04 | 343 | 2,04 |
| -    | SMD_1968 | 305 | 2,01 | 370 | 1,86 |
| bmnA | SMD_1969 | 89  | 2,28 | 92  | 2,06 |
| masA | SMD_1970 | 179 | 2,92 | 255 | 2,31 |
| mtnD | SMD_1971 | 71  | 3,29 | 84  | 2,62 |

|       |          |     |      |     |      |
|-------|----------|-----|------|-----|------|
| mtnB  | SMD_1972 | 83  | 2,54 | 75  | 3,03 |
| -     | SMD_1973 | 73  | 1,87 | 105 | 2,09 |
| -     | SMD_1974 | 72  | 2,39 | 85  | 2,83 |
| serA  | SMD_1976 | 72  | 2,80 | 62  | 3,12 |
| -     | SMD_1977 | 26  | 2,98 | 25  | 3,40 |
| -     | SMD_1978 | 65  | 1,44 | 46  | 2,97 |
| -     | SMD_1979 | 64  | 2,43 | 79  | 2,67 |
| -     | SMD_1980 | 109 | 2,44 | 92  | 2,59 |
| -     | SMD_1981 | 37  | 3,01 | 42  | 2,50 |
| smeZ  | SMD_1983 | 104 | 1,98 | 75  | 2,24 |
| -     | SMD_1984 | 140 | 1,64 | 91  | 2,16 |
| -     | SMD_1985 | 440 | 2,34 | 385 | 2,29 |
| efp2  | SMD_1986 | 553 | 2,13 | 730 | 2,47 |
| -     | SMD_1987 | 124 | 2,95 | 103 | 3,08 |
| hmgcL | SMD_1988 | 37  | 2,55 | 58  | 2,96 |
| -     | SMD_1990 | 20  | 1,44 | 30  | 2,28 |
| feoA  | SMD_1991 | 40  | 2,87 | 21  | 1,73 |
| feoB  | SMD_1992 | 62  | 2,36 | 40  | 2,60 |
| -     | SMD_1993 | 77  | 1,25 | 65  | 2,73 |
| -     | SMD_1994 | 422 | 2,09 | 233 | 2,37 |
| dapB  | SMD_1998 | 58  | 2,37 | 54  | 2,32 |
| carA  | SMD_1999 | 144 | 2,78 | 132 | 2,86 |
| carB  | SMD_2000 | 266 | 2,11 | 349 | 2,36 |
| greA  | SMD_2001 | 563 | 2,21 | 866 | 2,29 |
| -     | SMD_2002 | 201 | 2,23 | 246 | 2,22 |
| -     | SMD_2003 | 65  | 2,52 | 36  | 3,21 |
| recJ  | SMD_2004 | 30  | 3,06 | 23  | 3,08 |
| prfB  | SMD_2008 | 366 | 2,07 | 463 | 2,44 |
| -     | SMD_2009 | 100 | 1,31 | 95  | 2,96 |
| ilvK  | SMD_2012 | 35  | 2,88 | 30  | 3,32 |
| lysS  | SMD_2013 | 271 | 2,67 | 321 | 2,66 |
| rpfG  | SMD_2014 | 102 | 2,61 | 121 | 2,45 |
| rpfC  | SMD_2015 | 93  | 2,63 | 93  | 2,59 |
| rpfF  | SMD_2016 | 264 | 3,36 | 213 | 3,90 |
| fadD  | SMD_2017 | 63  | 2,97 | 61  | 3,55 |

|          |          |     |      |      |      |
|----------|----------|-----|------|------|------|
| betA     | SMD_2018 | 46  | 2,84 | 55   | 2,85 |
| -        | SMD_2021 | 68  | 2,07 | 41   | 2,22 |
| acn      | SMD_2022 | 162 | 2,49 | 170  | 2,57 |
| acnB     | SMD_2025 | 726 | 2,27 | 1326 | 2,28 |
| -        | SMD_2032 | 183 | 2,19 | 486  | 2,89 |
| cheW     | SMD_2033 | 70  | 1,27 | 91   | 2,55 |
| -        | SMD_2035 | 22  | 3,52 | 27   | 2,65 |
| cheA     | SMD_2036 | 62  | 2,30 | 75   | 2,47 |
| -        | SMD_2038 | 93  | 1,37 | 132  | 2,18 |
| -        | SMD_2039 | 69  | 2,51 | 101  | 2,27 |
| -        | SMD_2040 | 50  | 2,37 | 65   | 2,95 |
| motB2    | SMD_2041 | 47  | 2,57 | 82   | 2,40 |
| cheA2    | SMD_2043 | 105 | 2,36 | 145  | 2,29 |
| cheZ     | SMD_2044 | 246 | 1,75 | 450  | 1,96 |
| cheY2    | SMD_2045 | 239 | 1,31 | 355  | 2,44 |
| fliA     | SMD_2046 | 98  | 2,23 | 210  | 2,37 |
| fleN     | SMD_2047 | 161 | 2,45 | 314  | 2,06 |
| fliH     | SMD_2048 | 99  | 2,29 | 190  | 2,11 |
| fliA     | SMD_2049 | 28  | 2,30 | 46   | 1,81 |
| fliP     | SMD_2054 | 34  | 1,66 | 77   | 2,08 |
| fliM     | SMD_2057 | 96  | 2,20 | 206  | 2,21 |
| fliK     | SMD_2059 | 48  | 2,06 | 128  | 2,12 |
| fliI     | SMD_2061 | 74  | 1,87 | 151  | 2,14 |
| fliH     | SMD_2062 | 97  | 2,36 | 158  | 2,06 |
| fliG     | SMD_2063 | 213 | 1,23 | 333  | 1,94 |
| fliF     | SMD_2064 | 67  | 1,41 | 134  | 2,21 |
| rpoN2    | SMD_2069 | 31  | 3,18 | 24   | 3,78 |
| -        | SMD_2070 | 31  | 3,37 | 44   | 3,03 |
| -        | SMD_2071 | 31  | 3,02 | 75   | 1,40 |
| -        | SMD_2072 | 121 | 2,49 | 173  | 2,22 |
| fliS     | SMD_2073 | 128 | 2,21 | 192  | 2,02 |
| fliD     | SMD_2074 | 81  | 2,24 | 156  | 2,27 |
| fliC2    | SMD_2075 | 299 | 2,47 | 650  | 3,05 |
| fliC+M24 | SMD_2076 | 195 | 2,56 | 308  | 2,99 |
| fliC3    | SMD_2077 | 42  | 3,50 | 38   | 3,67 |

|       |          |     |      |     |      |
|-------|----------|-----|------|-----|------|
| flgJ  | SMD_2078 | 89  | 2,04 | 185 | 1,89 |
| flgL  | SMD_2079 | 130 | 2,23 | 329 | 1,88 |
| flgH  | SMD_2082 | 138 | 1,94 | 229 | 1,97 |
| flgG  | SMD_2083 | 204 | 2,17 | 435 | 1,84 |
| flgF  | SMD_2084 | 90  | 2,06 | 248 | 1,97 |
| flgE  | SMD_2085 | 151 | 2,62 | 553 | 4,02 |
| flgC  | SMD_2087 | 70  | 2,26 | 111 | 1,93 |
| flgA  | SMD_2090 | 30  | 1,86 | 45  | 1,51 |
| -     | SMD_2099 | 45  | 2,04 | 32  | 2,84 |
| -     | SMD_2100 | 69  | 2,33 | 81  | 2,14 |
| mnmA  | SMD_2101 | 167 | 2,49 | 161 | 2,23 |
| -     | SMD_2102 | 69  | 1,44 | 97  | 2,66 |
| -     | SMD_2105 | 49  | 2,59 | 21  | 3,13 |
| clpA  | SMD_2106 | 71  | 2,67 | 68  | 3,35 |
| -     | SMD_2107 | 31  | 3,28 | 20  | 1,69 |
| infA  | SMD_2108 | 255 | 2,02 | 231 | 2,53 |
| -     | SMD_2110 | 41  | 3,55 | 33  | 3,33 |
| -     | SMD_2111 | 79  | 2,86 | 57  | 3,29 |
| trxB  | SMD_2112 | 178 | 2,85 | 267 | 2,50 |
| ftsK  | SMD_2113 | 97  | 2,58 | 85  | 3,06 |
| -     | SMD_2114 | 206 | 2,09 | 236 | 2,28 |
| lolA  | SMD_2115 | 186 | 2,21 | 264 | 2,45 |
| -     | SMD_2120 | 32  | 2,92 | 19  | 2,52 |
| -     | SMD_2121 | 24  | 1,98 | 17  | 1,97 |
| -     | SMD_2127 | 306 | 2,48 | 254 | 2,92 |
| -     | SMD_2129 | 93  | 3,51 | 90  | 3,42 |
| cusA3 | SMD_2133 | 29  | 2,42 | 28  | 2,39 |
| -     | SMD_2134 | 60  | 2,77 | 69  | 1,98 |
| -     | SMD_2135 | 168 | 2,40 | 178 | 2,43 |
| lspA2 | SMD_2136 | 99  | 1,14 | 65  | 1,34 |
| -     | SMD_2137 | 207 | 1,86 | 227 | 1,90 |
| glnB2 | SMD_2138 | 332 | 1,52 | 415 | 1,91 |
| cusA2 | SMD_2139 | 298 | 2,03 | 379 | 1,93 |
| cusB2 | SMD_2140 | 332 | 1,83 | 318 | 1,91 |
| smmJ2 | SMD_2141 | 238 | 1,86 | 262 | 2,03 |

|       |          |     |      |     |      |
|-------|----------|-----|------|-----|------|
| -     | SMD_2142 | 229 | 2,16 | 152 | 2,30 |
| -     | SMD_2143 | 102 | 2,63 | 60  | 2,71 |
| -     | SMD_2144 | 65  | 1,91 | 52  | 1,83 |
| nadE2 | SMD_2145 | 111 | 2,20 | 73  | 2,10 |
| -     | SMD_2146 | 62  | 2,32 | 78  | 2,19 |
| tnpA  | SMD_2147 | 37  | 2,23 | 26  | 2,99 |
| -     | SMD_2150 | 28  | 2,50 | 19  | 3,16 |
| -     | SMD_2163 | 45  | 2,32 | 45  | 2,39 |
| -     | SMD_2164 | 48  | 1,49 | 50  | 1,36 |
| -     | SMD_2165 | 29  | 2,51 | 30  | 3,17 |
| -     | SMD_2170 | 31  | 2,62 | 17  | 3,98 |
| -     | SMD_2177 | 65  | 2,92 | 30  | 4,18 |
| -     | SMD_2187 | 23  | 2,88 | 50  | 3,00 |
| -     | SMD_2193 | 25  | 2,79 | 27  | 3,24 |
| -     | SMD_2220 | 88  | 2,18 | 19  | 1,70 |
| -     | SMD_2224 | 106 | 2,73 | 39  | 2,84 |
| -     | SMD_2225 | 82  | 2,09 | 19  | 2,72 |
| fruK  | SMD_2226 | 109 | 1,31 | 30  | 1,57 |
| fruA  | SMD_2227 | 194 | 2,04 | 49  | 2,61 |
| rpfN  | SMD_2228 | 229 | 1,93 | 51  | 2,51 |
| -     | SMD_2229 | 269 | 1,19 | 41  | 2,61 |
| -     | SMD_2230 | 39  | 2,40 | 20  | 2,94 |
| -     | SMD_2236 | 37  | 2,54 | 36  | 3,01 |
| -     | SMD_2253 | 39  | 3,20 | 24  | 2,86 |
| -     | SMD_2256 | 33  | 2,94 | 36  | 1,96 |
| metE  | SMD_2261 | 24  | 4,69 | 36  | 3,83 |
| -     | SMD_2271 | 33  | 2,86 | 65  | 3,16 |
| -     | SMD_2273 | 42  | 1,94 | 43  | 3,74 |
| -     | SMD_2293 | 81  | 4,35 | 111 | 4,17 |
| -     | SMD_2298 | 112 | 2,61 | 71  | 3,09 |
| -     | SMD_2299 | 75  | 2,73 | 83  | 2,29 |
| -     | SMD_2316 | 57  | 2,96 | 19  | 2,58 |
| -     | SMD_2318 | 39  | 3,40 | 29  | 4,33 |
| trbP  | SMD_2323 | 23  | 2,68 | 23  | 1,71 |
| -     | SMD_2338 | 52  | 2,62 | 49  | 2,28 |

|       |          |     |      |     |      |
|-------|----------|-----|------|-----|------|
| -     | SMD_2339 | 42  | 2,21 | 40  | 2,74 |
| -     | SMD_2340 | 54  | 2,08 | 50  | 2,12 |
| -     | SMD_2346 | 22  | 2,73 | 18  | 2,89 |
| -     | SMD_2350 | 18  | 1,65 | 39  | 3,86 |
| -     | SMD_2374 | 45  | 2,77 | 18  | 3,07 |
| -     | SMD_2375 | 29  | 2,93 | 30  | 2,81 |
| -     | SMD_2379 | 119 | 3,12 | 63  | 4,51 |
| proP  | SMD_2380 | 64  | 3,65 | 48  | 4,35 |
| -     | SMD_2390 | 26  | 3,74 | 26  | 3,16 |
| -     | SMD_2431 | 30  | 2,95 | 29  | 1,91 |
| modA  | SMD_2433 | 48  | 2,26 | 38  | 3,19 |
| fnr2  | SMD_2434 | 50  | 1,78 | 41  | 2,70 |
| moeA  | SMD_2439 | 73  | 2,52 | 63  | 2,61 |
| moaBC | SMD_2440 | 55  | 2,80 | 50  | 1,50 |
| moaA  | SMD_2441 | 27  | 3,08 | 23  | 1,67 |
| -     | SMD_2451 | 21  | 3,10 | 30  | 4,18 |
| -     | SMD_2454 | 26  | 3,64 | 28  | 2,46 |
| -     | SMD_2457 | 66  | 2,66 | 66  | 3,25 |
| -     | SMD_2459 | 23  | 2,11 | 29  | 2,94 |
| -     | SMD_2461 | 92  | 2,24 | 95  | 2,26 |
| sodA2 | SMD_2474 | 69  | 3,88 | 94  | 2,74 |
| -     | SMD_2475 | 300 | 3,11 | 293 | 3,41 |
| -     | SMD_2476 | 491 | 2,48 | 244 | 3,17 |
| -     | SMD_2477 | 99  | 2,95 | 79  | 3,34 |
| -     | SMD_2478 | 83  | 3,23 | 53  | 4,41 |
| -     | SMD_2479 | 45  | 2,57 | 39  | 2,01 |
| -     | SMD_2480 | 56  | 2,24 | 53  | 3,58 |
| -     | SMD_2481 | 63  | 2,48 | 36  | 2,55 |
| -     | SMD_2484 | 55  | 3,05 | 49  | 3,02 |
| -     | SMD_2488 | 32  | 3,33 | 26  | 2,26 |
| -     | SMD_2489 | 25  | 3,51 | 16  | 4,39 |
| -     | SMD_2491 | 29  | 3,30 | 25  | 3,23 |
| -     | SMD_2494 | 85  | 1,90 | 64  | 3,54 |
| -     | SMD_2495 | 94  | 2,91 | 149 | 2,90 |
| -     | SMD_2496 | 56  | 2,72 | 16  | 3,88 |

|       |          |     |      |     |       |
|-------|----------|-----|------|-----|-------|
| -     | SMD_2517 | 26  | 3,33 | 21  | 4,83  |
| -     | SMD_2518 | 30  | 4,64 | 20  | 6,11  |
| -     | SMD_2528 | 31  | 2,39 | 27  | 2,44  |
| -     | SMD_2530 | 31  | 2,35 | 22  | 3,27  |
| -     | SMD_2531 | 27  | 2,90 | 21  | 3,13  |
| cdh   | SMD_2539 | 58  | 3,59 | 50  | 1,92  |
| -     | SMD_2540 | 63  | 3,15 | 49  | 2,78  |
| -     | SMD_2541 | 357 | 2,64 | 366 | 2,84  |
| -     | SMD_2542 | 198 | 1,25 | 138 | 2,52  |
| dld   | SMD_2543 | 442 | 1,93 | 464 | 2,08  |
| lctD  | SMD_2544 | 372 | 1,91 | 376 | 2,23  |
| lctR  | SMD_2545 | 131 | 2,35 | 72  | 2,55  |
| lctP  | SMD_2546 | 61  | 3,84 | 34  | 4,65  |
| cgb   | SMD_2554 | 37  | 2,48 | 45  | 2,53  |
| -     | SMD_2560 | 32  | 5,54 | 19  | 11,09 |
| -     | SMD_2568 | 33  | 6,66 | 20  | 30,29 |
| -     | SMD_2569 | 93  | 4,44 | 56  | 6,08  |
| -     | SMD_2574 | 37  | 7,96 | 46  | 8,86  |
| -     | SMD_2575 | 32  | 3,84 | 44  | 2,41  |
| -     | SMD_2576 | 45  | 2,64 | 169 | 2,34  |
| adi   | SMD_2577 | 86  | 2,52 | 391 | 3,87  |
| -     | SMD_2592 | 44  | 2,57 | 32  | 1,54  |
| -     | SMD_2597 | 111 | 3,32 | 44  | 6,05  |
| tex   | SMD_2599 | 103 | 2,71 | 101 | 2,72  |
| -     | SMD_2600 | 129 | 3,07 | 115 | 2,95  |
| -     | SMD_2601 | 37  | 2,12 | 34  | 3,12  |
| -     | SMD_2606 | 52  | 2,54 | 57  | 2,48  |
| pssA2 | SMD_2607 | 27  | 3,31 | 23  | 2,30  |
| mutX  | SMD_2610 | 67  | 2,85 | 39  | 3,18  |
| pps   | SMD_2613 | 207 | 2,94 | 233 | 2,96  |
| -     | SMD_2616 | 25  | 4,22 | 27  | 3,24  |
| orn   | SMD_2617 | 52  | 3,33 | 51  | 3,33  |
| -     | SMD_2620 | 33  | 3,21 | 27  | 4,45  |
| -     | SMD_2621 | 107 | 2,70 | 112 | 2,99  |
| -     | SMD_2623 | 78  | 1,96 | 67  | 2,53  |

|       |          |     |      |      |      |
|-------|----------|-----|------|------|------|
| -     | SMD_2624 | 135 | 2,89 | 150  | 2,66 |
| -     | SMD_2626 | 112 | 2,58 | 86   | 2,47 |
| -     | SMD_2628 | 64  | 3,35 | 40   | 3,17 |
| trwl  | SMD_2630 | 416 | 1,68 | 480  | 1,95 |
| -     | SMD_2631 | 480 | 1,75 | 643  | 1,91 |
| virB4 | SMD_2632 | 540 | 1,87 | 642  | 1,89 |
| -     | SMD_2633 | 529 | 2,12 | 884  | 1,96 |
| -     | SMD_2634 | 988 | 2,90 | 1508 | 2,93 |
| -     | SMD_2635 | 340 | 2,21 | 382  | 2,25 |
| -     | SMD_2637 | 349 | 2,32 | 398  | 2,51 |
| virB9 | SMD_2638 | 314 | 2,27 | 313  | 2,72 |
| -     | SMD_2639 | 91  | 2,52 | 47   | 3,72 |
| -     | SMD_2640 | 91  | 2,94 | 42   | 3,68 |
| virD4 | SMD_2641 | 64  | 3,11 | 33   | 3,48 |
| -     | SMD_2645 | 37  | 3,10 | 29   | 5,77 |
| -     | SMD_2651 | 63  | 3,10 | 49   | 4,50 |
| -     | SMD_2652 | 52  | 3,40 | 52   | 5,04 |
| -     | SMD_2661 | 38  | 2,58 | 39   | 3,11 |
| -     | SMD_2663 | 171 | 2,56 | 103  | 2,84 |
| -     | SMD_2665 | 51  | 2,34 | 36   | 2,77 |
| -     | SMD_2671 | 34  | 2,63 | 27   | 2,92 |
| -     | SMD_2674 | 61  | 2,65 | 64   | 4,14 |
| serS  | SMD_2677 | 79  | 3,04 | 105  | 3,07 |
| -     | SMD_2678 | 25  | 1,70 | 17   | 3,69 |
| aroA  | SMD_2680 | 95  | 2,59 | 149  | 2,65 |
| pheA  | SMD_2681 | 129 | 2,63 | 141  | 2,85 |
| serC  | SMD_2682 | 89  | 3,17 | 77   | 3,57 |
| -     | SMD_2683 | 87  | 3,90 | 68   | 4,26 |
| -     | SMD_2684 | 49  | 3,38 | 90   | 2,23 |
| -     | SMD_2685 | 46  | 3,05 | 49   | 3,66 |
| -     | SMD_2686 | 37  | 4,76 | 25   | 5,32 |
| -     | SMD_2687 | 89  | 3,51 | 52   | 4,51 |
| -     | SMD_2688 | 18  | 2,78 | 27   | 4,49 |
| hutH  | SMD_2691 | 19  | 3,58 | 32   | 3,05 |
| -     | SMD_2695 | 51  | 4,63 | 32   | 6,66 |



|       |          |      |      |      |      |
|-------|----------|------|------|------|------|
| -     | SMD_2704 | 43   | 2,99 | 32   | 2,99 |
| -     | SMD_2709 | 83   | 1,35 | 41   | 3,48 |
| -     | SMD_2710 | 49   | 2,61 | 33   | 3,12 |
| -     | SMD_2713 | 66   | 2,56 | 97   | 2,68 |
| -     | SMD_2714 | 55   | 2,76 | 39   | 2,65 |
| gyrA  | SMD_2717 | 289  | 2,67 | 302  | 2,97 |
| mtnA  | SMD_2718 | 79   | 2,70 | 66   | 3,96 |
| -     | SMD_2719 | 88   | 3,06 | 85   | 3,05 |
| -     | SMD_2723 | 109  | 2,82 | 88   | 3,97 |
| smc   | SMD_2725 | 73   | 2,51 | 70   | 2,98 |
| rplI  | SMD_2726 | 1549 | 2,96 | 3022 | 2,65 |
| rpsR  | SMD_2727 | 1578 | 2,54 | 2414 | 2,49 |
| rpsF  | SMD_2728 | 2735 | 2,46 | 4630 | 2,30 |
| -     | SMD_2729 | 64   | 3,37 | 32   | 4,76 |
| sufA  | SMD_2730 | 52   | 2,97 | 46   | 3,38 |
| asnC  | SMD_2731 | 151  | 2,87 | 169  | 2,88 |
| -     | SMD_2733 | 102  | 3,27 | 143  | 3,26 |
| pai2  | SMD_2734 | 61   | 3,37 | 96   | 2,18 |
| -     | SMD_2735 | 167  | 2,17 | 195  | 2,82 |
| nbaC  | SMD_2736 | 108  | 2,06 | 146  | 2,24 |
| -     | SMD_2737 | 46   | 2,64 | 30   | 2,83 |
| sbcB  | SMD_2739 | 85   | 2,31 | 99   | 2,50 |
| -     | SMD_2740 | 133  | 2,45 | 147  | 2,11 |
| -     | SMD_2741 | 62   | 3,09 | 72   | 2,48 |
| -     | SMD_2743 | 63   | 2,90 | 49   | 3,33 |
| -     | SMD_2744 | 63   | 2,76 | 62   | 2,78 |
| -     | SMD_2745 | 657  | 2,20 | 1141 | 2,14 |
| -     | SMD_2746 | 184  | 1,99 | 121  | 1,94 |
| -     | SMD_2747 | 34   | 2,40 | 34   | 4,20 |
| smeG  | SMD_2748 | 212  | 2,39 | 559  | 2,19 |
| acrD  | SMD_2749 | 325  | 2,19 | 882  | 1,87 |
| -     | SMD_2750 | 111  | 1,36 | 43   | 2,38 |
| bcd   | SMD_2751 | 161  | 2,15 | 183  | 2,72 |
| metH2 | SMD_2753 | 55   | 3,25 | 58   | 3,05 |
| metH  | SMD_2754 | 49   | 2,42 | 63   | 2,55 |

|       |          |      |      |      |      |
|-------|----------|------|------|------|------|
| -     | SMD_2755 | 104  | 1,89 | 57   | 2,84 |
| -     | SMD_2758 | 442  | 1,92 | 363  | 2,75 |
| -     | SMD_2759 | 469  | 2,26 | 574  | 2,40 |
| -     | SMD_2760 | 254  | 2,92 | 449  | 1,99 |
| -     | SMD_2765 | 60   | 2,37 | 55   | 2,58 |
| -     | SMD_2766 | 68   | 2,31 | 76   | 2,26 |
| -     | SMD_2767 | 63   | 2,02 | 76   | 2,94 |
| -     | SMD_2768 | 147  | 2,53 | 151  | 2,93 |
| fumC  | SMD_2769 | 40   | 3,05 | 45   | 3,12 |
| purB  | SMD_2770 | 62   | 3,24 | 73   | 3,13 |
| -     | SMD_2772 | 62   | 2,59 | 100  | 2,49 |
| -     | SMD_2773 | 50   | 2,27 | 76   | 2,87 |
| sucA  | SMD_2774 | 598  | 2,38 | 842  | 2,31 |
| sucB  | SMD_2775 | 1170 | 2,21 | 2224 | 2,02 |
| odhL  | SMD_2776 | 1369 | 1,99 | 2388 | 1,90 |
| -     | SMD_2783 | 38   | 2,41 | 53   | 2,97 |
| -     | SMD_2787 | 71   | 3,41 | 52   | 3,69 |
| -     | SMD_2788 | 114  | 3,46 | 163  | 3,38 |
| -     | SMD_2789 | 114  | 3,68 | 90   | 4,12 |
| yjjV  | SMD_2790 | 202  | 3,34 | 198  | 3,61 |
| -     | SMD_2791 | 86   | 3,10 | 84   | 3,76 |
| -     | SMD_2793 | 282  | 2,64 | 377  | 2,68 |
| cspA2 | SMD_2794 | 291  | 2,57 | 399  | 2,50 |
| -     | SMD_2796 | 65   | 2,96 | 71   | 2,64 |
| gst4  | SMD_2798 | 36   | 4,24 | 72   | 3,06 |
| -     | SMD_2800 | 269  | 2,57 | 362  | 2,44 |
| fpr   | SMD_2804 | 139  | 3,01 | 185  | 2,63 |
| -     | SMD_2806 | 385  | 2,84 | 936  | 2,50 |
| -     | SMD_2808 | 120  | 2,55 | 121  | 3,08 |
| -     | SMD_2809 | 79   | 2,86 | 48   | 3,24 |
| -     | SMD_2810 | 415  | 2,44 | 243  | 2,74 |
| -     | SMD_2812 | 145  | 2,45 | 171  | 2,63 |
| sodA  | SMD_2814 | 1219 | 2,98 | 1283 | 3,06 |
| -     | SMD_2815 | 49   | 2,60 | 26   | 3,44 |
| -     | SMD_2817 | 56   | 3,29 | 56   | 4,22 |

|      |          |     |      |     |      |
|------|----------|-----|------|-----|------|
| -    | SMD_2818 | 138 | 3,55 | 113 | 4,83 |
| -    | SMD_2820 | 113 | 2,26 | 107 | 3,54 |
| zupT | SMD_2821 | 144 | 2,65 | 112 | 2,82 |
| rluC | SMD_2822 | 96  | 2,45 | 74  | 3,00 |
| rnE  | SMD_2823 | 244 | 2,48 | 279 | 2,71 |
| -    | SMD_2825 | 54  | 2,65 | 67  | 2,79 |
| -    | SMD_2829 | 53  | 2,52 | 52  | 2,71 |
| -    | SMD_2830 | 472 | 2,20 | 712 | 2,24 |
| -    | SMD_2831 | 120 | 2,83 | 134 | 2,78 |
| -    | SMD_2832 | 99  | 2,25 | 127 | 1,39 |
| yciL | SMD_2833 | 653 | 2,14 | 890 | 2,35 |
| scpA | SMD_2834 | 22  | 3,38 | 18  | 4,81 |
| scpB | SMD_2835 | 96  | 3,17 | 137 | 3,14 |
| rluB | SMD_2836 | 211 | 2,52 | 355 | 2,48 |
| -    | SMD_2840 | 103 | 2,78 | 161 | 2,66 |
| -    | SMD_2841 | 61  | 2,65 | 103 | 2,51 |
| ccmA | SMD_2842 | 26  | 2,97 | 23  | 4,38 |
| ccmB | SMD_2843 | 32  | 3,38 | 31  | 3,82 |
| ccmE | SMD_2846 | 106 | 2,69 | 116 | 2,69 |
| ccmF | SMD_2847 | 96  | 2,49 | 97  | 2,63 |
| ccmG | SMD_2848 | 245 | 2,19 | 309 | 2,49 |
| metX | SMD_2851 | 94  | 3,27 | 102 | 3,43 |
| cydC | SMD_2853 | 80  | 2,16 | 77  | 2,35 |
| cydD | SMD_2854 | 19  | 3,17 | 19  | 3,36 |
| cydA | SMD_2855 | 181 | 2,61 | 379 | 2,20 |
| cydB | SMD_2856 | 216 | 1,91 | 430 | 1,88 |
| -    | SMD_2860 | 37  | 3,20 | 25  | 3,72 |
| hmsS | SMD_2864 | 135 | 2,24 | 83  | 2,08 |
| proA | SMD_2865 | 49  | 2,72 | 75  | 2,34 |
| proB | SMD_2866 | 44  | 1,92 | 94  | 2,23 |
| -    | SMD_2867 | 317 | 1,83 | 414 | 1,85 |
| argH | SMD_2868 | 101 | 2,04 | 114 | 2,40 |
| argC | SMD_2869 | 139 | 2,16 | 186 | 2,40 |
| -    | SMD_2871 | 104 | 2,06 | 117 | 2,84 |
| argE | SMD_2872 | 93  | 2,68 | 183 | 2,60 |

|      |          |      |      |      |      |
|------|----------|------|------|------|------|
| argG | SMD_2873 | 210  | 2,25 | 372  | 2,26 |
| -    | SMD_2876 | 88   | 4,42 | 47   | 8,79 |
| cysS | SMD_2877 | 86   | 3,21 | 85   | 2,97 |
| -    | SMD_2879 | 43   | 2,22 | 70   | 2,72 |
| -    | SMD_2880 | 295  | 2,61 | 322  | 3,24 |
| pyrC | SMD_2882 | 123  | 2,61 | 104  | 2,77 |
| -    | SMD_2884 | 222  | 2,11 | 200  | 2,57 |
| ubiG | SMD_2886 | 104  | 2,43 | 116  | 1,89 |
| -    | SMD_2887 | 151  | 2,46 | 146  | 2,24 |
| efp  | SMD_2888 | 439  | 2,61 | 722  | 2,28 |
| -    | SMD_2889 | 112  | 3,10 | 55   | 4,13 |
| -    | SMD_2890 | 55   | 3,21 | 39   | 3,57 |
| -    | SMD_2891 | 46   | 3,30 | 36   | 4,71 |
| trmJ | SMD_2892 | 38   | 3,35 | 41   | 3,83 |
| suhB | SMD_2893 | 58   | 3,63 | 26   | 4,17 |
| htpX | SMD_2894 | 86   | 3,61 | 73   | 4,06 |
| -    | SMD_2897 | 70   | 2,78 | 71   | 3,54 |
| -    | SMD_2898 | 96   | 2,48 | 101  | 2,75 |
| -    | SMD_2899 | 131  | 2,26 | 131  | 2,86 |
| mutL | SMD_2900 | 61   | 3,94 | 61   | 4,40 |
| amiC | SMD_2901 | 113  | 3,93 | 110  | 4,47 |
| ex7L | SMD_2905 | 23   | 2,79 | 30   | 3,03 |
| -    | SMD_2907 | 35   | 3,07 | 21   | 4,67 |
| -    | SMD_2909 | 98   | 2,83 | 125  | 3,02 |
| -    | SMD_2920 | 60   | 2,68 | 75   | 2,52 |
| dxs  | SMD_2922 | 129  | 2,76 | 130  | 3,64 |
| -    | SMD_2923 | 221  | 2,78 | 90   | 4,00 |
| -    | SMD_2929 | 23   | 1,54 | 30   | 2,66 |
| -    | SMD_2933 | 18   | 5,09 | 38   | 5,95 |
| -    | SMD_2935 | 31   | 2,75 | 21   | 4,97 |
| himA | SMD_2946 | 857  | 2,34 | 809  | 2,76 |
| pheT | SMD_2947 | 190  | 2,51 | 255  | 2,69 |
| pheS | SMD_2948 | 198  | 2,93 | 186  | 3,60 |
| rplT | SMD_2949 | 1407 | 2,29 | 1861 | 2,45 |
| RL35 | SMD_2950 | 2246 | 2,45 | 3648 | 2,43 |

|       |          |      |      |      |      |
|-------|----------|------|------|------|------|
| infC  | SMD_2951 | 593  | 1,86 | 805  | 2,39 |
| thrS  | SMD_2952 | 293  | 2,66 | 413  | 2,79 |
| chiA2 | SMD_2957 | 32   | 2,43 | 36   | 2,97 |
| pnp   | SMD_2958 | 1198 | 2,22 | 2480 | 2,22 |
| rpsO  | SMD_2959 | 700  | 2,45 | 983  | 2,92 |
| truB  | SMD_2960 | 216  | 2,38 | 269  | 2,01 |
| rbfA  | SMD_2961 | 389  | 2,23 | 520  | 2,39 |
| infB  | SMD_2962 | 798  | 2,16 | 1141 | 2,23 |
| nusA  | SMD_2963 | 269  | 2,81 | 290  | 2,92 |
| rimP  | SMD_2964 | 146  | 2,42 | 82   | 3,92 |
| nuoN  | SMD_2967 | 657  | 1,98 | 1079 | 1,91 |
| nuoM  | SMD_2968 | 923  | 1,91 | 1370 | 1,85 |
| nuoL  | SMD_2969 | 1153 | 1,80 | 1864 | 1,92 |
| nuoK  | SMD_2970 | 710  | 1,92 | 1538 | 2,09 |
| nuoJ  | SMD_2971 | 1371 | 2,12 | 2562 | 2,08 |
| nuoI  | SMD_2972 | 555  | 1,99 | 1012 | 1,66 |
| nuoH  | SMD_2973 | 1133 | 2,06 | 1524 | 2,00 |
| nuoG  | SMD_2974 | 1249 | 2,02 | 2006 | 2,05 |
| nuoF  | SMD_2975 | 1981 | 2,01 | 2887 | 1,91 |
| nuoE  | SMD_2976 | 2270 | 1,97 | 3241 | 1,83 |
| nuoD  | SMD_2977 | 1044 | 2,19 | 1323 | 2,29 |
| nuoC  | SMD_2978 | 449  | 2,59 | 556  | 2,56 |
| nuoB  | SMD_2979 | 417  | 2,73 | 385  | 2,95 |
| nuoA  | SMD_2980 | 176  | 3,35 | 120  | 3,58 |
| secG  | SMD_2982 | 163  | 3,32 | 181  | 4,02 |
| tpiA  | SMD_2983 | 245  | 3,14 | 301  | 3,01 |
| -     | SMD_2984 | 199  | 2,92 | 348  | 2,37 |
| -     | SMD_2985 | 43   | 3,35 | 36   | 3,80 |
| -     | SMD_2986 | 142  | 2,30 | 127  | 2,70 |
| -     | SMD_2987 | 286  | 2,57 | 211  | 2,18 |
| glmM  | SMD_2988 | 457  | 2,46 | 584  | 2,66 |
| accD  | SMD_2989 | 324  | 2,43 | 355  | 2,65 |
| trpA  | SMD_2990 | 54   | 2,15 | 56   | 2,78 |
| -     | SMD_2991 | 47   | 1,51 | 49   | 3,17 |
| trpB  | SMD_2992 | 35   | 3,53 | 32   | 3,39 |

|      |          |      |      |      |      |
|------|----------|------|------|------|------|
| -    | SMD_2993 | 52   | 2,41 | 38   | 2,85 |
| -    | SMD_2994 | 90   | 2,41 | 98   | 2,61 |
| -    | SMD_2995 | 29   | 2,22 | 40   | 2,59 |
| -    | SMD_2996 | 86   | 2,36 | 85   | 2,60 |
| -    | SMD_2997 | 146  | 2,37 | 179  | 2,37 |
| -    | SMD_2998 | 71   | 2,13 | 77   | 2,46 |
| truA | SMD_3000 | 289  | 2,29 | 325  | 2,40 |
| -    | SMD_3001 | 278  | 2,52 | 365  | 2,45 |
| fimV | SMD_3002 | 214  | 2,70 | 223  | 2,59 |
| asd  | SMD_3003 | 255  | 2,80 | 363  | 2,46 |
| -    | SMD_3004 | 157  | 2,69 | 149  | 2,72 |
| aroC | SMD_3005 | 200  | 2,58 | 204  | 3,18 |
| yfcB | SMD_3006 | 88   | 3,03 | 98   | 2,98 |
| -    | SMD_3007 | 40   | 3,12 | 26   | 3,97 |
| psd  | SMD_3008 | 82   | 2,48 | 66   | 2,81 |
| -    | SMD_3009 | 315  | 2,11 | 289  | 2,39 |
| mltD | SMD_3010 | 85   | 2,53 | 71   | 2,80 |
| -    | SMD_3011 | 52   | 2,98 | 38   | 3,76 |
| -    | SMD_3014 | 128  | 3,10 | 95   | 3,48 |
| -    | SMD_3015 | 16   | 3,21 | 35   | 2,91 |
| -    | SMD_3016 | 20   | 1,61 | 18   | 3,92 |
| -    | SMD_3018 | 26   | 3,83 | 50   | 3,03 |
| -    | SMD_3019 | 36   | 3,22 | 55   | 3,57 |
| -    | SMD_3020 | 41   | 4,53 | 42   | 5,54 |
| -    | SMD_3021 | 18   | 6,54 | 35   | 4,99 |
| dcd  | SMD_3025 | 152  | 3,05 | 180  | 3,16 |
| -    | SMD_3027 | 1335 | 3,06 | 2769 | 2,73 |
| -    | SMD_3028 | 38   | 2,37 | 33   | 3,27 |
| -    | SMD_3030 | 227  | 2,18 | 342  | 2,05 |
| -    | SMD_3031 | 254  | 2,37 | 320  | 2,39 |
| -    | SMD_3032 | 51   | 2,83 | 45   | 1,62 |
| -    | SMD_3033 | 84   | 3,05 | 52   | 4,33 |
| -    | SMD_3034 | 64   | 3,18 | 36   | 4,51 |
| -    | SMD_3039 | 43   | 2,69 | 36   | 3,36 |
| slyD | SMD_3040 | 501  | 2,44 | 630  | 2,43 |

|      |          |     |      |     |      |
|------|----------|-----|------|-----|------|
| -    | SMD_3042 | 35  | 3,75 | 16  | 5,21 |
| -    | SMD_3043 | 19  | 3,32 | 26  | 4,22 |
| phoA | SMD_3044 | 103 | 2,31 | 128 | 2,51 |
| -    | SMD_3045 | 27  | 1,60 | 48  | 1,70 |
| xseB | SMD_3047 | 168 | 2,98 | 98  | 4,38 |
| ispA | SMD_3048 | 126 | 2,98 | 97  | 3,67 |
| -    | SMD_3049 | 239 | 2,80 | 196 | 3,36 |
| -    | SMD_3050 | 121 | 2,30 | 50  | 1,57 |
| -    | SMD_3051 | 468 | 2,29 | 165 | 2,42 |
| tldD | SMD_3052 | 169 | 2,53 | 78  | 3,62 |
| rnG  | SMD_3054 | 93  | 2,66 | 57  | 3,63 |
| maf  | SMD_3055 | 46  | 2,81 | 48  | 4,15 |
| -    | SMD_3056 | 74  | 3,71 | 147 | 4,39 |
| -    | SMD_3057 | 40  | 2,99 | 16  | 4,13 |
| -    | SMD_3058 | 70  | 3,34 | 46  | 4,24 |
| rlmH | SMD_3061 | 112 | 3,47 | 172 | 2,82 |
| nadD | SMD_3063 | 122 | 1,80 | 122 | 2,57 |
| holA | SMD_3064 | 148 | 2,99 | 165 | 3,22 |
| -    | SMD_3065 | 235 | 2,23 | 204 | 2,94 |
| leuS | SMD_3066 | 257 | 2,86 | 312 | 3,08 |
| -    | SMD_3069 | 49  | 4,70 | 57  | 4,94 |
| -    | SMD_3073 | 35  | 3,41 | 33  | 2,81 |
| -    | SMD_3074 | 17  | 3,02 | 24  | 4,25 |
| metG | SMD_3080 | 108 | 2,47 | 165 | 2,83 |
| -    | SMD_3081 | 249 | 3,02 | 421 | 2,66 |
| rnfB | SMD_3082 | 150 | 2,72 | 126 | 2,48 |
| -    | SMD_3083 | 382 | 2,84 | 567 | 3,07 |
| -    | SMD_3088 | 146 | 2,97 | 160 | 3,33 |
| phnA | SMD_3089 | 222 | 2,64 | 657 | 2,51 |
| yegD | SMD_3090 | 29  | 3,40 | 21  | 5,00 |
| -    | SMD_3091 | 92  | 3,54 | 76  | 4,82 |
| -    | SMD_3092 | 74  | 3,68 | 79  | 5,83 |
| -    | SMD_3093 | 78  | 4,69 | 93  | 5,55 |
| -    | SMD_3097 | 115 | 2,92 | 80  | 3,57 |
| -    | SMD_3098 | 102 | 1,36 | 27  | 2,36 |

|       |          |      |      |      |      |
|-------|----------|------|------|------|------|
| -     | SMD_3099 | 46   | 3,40 | 42   | 3,45 |
| rluF2 | SMD_3101 | 49   | 3,45 | 43   | 3,62 |
| -     | SMD_3102 | 36   | 2,99 | 20   | 5,57 |
| vdh   | SMD_3104 | 81   | 3,24 | 79   | 2,75 |
| sphB  | SMD_3105 | 37   | 2,78 | 36   | 2,87 |
| -     | SMD_3106 | 67   | 2,94 | 124  | 2,51 |
| -     | SMD_3107 | 3735 | 4,25 | 8058 | 3,60 |
| -     | SMD_3108 | 52   | 2,39 | 72   | 3,36 |
| -     | SMD_3114 | 90   | 1,39 | 46   | 2,53 |
| cspD  | SMD_3116 | 806  | 2,34 | 1751 | 1,97 |
| mtaP  | SMD_3117 | 152  | 2,88 | 294  | 2,63 |
| hpt   | SMD_3118 | 195  | 2,40 | 356  | 2,51 |
| -     | SMD_3120 | 100  | 2,50 | 80   | 3,13 |
| -     | SMD_3121 | 28   | 2,97 | 29   | 3,45 |
| rumA  | SMD_3122 | 76   | 2,91 | 68   | 3,47 |
| -     | SMD_3123 | 168  | 3,27 | 139  | 3,98 |
| recO  | SMD_3124 | 114  | 2,43 | 108  | 2,90 |
| era   | SMD_3125 | 605  | 2,41 | 749  | 2,32 |
| rnc   | SMD_3126 | 321  | 2,24 | 303  | 2,13 |
| -     | SMD_3127 | 379  | 2,66 | 338  | 2,58 |
| lepB  | SMD_3128 | 260  | 2,07 | 264  | 2,61 |
| lepA  | SMD_3129 | 153  | 2,92 | 126  | 2,86 |
| -     | SMD_3130 | 265  | 2,68 | 505  | 2,57 |
| -     | SMD_3133 | 33   | 2,96 | 31   | 3,51 |
| aqpZ  | SMD_3135 | 141  | 3,18 | 131  | 3,90 |
| -     | SMD_3137 | 62   | 2,74 | 32   | 4,78 |
| cstA  | SMD_3138 | 68   | 2,94 | 46   | 3,30 |
| -     | SMD_3140 | 65   | 2,83 | 65   | 3,43 |
| -     | SMD_3141 | 143  | 2,42 | 58   | 3,22 |
| -     | SMD_3143 | 47   | 3,60 | 19   | 3,80 |
| -     | SMD_3144 | 50   | 2,86 | 67   | 3,26 |
| -     | SMD_3145 | 25   | 3,17 | 19   | 2,10 |
| -     | SMD_3146 | 47   | 2,60 | 36   | 3,35 |
| -     | SMD_3147 | 231  | 2,36 | 239  | 2,64 |
| gcvP  | SMD_3153 | 110  | 2,73 | 190  | 2,47 |



|      |          |     |      |     |      |
|------|----------|-----|------|-----|------|
| -    | SMD_3155 | 51  | 3,13 | 33  | 3,61 |
| -    | SMD_3161 | 88  | 3,05 | 97  | 3,31 |
| purA | SMD_3164 | 122 | 3,36 | 107 | 3,56 |
| -    | SMD_3165 | 268 | 3,03 | 256 | 2,93 |
| hflC | SMD_3167 | 193 | 2,55 | 230 | 2,89 |
| hflK | SMD_3168 | 183 | 3,06 | 189 | 3,24 |
| pilH | SMD_3170 | 224 | 2,65 | 249 | 2,62 |
| cbpA | SMD_3171 | 166 | 2,35 | 206 | 2,77 |
| bfr  | SMD_3173 | 45  | 2,97 | 55  | 1,84 |
| pbpC | SMD_3174 | 38  | 2,13 | 35  | 2,51 |
| -    | SMD_3175 | 71  | 2,80 | 53  | 3,15 |
| prpD | SMD_3176 | 64  | 3,32 | 52  | 3,30 |
| -    | SMD_3177 | 97  | 2,36 | 91  | 3,00 |
| -    | SMD_3178 | 68  | 1,65 | 104 | 2,41 |
| acnA | SMD_3180 | 164 | 2,13 | 188 | 2,26 |
| prpC | SMD_3181 | 452 | 2,62 | 623 | 2,60 |
| prpB | SMD_3182 | 71  | 2,47 | 99  | 1,88 |
| -    | SMD_3184 | 77  | 2,69 | 39  | 3,29 |
| aroB | SMD_3189 | 57  | 2,81 | 42  | 3,23 |
| hemE | SMD_3191 | 81  | 3,20 | 59  | 3,56 |
| -    | SMD_3192 | 47  | 2,08 | 24  | 4,13 |
| -    | SMD_3193 | 67  | 2,79 | 70  | 2,93 |
| -    | SMD_3194 | 17  | 2,99 | 21  | 3,54 |
| -    | SMD_3197 | 54  | 2,30 | 32  | 4,30 |
| -    | SMD_3200 | 27  | 2,93 | 24  | 3,82 |
| prfC | SMD_3205 | 123 | 2,71 | 140 | 3,16 |
| -    | SMD_3208 | 114 | 2,67 | 118 | 2,84 |
| gtrB | SMD_3209 | 124 | 3,37 | 107 | 3,31 |
| hsIO | SMD_3211 | 57  | 2,18 | 66  | 3,83 |
| -    | SMD_3212 | 37  | 4,21 | 38  | 5,44 |
| -    | SMD_3213 | 63  | 4,04 | 59  | 4,14 |
| -    | SMD_3214 | 60  | 1,95 | 53  | 2,56 |
| -    | SMD_3220 | 78  | 3,44 | 56  | 4,13 |
| -    | SMD_3223 | 361 | 2,60 | 453 | 2,91 |
| gcvH | SMD_3224 | 444 | 2,44 | 750 | 2,32 |

|       |          |     |      |     |      |
|-------|----------|-----|------|-----|------|
| gcvT  | SMD_3225 | 161 | 2,47 | 212 | 2,70 |
| -     | SMD_3228 | 107 | 2,24 | 85  | 2,96 |
| cysQ  | SMD_3229 | 106 | 2,82 | 94  | 3,31 |
| nudE  | SMD_3230 | 105 | 2,32 | 80  | 3,10 |
| bioA  | SMD_3231 | 43  | 2,88 | 45  | 2,74 |
| rsmE  | SMD_3232 | 101 | 2,57 | 112 | 2,76 |
| -     | SMD_3235 | 156 | 2,26 | 130 | 2,84 |
| -     | SMD_3236 | 77  | 2,33 | 77  | 2,69 |
| frzE  | SMD_3237 | 108 | 3,63 | 101 | 4,13 |
| gshB  | SMD_3242 | 34  | 3,80 | 34  | 4,67 |
| -     | SMD_3243 | 119 | 3,01 | 85  | 3,48 |
| -     | SMD_3244 | 47  | 3,18 | 52  | 3,33 |
| -     | SMD_3247 | 182 | 2,37 | 132 | 3,22 |
| mrcB  | SMD_3248 | 71  | 2,89 | 69  | 3,12 |
| -     | SMD_3249 | 39  | 3,34 | 56  | 3,21 |
| -     | SMD_3250 | 79  | 2,74 | 67  | 2,99 |
| relA  | SMD_3251 | 66  | 3,03 | 68  | 2,96 |
| -     | SMD_3252 | 227 | 2,75 | 195 | 3,07 |
| hrpA  | SMD_3253 | 93  | 2,87 | 84  | 3,22 |
| -     | SMD_3254 | 386 | 3,59 | 709 | 3,98 |
| recQ  | SMD_3255 | 44  | 3,34 | 33  | 4,56 |
| copB2 | SMD_3258 | 16  | 3,44 | 21  | 4,22 |
| -     | SMD_3262 | 72  | 3,77 | 89  | 4,99 |
| -     | SMD_3264 | 50  | 4,46 | 90  | 4,29 |
| -     | SMD_3265 | 81  | 4,11 | 108 | 4,65 |
| -     | SMD_3266 | 42  | 7,15 | 104 | 4,97 |
| -     | SMD_3267 | 35  | 6,94 | 67  | 8,67 |
| Q     | SMD_3270 | 117 | 2,86 | 69  | 4,03 |
| I     | SMD_3284 | 17  | 3,37 | 16  | 5,46 |
| D     | SMD_3295 | 115 | 2,41 | 89  | 3,28 |
| -     | SMD_3303 | 35  | 2,92 | 35  | 2,88 |
| -     | SMD_3305 | 90  | 3,83 | 86  | 3,74 |
| -     | SMD_3306 | 109 | 2,61 | 135 | 3,41 |
| -     | SMD_3307 | 109 | 2,53 | 131 | 3,05 |
| -     | SMD_3308 | 172 | 3,02 | 192 | 3,09 |

|      |          |      |      |      |      |
|------|----------|------|------|------|------|
| -    | SMD_3309 | 1265 | 2,14 | 1850 | 2,40 |
| tolB | SMD_3310 | 272  | 2,36 | 484  | 2,53 |
| tolA | SMD_3311 | 355  | 2,49 | 434  | 2,52 |
| tolR | SMD_3312 | 166  | 2,46 | 239  | 2,83 |
| tolQ | SMD_3313 | 138  | 2,91 | 187  | 2,77 |
| kup  | SMD_3316 | 101  | 2,47 | 113  | 2,65 |
| ruvC | SMD_3318 | 161  | 2,68 | 176  | 2,39 |
| -    | SMD_3319 | 520  | 2,51 | 488  | 2,69 |
| -    | SMD_3320 | 122  | 3,15 | 127  | 2,58 |
| -    | SMD_3321 | 254  | 2,23 | 268  | 2,61 |
| aspS | SMD_3323 | 162  | 2,89 | 202  | 3,15 |
| -    | SMD_3325 | 26   | 3,16 | 39   | 1,60 |
| -    | SMD_3326 | 23   | 3,79 | 31   | 3,58 |
| ampR | SMD_3328 | 68   | 2,50 | 66   | 2,39 |
| -    | SMD_3329 | 99   | 3,13 | 72   | 4,01 |
| -    | SMD_3331 | 77   | 3,44 | 52   | 3,92 |
| -    | SMD_3332 | 28   | 3,08 | 22   | 3,51 |
| -    | SMD_3334 | 237  | 2,08 | 78   | 3,00 |
| -    | SMD_3335 | 311  | 2,68 | 160  | 3,13 |
| clpB | SMD_3336 | 217  | 2,23 | 101  | 3,13 |
| -    | SMD_3338 | 36   | 3,01 | 30   | 3,92 |
| -    | SMD_3339 | 17   | 3,99 | 21   | 3,19 |
| -    | SMD_3341 | 31   | 2,74 | 38   | 3,04 |
| -    | SMD_3342 | 45   | 2,86 | 45   | 2,15 |
| -    | SMD_3343 | 21   | 3,26 | 32   | 3,42 |
| otsA | SMD_3346 | 72   | 2,87 | 45   | 3,46 |
| -    | SMD_3349 | 63   | 2,71 | 104  | 2,73 |
| rluD | SMD_3350 | 165  | 2,52 | 208  | 2,50 |
| -    | SMD_3352 | 68   | 3,23 | 61   | 3,00 |
| nadE | SMD_3353 | 93   | 2,85 | 91   | 3,02 |
| sucD | SMD_3354 | 2571 | 1,94 | 4023 | 1,94 |
| sucC | SMD_3355 | 2170 | 1,95 | 3694 | 1,92 |
| hydG | SMD_3357 | 74   | 3,13 | 66   | 3,73 |
| pilB | SMD_3358 | 76   | 3,09 | 50   | 4,01 |
| pilA | SMD_3359 | 159  | 2,53 | 108  | 3,04 |

|      |          |     |      |      |      |
|------|----------|-----|------|------|------|
| pilC | SMD_3360 | 68  | 2,88 | 34   | 3,17 |
| coaE | SMD_3362 | 117 | 2,77 | 72   | 4,14 |
| -    | SMD_3366 | 161 | 2,89 | 135  | 3,16 |
| -    | SMD_3367 | 77  | 2,82 | 60   | 3,46 |
| -    | SMD_3368 | 53  | 3,69 | 37   | 5,12 |
| -    | SMD_3369 | 147 | 2,72 | 71   | 3,69 |
| -    | SMD_3373 | 59  | 2,70 | 52   | 3,38 |
| -    | SMD_3374 | 49  | 3,49 | 47   | 3,35 |
| -    | SMD_3376 | 230 | 2,56 | 399  | 2,41 |
| thiG | SMD_3378 | 142 | 2,61 | 141  | 3,32 |
| trmB | SMD_3379 | 109 | 2,37 | 121  | 3,37 |
| -    | SMD_3380 | 48  | 2,89 | 34   | 3,92 |
| -    | SMD_3382 | 22  | 4,52 | 32   | 5,56 |
| -    | SMD_3383 | 71  | 3,16 | 85   | 3,36 |
| mscL | SMD_3384 | 187 | 2,45 | 219  | 2,96 |
| -    | SMD_3385 | 47  | 2,96 | 62   | 3,18 |
| -    | SMD_3387 | 32  | 2,76 | 45   | 2,54 |
| yfiF | SMD_3388 | 44  | 2,91 | 71   | 1,84 |
| -    | SMD_3389 | 55  | 2,59 | 44   | 3,29 |
| smeN | SMD_3391 | 47  | 2,33 | 38   | 3,13 |
| smeM | SMD_3392 | 22  | 3,16 | 23   | 2,66 |
| -    | SMD_3393 | 36  | 3,46 | 104  | 3,02 |
| -    | SMD_3399 | 468 | 2,46 | 518  | 2,51 |
| alf1 | SMD_3400 | 768 | 2,55 | 1302 | 2,44 |
| pykA | SMD_3401 | 94  | 3,12 | 94   | 3,14 |
| pgk  | SMD_3403 | 91  | 2,33 | 162  | 2,92 |
| -    | SMD_3404 | 105 | 2,61 | 129  | 2,71 |
| gap  | SMD_3406 | 240 | 2,52 | 351  | 2,96 |
| -    | SMD_3407 | 354 | 3,75 | 1167 | 2,34 |
| -    | SMD_3408 | 82  | 3,35 | 103  | 3,30 |
| -    | SMD_3409 | 128 | 2,68 | 103  | 3,31 |
| -    | SMD_3413 | 16  | 6,38 | 27   | 6,42 |
| -    | SMD_3414 | 27  | 6,36 | 46   | 4,97 |
| -    | SMD_3415 | 84  | 3,69 | 48   | 5,75 |
| tkkA | SMD_3416 | 236 | 2,36 | 408  | 2,52 |

|      |          |      |      |      |      |
|------|----------|------|------|------|------|
| -    | SMD_3417 | 118  | 2,24 | 209  | 1,97 |
| -    | SMD_3418 | 71   | 2,62 | 73   | 2,84 |
| -    | SMD_3419 | 74   | 2,52 | 63   | 2,46 |
| batA | SMD_3420 | 66   | 2,56 | 69   | 2,80 |
| -    | SMD_3421 | 16   | 3,39 | 24   | 3,28 |
| -    | SMD_3423 | 56   | 3,77 | 53   | 4,16 |
| pilQ | SMD_3424 | 95   | 2,82 | 67   | 3,82 |
| pilP | SMD_3425 | 147  | 2,51 | 98   | 3,15 |
| pilO | SMD_3426 | 93   | 2,57 | 75   | 3,80 |
| mrcA | SMD_3429 | 48   | 3,08 | 38   | 3,81 |
| -    | SMD_3430 | 35   | 2,94 | 17   | 5,91 |
| gltA | SMD_3438 | 745  | 2,18 | 1262 | 2,10 |
| rpmE | SMD_3439 | 1235 | 2,68 | 1650 | 2,30 |
| iunH | SMD_3440 | 150  | 2,74 | 168  | 2,90 |
| recG | SMD_3441 | 119  | 2,51 | 151  | 2,57 |
| -    | SMD_3442 | 750  | 2,90 | 1287 | 2,69 |
| rpoZ | SMD_3444 | 180  | 3,58 | 241  | 4,22 |
| gmk  | SMD_3445 | 44   | 3,37 | 35   | 3,25 |
| fdnG | SMD_3446 | 49   | 5,60 | 60   | 5,59 |
| selA | SMD_3450 | 22   | 4,09 | 22   | 3,53 |
| selB | SMD_3451 | 22   | 2,85 | 23   | 4,04 |
| selD | SMD_3453 | 53   | 4,54 | 42   | 5,20 |
| rph  | SMD_3455 | 70   | 2,52 | 83   | 3,10 |
| -    | SMD_3457 | 122  | 2,89 | 160  | 2,89 |
| -    | SMD_3458 | 86   | 2,59 | 68   | 3,44 |
| -    | SMD_3460 | 68   | 3,13 | 47   | 3,55 |
| pepQ | SMD_3461 | 88   | 2,96 | 82   | 2,74 |
| -    | SMD_3463 | 135  | 2,57 | 177  | 2,39 |
| -    | SMD_3465 | 175  | 2,86 | 101  | 4,25 |
| -    | SMD_3468 | 62   | 3,30 | 34   | 3,98 |
| rpiA | SMD_3469 | 98   | 2,14 | 329  | 2,22 |
| -    | SMD_3470 | 108  | 1,92 | 309  | 2,18 |
| rubA | SMD_3472 | 127  | 2,96 | 117  | 3,17 |
| thiE | SMD_3473 | 48   | 2,72 | 63   | 2,63 |
| hemL | SMD_3474 | 117  | 2,90 | 161  | 2,92 |

|      |          |      |      |      |      |
|------|----------|------|------|------|------|
| -    | SMD_3475 | 204  | 1,08 | 187  | 2,74 |
| -    | SMD_3476 | 101  | 2,73 | 50   | 3,44 |
| astC | SMD_3477 | 120  | 2,84 | 109  | 3,13 |
| -    | SMD_3478 | 64   | 2,74 | 53   | 3,48 |
| -    | SMD_3479 | 97   | 3,27 | 117  | 3,08 |
| -    | SMD_3481 | 89   | 2,89 | 56   | 3,18 |
| -    | SMD_3482 | 282  | 2,51 | 298  | 2,78 |
| -    | SMD_3483 | 59   | 2,60 | 41   | 3,41 |
| -    | SMD_3485 | 53   | 2,50 | 54   | 3,18 |
| -    | SMD_3486 | 110  | 3,63 | 80   | 3,68 |
| -    | SMD_3487 | 169  | 2,25 | 108  | 3,34 |
| mpl  | SMD_3488 | 87   | 3,26 | 112  | 3,18 |
| adk  | SMD_3489 | 326  | 2,47 | 726  | 2,43 |
| pfk  | SMD_3490 | 42   | 3,77 | 60   | 3,17 |
| -    | SMD_3491 | 73   | 2,88 | 54   | 3,42 |
| -    | SMD_3492 | 67   | 3,71 | 31   | 3,80 |
| -    | SMD_3500 | 49   | 2,75 | 45   | 3,57 |
| ppa  | SMD_3505 | 773  | 2,49 | 1213 | 2,30 |
| -    | SMD_3506 | 44   | 2,51 | 47   | 3,41 |
| -    | SMD_3508 | 2020 | 3,00 | 3741 | 2,90 |
| -    | SMD_3509 | 123  | 2,66 | 107  | 3,27 |
| cadC | SMD_3510 | 120  | 3,28 | 86   | 4,03 |
| -    | SMD_3511 | 19   | 3,45 | 19   | 3,55 |
| -    | SMD_3514 | 17   | 3,65 | 17   | 3,94 |
| -    | SMD_3516 | 32   | 2,62 | 39   | 2,52 |
| leuA | SMD_3520 | 27   | 3,50 | 30   | 2,46 |
| leuC | SMD_3522 | 38   | 2,59 | 31   | 2,89 |
| leuD | SMD_3523 | 34   | 1,77 | 57   | 1,43 |
| leuB | SMD_3524 | 71   | 2,21 | 70   | 2,40 |
| -    | SMD_3525 | 54   | 2,64 | 51   | 3,61 |
| smeP | SMD_3527 | 43   | 2,85 | 46   | 3,14 |
| pcm2 | SMD_3530 | 490  | 2,59 | 606  | 3,15 |
| tolC | SMD_3531 | 314  | 2,63 | 501  | 2,73 |
| kdtA | SMD_3533 | 30   | 3,15 | 17   | 4,96 |
| htrB | SMD_3534 | 66   | 3,69 | 62   | 3,72 |

|       |          |     |      |     |      |
|-------|----------|-----|------|-----|------|
| -     | SMD_3536 | 82  | 3,56 | 68  | 4,09 |
| -     | SMD_3539 | 75  | 2,44 | 83  | 2,69 |
| -     | SMD_3540 | 148 | 3,02 | 121 | 2,80 |
| maeB  | SMD_3541 | 379 | 2,55 | 535 | 2,70 |
| oprP  | SMD_3543 | 42  | 3,10 | 42  | 3,87 |
| -     | SMD_3545 | 56  | 2,73 | 32  | 4,39 |
| tctD  | SMD_3548 | 27  | 2,98 | 40  | 3,65 |
| -     | SMD_3549 | 17  | 3,24 | 46  | 1,81 |
| fabG3 | SMD_3551 | 25  | 1,63 | 99  | 2,31 |
| engC  | SMD_3554 | 37  | 3,55 | 33  | 4,49 |
| -     | SMD_3555 | 65  | 3,62 | 52  | 4,09 |
| -     | SMD_3556 | 64  | 2,85 | 66  | 4,61 |
| -     | SMD_3558 | 66  | 2,95 | 22  | 5,28 |
| -     | SMD_3559 | 181 | 2,80 | 179 | 3,40 |
| -     | SMD_3560 | 126 | 2,76 | 123 | 3,68 |
| amn   | SMD_3561 | 152 | 3,19 | 105 | 4,05 |
| -     | SMD_3562 | 32  | 3,16 | 23  | 3,11 |
| -     | SMD_3564 | 43  | 1,84 | 48  | 2,95 |
| -     | SMD_3567 | 108 | 2,90 | 152 | 2,79 |
| -     | SMD_3575 | 71  | 2,94 | 141 | 2,65 |
| -     | SMD_3576 | 35  | 3,41 | 145 | 2,46 |
| adhC  | SMD_3577 | 163 | 3,10 | 352 | 2,60 |
| -     | SMD_3580 | 106 | 3,10 | 48  | 4,01 |
| -     | SMD_3581 | 139 | 2,79 | 70  | 3,44 |
| -     | SMD_3582 | 39  | 2,80 | 36  | 3,39 |
| -     | SMD_3586 | 61  | 2,45 | 52  | 2,06 |
| -     | SMD_3587 | 55  | 2,89 | 27  | 4,05 |
| -     | SMD_3590 | 39  | 3,22 | 26  | 4,48 |
| dsbA  | SMD_3593 | 51  | 3,50 | 106 | 2,53 |
| dsbA2 | SMD_3594 | 202 | 2,39 | 359 | 2,41 |
| -     | SMD_3595 | 195 | 2,80 | 265 | 2,34 |
| fhuE  | SMD_3599 | 67  | 2,85 | 39  | 3,72 |
| exbD5 | SMD_3602 | 53  | 2,96 | 43  | 5,18 |
| -     | SMD_3603 | 35  | 3,59 | 27  | 4,00 |
| -     | SMD_3611 | 80  | 2,67 | 50  | 2,58 |

|      |          |     |      |     |      |
|------|----------|-----|------|-----|------|
| nagA | SMD_3612 | 68  | 2,15 | 93  | 2,20 |
| -    | SMD_3613 | 62  | 2,62 | 88  | 2,20 |
| -    | SMD_3614 | 39  | 2,46 | 22  | 3,20 |
| -    | SMD_3617 | 54  | 2,89 | 43  | 3,37 |
| nahB | SMD_3618 | 38  | 3,45 | 33  | 3,42 |
| -    | SMD_3619 | 120 | 2,18 | 98  | 2,27 |
| -    | SMD_3620 | 50  | 3,28 | 41  | 3,83 |
| -    | SMD_3621 | 101 | 3,52 | 59  | 5,09 |
| -    | SMD_3622 | 53  | 3,64 | 59  | 4,06 |
| -    | SMD_3623 | 94  | 2,66 | 40  | 3,23 |
| -    | SMD_3624 | 299 | 3,08 | 275 | 3,01 |
| -    | SMD_3625 | 160 | 2,70 | 146 | 2,98 |
| -    | SMD_3626 | 197 | 2,87 | 236 | 3,03 |
| -    | SMD_3627 | 67  | 3,16 | 53  | 3,65 |
| -    | SMD_3630 | 138 | 2,62 | 210 | 2,74 |
| -    | SMD_3632 | 25  | 4,09 | 29  | 4,67 |
| -    | SMD_3633 | 155 | 3,07 | 139 | 3,39 |
| lipA | SMD_3634 | 259 | 2,89 | 150 | 3,33 |
| lipB | SMD_3635 | 163 | 3,20 | 162 | 3,91 |
| -    | SMD_3636 | 178 | 4,11 | 206 | 4,65 |
| dacC | SMD_3638 | 275 | 2,39 | 493 | 2,30 |
| rlpA | SMD_3639 | 102 | 3,33 | 68  | 4,57 |
| mltB | SMD_3640 | 119 | 3,42 | 97  | 4,36 |
| rodA | SMD_3641 | 55  | 2,77 | 16  | 3,54 |
| mrdB | SMD_3642 | 182 | 2,46 | 210 | 2,45 |
| mrDA | SMD_3643 | 117 | 2,14 | 81  | 2,61 |
| mreC | SMD_3645 | 81  | 2,71 | 82  | 3,11 |
| mreB | SMD_3646 | 97  | 3,21 | 82  | 3,40 |
| -    | SMD_3647 | 101 | 3,52 | 109 | 3,89 |
| -    | SMD_3648 | 207 | 2,64 | 200 | 3,10 |
| -    | SMD_3649 | 125 | 2,10 | 99  | 3,40 |
| -    | SMD_3650 | 203 | 2,45 | 282 | 2,69 |
| ubiE | SMD_3651 | 146 | 3,67 | 155 | 3,38 |
| codA | SMD_3652 | 61  | 3,19 | 111 | 2,83 |
| -    | SMD_3653 | 142 | 2,26 | 175 | 2,75 |



|      |          |      |      |      |      |
|------|----------|------|------|------|------|
| -    | SMD_3654 | 239  | 2,39 | 277  | 2,83 |
| -    | SMD_3655 | 637  | 2,43 | 684  | 3,07 |
| smeF | SMD_3656 | 319  | 2,39 | 662  | 2,48 |
| smeE | SMD_3657 | 489  | 2,74 | 1171 | 2,51 |
| smeD | SMD_3658 | 190  | 3,26 | 842  | 2,57 |
| -    | SMD_3660 | 84   | 2,83 | 44   | 3,59 |
| hslU | SMD_3661 | 236  | 2,53 | 170  | 3,12 |
| hslV | SMD_3662 | 135  | 2,68 | 128  | 2,96 |
| xerC | SMD_3663 | 107  | 2,72 | 97   | 2,38 |
| -    | SMD_3664 | 259  | 2,55 | 290  | 2,55 |
| dapF | SMD_3665 | 227  | 2,82 | 253  | 3,12 |
| ptrB | SMD_3668 | 73   | 2,73 | 59   | 3,23 |
| -    | SMD_3669 | 111  | 3,26 | 58   | 4,11 |
| -    | SMD_3670 | 151  | 2,51 | 268  | 2,39 |
| -    | SMD_3671 | 40   | 4,29 | 21   | 6,24 |
| -    | SMD_3672 | 88   | 2,80 | 62   | 3,91 |
| -    | SMD_3674 | 44   | 3,45 | 59   | 4,77 |
| -    | SMD_3675 | 47   | 3,55 | 34   | 5,69 |
| -    | SMD_3676 | 180  | 2,55 | 280  | 2,28 |
| -    | SMD_3677 | 127  | 2,58 | 148  | 2,03 |
| -    | SMD_3678 | 125  | 2,71 | 92   | 2,57 |
| prlC | SMD_3679 | 55   | 2,31 | 59   | 2,89 |
| -    | SMD_3681 | 70   | 2,84 | 56   | 3,42 |
| -    | SMD_3682 | 109  | 2,58 | 165  | 3,21 |
| -    | SMD_3684 | 133  | 2,47 | 112  | 3,54 |
| glmS | SMD_3685 | 120  | 2,74 | 195  | 2,58 |
| -    | SMD_3691 | 34   | 2,95 | 22   | 4,50 |
| -    | SMD_3692 | 109  | 2,95 | 79   | 3,44 |
| -    | SMD_3693 | 132  | 2,99 | 102  | 2,80 |
| glmU | SMD_3694 | 133  | 2,37 | 96   | 3,24 |
| -    | SMD_3695 | 210  | 2,36 | 141  | 2,42 |
| -    | SMD_3696 | 147  | 2,29 | 163  | 2,60 |
| atpC | SMD_3697 | 1787 | 1,87 | 2763 | 2,18 |
| atpD | SMD_3698 | 2635 | 2,09 | 5377 | 1,99 |
| atpG | SMD_3699 | 1103 | 2,05 | 2385 | 2,03 |

|      |          |      |      |      |       |
|------|----------|------|------|------|-------|
| atpA | SMD_3700 | 1482 | 2,29 | 3067 | 2,17  |
| atpH | SMD_3701 | 526  | 2,52 | 976  | 2,51  |
| atpF | SMD_3702 | 1314 | 2,62 | 2551 | 2,45  |
| atpE | SMD_3703 | 1240 | 2,63 | 3759 | 2,52  |
| atpB | SMD_3704 | 297  | 3,60 | 329  | 4,01  |
| -    | SMD_3705 | 190  | 4,66 | 172  | 6,13  |
| -    | SMD_3707 | 19   | 3,63 | 17   | 5,88  |
| lpdA | SMD_3708 | 416  | 2,40 | 550  | 2,54  |
| DLAT | SMD_3709 | 341  | 2,81 | 433  | 2,64  |
| -    | SMD_3711 | 1145 | 3,74 | 2082 | 3,79  |
| -    | SMD_3714 | 154  | 2,68 | 165  | 2,95  |
| -    | SMD_3715 | 50   | 2,84 | 24   | 4,79  |
| -    | SMD_3716 | 26   | 4,61 | 18   | 4,49  |
| -    | SMD_3717 | 142  | 3,48 | 220  | 2,69  |
| hemC | SMD_3718 | 25   | 4,76 | 31   | 4,89  |
| -    | SMD_3719 | 48   | 2,78 | 41   | 2,87  |
| estB | SMD_3721 | 46   | 3,76 | 62   | 3,72  |
| -    | SMD_3722 | 43   | 3,59 | 32   | 4,27  |
| cirA | SMD_3723 | 36   | 3,06 | 19   | 6,26  |
| -    | SMD_3725 | 20   | 4,53 | 21   | 5,65  |
| -    | SMD_3733 | 33   | 3,95 | 41   | 2,77  |
| -    | SMD_3735 | 67   | 2,59 | 113  | 2,55  |
| gst5 | SMD_3746 | 298  | 2,97 | 210  | 3,74  |
| -    | SMD_3747 | 88   | 2,46 | 57   | 3,25  |
| -    | SMD_3748 | 46   | 1,41 | 22   | 3,41  |
| hnsB | SMD_3749 | 21   | 1,75 | 26   | 1,72  |
| -    | SMD_3755 | 112  | 2,23 | 108  | 2,73  |
| -    | SMD_3757 | 24   | 6,31 | 23   | 16,66 |
| -    | SMD_3758 | 30   | 3,35 | 18   | 3,56  |
| -    | SMD_3760 | 84   | 2,89 | 47   | 3,64  |
| -    | SMD_3761 | 37   | 1,31 | 20   | 2,98  |
| -    | SMD_3762 | 74   | 3,77 | 30   | 6,04  |
| rpoD | SMD_3765 | 311  | 2,69 | 314  | 2,92  |
| ribA | SMD_3768 | 44   | 3,01 | 67   | 3,37  |
| -    | SMD_3769 | 40   | 2,49 | 29   | 3,87  |

|       |          |      |      |      |      |
|-------|----------|------|------|------|------|
| waaE  | SMD_3772 | 98   | 3,19 | 85   | 3,81 |
| -     | SMD_3773 | 155  | 3,20 | 136  | 3,43 |
| -     | SMD_3774 | 106  | 3,04 | 94   | 3,45 |
| rsmB  | SMD_3775 | 114  | 2,88 | 143  | 2,96 |
| def   | SMD_3777 | 63   | 3,56 | 72   | 2,68 |
| -     | SMD_3778 | 22   | 5,58 | 24   | 5,33 |
| smf   | SMD_3779 | 25   | 2,99 | 20   | 3,63 |
| smg   | SMD_3780 | 52   | 4,84 | 73   | 3,16 |
| -     | SMD_3781 | 41   | 4,28 | 58   | 4,04 |
| -     | SMD_3782 | 86   | 2,82 | 60   | 3,57 |
| topA  | SMD_3783 | 120  | 2,47 | 96   | 3,06 |
| -     | SMD_3784 | 63   | 3,09 | 38   | 4,30 |
| panE  | SMD_3787 | 38   | 3,10 | 72   | 3,29 |
| sppA  | SMD_3789 | 149  | 3,09 | 146  | 3,24 |
| -     | SMD_3792 | 64   | 4,14 | 78   | 4,03 |
| priA  | SMD_3793 | 30   | 3,59 | 26   | 3,96 |
| -     | SMD_3802 | 124  | 4,13 | 84   | 6,29 |
| aroG  | SMD_3803 | 94   | 4,69 | 112  | 5,29 |
| -     | SMD_3804 | 20   | 1,77 | 17   | 4,64 |
| -     | SMD_3811 | 45   | 3,68 | 24   | 5,11 |
| -     | SMD_3812 | 55   | 3,51 | 38   | 4,36 |
| groEL | SMD_3813 | 9271 | 3,46 | 8369 | 3,77 |
| groES | SMD_3814 | 4349 | 3,64 | 4498 | 3,82 |
| -     | SMD_3817 | 30   | 2,61 | 39   | 3,84 |
| -     | SMD_3818 | 35   | 2,71 | 48   | 2,72 |
| -     | SMD_3824 | 34   | 3,05 | 22   | 4,28 |
| -     | SMD_3826 | 23   | 6,44 | 32   | 5,96 |
| -     | SMD_3827 | 35   | 5,12 | 46   | 3,49 |
| -     | SMD_3830 | 16   | 4,11 | 23   | 3,87 |
| aroQ  | SMD_3832 | 119  | 2,54 | 61   | 3,89 |
| accB  | SMD_3834 | 504  | 2,20 | 1013 | 2,14 |
| accC  | SMD_3835 | 886  | 1,94 | 1507 | 2,02 |
| -     | SMD_3836 | 145  | 2,17 | 176  | 3,29 |
| -     | SMD_3837 | 59   | 2,87 | 52   | 3,32 |
| prmA  | SMD_3838 | 56   | 3,20 | 45   | 4,03 |

|       |          |     |      |      |      |
|-------|----------|-----|------|------|------|
| -     | SMD_3839 | 44  | 3,96 | 49   | 3,43 |
| cdsA2 | SMD_3841 | 98  | 2,28 | 38   | 4,47 |
| -     | SMD_3842 | 68  | 2,72 | 40   | 3,07 |
| purH  | SMD_3847 | 77  | 2,86 | 90   | 3,22 |
| rpoH  | SMD_3850 | 46  | 4,52 | 55   | 4,41 |
| ung   | SMD_3851 | 180 | 2,45 | 223  | 2,84 |
| -     | SMD_3852 | 128 | 2,71 | 126  | 2,50 |
| ftsE  | SMD_3854 | 121 | 3,34 | 133  | 3,25 |
| rhIB  | SMD_3855 | 125 | 3,22 | 155  | 2,84 |
| -     | SMD_3856 | 62  | 3,95 | 40   | 4,04 |
| trxA  | SMD_3857 | 306 | 1,93 | 470  | 2,62 |
| -     | SMD_3858 | 809 | 2,62 | 635  | 2,98 |
| rho   | SMD_3859 | 425 | 2,51 | 423  | 2,64 |
| -     | SMD_3860 | 32  | 4,00 | 26   | 5,90 |
| icd   | SMD_3868 | 242 | 2,89 | 293  | 2,75 |
| -     | SMD_3869 | 29  | 3,30 | 34   | 4,05 |
| -     | SMD_3871 | 48  | 3,71 | 53   | 3,42 |
| -     | SMD_3872 | 36  | 3,05 | 26   | 3,97 |
| smel  | SMD_3873 | 22  | 3,84 | 17   | 4,04 |
| smeK  | SMD_3875 | 33  | 3,10 | 25   | 3,69 |
| -     | SMD_3876 | 16  | 3,55 | 18   | 2,95 |
| aas   | SMD_3878 | 36  | 3,48 | 36   | 3,95 |
| -     | SMD_3879 | 574 | 3,03 | 642  | 3,41 |
| -     | SMD_3880 | 607 | 2,74 | 1703 | 2,42 |
| -     | SMD_3881 | 102 | 2,59 | 174  | 3,54 |
| -     | SMD_3882 | 103 | 3,70 | 65   | 4,50 |
| nudC  | SMD_3883 | 84  | 2,76 | 60   | 4,34 |
| -     | SMD_3884 | 90  | 4,13 | 56   | 4,27 |
| -     | SMD_3885 | 142 | 2,54 | 153  | 2,78 |
| -     | SMD_3888 | 57  | 3,92 | 60   | 3,11 |
| -     | SMD_3889 | 70  | 3,41 | 74   | 4,12 |
| bfr2  | SMD_3890 | 168 | 3,36 | 157  | 3,13 |
| -     | SMD_3891 | 78  | 1,38 | 36   | 4,98 |
| nudH  | SMD_3892 | 65  | 3,11 | 66   | 3,43 |
| rpsI  | SMD_3895 | 896 | 2,40 | 1404 | 2,62 |

|       |          |      |      |      |      |
|-------|----------|------|------|------|------|
| rplM  | SMD_3896 | 3778 | 2,33 | 5388 | 2,49 |
| -     | SMD_3897 | 104  | 3,32 | 102  | 3,20 |
| sugE2 | SMD_3898 | 180  | 3,24 | 172  | 2,99 |
| speD  | SMD_3899 | 227  | 2,79 | 289  | 2,61 |
| crp   | SMD_3900 | 244  | 3,11 | 229  | 3,44 |
| -     | SMD_3901 | 203  | 3,04 | 192  | 3,62 |
| -     | SMD_3902 | 114  | 3,38 | 110  | 3,43 |
| trpC  | SMD_3903 | 109  | 3,25 | 127  | 3,39 |
| trpD  | SMD_3904 | 121  | 2,95 | 131  | 2,66 |
| pabA  | SMD_3905 | 99   | 2,98 | 127  | 3,45 |
| trpE  | SMD_3907 | 41   | 4,46 | 31   | 6,54 |
| -     | SMD_3908 | 38   | 3,22 | 48   | 3,91 |
| rpe   | SMD_3910 | 57   | 2,46 | 196  | 1,91 |
| purC  | SMD_3912 | 22   | 4,62 | 22   | 4,58 |
| -     | SMD_3913 | 26   | 2,67 | 16   | 4,95 |
| phaAB | SMD_3914 | 35   | 2,76 | 30   | 3,80 |
| phaD  | SMD_3916 | 96   | 3,08 | 88   | 2,51 |
| phaE  | SMD_3917 | 131  | 2,50 | 73   | 2,64 |
| phaF  | SMD_3918 | 64   | 1,41 | 120  | 3,22 |
| yrbG  | SMD_3920 | 130  | 3,06 | 93   | 3,30 |
| -     | SMD_3922 | 210  | 2,12 | 110  | 2,35 |
| hmgA  | SMD_3923 | 131  | 2,13 | 107  | 2,56 |
| -     | SMD_3924 | 103  | 2,72 | 93   | 3,27 |
| -     | SMD_3926 | 31   | 4,40 | 42   | 4,34 |
| -     | SMD_3927 | 238  | 2,49 | 334  | 1,97 |
| -     | SMD_3928 | 296  | 2,20 | 403  | 2,59 |
| -     | SMD_3929 | 55   | 2,81 | 22   | 4,76 |
| pdhA  | SMD_3930 | 238  | 2,31 | 326  | 2,50 |
| pdhB  | SMD_3931 | 414  | 2,03 | 572  | 2,47 |
| -     | SMD_3932 | 641  | 2,07 | 808  | 2,18 |
| -     | SMD_3933 | 460  | 2,14 | 808  | 1,93 |
| -     | SMD_3938 | 77   | 3,05 | 65   | 3,19 |
| -     | SMD_3942 | 101  | 1,31 | 46   | 3,78 |
| -     | SMD_3946 | 44   | 5,63 | 33   | 6,89 |
| -     | SMD_3949 | 56   | 2,37 | 41   | 3,42 |

|       |          |     |      |     |      |
|-------|----------|-----|------|-----|------|
| speA  | SMD_3951 | 142 | 2,75 | 156 | 2,98 |
| speE  | SMD_3952 | 355 | 2,67 | 551 | 2,50 |
| lpxO  | SMD_3953 | 135 | 3,33 | 126 | 3,48 |
| -     | SMD_3954 | 19  | 3,14 | 19  | 2,94 |
| -     | SMD_3956 | 116 | 3,42 | 83  | 4,49 |
| glnB3 | SMD_3957 | 156 | 3,42 | 272 | 2,65 |
| -     | SMD_3959 | 468 | 3,10 | 769 | 3,28 |
| ubiA  | SMD_3995 | 18  | 2,79 | 23  | 4,56 |
| -     | SMD_3997 | 22  | 3,65 | 22  | 4,28 |
| agaS  | SMD_4001 | 22  | 3,55 | 16  | 1,76 |
| agaR  | SMD_4004 | 33  | 2,48 | 32  | 3,70 |
| nagA2 | SMD_4005 | 34  | 2,27 | 27  | 3,97 |
| -     | SMD_4006 | 27  | 3,96 | 26  | 3,50 |
| -     | SMD_4007 | 60  | 1,48 | 42  | 3,14 |
| bioF  | SMD_4013 | 50  | 3,06 | 34  | 3,24 |
| -     | SMD_4016 | 71  | 2,87 | 61  | 4,21 |
| -     | SMD_4017 | 90  | 3,14 | 62  | 3,37 |
| -     | SMD_4018 | 56  | 4,06 | 61  | 3,88 |
| -     | SMD_4019 | 52  | 3,87 | 72  | 3,72 |
| gidA  | SMD_4020 | 55  | 3,74 | 62  | 3,65 |
| smeC  | SMD_4021 | 25  | 4,00 | 22  | 5,05 |
| -     | SMD_4027 | 49  | 2,71 | 37  | 3,84 |
| -     | SMD_4028 | 57  | 3,38 | 42  | 3,19 |
| -     | SMD_4029 | 48  | 2,81 | 45  | 3,52 |
| -     | SMD_4030 | 87  | 2,59 | 84  | 2,77 |
| -     | SMD_4032 | 98  | 2,44 | 125 | 1,89 |
| -     | SMD_4033 | 82  | 2,55 | 57  | 3,28 |
| -     | SMD_4034 | 182 | 2,87 | 179 | 2,82 |
| -     | SMD_4035 | 173 | 2,89 | 179 | 2,78 |
| -     | SMD_4036 | 126 | 3,14 | 97  | 3,37 |
| ilvD  | SMD_4038 | 33  | 3,36 | 39  | 2,63 |
| aroE  | SMD_4041 | 53  | 3,72 | 85  | 2,95 |
| -     | SMD_4042 | 72  | 2,99 | 97  | 3,51 |
| hemB  | SMD_4044 | 111 | 2,72 | 344 | 2,20 |
| -     | SMD_4045 | 36  | 3,75 | 60  | 3,21 |

|       |          |     |       |     |       |
|-------|----------|-----|-------|-----|-------|
| -     | SMD_4046 | 121 | 2,81  | 160 | 3,08  |
| -     | SMD_4047 | 121 | 3,19  | 116 | 4,19  |
| -     | SMD_4048 | 55  | 3,12  | 64  | 3,95  |
| -     | SMD_4049 | 135 | 2,53  | 112 | 3,03  |
| -     | SMD_4050 | 108 | 2,92  | 108 | 2,80  |
| gst6  | SMD_4051 | 36  | 3,97  | 16  | 4,04  |
| -     | SMD_4052 | 182 | 2,88  | 197 | 2,69  |
| -     | SMD_4053 | 66  | 4,02  | 66  | 3,91  |
| -     | SMD_4056 | 38  | 2,40  | 55  | 2,44  |
| -     | SMD_4057 | 35  | 2,66  | 36  | 2,76  |
| -     | SMD_4058 | 40  | 1,77  | 37  | 3,42  |
| -     | SMD_4063 | 72  | 2,93  | 57  | 3,34  |
| -     | SMD_4064 | 54  | 3,64  | 45  | 3,45  |
| -     | SMD_4065 | 89  | 2,59  | 76  | 4,12  |
| -     | SMD_4066 | 41  | 3,44  | 29  | 4,86  |
| -     | SMD_4068 | 77  | 3,72  | 91  | 3,73  |
| tatD  | SMD_4069 | 78  | 2,85  | 68  | 4,00  |
| hrpB  | SMD_4070 | 31  | 3,65  | 42  | 3,34  |
| -     | SMD_4071 | 142 | 3,35  | 206 | 3,17  |
| -     | SMD_4073 | 45  | 3,03  | 30  | 4,90  |
| -     | SMD_4075 | 98  | 10,69 | 92  | 10,37 |
| rtcB  | SMD_4076 | 66  | 7,95  | 60  | 8,16  |
| -     | SMD_4077 | 96  | 7,60  | 93  | 8,45  |
| -     | SMD_4078 | 59  | 7,78  | 53  | 7,72  |
| -     | SMD_4083 | 43  | 3,31  | 38  | 3,95  |
| -     | SMD_4085 | 66  | 3,70  | 38  | 6,04  |
| kefB  | SMD_4086 | 73  | 2,81  | 71  | 3,79  |
| -     | SMD_4087 | 83  | 3,10  | 78  | 3,38  |
| ycgL  | SMD_4088 | 66  | 4,60  | 26  | 5,78  |
| -     | SMD_4089 | 162 | 2,25  | 313 | 1,91  |
| fabF2 | SMD_4090 | 140 | 2,11  | 156 | 2,20  |
| fabG5 | SMD_4091 | 142 | 2,15  | 190 | 2,25  |
| -     | SMD_4092 | 97  | 1,31  | 120 | 2,33  |
| -     | SMD_4093 | 168 | 2,34  | 234 | 2,29  |
| -     | SMD_4094 | 63  | 3,25  | 68  | 2,14  |

|       |          |      |      |      |      |
|-------|----------|------|------|------|------|
| -     | SMD_4095 | 106  | 2,52 | 167  | 2,11 |
| -     | SMD_4096 | 97   | 2,45 | 142  | 2,43 |
| -     | SMD_4097 | 143  | 2,18 | 126  | 2,71 |
| -     | SMD_4098 | 190  | 1,27 | 188  | 2,45 |
| -     | SMD_4099 | 94   | 2,15 | 123  | 2,08 |
| -     | SMD_4101 | 115  | 2,76 | 140  | 2,99 |
| -     | SMD_4102 | 156  | 2,94 | 252  | 2,82 |
| -     | SMD_4103 | 186  | 2,76 | 222  | 2,81 |
| acpP2 | SMD_4104 | 138  | 2,56 | 219  | 2,01 |
| -     | SMD_4106 | 61   | 3,04 | 54   | 4,00 |
| -     | SMD_4107 | 36   | 3,49 | 36   | 4,34 |
| -     | SMD_4114 | 73   | 2,91 | 96   | 2,80 |
| -     | SMD_4116 | 23   | 3,48 | 17   | 3,02 |
| -     | SMD_4118 | 28   | 3,86 | 53   | 3,29 |
| hemF  | SMD_4119 | 33   | 3,50 | 31   | 3,56 |
| -     | SMD_4120 | 49   | 3,32 | 40   | 4,03 |
| polA  | SMD_4122 | 79   | 2,83 | 86   | 3,28 |
| -     | SMD_4125 | 107  | 2,34 | 156  | 2,99 |
| uvrD  | SMD_4127 | 88   | 3,11 | 111  | 3,51 |
| -     | SMD_4128 | 53   | 3,45 | 33   | 4,70 |
| rpmG  | SMD_4131 | 319  | 3,79 | 446  | 3,96 |
| rpmB  | SMD_4132 | 2171 | 3,31 | 3322 | 3,77 |
| -     | SMD_4133 | 33   | 4,38 | 55   | 4,63 |
| smmP  | SMD_4139 | 28   | 3,30 | 24   | 4,03 |
| smmQ  | SMD_4140 | 72   | 2,86 | 89   | 2,52 |
| -     | SMD_4141 | 107  | 3,34 | 86   | 3,56 |
| DPM1  | SMD_4143 | 107  | 3,56 | 52   | 7,41 |
| -     | SMD_4144 | 35   | 3,65 | 25   | 3,95 |
| -     | SMD_4145 | 232  | 2,67 | 239  | 2,50 |
| parB  | SMD_4146 | 159  | 2,63 | 98   | 3,43 |
| parA  | SMD_4147 | 95   | 3,18 | 93   | 3,17 |
| gidB  | SMD_4148 | 23   | 4,21 | 21   | 4,76 |
| -     | SMD_4150 | 277  | 3,29 | 203  | 3,09 |
| xthA3 | SMD_4151 | 78   | 3,26 | 62   | 3,38 |
| acsA  | SMD_4155 | 119  | 3,48 | 140  | 3,63 |



|      |          |     |      |     |      |
|------|----------|-----|------|-----|------|
| -    | SMD_4156 | 108 | 3,99 | 85  | 4,92 |
| -    | SMD_4157 | 72  | 3,31 | 48  | 3,30 |
| -    | SMD_4158 | 46  | 2,59 | 50  | 2,83 |
| -    | SMD_4159 | 217 | 2,56 | 335 | 2,45 |
| hscC | SMD_4160 | 41  | 3,20 | 39  | 3,76 |
| -    | SMD_4161 | 450 | 2,31 | 298 | 3,26 |
| -    | SMD_4162 | 111 | 2,39 | 93  | 2,83 |
| -    | SMD_4164 | 153 | 2,20 | 140 | 2,45 |
| -    | SMD_4165 | 87  | 2,62 | 91  | 3,40 |
| glyS | SMD_4166 | 177 | 2,54 | 190 | 2,92 |
| glyQ | SMD_4167 | 88  | 3,14 | 111 | 3,56 |
| -    | SMD_4169 | 48  | 3,62 | 44  | 4,03 |
| tatC | SMD_4171 | 104 | 3,39 | 78  | 4,15 |
| tatB | SMD_4172 | 102 | 3,95 | 108 | 3,71 |
| tatE | SMD_4173 | 218 | 3,46 | 91  | 5,24 |
| -    | SMD_4174 | 69  | 5,37 | 90  | 4,33 |
| -    | SMD_4177 | 44  | 3,21 | 46  | 3,84 |
| -    | SMD_4190 | 76  | 2,46 | 60  | 3,10 |
| -    | SMD_4191 | 136 | 2,86 | 111 | 2,91 |
| -    | SMD_4192 | 146 | 2,64 | 141 | 3,11 |
| -    | SMD_4193 | 16  | 4,03 | 19  | 4,30 |
| -    | SMD_4198 | 303 | 2,20 | 198 | 2,72 |
| -    | SMD_4199 | 215 | 2,23 | 287 | 2,23 |
| -    | SMD_4200 | 149 | 2,65 | 269 | 2,45 |
| -    | SMD_4201 | 110 | 2,45 | 133 | 2,68 |
| foIE | SMD_4202 | 191 | 2,94 | 273 | 3,02 |
| -    | SMD_4206 | 24  | 3,40 | 25  | 4,72 |
| -    | SMD_4208 | 66  | 3,47 | 36  | 2,50 |
| recD | SMD_4209 | 52  | 2,84 | 74  | 2,80 |
| recB | SMD_4210 | 96  | 2,31 | 108 | 2,39 |
| recC | SMD_4211 | 44  | 2,76 | 36  | 3,57 |
| -    | SMD_4212 | 57  | 3,80 | 47  | 4,33 |
| -    | SMD_4213 | 38  | 2,57 | 28  | 3,95 |
| -    | SMD_4214 | 122 | 2,43 | 92  | 4,10 |
| -    | SMD_4215 | 187 | 2,63 | 250 | 2,84 |

|      |          |     |      |     |      |
|------|----------|-----|------|-----|------|
| -    | SMD_4216 | 249 | 2,59 | 331 | 2,69 |
| -    | SMD_4217 | 169 | 2,68 | 249 | 2,45 |
| btuE | SMD_4218 | 306 | 2,32 | 381 | 2,18 |
| rmuC | SMD_4220 | 69  | 2,71 | 46  | 2,86 |
| -    | SMD_4222 | 21  | 2,75 | 24  | 3,53 |
| -    | SMD_4225 | 43  | 4,20 | 49  | 3,42 |
| -    | SMD_4228 | 69  | 2,57 | 80  | 3,53 |
| -    | SMD_4229 | 100 | 2,79 | 92  | 3,94 |
| rlmI | SMD_4230 | 224 | 2,97 | 255 | 3,31 |
| -    | SMD_4233 | 40  | 3,82 | 29  | 6,66 |
| glpQ | SMD_4234 | 57  | 4,88 | 51  | 6,81 |
| trmE | SMD_4235 | 54  | 3,03 | 78  | 3,75 |
| -    | SMD_4236 | 33  | 3,17 | 48  | 3,39 |
| yidC | SMD_4237 | 259 | 2,76 | 282 | 3,11 |
| rpmH | SMD_4239 | 236 | 3,84 | 298 | 3,52 |

Genes grouped in operons are framed with a thick line

**Table S3. Overview of *S. maltophilia* mRNA half-lives as a function of their functional category**

| <b>Category</b>                                  | <b>Subcategory</b>                                    | <b>Median Half life in D457</b> | <b>No of genes in subcategory</b> |
|--------------------------------------------------|-------------------------------------------------------|---------------------------------|-----------------------------------|
| Respiration                                      | Electron donating reactions                           | 2,02                            | 19                                |
| Cell Wall and Capsule                            | Capsular and extracellular polysaccharides            | 2,27                            | 11                                |
| Carbohydrates                                    | Monosaccharides                                       | 2,28                            | 15                                |
| Fatty Acids, Lipids, and Isoprenoids             | Fatty acids                                           | 2,34                            | 20                                |
| Fatty Acids, Lipids, and Isoprenoids             | Isoprenoids                                           | 2,43                            | 13                                |
| Carbohydrates                                    | One-carbon Metabolism                                 | 2,50                            | 22                                |
| Virulence, Disease and Defense                   | Resistance to antibiotics and toxic compounds         | 2,52                            | 8                                 |
| RNA Metabolism                                   | RNA processing and modification                       | 2,52                            | 31                                |
| Carbohydrates                                    | Central carbohydrate metabolism                       | 2,52                            | 55                                |
| Carbohydrates                                    | Aminosugars                                           | 2,52                            | 8                                 |
| Carbohydrates                                    | Organic acids                                         | 2,55                            | 12                                |
| Amino Acids and Derivatives                      | Branched-chain amino acids                            | 2,56                            | 29                                |
| Protein Metabolism                               | Protein processing and modification                   | 2,59                            | 11                                |
| Cell Wall and Capsule                            | Gram-Negative cell wall components                    | 2,59                            | 11                                |
| Fatty Acids, Lipids, and Isoprenoids             | Fatty Acids, Lipids, and Isoprenoids - no subcategory | 2,61                            | 8                                 |
| Carbohydrates                                    | Fermentation                                          | 2,64                            | 9                                 |
| Cofactors, Vitamins, Prosthetic Groups, Pigments | NAD and NADP                                          | 2,70                            | 12                                |
| Protein Metabolism                               | Protein biosynthesis                                  | 2,72                            | 30                                |
| Regulation and Cell signaling                    | Regulation and Cell signaling - no subcategory        | 2,72                            | 11                                |
| Amino Acids and Derivatives                      | Alanine, serine, and glycine                          | 2,74                            | 16                                |
| Cell Wall and Capsule                            | Cell Wall and Capsule - no subcategory                | 2,74                            | 29                                |
| Amino Acids and Derivatives                      | Lysine, threonine, methionine, and cysteine           | 2,80                            | 31                                |
| Fatty Acids, Lipids, and Isoprenoids             | Phospholipids                                         | 2,81                            | 16                                |
| Nucleosides and Nucleotides                      | Purines                                               | 2,81                            | 26                                |
| Protein Metabolism                               | Protein degradation                                   | 2,81                            | 14                                |
| Amino Acids and Derivatives                      | Aromatic amino acids and derivatives                  | 2,82                            | 21                                |
| Cofactors, Vitamins, Prosthetic Groups, Pigments | Folate and pterines                                   | 2,84                            | 34                                |

|                                                  |                      |      |    |
|--------------------------------------------------|----------------------|------|----|
| Nucleosides and Nucleotides                      | Detoxification       | 2,89 | 9  |
| Nucleosides and Nucleotides                      | Pyrimidines          | 2,89 | 19 |
| DNA Metabolism                                   | DNA repair           | 2,91 | 16 |
| Stress Response                                  | Oxidative stress     | 2,98 | 25 |
| Cofactors, Vitamins, Prosthetic Groups, Pigments | Riboflavin, FMN, FAD | 3,14 | 8  |

---

**Table S4. Functional categories of genes analyzed in the article**

| Name   | Gene     | Half time D457 | Half time ALB001 | EC number               | Category                                         | Subcategory                                   |
|--------|----------|----------------|------------------|-------------------------|--------------------------------------------------|-----------------------------------------------|
| gyrB   | SMD_0004 | 2,60           | 2,66             | EC_5.99.1.3             | DNA Metabolism                                   | DNA replication                               |
| gyrB   | SMD_0004 | 2,60           | 2,66             | EC_5.99.1.3             | Virulence, Disease and Defense                   | Resistance to antibiotics and toxic compounds |
| aspC   | SMD_0018 | 2,92           | 3,16             | EC_2.6.1.57             | Cofactors, Vitamins, Prosthetic Groups, Pigments | Folate and pterines                           |
| aspC   | SMD_0018 | 2,92           | 3,16             | EC_2.6.1.57             | Metabolism of Aromatic Compounds                 | Metabolism of central aromatic intermediates  |
| -      | SMD_0025 | 3,27           | 2,51             | EC_1.1.1.1              | Carbohydrates                                    | Fermentation                                  |
| -      | SMD_0025 | 3,27           | 2,51             | EC_1.1.1.1              | Cofactors, Vitamins, Prosthetic Groups, Pigments | Folate and pterines                           |
| -      | SMD_0025 | 3,27           | 2,51             | EC_1.1.1.1              | Fatty Acids, Lipids, and Isoprenoids             | Phospholipids                                 |
| phhA   | SMD_0029 | 3,32           | 4,69             | EC_1.14.16.1            | Amino Acids and Derivatives                      | Aromatic amino acids and derivatives          |
| phhA   | SMD_0029 | 3,32           | 4,69             | EC_1.14.16.1            | Cofactors, Vitamins, Prosthetic Groups, Pigments | Folate and pterines                           |
| fpg    | SMD_0041 | 3,85           | 3,11             | EC_3.2.2.23             | DNA Metabolism                                   | DNA repair                                    |
| tdk    | SMD_0043 | 3,93           | 4,60             | EC_2.7.1.21             | Nucleosides and Nucleotides                      | Pyrimidines                                   |
| pyrF   | SMD_0054 | 3,32           | 2,86             | EC_4.1.1.23             | Nucleosides and Nucleotides                      | Pyrimidines                                   |
| plsB   | SMD_0057 | 3,06           | 4,14             | EC_2.3.1.15             | Fatty Acids, Lipids, and Isoprenoids             | Phospholipids                                 |
| -      | SMD_0061 | 3,38           | 4,01             | EC_4.2.3.3              | Carbohydrates                                    | Central carbohydrate metabolism               |
| gltB   | SMD_0064 | 3,18           | 3,01             | EC_1.4.1.13             | Nitrogen Metabolism                              | Nitrogen Metabolism                           |
| plsC   | SMD_0096 | 4,11           | 3,81             | EC_2.3.1.51             | Fatty Acids, Lipids, and Isoprenoids             | Phospholipids                                 |
| glnA   | SMD_0103 | 3,71           | 3,97             | EC_6.3.1.2              | Cell Wall and Capsule                            | Cell Wall and Capsule                         |
| glnA   | SMD_0103 | 3,71           | 3,97             | EC_6.3.1.2              | Nitrogen Metabolism                              | Nitrogen Metabolism                           |
| ampDII | SMD_0107 | 3,61           | 3,36             | EC_3.5.1.28             | Cell Wall and Capsule                            | Cell Wall and Capsule                         |
| ampDII | SMD_0107 | 3,61           | 3,36             | EC_3.5.1.28             | Regulation and Cell signaling                    | Regulation and Cell signaling                 |
| mltA   | SMD_0108 | 4,01           | 5,58             | EC_3.2.1.-              | Cell Wall and Capsule                            | Cell Wall and Capsule                         |
| sodC   | SMD_0114 | 2,79           | 2,82             | EC_1.15.1.1             | Stress Response                                  | Oxidative stress                              |
| sodC2  | SMD_0115 | 2,64           | 2,63             | EC_1.15.1.1             | Stress Response                                  | Oxidative stress                              |
| -      | SMD_0118 | 4,30           | 3,61             | EC_2.3.1.16             | Amino Acids and Derivatives                      | Branched-chain amino acids                    |
| -      | SMD_0118 | 4,30           | 3,61             | EC_2.3.1.16, EC_2.3.1.9 | Carbohydrates                                    | One-carbon Metabolism                         |
| -      | SMD_0118 | 4,30           | 3,61             | EC_2.3.1.9              | Carbohydrates                                    | Fermentation                                  |
| -      | SMD_0118 | 4,30           | 3,61             | EC_2.3.1.16             | Cofactors, Vitamins, Prosthetic Groups, Pigments | Biotin                                        |
| -      | SMD_0118 | 4,30           | 3,61             | EC_2.3.1.16, EC_2.3.1.9 | Fatty Acids, Lipids, and Isoprenoids             | Fatty Acids, Lipids, and Isoprenoids          |
| -      | SMD_0118 | 4,30           | 3,61             | EC_2.3.1.9              | Fatty Acids, Lipids, and Isoprenoids             | Isoprenoids                                   |
| gpsA   | SMD_0126 | 2,41           | 2,40             | EC_1.1.1.94             | Carbohydrates                                    | Sugar alcohols                                |
| gpsA   | SMD_0126 | 2,41           | 2,40             | EC_1.1.1.94             | Fatty Acids, Lipids, and Isoprenoids             | Phospholipids                                 |
| -      | SMD_0156 | 3,09           | 4,13             | EC_2.6.1.1              | Amino Acids and Derivatives                      | Lysine, threonine, methionine, and cysteine   |
| -      | SMD_0169 | 2,64           | 3,40             | EC_1.5.5.1              | Carbohydrates                                    | Fermentation                                  |
| -      | SMD_0169 | 2,64           | 3,40             | EC_1.5.5.1              | Respiration                                      | Electron accepting reactions                  |
| truC   | SMD_0188 | 3,99           | 3,75             | EC_4.2.1.70             | RNA Metabolism                                   | RNA processing and modification               |

|       |          |      |                              |                                                  |                                             |
|-------|----------|------|------------------------------|--------------------------------------------------|---------------------------------------------|
| dcp   | SMD_0192 | 3,06 | 3,12 EC_3.4.15.5             | Protein Metabolism                               | Protein degradation                         |
| lepB2 | SMD_0195 | 4,59 | 3,71 EC_3.4.21.89            | Protein Metabolism                               | Protein processing and modification         |
| -     | SMD_0202 | 3,08 | 3,16 EC_4.6.1.1              | Regulation and Cell signaling                    | Regulation and Cell signaling               |
| -     | SMD_0205 | 2,17 | 2,34 EC_6.4.1.4              | Amino Acids and Derivatives                      | Branched-chain amino acids                  |
| -     | SMD_0205 | 2,17 | 2,34 EC_6.4.1.4              | Carbohydrates                                    | One-carbon Metabolism                       |
| -     | SMD_0206 | 2,19 | 2,05 EC_6.4.1.4              | Amino Acids and Derivatives                      | Branched-chain amino acids                  |
| -     | SMD_0206 | 2,19 | 2,05 EC_6.4.1.4              | Carbohydrates                                    | One-carbon Metabolism                       |
| ivd   | SMD_0207 | 2,27 | 2,95 EC_1.3.8.4              | Amino Acids and Derivatives                      | Branched-chain amino acids                  |
| RRM1  | SMD_0215 | 2,87 | 3,09 EC_1.17.4.1             | Nucleosides and Nucleotides                      | Nucleosides and Nucleotides                 |
| RRM2  | SMD_0216 | 2,17 | 2,50 EC_1.17.4.1             | Nucleosides and Nucleotides                      | Nucleosides and Nucleotides                 |
| purU  | SMD_0222 | 3,19 | 4,03 EC_3.5.1.10             | Carbohydrates                                    | One-carbon Metabolism                       |
| purU  | SMD_0222 | 3,19 | 4,03 EC_3.5.1.10             | Cofactors, Vitamins, Prosthetic Groups, Pigments | Folate and pterines                         |
| pncA  | SMD_0223 | 3,01 | 3,58 EC_3.5.1.19             | Cofactors, Vitamins, Prosthetic Groups, Pigments | NAD and NADP                                |
| pncA  | SMD_0223 | 3,01 | 3,58 EC_3.5.1.19             | Stress Response                                  | Oxidative stress                            |
| -     | SMD_0225 | 4,54 | 5,55 EC_2.4.2.12             | Cofactors, Vitamins, Prosthetic Groups, Pigments | NAD and NADP                                |
| -     | SMD_0226 | 4,68 | 5,89 EC_2.7.7.1, EC_3.6.1.13 | Cofactors, Vitamins, Prosthetic Groups, Pigments | NAD and NADP                                |
| -     | SMD_0230 | 2,58 | 2,56 EC_1.3.99.12            | Amino Acids and Derivatives                      | Branched-chain amino acids                  |
| -     | SMD_0232 | 2,56 | 2,11 EC_3.1.2.4              | Amino Acids and Derivatives                      | Branched-chain amino acids                  |
| mmsB  | SMD_0233 | 2,94 | 2,77 EC_1.1.1.31             | Amino Acids and Derivatives                      | Branched-chain amino acids                  |
| birA  | SMD_0265 | 4,21 | 3,87 EC_6.3.4.15             | Cofactors, Vitamins, Prosthetic Groups, Pigments | Biotin                                      |
| trpS  | SMD_0280 | 3,12 | 3,32 EC_6.1.1.2              | Protein Metabolism                               | Protein biosynthesis                        |
| katA  | SMD_0296 | 3,48 | 4,83 EC_1.11.1.6             | Stress Response                                  | Oxidative stress                            |
| -     | SMD_0297 | 3,26 | 2,88 EC_3.4.11.23            | Protein Metabolism                               | Protein degradation                         |
| argS  | SMD_0318 | 3,27 | 3,23 EC_6.1.1.19             | Protein Metabolism                               | Protein biosynthesis                        |
| dfp   | SMD_0321 | 3,37 | 3,41 EC_4.1.1.36, EC_6.3.2.5 | Cofactors, Vitamins, Prosthetic Groups, Pigments | Coenzyme A                                  |
| dut   | SMD_0322 | 1,41 | 3,27 EC_3.6.1.23             | Nucleosides and Nucleotides                      | Detoxification                              |
| algC  | SMD_0323 | 2,59 | 2,61 EC_5.4.2.8              | Carbohydrates                                    | Monosaccharides                             |
| pyrE  | SMD_0330 | 2,35 | 2,49 EC_2.4.2.10             | Nucleosides and Nucleotides                      | Pyrimidines                                 |
| ampN  | SMD_0331 | 2,80 | 3,30 EC_3.1.11.2             | DNA Metabolism                                   | DNA repair                                  |
| -     | SMD_0334 | 2,63 | 3,76 EC_2.7.1.-              | Cell Wall and Capsule                            | Cell Wall and Capsule                       |
| tyrS  | SMD_0336 | 2,70 | 3,10 EC_6.1.1.1              | Protein Metabolism                               | Protein biosynthesis                        |
| ctpA  | SMD_0351 | 3,33 | 4,47 EC_3.4.21.102           | Miscellaneous                                    | Miscellaneous                               |
| nadR  | SMD_0355 | 2,34 | 2,39 EC_2.7.1.22, EC_2.7.7.1 | Cofactors, Vitamins, Prosthetic Groups, Pigments | NAD and NADP                                |
| dnaG  | SMD_0371 | 2,76 | 3,67 EC_2.7.7.-              | Cell Division and Cell Cycle                     | Cell Division and Cell Cycle                |
| folB  | SMD_0377 | 2,57 | 3,70 EC_4.1.2.25             | Cofactors, Vitamins, Prosthetic Groups, Pigments | Folate and pterines                         |
| glnE  | SMD_0399 | 2,80 | 4,63 EC_2.7.7.42             | Nitrogen Metabolism                              | Nitrogen Metabolism                         |
| aceE2 | SMD_0412 | 2,30 | 2,40 EC_1.2.4.1              | Amino Acids and Derivatives                      | Lysine, threonine, methionine, and cysteine |

|       |          |      |                   |                                                  |                                                     |
|-------|----------|------|-------------------|--------------------------------------------------|-----------------------------------------------------|
| aceE2 | SMD_0412 | 2,30 | 2,40 EC_1.2.4.1   | Carbohydrates                                    | Central carbohydrate metabolism                     |
| aceE2 | SMD_0412 | 2,30 | 2,40 EC_1.2.4.1   | Cofactors, Vitamins, Prosthetic Groups, Pigments | Folate and pterines                                 |
| msrB  | SMD_0479 | 3,43 | 3,03 EC_1.8.4.12  | Protein Metabolism                               | Protein processing and modification                 |
| dadA  | SMD_0483 | 3,52 | 3,87 EC_1.4.99.1  | Carbohydrates                                    | Central carbohydrate metabolism                     |
| dadA  | SMD_0483 | 3,52 | 3,87 EC_1.4.99.1  | Respiration                                      | Electron donating reactions                         |
| -     | SMD_0484 | 2,96 | 2,99 EC_5.1.1.1   | Amino Acids and Derivatives                      | Alanine, serine, and glycine                        |
| -     | SMD_0484 | 2,96 | 2,99 EC_5.1.1.1   | Carbohydrates                                    | Central carbohydrate metabolism                     |
| rsuA  | SMD_0490 | 2,79 | 2,98 EC_4.2.1.70  | RNA Metabolism                                   | RNA processing and modification                     |
| fabB  | SMD_0492 | 2,33 | 2,32 EC_2.3.1.41  | Fatty Acids, Lipids, and Isoprenoids             | Fatty acids                                         |
| fabA  | SMD_0493 | 2,19 | 2,23 EC_4.2.1.59  | Fatty Acids, Lipids, and Isoprenoids             | Fatty acids                                         |
| -     | SMD_0498 | 3,24 | 4,19 EC_2.1.1.-   | Membrane Transport                               | Protein and nucleoprotein secretion system, Type IV |
| gph   | SMD_0499 | 3,64 | 3,71 EC_3.1.3.18  | Carbohydrates                                    | Central carbohydrate metabolism                     |
| gph   | SMD_0499 | 3,64 | 3,71 EC_3.1.3.18  | DNA Metabolism                                   | DNA repair                                          |
| -     | SMD_0501 | 2,86 | 3,67 EC_3.1.3.73  | Miscellaneous                                    | Miscellaneous                                       |
| -     | SMD_0520 | 2,91 | 3,46 EC_5.2.1.2   | Cofactors, Vitamins, Prosthetic Groups, Pigments | Folate and pterines                                 |
| -     | SMD_0520 | 2,91 | 3,46 EC_5.2.1.2   | Metabolism of Aromatic Compounds                 | Metabolism of central aromatic intermediates        |
| -     | SMD_0520 | 2,91 | 3,46 EC_5.2.1.2   | Metabolism of Aromatic Compounds                 | Metabolism of Aromatic Compounds                    |
| -     | SMD_0520 | 2,91 | 3,46 EC_2.5.1.18  | Stress Response                                  | Oxidative stress                                    |
| cbsB  | SMD_0527 | 2,67 | 2,57 EC_4.2.1.22  | Amino Acids and Derivatives                      | Lysine, threonine, methionine, and cysteine         |
| cbsB  | SMD_0527 | 2,67 | 2,57 EC_4.2.1.22  | Amino Acids and Derivatives                      | Alanine, serine, and glycine                        |
| metC  | SMD_0528 | 2,64 | 2,47 EC_4.4.1.1   | Amino Acids and Derivatives                      | Lysine, threonine, methionine, and cysteine         |
| metC  | SMD_0528 | 2,64 | 2,47 EC_4.4.1.1   | Amino Acids and Derivatives                      | Alanine, serine, and glycine                        |
| -     | SMD_0533 | 1,96 | 1,84 EC_5.1.3.2   | Cell Wall and Capsule                            | Capsular and extracellular polysacchrides           |
| -     | SMD_0533 | 1,96 | 1,84 EC_5.1.3.2   | Protein Metabolism                               | Protein processing and modification                 |
| rfbB  | SMD_0544 | 2,35 | 2,32 EC_4.2.1.46  | Cell Wall and Capsule                            | Capsular and extracellular polysacchrides           |
| rmlA  | SMD_0545 | 2,19 | 2,32 EC_2.7.7.24  | Cell Wall and Capsule                            | Capsular and extracellular polysacchrides           |
| rmlC  | SMD_0546 | 1,97 | 2,23 EC_5.1.3.13  | Cell Wall and Capsule                            | Capsular and extracellular polysacchrides           |
| rfbD  | SMD_0547 | 2,05 | 2,31 EC_1.1.1.133 | Cell Wall and Capsule                            | Capsular and extracellular polysacchrides           |
| manA  | SMD_0548 | 2,12 | 2,30 EC_2.7.7.22  | Carbohydrates                                    | Monosaccharides                                     |
| spgM  | SMD_0549 | 2,47 | 2,51 EC_5.4.2.8   | Carbohydrates                                    | Monosaccharides                                     |
| lpsI  | SMD_0550 | 2,74 | 3,22 EC_2.8.3.5   | Amino Acids and Derivatives                      | Branched-chain amino acids                          |
| lpsI  | SMD_0550 | 2,74 | 3,22 EC_2.8.3.5   | Carbohydrates                                    | One-carbon Metabolism                               |
| lpsI  | SMD_0550 | 2,74 | 3,22 EC_2.8.3.5   | Metabolism of Aromatic Compounds                 | Metabolism of central aromatic intermediates        |
| lpsJ  | SMD_0551 | 2,20 | 2,52 EC_2.8.3.5   | Amino Acids and Derivatives                      | Branched-chain amino acids                          |
| lpsJ  | SMD_0551 | 2,20 | 2,52 EC_2.8.3.5   | Carbohydrates                                    | One-carbon Metabolism                               |
| lpsJ  | SMD_0551 | 2,20 | 2,52 EC_2.8.3.5   | Metabolism of Aromatic Compounds                 | Metabolism of central aromatic intermediates        |
| proS  | SMD_0559 | 3,00 | 3,15 EC_6.1.1.15  | Protein Metabolism                               | Protein biosynthesis                                |

|      |          |      |      |                           |                                                  |                                                     |
|------|----------|------|------|---------------------------|--------------------------------------------------|-----------------------------------------------------|
| pssA | SMD_0562 | 4,56 | 3,03 | EC_2.7.8.8                | Fatty Acids, Lipids, and Isoprenoids             | Phospholipids                                       |
| valS | SMD_0566 | 2,33 | 2,49 | EC_6.1.1.9                | Protein Metabolism                               | Protein biosynthesis                                |
| pepA | SMD_0569 | 2,92 | 2,72 | EC_3.4.11.1               | Carbohydrates                                    | Central carbohydrate metabolism                     |
| pepA | SMD_0569 | 2,92 | 2,72 | EC_3.4.11.1               | Protein Metabolism                               | Protein degradation                                 |
| purL | SMD_0576 | 2,55 | 2,59 | EC_6.3.5.3                | Nucleosides and Nucleotides                      | Purines                                             |
| wecB | SMD_0599 | 3,01 | 3,12 | EC_5.1.3.14               | Cell Wall and Capsule                            | Capsular and extracellular polysacchrides           |
| glyA | SMD_0607 | 3,32 | 3,13 | EC_2.1.2.1                | Amino Acids and Derivatives                      | Alanine, serine, and glycine                        |
| glyA | SMD_0607 | 3,32 | 3,13 | EC_2.1.2.1                | Carbohydrates                                    | One-carbon Metabolism                               |
| glyA | SMD_0607 | 3,32 | 3,13 | EC_2.1.2.1                | Cofactors, Vitamins, Prosthetic Groups, Pigments | Folate and pterines                                 |
| ribD | SMD_0611 | 3,08 | 4,61 | EC_1.1.1.193, EC_3.5.4.26 | Cofactors, Vitamins, Prosthetic Groups, Pigments | Riboflavin, FMN, FAD                                |
| ribE | SMD_0615 | 3,56 | 4,17 | EC_2.5.1.9                | Cofactors, Vitamins, Prosthetic Groups, Pigments | Riboflavin, FMN, FAD                                |
| ribB | SMD_0616 | 3,20 | 3,49 | EC_3.5.4.25               | Cofactors, Vitamins, Prosthetic Groups, Pigments | Riboflavin, FMN, FAD                                |
| ribB | SMD_0616 | 3,20 | 3,49 | EC_3.5.4.25               | Cofactors, Vitamins, Prosthetic Groups, Pigments | Folate and pterines                                 |
| ribH | SMD_0617 | 3,30 | 3,04 | EC_2.5.1.9                | Cofactors, Vitamins, Prosthetic Groups, Pigments | Riboflavin, FMN, FAD                                |
| thiL | SMD_0619 | 3,48 | 2,10 | EC_2.7.4.16               | Cofactors, Vitamins, Prosthetic Groups, Pigments | Cofactors, Vitamins, Prosthetic Groups, Pigments    |
| thiL | SMD_0619 | 3,48 | 2,10 | EC_2.7.4.16               | Cofactors, Vitamins, Prosthetic Groups, Pigments | Folate and pterines                                 |
| ftsI | SMD_0638 | 2,81 | 2,93 | EC_2.4.1.129              | Cell Division and Cell Cycle                     | Cell Division and Cell Cycle                        |
| ftsI | SMD_0638 | 2,81 | 2,93 | EC_2.4.1.129              | Cell Wall and Capsule                            | Cell Wall and Capsule                               |
| ftsI | SMD_0638 | 2,81 | 2,93 | EC_2.4.1.129              | RNA Metabolism                                   | RNA processing and modification                     |
| murE | SMD_0639 | 2,33 | 2,40 | EC_6.3.2.13               | Cell Wall and Capsule                            | Cell Wall and Capsule                               |
| murF | SMD_0640 | 2,18 | 2,27 | EC_6.3.2.10               | Cell Wall and Capsule                            | Cell Wall and Capsule                               |
| mraY | SMD_0641 | 1,90 | 2,11 | EC_2.7.8.13               | Cell Wall and Capsule                            | Cell Wall and Capsule                               |
| murG | SMD_0643 | 2,09 | 2,30 | EC_2.4.1.227              | Cell Wall and Capsule                            | Cell Wall and Capsule                               |
| murC | SMD_0644 | 2,05 | 2,01 | EC_6.3.2.8                | Cell Wall and Capsule                            | Cell Wall and Capsule                               |
| ddlB | SMD_0645 | 2,00 | 2,00 | EC_6.3.2.4                | Cell Wall and Capsule                            | Cell Wall and Capsule                               |
| ftsZ | SMD_0648 | 3,28 | 2,92 | EC_3.4.24.-               | Cell Division and Cell Cycle                     | Cell Division and Cell Cycle                        |
| metF | SMD_0654 | 3,71 | 4,36 | EC_1.5.1.20               | Amino Acids and Derivatives                      | Lysine, threonine, methionine, and cysteine         |
| metF | SMD_0654 | 3,71 | 4,36 | EC_1.5.1.20               | Carbohydrates                                    | One-carbon Metabolism                               |
| metF | SMD_0654 | 3,71 | 4,36 | EC_1.5.1.20               | Cofactors, Vitamins, Prosthetic Groups, Pigments | Folate and pterines                                 |
| sahH | SMD_0664 | 2,37 | 2,22 | EC_3.3.1.1                | Amino Acids and Derivatives                      | Lysine, threonine, methionine, and cysteine         |
| ppc  | SMD_0666 | 2,96 | 3,20 | EC_4.1.1.31               | Carbohydrates                                    | Central carbohydrate metabolism                     |
| metK | SMD_0668 | 2,61 | 2,22 | EC_2.5.1.6                | Amino Acids and Derivatives                      | Lysine, threonine, methionine, and cysteine         |
| -    | SMD_0672 | 2,71 | 4,23 | EC_2.1.1.-                | Membrane Transport                               | Protein and nucleoprotein secretion system, Type IV |
| rbsK | SMD_0675 | 2,59 | 2,56 | EC_2.7.1.15               | Carbohydrates                                    | Monosaccharides                                     |
| dgkA | SMD_0687 | 2,90 | 2,90 | EC_2.7.1.107              | Fatty Acids, Lipids, and Isoprenoids             | Phospholipids                                       |
| lgt  | SMD_0693 | 2,78 | 3,85 | EC_2.4.99.-               | Protein Metabolism                               | Protein processing and modification                 |
| thyA | SMD_0694 | 2,72 | 2,88 | EC_2.1.1.45               | Cofactors, Vitamins, Prosthetic Groups, Pigments | Folate and pterines                                 |



|       |          |      |                   |                                                  |                                             |
|-------|----------|------|-------------------|--------------------------------------------------|---------------------------------------------|
| thyA  | SMD_0694 | 2,72 | 2,88 EC_2.1.1.45  | Nucleosides and Nucleotides                      | Pyrimidines                                 |
| surA  | SMD_0701 | 2,59 | 2,72 EC_5.2.1.8   | Cell Wall and Capsule                            | Gram-Negative cell wall components          |
| surA  | SMD_0701 | 2,59 | 2,72 EC_5.2.1.8   | Protein Metabolism                               | Protein folding                             |
| ubiH  | SMD_0706 | 3,17 | 2,82 EC_1.14.13.- | Cofactors, Vitamins, Prosthetic Groups, Pigments | Quinone cofactors                           |
| ubiF  | SMD_0707 | 2,83 | 3,28 EC_1.14.13.- | Cofactors, Vitamins, Prosthetic Groups, Pigments | Quinone cofactors                           |
| glnS  | SMD_0713 | 3,04 | 3,17 EC_6.1.1.18  | Protein Metabolism                               | Protein biosynthesis                        |
| msrA2 | SMD_0715 | 2,59 | 3,38 EC_1.8.4.11  | Protein Metabolism                               | Protein processing and modification         |
| talB  | SMD_0716 | 2,49 | 2,46 EC_2.2.1.2   | Carbohydrates                                    | Central carbohydrate metabolism             |
| talB  | SMD_0716 | 2,49 | 2,46 EC_2.2.1.2   | Carbohydrates                                    | Monosaccharides                             |
| ahpC  | SMD_0720 | 4,72 | 5,18 EC_1.11.1.15 | Sulfur Metabolism                                | Sulfur Metabolism                           |
| nudF  | SMD_0728 | 2,71 | 2,86 EC_3.6.1.13  | Nucleosides and Nucleotides                      | Detoxification                              |
| -     | SMD_0731 | 2,89 | 3,46 EC_2.4.2.4   | Nucleosides and Nucleotides                      | Pyrimidines                                 |
| ilvE  | SMD_0740 | 2,75 | 2,81 EC_2.6.1.42  | Amino Acids and Derivatives                      | Branched-chain amino acids                  |
| ilvE  | SMD_0740 | 2,75 | 2,81 EC_2.6.1.42  | Amino Acids and Derivatives                      | Alanine, serine, and glycine                |
| ilvE  | SMD_0740 | 2,75 | 2,81 EC_2.6.1.42  | Carbohydrates                                    | Central carbohydrate metabolism             |
| ipk   | SMD_0753 | 2,43 | 2,84 EC_2.7.1.148 | Fatty Acids, Lipids, and Isoprenoids             | Isoprenoids                                 |
| prs   | SMD_0755 | 3,48 | 3,70 EC_2.7.6.1   | Carbohydrates                                    | Central carbohydrate metabolism             |
| prs   | SMD_0755 | 3,48 | 3,70 EC_2.7.6.1   | Nucleosides and Nucleotides                      | Purines                                     |
| pth   | SMD_0757 | 2,28 | 2,52 EC_3.1.1.29  | Dormancy and Sporulation                         | Dormancy and Sporulation                    |
| pth   | SMD_0757 | 2,28 | 2,52 EC_3.1.1.29  | Protein Metabolism                               | Protein biosynthesis                        |
| -     | SMD_0766 | 3,11 | 3,38 EC_3.4.19.5  | Protein Metabolism                               | Protein degradation                         |
| rpoB  | SMD_0778 | 2,35 | 2,33 EC_2.7.7.6   | RNA Metabolism                                   | Transcription                               |
| rpoB  | SMD_0778 | 2,35 | 2,33 EC_2.7.7.6   | Virulence, Disease and Defense                   | Invasion and intracellular resistance       |
| rpoC  | SMD_0779 | 2,11 | 2,11 EC_2.7.7.6   | RNA Metabolism                                   | Transcription                               |
| rpoC  | SMD_0779 | 2,11 | 2,11 EC_2.7.7.6   | Virulence, Disease and Defense                   | Invasion and intracellular resistance       |
| rpoA  | SMD_0809 | 2,32 | 2,29 EC_2.7.7.6   | RNA Metabolism                                   | Transcription                               |
| aroH  | SMD_0813 | 3,43 | 3,68 EC_2.5.1.54  | Amino Acids and Derivatives                      | Aromatic amino acids and derivatives        |
| ppiB  | SMD_0818 | 2,54 | 2,53 EC_5.2.1.8   | Potassium metabolism                             | Potassium metabolism                        |
| mdh   | SMD_0819 | 2,41 | 2,42 EC_1.1.1.37  | Carbohydrates                                    | Central carbohydrate metabolism             |
| mdh   | SMD_0819 | 2,41 | 2,42 EC_1.1.1.37  | Carbohydrates                                    | One-carbon Metabolism                       |
| rluA  | SMD_0820 | 3,18 | 3,21 EC_4.2.1.70  | Protein Metabolism                               | Protein biosynthesis                        |
| rluA  | SMD_0820 | 3,18 | 3,21 EC_4.2.1.70  | RNA Metabolism                                   | RNA processing and modification             |
| prpE  | SMD_0821 | 2,61 | 2,89 EC_6.2.1.17  | Carbohydrates                                    | Organic acids                               |
| gst   | SMD_0824 | 2,96 | 3,23 EC_2.5.1.18  | Stress Response                                  | Oxidative stress                            |
| kbl   | SMD_0833 | 2,70 | 2,98 EC_2.3.1.29  | Amino Acids and Derivatives                      | Alanine, serine, and glycine                |
| tdh   | SMD_0835 | 2,57 | 2,41 EC_1.1.1.103 | Amino Acids and Derivatives                      | Lysine, threonine, methionine, and cysteine |
| tdh   | SMD_0835 | 2,57 | 2,41 EC_1.1.1.103 | Amino Acids and Derivatives                      | Alanine, serine, and glycine                |

|       |          |      |      |                          |                                                  |                                                              |
|-------|----------|------|------|--------------------------|--------------------------------------------------|--------------------------------------------------------------|
| folC  | SMD_0838 | 2,80 | 2,97 | EC_6.3.2.12, EC_6.3.2.17 | Cofactors, Vitamins, Prosthetic Groups, Pigments | Folate and pterines                                          |
| folC  | SMD_0838 | 2,80 | 2,97 | EC_6.3.2.12, EC_6.3.2.17 | Virulence, Disease and Defense                   | Bacteriocins, ribosomally synthesized antibacterial peptides |
| purF  | SMD_0841 | 2,77 | 2,90 | EC_2.4.2.14              | Nucleosides and Nucleotides                      | Purines                                                      |
| purF  | SMD_0841 | 2,77 | 2,90 | EC_2.4.2.14              | Virulence, Disease and Defense                   | Bacteriocins, ribosomally synthesized antibacterial peptides |
| ppx   | SMD_0849 | 4,15 | 5,24 | EC_3.6.1.11              | Phosphorus Metabolism                            | Phosphorus Metabolism                                        |
| ppk   | SMD_0850 | 3,03 | 3,27 | EC_2.7.4.1               | Nucleosides and Nucleotides                      | Purines                                                      |
| ppk   | SMD_0850 | 3,03 | 3,27 | EC_2.7.4.1               | Phosphorus Metabolism                            | Phosphorus Metabolism                                        |
| -     | SMD_0856 | 2,07 | 2,38 | EC_1.1.1.41              | Carbohydrates                                    | Central carbohydrate metabolism                              |
| tig   | SMD_0869 | 2,85 | 2,94 | EC_5.2.1.8               | RNA Metabolism                                   | RNA processing and modification                              |
| clpP  | SMD_0870 | 2,56 | 2,62 | EC_3.4.21.92             | Protein Metabolism                               | Protein degradation                                          |
| clpP  | SMD_0870 | 2,56 | 2,62 | EC_3.4.21.92             | Regulation and Cell signaling                    | Regulation and Cell signaling                                |
| lon   | SMD_0872 | 2,06 | 2,61 | EC_3.4.21.53             | Protein Metabolism                               | Protein degradation                                          |
| ppiD  | SMD_0879 | 2,72 | 2,80 | EC_5.2.1.8               | Protein Metabolism                               | Protein folding                                              |
| mltD  | SMD_0933 | 4,61 | 5,30 | EC_3.2.1.-               | Cell Wall and Capsule                            | Cell Wall and Capsule                                        |
| gloB  | SMD_0934 | 5,04 | 6,16 | EC_3.1.2.6               | Carbohydrates                                    | Central carbohydrate metabolism                              |
| gloB  | SMD_0934 | 5,04 | 6,16 | EC_3.1.2.6               | Stress Response                                  | Oxidative stress                                             |
| -     | SMD_0935 | 3,43 | 3,37 | EC_2.1.1.-               | Stress Response                                  | Oxidative stress                                             |
| rnhA  | SMD_0936 | 2,94 | 3,28 | EC_3.1.26.4              | RNA Metabolism                                   | RNA processing and modification                              |
| dnaX  | SMD_0964 | 2,70 | 3,08 | EC_2.7.7.7               | DNA Metabolism                                   | DNA uptake, competence                                       |
| -     | SMD_0967 | 3,76 | 2,37 | EC_3.6.1.17              | Nucleosides and Nucleotides                      | Pyrimidines                                                  |
| fabH2 | SMD_0976 | 2,34 | 2,78 | EC_2.3.1.41              | Fatty Acids, Lipids, and Isoprenoids             | Fatty acids                                                  |
| fabD  | SMD_0978 | 3,06 | 3,08 | EC_2.3.1.39              | Carbohydrates                                    | Organic acids                                                |
| fabD  | SMD_0978 | 3,06 | 3,08 | EC_2.3.1.39              | Fatty Acids, Lipids, and Isoprenoids             | Fatty acids                                                  |
| fabG  | SMD_0979 | 2,72 | 2,89 | EC_1.1.1.100             | Fatty Acids, Lipids, and Isoprenoids             | Fatty acids                                                  |
| fabF  | SMD_0981 | 2,25 | 2,66 | EC_2.3.1.41              | Fatty Acids, Lipids, and Isoprenoids             | Fatty acids                                                  |
| proC  | SMD_1011 | 2,66 | 2,66 | EC_1.5.1.2               | Amino Acids and Derivatives                      | Proline and 4-hydroxyproline                                 |
| tag   | SMD_1019 | 3,75 | 3,19 | EC_3.2.2.20              | DNA Metabolism                                   | DNA repair                                                   |
| pyrB  | SMD_1023 | 3,07 | 2,95 | EC_2.1.3.2               | Nucleosides and Nucleotides                      | Pyrimidines                                                  |
| ptsl  | SMD_1027 | 2,81 | 2,69 | EC_2.7.3.9               | Carbohydrates                                    | Monosaccharides                                              |
| -     | SMD_1031 | 2,59 | 3,65 | EC_2.7.1.-               | Regulation and Cell signaling                    | Regulation and Cell signaling                                |
| kdsC  | SMD_1038 | 2,60 | 3,51 | EC_3.1.3.45              | Cell Wall and Capsule                            | Gram-Negative cell wall components                           |
| kdsD  | SMD_1039 | 3,01 | 3,62 | EC_5.3.1.13              | Cell Wall and Capsule                            | Gram-Negative cell wall components                           |
| murA  | SMD_1041 | 2,88 | 2,88 | EC_2.5.1.7               | Cell Wall and Capsule                            | Cell Wall and Capsule                                        |
| purN  | SMD_1045 | 3,46 | 3,38 | EC_2.1.2.2               | Cofactors, Vitamins, Prosthetic Groups, Pigments | Folate and pterines                                          |
| purN  | SMD_1045 | 3,46 | 3,38 | EC_2.1.2.2               | Nucleosides and Nucleotides                      | Purines                                                      |
| purM  | SMD_1049 | 3,48 | 3,64 | EC_6.3.3.1               | Nucleosides and Nucleotides                      | Purines                                                      |
| -     | SMD_1075 | 1,95 | 2,39 | EC_2.8.1.7               | Amino Acids and Derivatives                      | Alanine, serine, and glycine                                 |

|       |          |      |      |                         |                                                    |                                               |
|-------|----------|------|------|-------------------------|----------------------------------------------------|-----------------------------------------------|
| -     | SMD_1075 | 1,95 | 2,39 | EC_2.8.1.7              | Miscellaneous                                      | Plant-Prokaryote DOE project                  |
| -     | SMD_1075 | 1,95 | 2,39 | EC_2.8.1.7              | RNA Metabolism                                     | RNA processing and modification               |
| lysA  | SMD_1089 | 2,79 | 2,87 | EC_2.7.2.4, EC_4.1.1.20 | Amino Acids and Derivatives                        | Lysine, threonine, methionine, and cysteine   |
| murD  | SMD_1091 | 2,19 | 1,89 | EC_6.3.2.9              | Cell Wall and Capsule                              | Cell Wall and Capsule                         |
| ispB  | SMD_1096 | 3,51 | 2,98 | EC_2.5.1.1, EC_2.5.1.10 | Fatty Acids, Lipids, and Isoprenoids               | Isoprenoids                                   |
| -     | SMD_1143 | 2,29 | 2,83 | EC_3.2.2.1              | Nucleosides and Nucleotides                        | Purines                                       |
| -     | SMD_1143 | 2,29 | 2,83 | EC_3.2.2.1              | RNA Metabolism                                     | RNA processing and modification               |
| mgo   | SMD_1155 | 3,30 | 4,35 | EC_1.1.5.4              | Carbohydrates                                      | Central carbohydrate metabolism               |
| -     | SMD_1174 | 2,34 | 3,04 | EC_3.4.16.4             | Cell Wall and Capsule                              | Cell Wall and Capsule                         |
| -     | SMD_1174 | 2,34 | 3,04 | EC_3.4.16.4             | Protein Metabolism                                 | Protein degradation                           |
| tesB  | SMD_1185 | 2,71 | 3,79 | EC_3.1.2.-              | Fatty Acids, Lipids, and Isoprenoids               | Fatty acids                                   |
| -     | SMD_1186 | 2,02 | 2,82 | EC_4.2.1.17             | Amino Acids and Derivatives                        | Branched-chain amino acids                    |
| -     | SMD_1186 | 2,02 | 2,82 | EC_4.2.1.17             | Fatty Acids, Lipids, and Isoprenoids               | Fatty Acids, Lipids, and Isoprenoids          |
| -     | SMD_1188 | 2,52 | 2,31 | EC_4.2.1.11             | Carbohydrates                                      | Central carbohydrate metabolism               |
| -     | SMD_1188 | 2,52 | 2,31 | EC_4.2.1.11             | Carbohydrates                                      | One-carbon Metabolism                         |
| ribF  | SMD_1196 | 2,56 | 3,14 | EC_2.7.1.26, EC_2.7.7.2 | Cofactors, Vitamins, Prosthetic Groups, Pigments   | Riboflavin, FMN, FAD                          |
| ileS  | SMD_1197 | 2,39 | 2,29 | EC_6.1.1.5              | Protein Metabolism                                 | Protein biosynthesis                          |
| lspA  | SMD_1198 | 1,82 | 2,35 | EC_3.4.23.36            | Protein Metabolism                                 | Protein processing and modification           |
| ispH  | SMD_1199 | 2,20 | 2,24 | EC_1.17.1.2             | Fatty Acids, Lipids, and Isoprenoids               | Isoprenoids                                   |
| cyoA  | SMD_1213 | 2,45 | 2,22 | EC_1.10.3.-             | Respiration                                        | Electron accepting reactions                  |
| cyoB  | SMD_1214 | 2,19 | 2,09 | EC_1.10.3.-             | Respiration                                        | Electron accepting reactions                  |
| cyoC  | SMD_1215 | 2,14 | 1,99 | EC_1.10.3.-             | Respiration                                        | Electron accepting reactions                  |
| cyoD  | SMD_1216 | 1,73 | 2,28 | EC_1.10.3.-             | Respiration                                        | Electron accepting reactions                  |
| -     | SMD_1225 | 3,29 | 2,29 | EC_4.1.3.38             | Amino Acids and Derivatives                        | Aromatic amino acids and derivatives          |
| -     | SMD_1225 | 3,29 | 2,29 | EC_4.1.3.38             | Cofactors, Vitamins, Prosthetic Groups, Pigments   | Folate and pterines                           |
| katA2 | SMD_1237 | 3,18 | 3,60 | EC_1.11.1.6             | Stress Response                                    | Oxidative stress                              |
| nfi   | SMD_1267 | 3,72 | 5,10 | EC_3.1.21.7             | DNA Metabolism                                     | DNA repair                                    |
| gpmA  | SMD_1268 | 3,09 | 3,27 | EC_5.4.2.1              | Carbohydrates                                      | Central carbohydrate metabolism               |
| gpmA  | SMD_1268 | 3,09 | 3,27 | EC_5.4.2.1              | Miscellaneous                                      | Miscellaneous                                 |
| gltX  | SMD_1279 | 2,43 | 2,92 | EC_6.1.1.17             | Cofactors, Vitamins, Prosthetic Groups, Pigments   | Tetrapyrroles                                 |
| gltX  | SMD_1279 | 2,43 | 2,92 | EC_6.1.1.17             | Protein Metabolism                                 | Protein biosynthesis                          |
| -     | SMD_1293 | 2,94 | 3,36 | EC_1.14.13.-            | Cofactors, Vitamins, Prosthetic Groups, Pigments   | Quinone cofactors                             |
| -     | SMD_1305 | 3,57 | 3,33 | EC_3.5.2.6              | Virulence, Disease and Defense                     | Resistance to antibiotics and toxic compounds |
| accA  | SMD_1321 | 2,20 | 2,24 | EC_6.4.1.2              | Fatty Acids, Lipids, and Isoprenoids               | Fatty acids                                   |
| dnaE  | SMD_1323 | 2,40 | 2,61 | EC_2.7.7.7              | Phages, Prophages, Transposable elements, Plasmids | Phages, Prophages                             |
| rrhB  | SMD_1324 | 2,43 | 2,19 | EC_3.1.26.4             | RNA Metabolism                                     | RNA processing and modification               |
| lpxB  | SMD_1325 | 2,38 | 2,60 | EC_2.4.1.182            | Cell Wall and Capsule                              | Gram-Negative cell wall components            |

|      |          |      |      |              |                                                  |                                               |
|------|----------|------|------|--------------|--------------------------------------------------|-----------------------------------------------|
| lpxA | SMD_1326 | 2,22 | 2,44 | EC_2.3.1.129 | Cell Wall and Capsule                            | Gram-Negative cell wall components            |
| fabZ | SMD_1327 | 2,46 | 2,46 | EC_4.2.1.-   | Fatty Acids, Lipids, and Isoprenoids             | Fatty acids                                   |
| lpxD | SMD_1328 | 2,24 | 2,68 | EC_2.3.1.-   | Cell Wall and Capsule                            | Gram-Negative cell wall components            |
| dxr  | SMD_1331 | 2,01 | 2,35 | EC_1.1.1.267 | Fatty Acids, Lipids, and Isoprenoids             | Isoprenoids                                   |
| cdsA | SMD_1332 | 2,40 | 2,62 | EC_2.7.7.41  | Fatty Acids, Lipids, and Isoprenoids             | Phospholipids                                 |
| uppS | SMD_1333 | 2,49 | 2,42 | EC_2.5.1.31  | Fatty Acids, Lipids, and Isoprenoids             | Isoprenoids                                   |
| map  | SMD_1345 | 2,41 | 2,24 | EC_3.4.11.18 | Protein Metabolism                               | Protein biosynthesis                          |
| glnD | SMD_1346 | 2,44 | 2,63 | EC_2.7.7.59  | Nitrogen Metabolism                              | Nitrogen Metabolism                           |
| dapD | SMD_1347 | 2,12 | 1,98 | EC_2.3.1.117 | Amino Acids and Derivatives                      | Lysine, threonine, methionine, and cysteine   |
| dapE | SMD_1350 | 2,42 | 2,34 | EC_3.5.1.18  | Amino Acids and Derivatives                      | Lysine, threonine, methionine, and cysteine   |
| parC | SMD_1356 | 2,44 | 2,55 | EC_5.99.1.-  | DNA Metabolism                                   | DNA replication                               |
| parC | SMD_1356 | 2,44 | 2,55 | EC_5.99.1.-  | Virulence, Disease and Defense                   | Resistance to antibiotics and toxic compounds |
| rnt  | SMD_1375 | 3,51 | 3,54 | EC_3.1.13.-  | RNA Metabolism                                   | RNA processing and modification               |
| nth  | SMD_1387 | 1,52 | 1,39 | EC_4.2.99.18 | DNA Metabolism                                   | DNA repair                                    |
| crt2 | SMD_1389 | 3,48 | 3,09 | EC_4.2.1.17  | Amino Acids and Derivatives                      | Branched-chain amino acids                    |
| crt2 | SMD_1389 | 3,48 | 3,09 | EC_4.2.1.17  | Fatty Acids, Lipids, and Isoprenoids             | Fatty Acids, Lipids, and Isoprenoids          |
| nadC | SMD_1437 | 2,30 | 2,89 | EC_2.4.2.19  | Cofactors, Vitamins, Prosthetic Groups, Pigments | NAD and NADP                                  |
| purE | SMD_1439 | 2,75 | 3,85 | EC_4.1.1.21  | Nucleosides and Nucleotides                      | Purines                                       |
| purK | SMD_1440 | 2,51 | 3,03 | EC_4.1.1.21  | Nucleosides and Nucleotides                      | Purines                                       |
| lpxK | SMD_1467 | 2,10 | 2,06 | EC_2.7.1.130 | Cell Wall and Capsule                            | Gram-Negative cell wall components            |
| kdsB | SMD_1468 | 2,28 | 2,10 | EC_2.7.7.38  | Cell Wall and Capsule                            | Gram-Negative cell wall components            |
| pgsA | SMD_1472 | 2,31 | 2,27 | EC_2.7.8.5   | Fatty Acids, Lipids, and Isoprenoids             | Phospholipids                                 |
| pgsA | SMD_1472 | 2,31 | 2,27 | EC_2.7.8.5   | Regulation and Cell signaling                    | Regulation of virulence                       |
| -    | SMD_1583 | 2,15 | 2,57 | EC_2.8.1.7   | Amino Acids and Derivatives                      | Alanine, serine, and glycine                  |
| -    | SMD_1583 | 2,15 | 2,57 | EC_2.8.1.7   | Miscellaneous                                    | Plant-Prokaryote DOE project                  |
| -    | SMD_1583 | 2,15 | 2,57 | EC_2.8.1.7   | RNA Metabolism                                   | RNA processing and modification               |
| -    | SMD_1634 | 2,34 | 3,25 | EC_1.4.1.13  | Nitrogen Metabolism                              | Nitrogen Metabolism                           |
| parE | SMD_1648 | 2,00 | 2,44 | EC_5.99.1.-  | DNA Metabolism                                   | DNA replication                               |
| parE | SMD_1648 | 2,00 | 2,44 | EC_5.99.1.-  | Virulence, Disease and Defense                   | Resistance to antibiotics and toxic compounds |
| pyrG | SMD_1651 | 2,75 | 2,40 | EC_6.3.4.2   | Nucleosides and Nucleotides                      | Pyrimidines                                   |
| kdsA | SMD_1652 | 2,64 | 2,85 | EC_2.5.1.55  | Cell Wall and Capsule                            | Gram-Negative cell wall components            |
| eno  | SMD_1655 | 2,60 | 2,81 | EC_4.2.1.11  | Carbohydrates                                    | One-carbon Metabolism                         |
| eno  | SMD_1655 | 2,60 | 2,81 | EC_4.2.1.11  | Carbohydrates                                    | Central carbohydrate metabolism               |
| ispD | SMD_1657 | 2,14 | 2,54 | EC_2.7.7.60  | Fatty Acids, Lipids, and Isoprenoids             | Isoprenoids                                   |
| ispF | SMD_1658 | 1,79 | 2,34 | EC_4.6.1.12  | Fatty Acids, Lipids, and Isoprenoids             | Isoprenoids                                   |
| truD | SMD_1659 | 2,30 | 1,98 | EC_4.2.1.-   | RNA Metabolism                                   | RNA processing and modification               |
| surE | SMD_1661 | 2,99 | 3,24 | EC_3.1.3.5   | Nucleosides and Nucleotides                      | Purines                                       |

|      |          |      |                   |                                                  |                                             |
|------|----------|------|-------------------|--------------------------------------------------|---------------------------------------------|
| surE | SMD_1661 | 2,99 | 3,24 EC_3.1.3.5   | Nucleosides and Nucleotides                      | Detoxification                              |
| surE | SMD_1661 | 2,99 | 3,24 EC_3.1.3.5   | Nucleosides and Nucleotides                      | Pyrimidines                                 |
| pcm  | SMD_1662 | 3,10 | 2,17 EC_2.1.1.77  | Membrane Transport                               | Membrane Transport                          |
| pcm  | SMD_1662 | 3,10 | 2,17 EC_2.1.1.77  | Protein Metabolism                               | Protein processing and modification         |
| pcm  | SMD_1662 | 3,10 | 2,17 EC_2.1.1.77  | Secondary Metabolism                             | Secondary Metabolism                        |
| ftsH | SMD_1669 | 2,48 | 3,02 EC_3.4.24.-  | Cofactors, Vitamins, Prosthetic Groups, Pigments | Folate and pterines                         |
| folP | SMD_1671 | 2,49 | 2,67 EC_2.5.1.15  | Cofactors, Vitamins, Prosthetic Groups, Pigments | Folate and pterines                         |
| lexA | SMD_1677 | 3,98 | 5,66 EC_3.4.21.88 | DNA Metabolism                                   | DNA repair                                  |
| alaS | SMD_1680 | 2,73 | 2,81 EC_6.1.1.7   | Protein Metabolism                               | Protein biosynthesis                        |
| -    | SMD_1707 | 1,51 | 2,75 EC_1.11.1.15 | Sulfur Metabolism                                | Sulfur Metabolism                           |
| dapA | SMD_1709 | 3,31 | 3,46 EC_4.3.3.7   | Amino Acids and Derivatives                      | Lysine, threonine, methionine, and cysteine |
| pcnB | SMD_1714 | 2,72 | 2,65 EC_2.7.7.19  | RNA Metabolism                                   | RNA processing and modification             |
| folK | SMD_1715 | 1,52 | 2,96 EC_2.7.6.3   | Cofactors, Vitamins, Prosthetic Groups, Pigments | Folate and pterines                         |
| panB | SMD_1716 | 2,68 | 2,49 EC_2.1.2.11  | Cofactors, Vitamins, Prosthetic Groups, Pigments | Coenzyme A                                  |
| panC | SMD_1717 | 2,78 | 2,60 EC_6.3.2.1   | Cofactors, Vitamins, Prosthetic Groups, Pigments | Folate and pterines                         |
| panC | SMD_1717 | 2,78 | 2,60 EC_6.3.2.1   | Cofactors, Vitamins, Prosthetic Groups, Pigments | Coenzyme A                                  |
| panD | SMD_1718 | 2,62 | 2,72 EC_4.1.1.11  | Cofactors, Vitamins, Prosthetic Groups, Pigments | Folate and pterines                         |
| panD | SMD_1718 | 2,62 | 2,72 EC_4.1.1.11  | Cofactors, Vitamins, Prosthetic Groups, Pigments | Coenzyme A                                  |
| pgi  | SMD_1719 | 2,46 | 2,71 EC_5.3.1.9   | Carbohydrates                                    | Central carbohydrate metabolism             |
| -    | SMD_1721 | 3,42 | 4,85 EC_2.7.3.-   | Regulation and Cell signaling                    | Regulation and Cell signaling               |
| ispG | SMD_1722 | 2,33 | 3,74 EC_1.17.7.1  | Fatty Acids, Lipids, and Isoprenoids             | Isoprenoids                                 |
| kgdA | SMD_1725 | 1,70 | 2,37 EC_4.1.2.14  | Carbohydrates                                    | Central carbohydrate metabolism             |
| edd  | SMD_1726 | 2,33 | 2,28 EC_4.2.1.12  | Carbohydrates                                    | Central carbohydrate metabolism             |
| zwf  | SMD_1729 | 3,30 | 3,15 EC_1.1.1.49  | Carbohydrates                                    | Central carbohydrate metabolism             |
| sdhA | SMD_1734 | 2,22 | 2,47 EC_1.3.99.1  | Carbohydrates                                    | Central carbohydrate metabolism             |
| sdhA | SMD_1734 | 2,22 | 2,47 EC_1.3.99.1  | Respiration                                      | Electron donating reactions                 |
| sdhB | SMD_1735 | 1,97 | 1,92 EC_1.3.99.1  | Carbohydrates                                    | Central carbohydrate metabolism             |
| sdhB | SMD_1735 | 1,97 | 1,92 EC_1.3.99.1  | Carbohydrates                                    | One-carbon Metabolism                       |
| sdhB | SMD_1735 | 1,97 | 1,92 EC_1.3.99.1  | Cofactors, Vitamins, Prosthetic Groups, Pigments | Folate and pterines                         |
| coaD | SMD_1747 | 2,86 | 3,10 EC_2.7.7.3   | Cofactors, Vitamins, Prosthetic Groups, Pigments | Coenzyme A                                  |
| ggt  | SMD_1750 | 2,38 | 2,35 EC_2.3.2.2   | Stress Response                                  | Oxidative stress                            |
| -    | SMD_1754 | 3,01 | 3,77 EC_2.5.1.18  | Stress Response                                  | Oxidative stress                            |
| upp  | SMD_1755 | 2,87 | 2,95 EC_2.4.2.9   | Nucleosides and Nucleotides                      | Pyrimidines                                 |
| pdxK | SMD_1798 | 2,95 | 2,84 EC_2.7.1.35  | Cofactors, Vitamins, Prosthetic Groups, Pigments | Pyridoxine                                  |
| queA | SMD_1808 | 3,11 | 3,06 EC_5.-.-.-   | Miscellaneous                                    | Plant-Prokaryote DOE project                |
| queA | SMD_1808 | 3,11 | 3,06 EC_5.-.-.-   | RNA Metabolism                                   | RNA processing and modification             |
| tgt  | SMD_1809 | 2,83 | 2,61 EC_2.4.2.29  | Miscellaneous                                    | Plant-Prokaryote DOE project                |

|      |          |      |                               |                                                  |                                               |
|------|----------|------|-------------------------------|--------------------------------------------------|-----------------------------------------------|
| tgt  | SMD_1809 | 2,83 | 2,61 EC_2.4.2.29              | RNA Metabolism                                   | RNA processing and modification               |
| apt  | SMD_1822 | 1,99 | 2,53 EC_2.4.2.7               | Nucleosides and Nucleotides                      | Purines                                       |
| apt  | SMD_1822 | 1,99 | 2,53 EC_2.4.2.7               | Regulation and Cell signaling                    | Regulation and Cell signaling                 |
| -    | SMD_1846 | 2,27 | 2,00 EC_2.3.1.16              | Amino Acids and Derivatives                      | Branched-chain amino acids                    |
| -    | SMD_1846 | 2,27 | 2,00 EC_2.3.1.16, EC_2.3.1.9  | Carbohydrates                                    | One-carbon Metabolism                         |
| -    | SMD_1846 | 2,27 | 2,00 EC_2.3.1.9               | Carbohydrates                                    | Fermentation                                  |
| -    | SMD_1846 | 2,27 | 2,00 EC_2.3.1.16              | Cofactors, Vitamins, Prosthetic Groups, Pigments | Biotin                                        |
| -    | SMD_1846 | 2,27 | 2,00 EC_2.3.1.16, EC_2.3.1.9  | Fatty Acids, Lipids, and Isoprenoids             | Fatty Acids, Lipids, and Isoprenoids          |
| -    | SMD_1846 | 2,27 | 2,00 EC_2.3.1.9               | Fatty Acids, Lipids, and Isoprenoids             | Isoprenoids                                   |
| -    | SMD_1847 | 1,82 | 2,25 EC_1.1.1.35, EC_4.2.1.17 | Amino Acids and Derivatives                      | Branched-chain amino acids                    |
| -    | SMD_1847 | 1,82 | 2,25 EC_1.1.1.35              | Carbohydrates                                    | Fermentation                                  |
| -    | SMD_1847 | 1,82 | 2,25 EC_1.1.1.35              | Fatty Acids, Lipids, and Isoprenoids             | Fatty acids                                   |
| -    | SMD_1847 | 1,82 | 2,25 EC_4.2.1.17              | Fatty Acids, Lipids, and Isoprenoids             | Fatty Acids, Lipids, and Isoprenoids          |
| ndk  | SMD_1849 | 2,49 | 2,51 EC_2.7.4.6               | Nucleosides and Nucleotides                      | Pyrimidines                                   |
| ndk  | SMD_1849 | 2,49 | 2,51 EC_2.7.4.6               | Nucleosides and Nucleotides                      | Purines                                       |
| rlmN | SMD_1850 | 2,14 | 2,65 EC_2.1.1.-               | RNA Metabolism                                   | RNA processing and modification               |
| folD | SMD_1858 | 2,76 | 2,93 EC_1.5.1.5, EC_3.5.4.9   | Carbohydrates                                    | One-carbon Metabolism                         |
| folD | SMD_1858 | 2,76 | 2,93 EC_1.5.1.5               | Cofactors, Vitamins, Prosthetic Groups, Pigments | Folate and pterines                           |
| guaB | SMD_1859 | 2,60 | 3,14 EC_1.1.1.205             | Nucleosides and Nucleotides                      | Purines                                       |
| guaA | SMD_1861 | 2,02 | 2,19 EC_6.3.5.2               | Nucleosides and Nucleotides                      | Purines                                       |
| hsdR | SMD_1862 | 2,72 | 3,13 EC_3.1.21.3              | DNA Metabolism                                   | DNA Metabolism                                |
| hsdM | SMD_1863 | 2,22 | 2,26 EC_2.1.1.72              | DNA Metabolism                                   | DNA Metabolism                                |
| hsdS | SMD_1864 | 1,84 | 1,85 EC_3.1.21.3              | DNA Metabolism                                   | DNA Metabolism                                |
| pyrD | SMD_1915 | 2,73 | 2,65 EC_1.3.98.1              | Carbohydrates                                    | One-carbon Metabolism                         |
| -    | SMD_1918 | 2,48 | 2,17 EC_1.1.1.100             | Fatty Acids, Lipids, and Isoprenoids             | Fatty acids                                   |
| -    | SMD_1919 | 2,40 | 2,32 EC_1.2.1.22              | Carbohydrates                                    | Central carbohydrate metabolism               |
| -    | SMD_1919 | 2,40 | 2,32 EC_1.2.1.22              | Fatty Acids, Lipids, and Isoprenoids             | Phospholipids                                 |
| -    | SMD_1934 | 2,20 | 3,26 EC_3.5.1.24              | Virulence, Disease and Defense                   | Resistance to antibiotics and toxic compounds |
| thrB | SMD_1940 | 2,29 | 2,74 EC_2.7.1.39              | Amino Acids and Derivatives                      | Lysine, threonine, methionine, and cysteine   |
| thrC | SMD_1941 | 2,96 | 2,96 EC_4.2.3.1               | Amino Acids and Derivatives                      | Lysine, threonine, methionine, and cysteine   |
| hisS | SMD_1943 | 2,63 | 2,73 EC_6.1.1.21              | Protein Metabolism                               | Protein biosynthesis                          |
| hisB | SMD_1949 | 1,43 | 1,76 EC_4.2.1.19, EC_3.1.3.15 | Amino Acids and Derivatives                      | Histidine Metabolism                          |
| hisA | SMD_1951 | 2,35 | 1,80 EC_5.3.1.16              | Amino Acids and Derivatives                      | Histidine Metabolism                          |
| hisA | SMD_1951 | 2,35 | 1,80 EC_5.3.1.16              | Amino Acids and Derivatives                      | Aromatic amino acids and derivatives          |
| hisF | SMD_1952 | 2,50 | 1,52 EC_4.1.3.-               | Amino Acids and Derivatives                      | Histidine Metabolism                          |
| -    | SMD_1956 | 2,31 | 2,99 EC_2.7.1.59              | Carbohydrates                                    | Aminosugars                                   |
| actP | SMD_1960 | 1,99 | 2,87 EC_3.6.3.4               | Membrane Transport                               | Cation transporters                           |

|       |          |      |      |                         |                                                  |                                               |
|-------|----------|------|------|-------------------------|--------------------------------------------------|-----------------------------------------------|
| actP  | SMD_1960 | 1,99 | 2,87 | EC_3.6.3.4              | Virulence, Disease and Defense                   | Resistance to antibiotics and toxic compounds |
| scrK  | SMD_1967 | 2,04 | 2,04 | EC_2.7.1.4              | Carbohydrates                                    | Monosaccharides                               |
| -     | SMD_1968 | 2,01 | 1,86 | EC_5.3.1.7              | Carbohydrates                                    | Monosaccharides                               |
| bmnA  | SMD_1969 | 2,28 | 2,06 | EC_3.2.1.25             | Carbohydrates                                    | Monosaccharides                               |
| masA  | SMD_1970 | 2,92 | 2,31 | EC_3.1.3.77             | Amino Acids and Derivatives                      | Lysine, threonine, methionine, and cysteine   |
| mtnD  | SMD_1971 | 3,29 | 2,62 | EC_1.13.11.54           | Amino Acids and Derivatives                      | Lysine, threonine, methionine, and cysteine   |
| mtnB  | SMD_1972 | 2,54 | 3,03 | EC_4.2.1.109            | Amino Acids and Derivatives                      | Lysine, threonine, methionine, and cysteine   |
| serA  | SMD_1976 | 2,80 | 3,12 | EC_1.1.1.95             | Amino Acids and Derivatives                      | Alanine, serine, and glycine                  |
| serA  | SMD_1976 | 2,80 | 3,12 | EC_1.1.1.95             | Cofactors, Vitamins, Prosthetic Groups, Pigments | Pyridoxine                                    |
| hmgcl | SMD_1988 | 2,55 | 2,96 | EC_4.1.3.4              | Amino Acids and Derivatives                      | Branched-chain amino acids                    |
| -     | SMD_1990 | 1,44 | 2,28 | EC_4.2.1.18             | Amino Acids and Derivatives                      | Branched-chain amino acids                    |
| dapB  | SMD_1998 | 2,37 | 2,32 | EC_1.17.1.8             | Amino Acids and Derivatives                      | Lysine, threonine, methionine, and cysteine   |
| carA  | SMD_1999 | 2,78 | 2,86 | EC_6.3.5.5              | Cell Division and Cell Cycle                     | Cell Division and Cell Cycle                  |
| carA  | SMD_1999 | 2,78 | 2,86 | EC_6.3.5.5              | Nucleosides and Nucleotides                      | Pyrimidines                                   |
| carB  | SMD_2000 | 2,11 | 2,36 | EC_6.3.5.5              | Cell Division and Cell Cycle                     | Cell Division and Cell Cycle                  |
| carB  | SMD_2000 | 2,11 | 2,36 | EC_6.3.5.5              | Nucleosides and Nucleotides                      | Pyrimidines                                   |
| recJ  | SMD_2004 | 3,06 | 3,08 | EC_3.1.-.-              | DNA Metabolism                                   | DNA repair                                    |
| lysS  | SMD_2013 | 2,67 | 2,66 | EC_6.1.1.6              | Protein Metabolism                               | Protein biosynthesis                          |
| fadD  | SMD_2017 | 2,97 | 3,55 | EC_6.2.1.3              | Cofactors, Vitamins, Prosthetic Groups, Pigments | Biotin                                        |
| fadD  | SMD_2017 | 2,97 | 3,55 | EC_6.2.1.3              | Fatty Acids, Lipids, and Isoprenoids             | Fatty acids                                   |
| betA  | SMD_2018 | 2,84 | 2,85 | EC_1.1.99.1             | Stress Response                                  | Osmotic stress                                |
| acn   | SMD_2022 | 2,49 | 2,57 | EC_4.2.1.3              | Carbohydrates                                    | Central carbohydrate metabolism               |
| acn   | SMD_2022 | 2,49 | 2,57 | EC_4.2.1.3              | Carbohydrates                                    | One-carbon Metabolism                         |
| acn   | SMD_2022 | 2,49 | 2,57 | EC_4.2.1.3, EC_4.2.1.99 | Carbohydrates                                    | Organic acids                                 |
| acnB  | SMD_2025 | 2,27 | 2,28 | EC_4.2.1.3              | Carbohydrates                                    | Central carbohydrate metabolism               |
| acnB  | SMD_2025 | 2,27 | 2,28 | EC_4.2.1.3, EC_4.2.1.99 | Carbohydrates                                    | Organic acids                                 |
| cheA  | SMD_2036 | 2,30 | 2,47 | EC_2.7.3.-              | Motility and Chemotaxis                          | Flagellar motility in Prokaryota              |
| cheA2 | SMD_2043 | 2,36 | 2,29 | EC_2.7.3.-              | Motility and Chemotaxis                          | Motility and Chemotaxis                       |
| trxB  | SMD_2112 | 2,85 | 2,50 | EC_1.8.1.9              | Nucleosides and Nucleotides                      | Pyrimidines                                   |
| trxB  | SMD_2112 | 2,85 | 2,50 | EC_1.8.1.9              | Sulfur Metabolism                                | Sulfur Metabolism                             |
| lspA2 | SMD_2136 | 1,14 | 1,34 | EC_3.4.23.36            | Protein Metabolism                               | Protein processing and modification           |
| -     | SMD_2165 | 2,51 | 3,17 | EC_2.7.3.-              | Stress Response                                  | Oxidative stress                              |
| -     | SMD_2220 | 2,18 | 1,70 | EC_3.3.2.1              | Amino Acids and Derivatives                      | Aromatic amino acids and derivatives          |
| -     | SMD_2220 | 2,18 | 1,70 | EC_3.3.2.1              | Cofactors, Vitamins, Prosthetic Groups, Pigments | NAD and NADP                                  |
| -     | SMD_2225 | 2,09 | 2,72 | EC_2.7.3.9              | Carbohydrates                                    | Monosaccharides                               |
| fruK  | SMD_2226 | 1,31 | 1,57 | EC_2.7.1.56             | Carbohydrates                                    | Monosaccharides                               |
| fruA  | SMD_2227 | 2,04 | 2,61 | EC_2.7.1.69             | Carbohydrates                                    | Monosaccharides                               |

|       |          |      |      |                          |                                                  |                                               |
|-------|----------|------|------|--------------------------|--------------------------------------------------|-----------------------------------------------|
| metE  | SMD_2261 | 4,69 | 3,83 | EC_2.1.1.14              | Amino Acids and Derivatives                      | Lysine, threonine, methionine, and cysteine   |
| sodA2 | SMD_2474 | 3,88 | 2,74 | EC_1.15.1.1              | Stress Response                                  | Oxidative stress                              |
| cdh   | SMD_2539 | 3,59 | 1,92 | EC_3.6.1.26              | Fatty Acids, Lipids, and Isoprenoids             | Phospholipids                                 |
| dld   | SMD_2543 | 1,93 | 2,08 | EC_1.1.2.5               | Carbohydrates                                    | Organic acids                                 |
| dld   | SMD_2543 | 1,93 | 2,08 | EC_1.1.2.5               | Respiration                                      | Electron donating reactions                   |
| lctD  | SMD_2544 | 1,91 | 2,23 | EC_1.1.2.3               | Carbohydrates                                    | Organic acids                                 |
| lctD  | SMD_2544 | 1,91 | 2,23 | EC_1.1.2.3               | Respiration                                      | Electron donating reactions                   |
| adi   | SMD_2577 | 2,52 | 3,87 | EC_4.1.1.18              | Amino Acids and Derivatives                      | Lysine, threonine, methionine, and cysteine   |
| pssA2 | SMD_2607 | 3,31 | 2,30 | EC_2.7.8.8               | Fatty Acids, Lipids, and Isoprenoids             | Phospholipids                                 |
| pps   | SMD_2613 | 2,94 | 2,96 | EC_2.7.9.2               | Carbohydrates                                    | Central carbohydrate metabolism               |
| -     | SMD_2620 | 3,21 | 4,45 | EC_1.6.99.-              | Cofactors, Vitamins, Prosthetic Groups, Pigments | Riboflavin, FMN, FAD                          |
| serS  | SMD_2677 | 3,04 | 3,07 | EC_6.1.1.11              | Amino Acids and Derivatives                      | Alanine, serine, and glycine                  |
| serS  | SMD_2677 | 3,04 | 3,07 | EC_6.1.1.11              | Protein Metabolism                               | Protein biosynthesis                          |
| aroA  | SMD_2680 | 2,59 | 2,65 | EC_2.5.1.19              | Amino Acids and Derivatives                      | Aromatic amino acids and derivatives          |
| pheA  | SMD_2681 | 2,63 | 2,85 | EC_4.2.1.51, EC_5.4.99.5 | Amino Acids and Derivatives                      | Aromatic amino acids and derivatives          |
| serC  | SMD_2682 | 3,17 | 3,57 | EC_2.6.1.52              | Amino Acids and Derivatives                      | Alanine, serine, and glycine                  |
| serC  | SMD_2682 | 3,17 | 3,57 | EC_2.6.1.52              | Cofactors, Vitamins, Prosthetic Groups, Pigments | Pyridoxine                                    |
| hutH  | SMD_2691 | 3,58 | 3,05 | EC_4.3.1.3               | Amino Acids and Derivatives                      | Histidine Metabolism                          |
| -     | SMD_2713 | 2,56 | 2,68 | EC_1.6.5.5               | Respiration                                      | Respiration                                   |
| gyrA  | SMD_2717 | 2,67 | 2,97 | EC_5.99.1.3              | DNA Metabolism                                   | DNA replication                               |
| gyrA  | SMD_2717 | 2,67 | 2,97 | EC_5.99.1.3              | Virulence, Disease and Defense                   | Resistance to antibiotics and toxic compounds |
| mtnA  | SMD_2718 | 2,70 | 3,96 | EC_5.3.1.23              | Amino Acids and Derivatives                      | Lysine, threonine, methionine, and cysteine   |
| -     | SMD_2723 | 2,82 | 3,97 | EC_2.6.1.57              | Amino Acids and Derivatives                      | Aromatic amino acids and derivatives          |
| asnC  | SMD_2731 | 2,87 | 2,88 | EC_6.1.1.22              | Protein Metabolism                               | Protein biosynthesis                          |
| -     | SMD_2735 | 2,17 | 2,82 | EC_4.2.1.1               | Regulation and Cell signaling                    | Regulation and Cell signaling                 |
| nbaC  | SMD_2736 | 2,06 | 2,24 | EC_1.13.11.6             | Cofactors, Vitamins, Prosthetic Groups, Pigments | NAD and NADP                                  |
| -     | SMD_2737 | 2,64 | 2,83 | EC_3.7.1.3               | Cofactors, Vitamins, Prosthetic Groups, Pigments | NAD and NADP                                  |
| sbcB  | SMD_2739 | 2,31 | 2,50 | EC_3.1.11.1              | DNA Metabolism                                   | DNA repair                                    |
| -     | SMD_2743 | 2,90 | 3,33 | EC_3.1.3.5               | Nucleosides and Nucleotides                      | Pyrimidines                                   |
| -     | SMD_2743 | 2,90 | 3,33 | EC_3.1.3.5               | Nucleosides and Nucleotides                      | Purines                                       |
| -     | SMD_2744 | 2,76 | 2,78 | EC_2.7.1.23              | Cofactors, Vitamins, Prosthetic Groups, Pigments | NAD and NADP                                  |
| metH2 | SMD_2753 | 3,25 | 3,05 | EC_2.1.1.13              | Amino Acids and Derivatives                      | Lysine, threonine, methionine, and cysteine   |
| metH  | SMD_2754 | 2,42 | 2,55 | EC_2.1.1.13              | Amino Acids and Derivatives                      | Lysine, threonine, methionine, and cysteine   |
| -     | SMD_2760 | 2,92 | 1,99 | EC_5.2.1.8               | Protein Metabolism                               | Protein folding                               |
| fumC  | SMD_2769 | 3,05 | 3,12 | EC_4.2.1.2               | Carbohydrates                                    | Central carbohydrate metabolism               |
| purB  | SMD_2770 | 3,24 | 3,13 | EC_4.3.2.2               | Nucleosides and Nucleotides                      | Purines                                       |
| sucA  | SMD_2774 | 2,38 | 2,31 | EC_1.2.4.2               | Carbohydrates                                    | Central carbohydrate metabolism               |



|       |          |      |      |              |                                                  |                                                  |
|-------|----------|------|------|--------------|--------------------------------------------------|--------------------------------------------------|
| sucB  | SMD_2775 | 2,21 | 2,02 | EC_2.3.1.61  | Carbohydrates                                    | Central carbohydrate metabolism                  |
| odhL  | SMD_2776 | 1,99 | 1,90 | EC_1.8.1.4   | Carbohydrates                                    | Central carbohydrate metabolism                  |
| -     | SMD_2796 | 2,96 | 2,64 | EC_3.1.1.32  | Fatty Acids, Lipids, and Isoprenoids             | Triacylglycerols                                 |
| gst4  | SMD_2798 | 4,24 | 3,06 | EC_2.5.1.18  | Stress Response                                  | Oxidative stress                                 |
| -     | SMD_2800 | 2,57 | 2,44 | EC_4.2.1.2   | Carbohydrates                                    | Central carbohydrate metabolism                  |
| -     | SMD_2800 | 2,57 | 2,44 | EC_4.2.1.2   | Carbohydrates                                    | One-carbon Metabolism                            |
| fpr   | SMD_2804 | 3,01 | 2,63 | EC_1.18.1.2  | Respiration                                      | Respiration                                      |
| -     | SMD_2806 | 2,84 | 2,50 | EC_3.4.15.5  | Protein Metabolism                               | Protein degradation                              |
| sodA  | SMD_2814 | 2,98 | 3,06 | EC_1.15.1.1  | Stress Response                                  | Oxidative stress                                 |
| rluC  | SMD_2822 | 2,45 | 3,00 | EC_4.2.1.70  | Protein Metabolism                               | Protein biosynthesis                             |
| rluC  | SMD_2822 | 2,45 | 3,00 | EC_4.2.1.70  | RNA Metabolism                                   | RNA processing and modification                  |
| rnE   | SMD_2823 | 2,48 | 2,71 | EC_3.1.26.12 | Protein Metabolism                               | Protein biosynthesis                             |
| rnE   | SMD_2823 | 2,48 | 2,71 | EC_3.1.26.12 | RNA Metabolism                                   | RNA processing and modification                  |
| rluB  | SMD_2836 | 2,52 | 2,48 | EC_4.2.1.70  | RNA Metabolism                                   | RNA processing and modification                  |
| metX  | SMD_2851 | 3,27 | 3,43 | EC_2.3.1.31  | Amino Acids and Derivatives                      | Lysine, threonine, methionine, and cysteine      |
| cydA  | SMD_2855 | 2,61 | 2,20 | EC_1.10.3.-  | Respiration                                      | Electron accepting reactions                     |
| cydB  | SMD_2856 | 1,91 | 1,88 | EC_1.10.3.-  | Respiration                                      | Electron accepting reactions                     |
| proA  | SMD_2865 | 2,72 | 2,34 | EC_1.2.1.41  | Amino Acids and Derivatives                      | Proline and 4-hydroxyproline                     |
| proB  | SMD_2866 | 1,92 | 2,23 | EC_2.7.2.11  | Amino Acids and Derivatives                      | Proline and 4-hydroxyproline                     |
| cysS  | SMD_2877 | 3,21 | 2,97 | EC_6.1.1.16  | Protein Metabolism                               | Protein biosynthesis                             |
| cysS  | SMD_2877 | 3,21 | 2,97 | EC_6.1.1.16  | Regulation and Cell signaling                    | Regulation and Cell signaling                    |
| pyrC  | SMD_2882 | 2,61 | 2,77 | EC_3.5.2.3   | Nucleosides and Nucleotides                      | Pyrimidines                                      |
| pyrC  | SMD_2882 | 2,61 | 2,77 | EC_3.5.2.3   | Regulation and Cell signaling                    | Regulation and Cell signaling                    |
| amiC  | SMD_2901 | 3,93 | 4,47 | EC_3.5.1.28  | Cell Wall and Capsule                            | Cell Wall and Capsule                            |
| amiC  | SMD_2901 | 3,93 | 4,47 | EC_3.5.1.28  | Regulation and Cell signaling                    | Regulation and Cell signaling                    |
| ex7L  | SMD_2905 | 2,79 | 3,03 | EC_3.1.11.6  | DNA Metabolism                                   | DNA repair                                       |
| dxs   | SMD_2922 | 2,76 | 3,64 | EC_2.2.1.7   | Cofactors, Vitamins, Prosthetic Groups, Pigments | Cofactors, Vitamins, Prosthetic Groups, Pigments |
| dxs   | SMD_2922 | 2,76 | 3,64 | EC_2.2.1.7   | Cofactors, Vitamins, Prosthetic Groups, Pigments | Pyridoxine                                       |
| dxs   | SMD_2922 | 2,76 | 3,64 | EC_2.2.1.7   | Fatty Acids, Lipids, and Isoprenoids             | Isoprenoids                                      |
| pheT  | SMD_2947 | 2,51 | 2,69 | EC_6.1.1.20  | Protein Metabolism                               | Protein biosynthesis                             |
| pheS  | SMD_2948 | 2,93 | 3,60 | EC_6.1.1.20  | Protein Metabolism                               | Protein biosynthesis                             |
| thrS  | SMD_2952 | 2,66 | 2,79 | EC_6.1.1.3   | Protein Metabolism                               | Protein biosynthesis                             |
| chiA2 | SMD_2957 | 2,43 | 2,97 | EC_3.2.1.14  | Carbohydrates                                    | Aminosugars                                      |
| pnp   | SMD_2958 | 2,22 | 2,22 | EC_2.7.7.8   | RNA Metabolism                                   | RNA processing and modification                  |
| truB  | SMD_2960 | 2,38 | 2,01 | EC_4.2.1.70  | Cofactors, Vitamins, Prosthetic Groups, Pigments | Riboflavin, FMN, FAD                             |
| truB  | SMD_2960 | 2,38 | 2,01 | EC_4.2.1.70  | RNA Metabolism                                   | RNA processing and modification                  |
| nuoN  | SMD_2967 | 1,98 | 1,91 | EC_1.6.5.3   | Respiration                                      | Electron donating reactions                      |

|      |          |      |                                  |                                      |                                                              |
|------|----------|------|----------------------------------|--------------------------------------|--------------------------------------------------------------|
| nuoM | SMD_2968 | 1,91 | 1,85 EC_1.6.5.3                  | Respiration                          | Electron donating reactions                                  |
| nuoL | SMD_2969 | 1,80 | 1,92 EC_1.6.5.3                  | Respiration                          | Electron donating reactions                                  |
| nuoK | SMD_2970 | 1,92 | 2,09 EC_1.6.5.3                  | Respiration                          | Electron donating reactions                                  |
| nuoJ | SMD_2971 | 2,12 | 2,08 EC_1.6.5.3                  | Respiration                          | Electron donating reactions                                  |
| nuoI | SMD_2972 | 1,99 | 1,66 EC_1.6.5.3                  | Respiration                          | Electron donating reactions                                  |
| nuoH | SMD_2973 | 2,06 | 2,00 EC_1.6.5.3                  | Respiration                          | Electron donating reactions                                  |
| nuoG | SMD_2974 | 2,02 | 2,05 EC_1.6.5.3                  | Respiration                          | Electron donating reactions                                  |
| nuoF | SMD_2975 | 2,01 | 1,91 EC_1.6.5.3                  | Respiration                          | Electron donating reactions                                  |
| nuoE | SMD_2976 | 1,97 | 1,83 EC_1.6.5.3                  | Respiration                          | Electron donating reactions                                  |
| nuoD | SMD_2977 | 2,19 | 2,29 EC_1.6.5.3                  | Respiration                          | Electron donating reactions                                  |
| nuoC | SMD_2978 | 2,59 | 2,56 EC_1.6.5.3                  | Respiration                          | Electron donating reactions                                  |
| nuoB | SMD_2979 | 2,73 | 2,95 EC_1.6.5.3                  | Respiration                          | Electron donating reactions                                  |
| nuoA | SMD_2980 | 3,35 | 3,58 EC_1.6.5.3                  | Respiration                          | Electron donating reactions                                  |
| tpiA | SMD_2983 | 3,14 | 3,01 EC_5.3.1.1                  | Carbohydrates                        | Central carbohydrate metabolism                              |
| -    | SMD_2985 | 3,35 | 3,80 EC_3.1.6.6                  | Stress Response                      | Osmotic stress                                               |
| glmM | SMD_2988 | 2,46 | 2,66 EC_5.4.2.10                 | Cell Wall and Capsule                | Capsular and extracellular polysacchrides                    |
| glmM | SMD_2988 | 2,46 | 2,66 EC_5.4.2.10                 | Cell Wall and Capsule                | Cell Wall and Capsule                                        |
| accD | SMD_2989 | 2,43 | 2,65 EC_6.4.1.2                  | Fatty Acids, Lipids, and Isoprenoids | Fatty acids                                                  |
| accD | SMD_2989 | 2,43 | 2,65 EC_6.4.1.2                  | Virulence, Disease and Defense       | Bacteriocins, ribosomally synthesized antibacterial peptides |
| trpA | SMD_2990 | 2,15 | 2,78 EC_4.2.1.20                 | Amino Acids and Derivatives          | Aromatic amino acids and derivatives                         |
| trpA | SMD_2990 | 2,15 | 2,78 EC_4.2.1.20                 | Secondary Metabolism                 | Plant Hormones                                               |
| trpB | SMD_2992 | 3,53 | 3,39 EC_4.2.1.20                 | Amino Acids and Derivatives          | Aromatic amino acids and derivatives                         |
| trpB | SMD_2992 | 3,53 | 3,39 EC_4.2.1.20                 | Secondary Metabolism                 | Plant Hormones                                               |
| truA | SMD_3000 | 2,29 | 2,40 EC_4.2.1.70                 | RNA Metabolism                       | RNA processing and modification                              |
| truA | SMD_3000 | 2,29 | 2,40 EC_4.2.1.70                 | Virulence, Disease and Defense       | Bacteriocins, ribosomally synthesized antibacterial peptides |
| asd  | SMD_3003 | 2,80 | 2,46 EC_1.2.1.11                 | Amino Acids and Derivatives          | Lysine, threonine, methionine, and cysteine                  |
| -    | SMD_3004 | 2,69 | 2,72 EC_1.1.1.215                | Carbohydrates                        | Monosaccharides                                              |
| -    | SMD_3004 | 2,69 | 2,72 EC_1.1.1.26, EC_1.1.1.79, f | Carbohydrates                        | Central carbohydrate metabolism                              |
| -    | SMD_3004 | 2,69 | 2,72 EC_1.1.1.81                 | Carbohydrates                        | Organic acids                                                |
| aroC | SMD_3005 | 2,58 | 3,18 EC_4.2.3.5                  | Amino Acids and Derivatives          | Aromatic amino acids and derivatives                         |
| psd  | SMD_3008 | 2,48 | 2,81 EC_4.1.1.65                 | Fatty Acids, Lipids, and Isoprenoids | Phospholipids                                                |
| mltD | SMD_3010 | 2,53 | 2,80 EC_3.2.1.-                  | Cell Wall and Capsule                | Cell Wall and Capsule                                        |
| dcd  | SMD_3025 | 3,05 | 3,16 EC_3.5.4.13                 | Nucleosides and Nucleotides          | Pyrimidines                                                  |
| slyD | SMD_3040 | 2,44 | 2,43 EC_5.2.1.8                  | Potassium metabolism                 | Potassium metabolism                                         |
| slyD | SMD_3040 | 2,44 | 2,43 EC_5.2.1.8                  | Protein Metabolism                   | Protein folding                                              |
| slyD | SMD_3040 | 2,44 | 2,43 EC_5.2.1.8                  | Protein Metabolism                   | Protein processing and modification                          |
| phoA | SMD_3044 | 2,31 | 2,51 EC_3.1.3.1                  | Phosphorus Metabolism                | Phosphorus Metabolism                                        |

|      |          |      |      |                          |                                                  |                                                     |
|------|----------|------|------|--------------------------|--------------------------------------------------|-----------------------------------------------------|
| xseB | SMD_3047 | 2,98 | 4,38 | EC_3.1.11.6              | DNA Metabolism                                   | DNA repair                                          |
| ispA | SMD_3048 | 2,98 | 3,67 | EC_2.5.1.1, EC_2.5.1.10  | Fatty Acids, Lipids, and Isoprenoids             | Isoprenoids                                         |
| rnG  | SMD_3054 | 2,66 | 3,63 | EC_3.1.4.-               | RNA Metabolism                                   | RNA processing and modification                     |
| nadD | SMD_3063 | 1,80 | 2,57 | EC_2.7.7.18              | Cofactors, Vitamins, Prosthetic Groups, Pigments | NAD and NADP                                        |
| leuS | SMD_3066 | 2,86 | 3,08 | EC_6.1.1.4               | Protein Metabolism                               | Protein biosynthesis                                |
| metG | SMD_3080 | 2,47 | 2,83 | EC_6.1.1.10              | Miscellaneous                                    | Plant-Prokaryote DOE project                        |
| metG | SMD_3080 | 2,47 | 2,83 | EC_6.1.1.10              | Protein Metabolism                               | Protein biosynthesis                                |
| -    | SMD_3081 | 3,02 | 2,66 | EC_3.1.3.3               | Amino Acids and Derivatives                      | Alanine, serine, and glycine                        |
| vdh  | SMD_3104 | 3,24 | 2,75 | EC_1.4.1.9               | Amino Acids and Derivatives                      | Branched-chain amino acids                          |
| -    | SMD_3106 | 2,94 | 2,51 | EC_2.3.1.16              | Amino Acids and Derivatives                      | Branched-chain amino acids                          |
| -    | SMD_3106 | 2,94 | 2,51 | EC_2.3.1.16, EC_2.3.1.9  | Carbohydrates                                    | One-carbon Metabolism                               |
| -    | SMD_3106 | 2,94 | 2,51 | EC_2.3.1.9               | Carbohydrates                                    | Fermentation                                        |
| -    | SMD_3106 | 2,94 | 2,51 | EC_2.3.1.16              | Cofactors, Vitamins, Prosthetic Groups, Pigments | Biotin                                              |
| -    | SMD_3106 | 2,94 | 2,51 | EC_2.3.1.16, EC_2.3.1.9  | Fatty Acids, Lipids, and Isoprenoids             | Fatty Acids, Lipids, and Isoprenoids                |
| -    | SMD_3106 | 2,94 | 2,51 | EC_2.3.1.9               | Fatty Acids, Lipids, and Isoprenoids             | Isoprenoids                                         |
| mtaP | SMD_3117 | 2,88 | 2,63 | EC_2.4.2.28              | Amino Acids and Derivatives                      | Lysine, threonine, methionine, and cysteine         |
| hpt  | SMD_3118 | 2,40 | 2,51 | EC_2.4.2.8               | Cofactors, Vitamins, Prosthetic Groups, Pigments | Folate and pterines                                 |
| hpt  | SMD_3118 | 2,40 | 2,51 | EC_2.4.2.8               | Nucleosides and Nucleotides                      | Purines                                             |
| rumA | SMD_3122 | 2,91 | 3,47 | EC_2.1.1.-               | Regulation and Cell signaling                    | Regulation of virulence                             |
| rumA | SMD_3122 | 2,91 | 3,47 | EC_2.1.1.-               | RNA Metabolism                                   | RNA processing and modification                     |
| rnc  | SMD_3126 | 2,24 | 2,13 | EC_3.1.26.3              | RNA Metabolism                                   | RNA processing and modification                     |
| lepB | SMD_3128 | 2,07 | 2,61 | EC_3.4.21.89             | Protein Metabolism                               | Protein processing and modification                 |
| -    | SMD_3133 | 2,96 | 3,51 | EC_1.1.1.35, EC_4.2.1.17 | Amino Acids and Derivatives                      | Branched-chain amino acids                          |
| -    | SMD_3133 | 2,96 | 3,51 | EC_1.1.1.35, EC_5.1.2.3  | Carbohydrates                                    | Fermentation                                        |
| -    | SMD_3133 | 2,96 | 3,51 | EC_1.1.1.35              | Fatty Acids, Lipids, and Isoprenoids             | Fatty acids                                         |
| -    | SMD_3133 | 2,96 | 3,51 | EC_4.2.1.17, EC_5.1.2.3  | Fatty Acids, Lipids, and Isoprenoids             | Fatty Acids, Lipids, and Isoprenoids                |
| gcvP | SMD_3153 | 2,73 | 2,47 | EC_1.4.4.2               | Amino Acids and Derivatives                      | Alanine, serine, and glycine                        |
| purA | SMD_3164 | 3,36 | 3,56 | EC_6.3.4.4               | Nucleosides and Nucleotides                      | Purines                                             |
| pbpC | SMD_3174 | 2,13 | 2,51 | EC_2.4.2.-               | Cell Wall and Capsule                            | Cell Wall and Capsule                               |
| prpD | SMD_3176 | 3,32 | 3,30 | EC_4.2.1.79              | Carbohydrates                                    | Organic acids                                       |
| acnA | SMD_3180 | 2,13 | 2,26 | EC_4.2.1.79              | Carbohydrates                                    | Organic acids                                       |
| prpC | SMD_3181 | 2,62 | 2,60 | EC_2.3.3.5               | Carbohydrates                                    | Organic acids                                       |
| prpB | SMD_3182 | 2,47 | 1,88 | EC_4.1.3.30              | Carbohydrates                                    | Organic acids                                       |
| aroB | SMD_3189 | 2,81 | 3,23 | EC_4.2.3.4               | Amino Acids and Derivatives                      | Aromatic amino acids and derivatives                |
| aroB | SMD_3189 | 2,81 | 3,23 | EC_4.2.3.4               | Membrane Transport                               | Protein and nucleoprotein secretion system, Type IV |
| hemE | SMD_3191 | 3,20 | 3,56 | EC_4.1.1.37              | Cofactors, Vitamins, Prosthetic Groups, Pigments | Tetrapyrroles                                       |
| -    | SMD_3220 | 3,44 | 4,13 | EC_3.5.2.6               | Virulence, Disease and Defense                   | Resistance to antibiotics and toxic compounds       |

|      |          |      |                   |                                                  |                                                     |
|------|----------|------|-------------------|--------------------------------------------------|-----------------------------------------------------|
| gcvT | SMD_3225 | 2,47 | 2,70 EC_2.1.2.10  | Amino Acids and Derivatives                      | Alanine, serine, and glycine                        |
| nudE | SMD_3230 | 2,32 | 3,10 EC_3.6.1.-   | Nucleosides and Nucleotides                      | Detoxification                                      |
| bioA | SMD_3231 | 2,88 | 2,74 EC_2.6.1.62  | Cofactors, Vitamins, Prosthetic Groups, Pigments | Biotin                                              |
| rsmE | SMD_3232 | 2,57 | 2,76 EC_2.1.1.-   | RNA Metabolism                                   | RNA processing and modification                     |
| rsmE | SMD_3232 | 2,57 | 2,76 EC_2.1.1.-   | Stress Response                                  | Oxidative stress                                    |
| rsmE | SMD_3232 | 2,57 | 2,76 EC_2.1.1.-   | Stress Response                                  | Heat shock                                          |
| gshB | SMD_3242 | 3,80 | 4,67 EC_6.3.2.3   | Stress Response                                  | Oxidative stress                                    |
| gshB | SMD_3242 | 3,80 | 4,67 EC_6.3.2.3   | Stress Response                                  | Heat shock                                          |
| mrcB | SMD_3248 | 2,89 | 3,12 EC_2.4.1.129 | Cell Wall and Capsule                            | Cell Wall and Capsule                               |
| mrcB | SMD_3248 | 2,89 | 3,12 EC_2.4.1.129 | Membrane Transport                               | Protein and nucleoprotein secretion system, Type IV |
| relA | SMD_3251 | 3,03 | 2,96 EC_2.7.6.5   | Regulation and Cell signaling                    | Regulation of virulence                             |
| -    | SMD_3254 | 3,59 | 3,98 EC_1.16.3.1  | Stress Response                                  | Oxidative stress                                    |
| ruvC | SMD_3318 | 2,68 | 2,39 EC_3.1.22.4  | DNA Metabolism                                   | DNA recombination                                   |
| aspS | SMD_3323 | 2,89 | 3,15 EC_6.1.1.12  | Protein Metabolism                               | Protein biosynthesis                                |
| otsA | SMD_3346 | 2,87 | 3,46 EC_2.4.1.15  | Carbohydrates                                    | Di- and oligosaccharides                            |
| rluD | SMD_3350 | 2,52 | 2,50 EC_4.2.1.70  | Protein Metabolism                               | Protein biosynthesis                                |
| rluD | SMD_3350 | 2,52 | 2,50 EC_4.2.1.70  | RNA Metabolism                                   | RNA processing and modification                     |
| nadE | SMD_3353 | 2,85 | 3,02 EC_6.3.1.5   | Cofactors, Vitamins, Prosthetic Groups, Pigments | NAD and NADP                                        |
| sucD | SMD_3354 | 1,94 | 1,94 EC_6.2.1.5   | Carbohydrates                                    | Central carbohydrate metabolism                     |
| sucD | SMD_3354 | 1,94 | 1,94 EC_6.2.1.5   | Carbohydrates                                    | One-carbon Metabolism                               |
| sucC | SMD_3355 | 1,95 | 1,92 EC_6.2.1.5   | Carbohydrates                                    | Central carbohydrate metabolism                     |
| sucC | SMD_3355 | 1,95 | 1,92 EC_6.2.1.5   | Carbohydrates                                    | One-carbon Metabolism                               |
| coaE | SMD_3362 | 2,77 | 4,14 EC_2.7.1.24  | Cofactors, Vitamins, Prosthetic Groups, Pigments | Coenzyme A                                          |
| trmB | SMD_3379 | 2,37 | 3,37 EC_2.1.1.33  | RNA Metabolism                                   | RNA processing and modification                     |
| alf1 | SMD_3400 | 2,55 | 2,44 EC_4.1.2.13  | Carbohydrates                                    | Central carbohydrate metabolism                     |
| pykA | SMD_3401 | 3,12 | 3,14 EC_2.7.1.40  | Carbohydrates                                    | Central carbohydrate metabolism                     |
| pykA | SMD_3401 | 3,12 | 3,14 EC_2.7.1.40  | Carbohydrates                                    | Organic acids                                       |
| pgk  | SMD_3403 | 2,33 | 2,92 EC_2.7.2.3   | Carbohydrates                                    | Central carbohydrate metabolism                     |
| gap  | SMD_3406 | 2,52 | 2,96 EC_1.2.1.12  | Carbohydrates                                    | Central carbohydrate metabolism                     |
| gap  | SMD_3406 | 2,52 | 2,96 EC_1.2.1.12  | Cofactors, Vitamins, Prosthetic Groups, Pigments | Pyridoxine                                          |
| gap  | SMD_3406 | 2,52 | 2,96 EC_1.2.1.12  | Stress Response                                  | Oxidative stress                                    |
| tktA | SMD_3416 | 2,36 | 2,52 EC_2.2.1.1   | Carbohydrates                                    | Central carbohydrate metabolism                     |
| mrcA | SMD_3429 | 3,08 | 3,81 EC_2.4.1.129 | Cell Wall and Capsule                            | Cell Wall and Capsule                               |
| mrcA | SMD_3429 | 3,08 | 3,81 EC_2.4.1.129 | Membrane Transport                               | Protein and nucleoprotein secretion system, Type IV |
| gltA | SMD_3438 | 2,18 | 2,10 EC_2.3.3.1   | Carbohydrates                                    | Central carbohydrate metabolism                     |
| gltA | SMD_3438 | 2,18 | 2,10 EC_2.3.3.1   | Carbohydrates                                    | One-carbon Metabolism                               |
| iunH | SMD_3440 | 2,74 | 2,90 EC_3.2.2.1   | Nucleosides and Nucleotides                      | Purines                                             |

|       |          |      |      |             |                                                  |                                                  |
|-------|----------|------|------|-------------|--------------------------------------------------|--------------------------------------------------|
| iunH  | SMD_3440 | 2,74 | 2,90 | EC_3.2.2.1  | RNA Metabolism                                   | RNA processing and modification                  |
| rpoZ  | SMD_3444 | 3,58 | 4,22 | EC_2.7.7.6  | RNA Metabolism                                   | Transcription                                    |
| gmk   | SMD_3445 | 3,37 | 3,25 | EC_2.7.4.8  | Nucleosides and Nucleotides                      | Purines                                          |
| fdnG  | SMD_3446 | 5,60 | 5,59 | EC_1.2.1.2  | Respiration                                      | Electron donating reactions                      |
| fdnG  | SMD_3446 | 5,60 | 5,59 | EC_1.2.1.2  | Respiration                                      | Respiration                                      |
| selA  | SMD_3450 | 4,09 | 3,53 | EC_2.9.1.1  | Protein Metabolism                               | Selenoproteins                                   |
| selD  | SMD_3453 | 4,54 | 5,20 | EC_2.7.9.3  | Protein Metabolism                               | Selenoproteins                                   |
| selD  | SMD_3453 | 4,54 | 5,20 | EC_2.7.9.3  | RNA Metabolism                                   | RNA processing and modification                  |
| rph   | SMD_3455 | 2,52 | 3,10 | EC_2.7.7.56 | RNA Metabolism                                   | RNA processing and modification                  |
| rph   | SMD_3455 | 2,52 | 3,10 | EC_2.7.7.56 | Stress Response                                  | Heat shock                                       |
| -     | SMD_3457 | 2,89 | 2,89 | EC_3.6.1.15 | Nucleosides and Nucleotides                      | Detoxification                                   |
| -     | SMD_3457 | 2,89 | 2,89 | EC_3.6.1.15 | Stress Response                                  | Heat shock                                       |
| pepQ  | SMD_3461 | 2,96 | 2,74 | EC_3.4.13.9 | Protein Metabolism                               | Protein degradation                              |
| rpiA  | SMD_3469 | 2,14 | 2,22 | EC_5.3.1.6  | Carbohydrates                                    | Central carbohydrate metabolism                  |
| rpiA  | SMD_3469 | 2,14 | 2,22 | EC_5.3.1.6  | Carbohydrates                                    | Monosaccharides                                  |
| thiE  | SMD_3473 | 2,72 | 2,63 | EC_2.5.1.3  | Cofactors, Vitamins, Prosthetic Groups, Pigments | Cofactors, Vitamins, Prosthetic Groups, Pigments |
| thiE  | SMD_3473 | 2,72 | 2,63 | EC_2.5.1.3  | Cofactors, Vitamins, Prosthetic Groups, Pigments | Folate and pterines                              |
| hemL  | SMD_3474 | 2,90 | 2,92 | EC_5.4.3.8  | Cofactors, Vitamins, Prosthetic Groups, Pigments | Tetrapyrroles                                    |
| mpl   | SMD_3488 | 3,26 | 3,18 | EC_6.3.2.-  | Cell Wall and Capsule                            | Cell Wall and Capsule                            |
| adk   | SMD_3489 | 2,47 | 2,43 | EC_2.7.4.3  | Nucleosides and Nucleotides                      | Purines                                          |
| pfk   | SMD_3490 | 3,77 | 3,17 | EC_2.7.1.11 | Carbohydrates                                    | Central carbohydrate metabolism                  |
| pfk   | SMD_3490 | 3,77 | 3,17 | EC_2.7.1.11 | Carbohydrates                                    | Aminosugars                                      |
| ppa   | SMD_3505 | 2,49 | 2,30 | EC_3.6.1.1  | Phosphorus Metabolism                            | Phosphorus Metabolism                            |
| -     | SMD_3514 | 3,65 | 3,94 | EC_2.3.2.2  | Stress Response                                  | Oxidative stress                                 |
| -     | SMD_3516 | 2,62 | 2,52 | EC_1.1.1.86 | Amino Acids and Derivatives                      | Branched-chain amino acids                       |
| -     | SMD_3516 | 2,62 | 2,52 | EC_1.1.1.86 | Cofactors, Vitamins, Prosthetic Groups, Pigments | Coenzyme A                                       |
| leuA  | SMD_3520 | 3,50 | 2,46 | EC_2.3.3.13 | Amino Acids and Derivatives                      | Branched-chain amino acids                       |
| leuC  | SMD_3522 | 2,59 | 2,89 | EC_4.2.1.33 | Amino Acids and Derivatives                      | Branched-chain amino acids                       |
| leuD  | SMD_3523 | 1,77 | 1,43 | EC_4.2.1.33 | Amino Acids and Derivatives                      | Branched-chain amino acids                       |
| leuB  | SMD_3524 | 2,21 | 2,40 | EC_1.1.1.85 | Amino Acids and Derivatives                      | Branched-chain amino acids                       |
| pcm2  | SMD_3530 | 2,59 | 3,15 | EC_2.1.1.77 | Membrane Transport                               | Membrane Transport                               |
| pcm2  | SMD_3530 | 2,59 | 3,15 | EC_2.1.1.77 | Protein Metabolism                               | Protein processing and modification              |
| pcm2  | SMD_3530 | 2,59 | 3,15 | EC_2.1.1.77 | Secondary Metabolism                             | Secondary Metabolism                             |
| kdtA  | SMD_3533 | 3,15 | 4,96 | EC_2.-.-.-  | Cell Wall and Capsule                            | Gram-Negative cell wall components               |
| htrB  | SMD_3534 | 3,69 | 3,72 | EC_2.3.1.-  | Cell Wall and Capsule                            | Gram-Negative cell wall components               |
| maeB  | SMD_3541 | 2,55 | 2,70 | EC_1.1.1.40 | Carbohydrates                                    | Central carbohydrate metabolism                  |
| fabG3 | SMD_3551 | 1,63 | 2,31 | EC_1.1.1.36 | Carbohydrates                                    | One-carbon Metabolism                            |

|       |          |      |      |                           |                                                  |                                             |
|-------|----------|------|------|---------------------------|--------------------------------------------------|---------------------------------------------|
| fabG3 | SMD_3551 | 1,63 | 2,31 | EC_1.1.1.36               | Carbohydrates                                    | Fermentation                                |
| fabG3 | SMD_3551 | 1,63 | 2,31 | EC_1.1.1.36               | Fatty Acids, Lipids, and Isoprenoids             | Fatty Acids, Lipids, and Isoprenoids        |
| -     | SMD_3555 | 3,62 | 4,09 | EC_2.6.1.1                | Amino Acids and Derivatives                      | Lysine, threonine, methionine, and cysteine |
| amn   | SMD_3561 | 3,19 | 4,05 | EC_3.2.2.4                | Nucleosides and Nucleotides                      | Purines                                     |
| -     | SMD_3575 | 2,94 | 2,65 | EC_3.1.2.12               | Stress Response                                  | Detoxification                              |
| adhC  | SMD_3577 | 3,10 | 2,60 | EC_1.1.1.284              | Stress Response                                  | Detoxification                              |
| -     | SMD_3586 | 2,45 | 2,06 | EC_1.1.1.1                | Carbohydrates                                    | Fermentation                                |
| -     | SMD_3586 | 2,45 | 2,06 | EC_1.1.1.1                | Cofactors, Vitamins, Prosthetic Groups, Pigments | Folate and pterines                         |
| -     | SMD_3586 | 2,45 | 2,06 | EC_1.1.1.1                | Fatty Acids, Lipids, and Isoprenoids             | Phospholipids                               |
| -     | SMD_3587 | 2,89 | 4,05 | EC_6.3.2.2                | Stress Response                                  | Oxidative stress                            |
| -     | SMD_3603 | 3,59 | 4,00 | EC_3.2.1.-                | Cell Wall and Capsule                            | Cell Wall and Capsule                       |
| nagA  | SMD_3612 | 2,15 | 2,20 | EC_3.5.1.25               | Carbohydrates                                    | Aminosugars                                 |
| nagA  | SMD_3612 | 2,15 | 2,20 | EC_3.5.1.25               | Cell Wall and Capsule                            | Capsular and extracellular polysacchrides   |
| -     | SMD_3613 | 2,62 | 2,20 | EC_3.5.99.6               | Carbohydrates                                    | Aminosugars                                 |
| nahB  | SMD_3618 | 3,45 | 3,42 | EC_3.2.1.52               | Carbohydrates                                    | Aminosugars                                 |
| -     | SMD_3622 | 3,64 | 4,06 | EC_2.7.6.3                | Cofactors, Vitamins, Prosthetic Groups, Pigments | Folate and pterines                         |
| -     | SMD_3630 | 2,62 | 2,74 | EC_1.1.1.44               | Carbohydrates                                    | Central carbohydrate metabolism             |
| -     | SMD_3630 | 2,62 | 2,74 | EC_1.1.1.44               | Carbohydrates                                    | Monosaccharides                             |
| dacC  | SMD_3638 | 2,39 | 2,30 | EC_3.4.16.4               | Cell Wall and Capsule                            | Cell Wall and Capsule                       |
| dacC  | SMD_3638 | 2,39 | 2,30 | EC_3.4.16.4               | Protein Metabolism                               | Protein degradation                         |
| mltB  | SMD_3640 | 3,42 | 4,36 | EC_3.2.1.-                | Cell Wall and Capsule                            | Cell Wall and Capsule                       |
| ubiE  | SMD_3651 | 3,67 | 3,38 | EC_2.1.1.-                | Cofactors, Vitamins, Prosthetic Groups, Pigments | Quinone cofactors                           |
| codA  | SMD_3652 | 3,19 | 2,83 | EC_3.5.4.1                | Amino Acids and Derivatives                      | Amino Acids and Derivatives                 |
| codA  | SMD_3652 | 3,19 | 2,83 | EC_3.5.4.1                | Nucleosides and Nucleotides                      | Pyrimidines                                 |
| hslV  | SMD_3662 | 2,68 | 2,96 | EC_3.4.25.-               | Protein Metabolism                               | Protein degradation                         |
| dapF  | SMD_3665 | 2,82 | 3,12 | EC_5.1.1.7                | Amino Acids and Derivatives                      | Lysine, threonine, methionine, and cysteine |
| -     | SMD_3669 | 3,26 | 4,11 | EC_2.6.1.1                | Amino Acids and Derivatives                      | Lysine, threonine, methionine, and cysteine |
| prlC  | SMD_3679 | 2,31 | 2,89 | EC_3.4.24.70              | Protein Metabolism                               | Protein degradation                         |
| -     | SMD_3681 | 2,84 | 3,42 | EC_2.5.1.47               | Amino Acids and Derivatives                      | Lysine, threonine, methionine, and cysteine |
| -     | SMD_3682 | 2,58 | 3,21 | EC_4.4.1.5                | Carbohydrates                                    | Central carbohydrate metabolism             |
| -     | SMD_3682 | 2,58 | 3,21 | EC_4.4.1.5                | Stress Response                                  | Oxidative stress                            |
| -     | SMD_3684 | 2,47 | 3,54 | EC_1.1.1.205              | Nucleosides and Nucleotides                      | Purines                                     |
| glmS  | SMD_3685 | 2,74 | 2,58 | EC_2.6.1.16               | Cell Wall and Capsule                            | Capsular and extracellular polysacchrides   |
| glmS  | SMD_3685 | 2,74 | 2,58 | EC_2.6.1.16               | Cell Wall and Capsule                            | Cell Wall and Capsule                       |
| glmU  | SMD_3694 | 2,37 | 3,24 | EC_2.3.1.157, EC_2.7.7.23 | Cell Wall and Capsule                            | Capsular and extracellular polysacchrides   |
| glmU  | SMD_3694 | 2,37 | 3,24 | EC_2.3.1.157, EC_2.7.7.23 | Cell Wall and Capsule                            | Cell Wall and Capsule                       |
| lpdA  | SMD_3708 | 2,40 | 2,54 | EC_1.8.1.4                | Carbohydrates                                    | Central carbohydrate metabolism             |

|       |          |      |                               |                                                  |                                                          |
|-------|----------|------|-------------------------------|--------------------------------------------------|----------------------------------------------------------|
| DLAT  | SMD_3709 | 2,81 | 2,64 EC_2.3.1.12              | Carbohydrates                                    | Central carbohydrate metabolism                          |
| DLAT  | SMD_3709 | 2,81 | 2,64 EC_2.3.1.12              | Cofactors, Vitamins, Prosthetic Groups, Pigments | Folate and pterines                                      |
| hemC  | SMD_3718 | 4,76 | 4,89 EC_2.5.1.61              | Cofactors, Vitamins, Prosthetic Groups, Pigments | Tetrapyrroles                                            |
| -     | SMD_3722 | 3,59 | 4,27 EC_2.4.1.-               | Stress Response                                  | Osmotic stress                                           |
| gst5  | SMD_3746 | 2,97 | 3,74 EC_2.5.1.18              | Stress Response                                  | Oxidative stress                                         |
| ribA  | SMD_3768 | 3,01 | 3,37 EC_3.5.4.25              | Cofactors, Vitamins, Prosthetic Groups, Pigments | Riboflavin, FMN, FAD                                     |
| ribA  | SMD_3768 | 3,01 | 3,37 EC_3.5.4.25              | Cofactors, Vitamins, Prosthetic Groups, Pigments | Folate and pterines                                      |
| def   | SMD_3777 | 3,56 | 2,68 EC_3.5.1.88              | Protein Metabolism                               | Protein biosynthesis                                     |
| topA  | SMD_3783 | 2,47 | 3,06 EC_5.99.1.2              | DNA Metabolism                                   | DNA replication                                          |
| aroG  | SMD_3803 | 4,69 | 5,29 EC_2.5.1.54              | Amino Acids and Derivatives                      | Aromatic amino acids and derivatives                     |
| -     | SMD_3817 | 2,61 | 3,84 EC_1.8.1.8               | Protein Metabolism                               | Protein folding                                          |
| -     | SMD_3817 | 2,61 | 3,84 EC_1.8.1.8               | Respiration                                      | Respiration                                              |
| -     | SMD_3826 | 6,44 | 5,96 EC_3.4.16.4              | Cell Wall and Capsule                            | Cell Wall and Capsule                                    |
| -     | SMD_3826 | 6,44 | 5,96 EC_3.4.16.4              | Protein Metabolism                               | Protein degradation                                      |
| aroQ  | SMD_3832 | 2,54 | 3,89 EC_4.2.1.10              | Amino Acids and Derivatives                      | Aromatic amino acids and derivatives                     |
| aroQ  | SMD_3832 | 2,54 | 3,89 EC_4.2.1.10              | Metabolism of Aromatic Compounds                 | Peripheral pathways for catabolism of aromatic compounds |
| accC  | SMD_3835 | 1,94 | 2,02 EC_6.3.4.14              | Fatty Acids, Lipids, and Isoprenoids             | Fatty acids                                              |
| prmA  | SMD_3838 | 3,20 | 4,03 EC_2.1.1.-               | Protein Metabolism                               | Protein biosynthesis                                     |
| prmA  | SMD_3838 | 3,20 | 4,03 EC_2.1.1.-               | Stress Response                                  | Heat shock                                               |
| cdsA2 | SMD_3841 | 2,28 | 4,47 EC_2.7.7.41              | Fatty Acids, Lipids, and Isoprenoids             | Phospholipids                                            |
| -     | SMD_3842 | 2,72 | 3,07 EC_2.3.1.51              | Fatty Acids, Lipids, and Isoprenoids             | Phospholipids                                            |
| purH  | SMD_3847 | 2,86 | 3,22 EC_2.1.2.3               | Cofactors, Vitamins, Prosthetic Groups, Pigments | Folate and pterines                                      |
| purH  | SMD_3847 | 2,86 | 3,22 EC_2.1.2.3, EC_3.5.4.10  | Nucleosides and Nucleotides                      | Purines                                                  |
| icd   | SMD_3868 | 2,89 | 2,75 EC_1.1.1.42              | Carbohydrates                                    | Central carbohydrate metabolism                          |
| icd   | SMD_3868 | 2,89 | 2,75 EC_1.1.1.42              | Cofactors, Vitamins, Prosthetic Groups, Pigments | Folate and pterines                                      |
| aas   | SMD_3878 | 3,48 | 3,95 EC_2.3.1.51              | Fatty Acids, Lipids, and Isoprenoids             | Phospholipids                                            |
| nudC  | SMD_3883 | 2,76 | 4,34 EC_3.6.1.22              | Nucleosides and Nucleotides                      | Detoxification                                           |
| nudH  | SMD_3892 | 3,11 | 3,43 EC_3.6.1.-               | Miscellaneous                                    | Miscellaneous                                            |
| nudH  | SMD_3892 | 3,11 | 3,43 EC_3.6.1.-               | Nucleosides and Nucleotides                      | Detoxification                                           |
| -     | SMD_3897 | 3,32 | 3,20 EC_1.14.13.-             | Cofactors, Vitamins, Prosthetic Groups, Pigments | Quinone cofactors                                        |
| trpC  | SMD_3903 | 3,25 | 3,39 EC_4.1.1.48              | Amino Acids and Derivatives                      | Aromatic amino acids and derivatives                     |
| trpD  | SMD_3904 | 2,95 | 2,66 EC_2.4.2.18              | Amino Acids and Derivatives                      | Aromatic amino acids and derivatives                     |
| trpD  | SMD_3904 | 2,95 | 2,66 EC_2.4.2.18              | Secondary Metabolism                             | Plant Hormones                                           |
| pabA  | SMD_3905 | 2,98 | 3,45 EC_2.6.1.85, EC_4.1.3.27 | Amino Acids and Derivatives                      | Aromatic amino acids and derivatives                     |
| pabA  | SMD_3905 | 2,98 | 3,45 EC_2.6.1.85              | Cofactors, Vitamins, Prosthetic Groups, Pigments | Folate and pterines                                      |
| trpE  | SMD_3907 | 4,46 | 6,54 EC_4.1.3.27              | Amino Acids and Derivatives                      | Aromatic amino acids and derivatives                     |
| rpe   | SMD_3910 | 2,46 | 1,91 EC_5.1.3.1               | Carbohydrates                                    | Central carbohydrate metabolism                          |

|       |          |      |      |               |                                                  |                                              |
|-------|----------|------|------|---------------|--------------------------------------------------|----------------------------------------------|
| purC  | SMD_3912 | 4,62 | 4,58 | EC_6.3.2.6    | Nucleosides and Nucleotides                      | Purines                                      |
| hmgA  | SMD_3923 | 2,13 | 2,56 | EC_1.13.11.5  | Cofactors, Vitamins, Prosthetic Groups, Pigments | Folate and pterines                          |
| hmgA  | SMD_3923 | 2,13 | 2,56 | EC_1.13.11.5  | Metabolism of Aromatic Compounds                 | Metabolism of central aromatic intermediates |
| -     | SMD_3924 | 2,72 | 3,27 | EC_1.13.11.27 | Amino Acids and Derivatives                      | Aromatic amino acids and derivatives         |
| -     | SMD_3924 | 2,72 | 3,27 | EC_1.13.11.27 | Cofactors, Vitamins, Prosthetic Groups, Pigments | Folate and pterines                          |
| -     | SMD_3924 | 2,72 | 3,27 | EC_1.13.11.27 | Metabolism of Aromatic Compounds                 | Metabolism of central aromatic intermediates |
| -     | SMD_3929 | 2,81 | 4,76 | EC_1.13.11.11 | Amino Acids and Derivatives                      | Aromatic amino acids and derivatives         |
| -     | SMD_3929 | 2,81 | 4,76 | EC_1.13.11.11 | Cofactors, Vitamins, Prosthetic Groups, Pigments | NAD and NADP                                 |
| pdhA  | SMD_3930 | 2,31 | 2,50 | EC_1.2.4.4    | Amino Acids and Derivatives                      | Branched-chain amino acids                   |
| pdhA  | SMD_3930 | 2,31 | 2,50 | EC_1.2.4.4    | Carbohydrates                                    | Central carbohydrate metabolism              |
| pdhB  | SMD_3931 | 2,03 | 2,47 | EC_1.2.4.4    | Amino Acids and Derivatives                      | Branched-chain amino acids                   |
| pdhB  | SMD_3931 | 2,03 | 2,47 | EC_1.2.4.4    | Carbohydrates                                    | Central carbohydrate metabolism              |
| -     | SMD_3933 | 2,14 | 1,93 | EC_2.3.1.168  | Amino Acids and Derivatives                      | Branched-chain amino acids                   |
| -     | SMD_3933 | 2,14 | 1,93 | EC_2.3.1.168  | Carbohydrates                                    | Central carbohydrate metabolism              |
| agaS  | SMD_4001 | 3,55 | 1,76 | EC_5.3.1.-    | Carbohydrates                                    | Aminosugars                                  |
| nagA2 | SMD_4005 | 2,27 | 3,97 | EC_3.5.1.25   | Carbohydrates                                    | Aminosugars                                  |
| nagA2 | SMD_4005 | 2,27 | 3,97 | EC_3.5.1.25   | Cell Wall and Capsule                            | Capsular and extracellular polysacchrides    |
| bioF  | SMD_4013 | 3,06 | 3,24 | EC_2.3.1.47   | Cofactors, Vitamins, Prosthetic Groups, Pigments | Biotin                                       |
| -     | SMD_4018 | 4,06 | 3,88 | EC_4.3.1.19   | Amino Acids and Derivatives                      | Lysine, threonine, methionine, and cysteine  |
| -     | SMD_4018 | 4,06 | 3,88 | EC_4.3.1.19   | Amino Acids and Derivatives                      | Branched-chain amino acids                   |
| -     | SMD_4018 | 4,06 | 3,88 | EC_4.3.1.19   | Amino Acids and Derivatives                      | Alanine, serine, and glycine                 |
| -     | SMD_4035 | 2,89 | 2,78 | EC_6.3.1.8    | Stress Response                                  | Oxidative stress                             |
| ilvD  | SMD_4038 | 3,36 | 2,63 | EC_4.2.1.9    | Amino Acids and Derivatives                      | Branched-chain amino acids                   |
| aroE  | SMD_4041 | 3,72 | 2,95 | EC_1.1.1.25   | Amino Acids and Derivatives                      | Aromatic amino acids and derivatives         |
| hemB  | SMD_4044 | 2,72 | 2,20 | EC_4.2.1.24   | Cofactors, Vitamins, Prosthetic Groups, Pigments | Tetrapyrroles                                |
| hemB  | SMD_4044 | 2,72 | 2,20 | EC_4.2.1.24   | Regulation and Cell signaling                    | Regulation and Cell signaling                |
| gst6  | SMD_4051 | 3,97 | 4,04 | EC_2.5.1.18   | Stress Response                                  | Oxidative stress                             |
| -     | SMD_4077 | 7,60 | 8,45 | EC_1.8.1.9    | Nucleosides and Nucleotides                      | Pyrimidines                                  |
| -     | SMD_4077 | 7,60 | 8,45 | EC_1.8.1.9    | Sulfur Metabolism                                | Sulfur Metabolism                            |
| fabF2 | SMD_4090 | 2,11 | 2,20 | EC_2.3.1.41   | Fatty Acids, Lipids, and Isoprenoids             | Fatty acids                                  |
| fabG5 | SMD_4091 | 2,15 | 2,25 | EC_1.1.1.100  | Fatty Acids, Lipids, and Isoprenoids             | Fatty acids                                  |
| -     | SMD_4092 | 1,31 | 2,33 | EC_4.2.1.59   | Fatty Acids, Lipids, and Isoprenoids             | Fatty acids                                  |
| -     | SMD_4093 | 2,34 | 2,29 | EC_2.3.1.41   | Fatty Acids, Lipids, and Isoprenoids             | Fatty acids                                  |
| -     | SMD_4099 | 2,15 | 2,08 | EC_4.3.1.3    | Amino Acids and Derivatives                      | Histidine Metabolism                         |
| -     | SMD_4102 | 2,94 | 2,82 | EC_4.2.1.-    | Fatty Acids, Lipids, and Isoprenoids             | Fatty acids                                  |
| hemF  | SMD_4119 | 3,50 | 3,56 | EC_1.3.3.3    | Cofactors, Vitamins, Prosthetic Groups, Pigments | Tetrapyrroles                                |
| polA  | SMD_4122 | 2,83 | 3,28 | EC_2.7.7.7    | DNA Metabolism                                   | DNA repair                                   |



|       |          |      |                   |                                                  |                                 |
|-------|----------|------|-------------------|--------------------------------------------------|---------------------------------|
| xthA3 | SMD_4151 | 3,26 | 3,38 EC_3.1.11.2  | DNA Metabolism                                   | DNA repair                      |
| acsA  | SMD_4155 | 3,48 | 3,63 EC_6.2.1.1   | Carbohydrates                                    | Central carbohydrate metabolism |
| glyS  | SMD_4166 | 2,54 | 2,92 EC_6.1.1.14  | Protein Metabolism                               | Protein biosynthesis            |
| glyQ  | SMD_4167 | 3,14 | 3,56 EC_6.1.1.14  | Protein Metabolism                               | Protein biosynthesis            |
| -     | SMD_4169 | 3,62 | 4,03 EC_6.3.5.2   | Nucleosides and Nucleotides                      | Purines                         |
| -     | SMD_4193 | 4,03 | 4,30 EC_3.2.1.-   | Cell Wall and Capsule                            | Cell Wall and Capsule           |
| folE  | SMD_4202 | 2,94 | 3,02 EC_3.5.4.16  | Cofactors, Vitamins, Prosthetic Groups, Pigments | Folate and pterines             |
| recD  | SMD_4209 | 2,84 | 2,80 EC_3.1.11.5  | DNA Metabolism                                   | DNA repair                      |
| recB  | SMD_4210 | 2,31 | 2,39 EC_3.1.11.5  | DNA Metabolism                                   | DNA repair                      |
| recC  | SMD_4211 | 2,76 | 3,57 EC_3.1.11.5  | DNA Metabolism                                   | DNA repair                      |
| -     | SMD_4229 | 2,79 | 3,94 EC_3.4.13.19 | Protein Metabolism                               | Protein degradation             |
| glpQ  | SMD_4234 | 4,88 | 6,81 EC_3.1.4.46  | Carbohydrates                                    | Sugar alcohols                  |

**Table S5. Statistical analysis of RNA half-lives of RNAs grouped in functional categories**

|                                                                |                               |                                  |                |
|----------------------------------------------------------------|-------------------------------|----------------------------------|----------------|
| Statistical test                                               | Kruskal-Wallis                |                                  |                |
| P value                                                        | < 0.0001                      |                                  |                |
| Exact or approximate P value?                                  | Gaussian Approximation        |                                  |                |
| P value summary                                                | ***                           |                                  |                |
| Do the medians vary signif. (P < 0.05)                         | Yes                           |                                  |                |
| Number of groups                                               | 13                            |                                  |                |
| Kruskal-Wallis statistic                                       | 62,52                         |                                  |                |
| <b>Dunn's Multiple Comparison Test</b>                         | <b>Difference in rank sum</b> | <b>Significant? P &lt; 0.05?</b> | <b>Summary</b> |
| Virulence disease and defense vs Stress response               | -204,5                        | Yes                              | *              |
| Virulence disease and defense vs RNA metabolism                | -39,04                        | No                               | ns             |
| Virulence disease and defense vs Respiration                   | 68,67                         | No                               | ns             |
| Virulence disease and defense vs Regulation and cell signaling | -116,8                        | No                               | ns             |
| Virulence disease and defense vs Protein metabolism            | -96,14                        | No                               | ns             |
| Virulence disease and defense vs Nucleosides and nucleotides   | -125,1                        | No                               | ns             |
| Virulence disease and defense vs Fatty acids and lipids        | -29,47                        | No                               | ns             |
| Virulence disease and defense vs DNA metabolism                | -92,90                        | No                               | ns             |
| Virulence disease and defense vs Cofactors, vitamins, pigments | -140,1                        | No                               | ns             |
| Virulence disease and defense vs Cell wall and capsule         | -46,68                        | No                               | ns             |
| Virulence disease and defense vs Carbohydrates                 | -30,40                        | No                               | ns             |
| Virulence disease and defense vs Amino acids and derivatives   | -86,75                        | No                               | ns             |
| Stress response vs RNA metabolism                              | 165,4                         | Yes                              | *              |
| Stress response vs Respiration                                 | 273,1                         | Yes                              | ***            |
| Stress response vs Regulation and cell signaling               | 87,70                         | No                               | ns             |
| Stress response vs Protein metabolism                          | 108,3                         | No                               | ns             |
| Stress response vs Nucleosides and nucleotides                 | 79,34                         | No                               | ns             |
| Stress response vs Fatty acids and lipids                      | 175,0                         | Yes                              | **             |
| Stress response vs DNA metabolism                              | 111,6                         | No                               | ns             |
| Stress response vs Cofactors, vitamins, pigments               | 64,36                         | No                               | ns             |
| Stress response vs Cell wall and capsule                       | 157,8                         | Yes                              | *              |
| Stress response vs Carbohydrates                               | 174,1                         | Yes                              | ***            |
| Stress response vs Amino acids and derivatives                 | 117,7                         | No                               | ns             |

|                                                                |        |     |     |
|----------------------------------------------------------------|--------|-----|-----|
| RNA metabolism vs Respiration                                  | 107,7  | No  | ns  |
| RNA metabolism vs Regulation and cell signaling                | -77,71 | No  | ns  |
| RNA metabolism vs Protein metabolism                           | -57,09 | No  | ns  |
| RNA metabolism vs Nucleosides and nucleotides                  | -86,07 | No  | ns  |
| RNA metabolism vs Fatty acids and lipids                       | 9,575  | No  | ns  |
| RNA metabolism vs DNA metabolism                               | -53,86 | No  | ns  |
| RNA metabolism vs Cofactors, vitamins, pigments                | -101,0 | No  | ns  |
| RNA metabolism vs Cell wall and capsule                        | -7,633 | No  | ns  |
| RNA metabolism vs Carbohydrates                                | 8,643  | No  | ns  |
| RNA metabolism vs Amino acids and derivatives                  | -47,71 | No  | ns  |
| Respiration vs Regulation and cell signaling                   | -185,4 | No  | ns  |
| Respiration vs Protein metabolism                              | -164,8 | Yes | **  |
| Respiration vs Nucleosides and nucleotides                     | -193,8 | Yes | *** |
| Respiration vs Fatty acids and lipids                          | -98,14 | No  | ns  |
| Respiration vs DNA metabolism                                  | -161,6 | No  | ns  |
| Respiration vs Cofactors, vitamins, pigments                   | -208,8 | Yes | *** |
| Respiration vs Cell wall and capsule                           | -115,3 | No  | ns  |
| Respiration vs Carbohydrates                                   | -99,07 | No  | ns  |
| Respiration vs Amino acids and derivatives                     | -155,4 | Yes | **  |
| Regulation and cell signaling vs Protein metabolism            | 20,61  | No  | ns  |
| Regulation and cell signaling vs Nucleosides and nucleotides   | -8,361 | No  | ns  |
| Regulation and cell signaling vs Fatty acids and lipids        | 87,28  | No  | ns  |
| Regulation and cell signaling vs DNA metabolism                | 23,85  | No  | ns  |
| Regulation and cell signaling vs Cofactors, vitamins, pigments | -23,34 | No  | ns  |
| Regulation and cell signaling vs Cell wall and capsule         | 70,07  | No  | ns  |
| Regulation and cell signaling vs Carbohydrates                 | 86,35  | No  | ns  |
| Regulation and cell signaling vs Amino acids and derivatives   | 30,00  | No  | ns  |
| Protein metabolism vs Nucleosides and nucleotides              | -28,97 | No  | ns  |
| Protein metabolism vs Fatty acids and lipids                   | 66,67  | No  | ns  |
| Protein metabolism vs DNA metabolism                           | 3,239  | No  | ns  |
| Protein metabolism vs Cofactors, vitamins, pigments            | -43,95 | No  | ns  |
| Protein metabolism vs Cell wall and capsule                    | 49,46  | No  | ns  |
| Protein metabolism vs Carbohydrates                            | 65,74  | No  | ns  |

|                                                              |         |     |    |
|--------------------------------------------------------------|---------|-----|----|
| Protein metabolism vs Amino acids and derivatives            | 9,389   | No  | ns |
| Nucleosides and nucleotides vs Fatty acids and lipids        | 95,64   | No  | ns |
| Nucleosides and nucleotides vs DNA metabolism                | 32,21   | No  | ns |
| Nucleosides and nucleotides vs Cofactors, vitamins, pigments | -14,98  | No  | ns |
| Nucleosides and nucleotides vs Cell wall and capsule         | 78,44   | No  | ns |
| Nucleosides and nucleotides vs Carbohydrates                 | 94,71   | No  | ns |
| Nucleosides and nucleotides vs Amino acids and derivatives   | 38,36   | No  | ns |
| Fatty acids and lipids vs DNA metabolism                     | -63,43  | No  | ns |
| Fatty acids and lipids vs Cofactors, vitamins, pigments      | -110,6  | No  | ns |
| Fatty acids and lipids vs Cell wall and capsule              | -17,21  | No  | ns |
| Fatty acids and lipids vs Carbohydrates                      | -0,9322 | No  | ns |
| Fatty acids and lipids vs Amino acids and derivatives        | -57,28  | No  | ns |
| DNA metabolism vs Cofactors, vitamins, pigments              | -47,19  | No  | ns |
| DNA metabolism vs Cell wall and capsule                      | 46,22   | No  | ns |
| DNA metabolism vs Carbohydrates                              | 62,50   | No  | ns |
| DNA metabolism vs Amino acids and derivatives                | 6,150   | No  | ns |
| Cofactors, vitamins, pigments vs Cell wall and capsule       | 93,41   | No  | ns |
| Cofactors, vitamins, pigments vs Carbohydrates               | 109,7   | Yes | ** |
| Cofactors, vitamins, pigments vs Amino acids and derivatives | 53,34   | No  | ns |
| Cell wall and capsule vs Carbohydrates                       | 16,28   | No  | ns |
| Cell wall and capsule vs Amino acids and derivatives         | -40,07  | No  | ns |
| Carbohydrates vs Amino acids and derivatives                 | -56,35  | No  | ns |

---

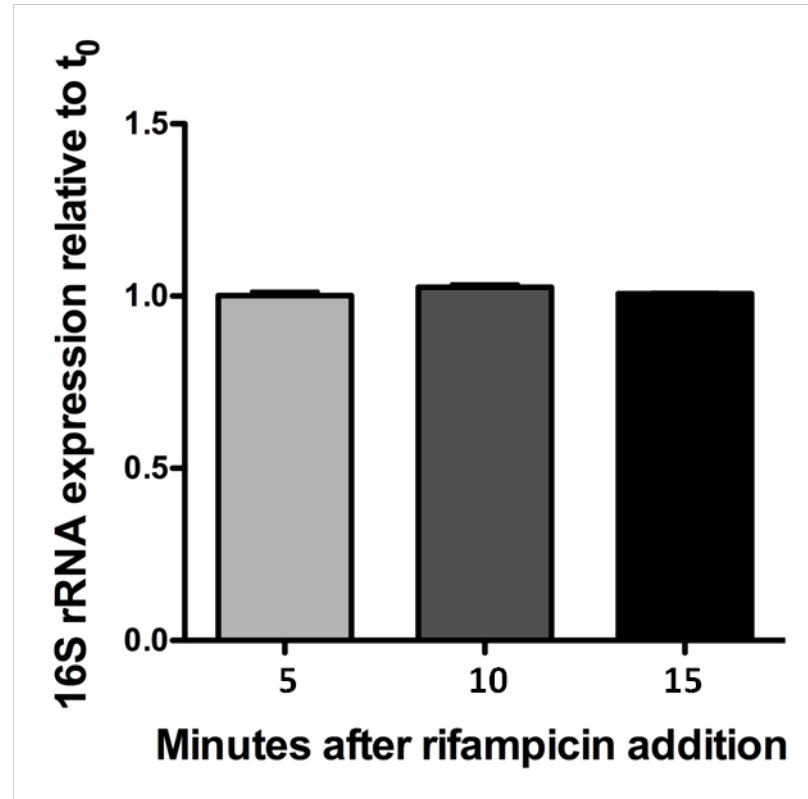

Figure S1. Expression of 16S rRNA at 5, 10 and 15 minutes after transcriptional arrest by rifampicin, relative to 16S rRNA expression at t(0) (time point of rifampicin addition). 16S rRNA expression was measured in *S. maltophilia* D457 by RT-qPCR in 2 replicate RNA decay series of rifampicin addition, using a constant amount of RNA.

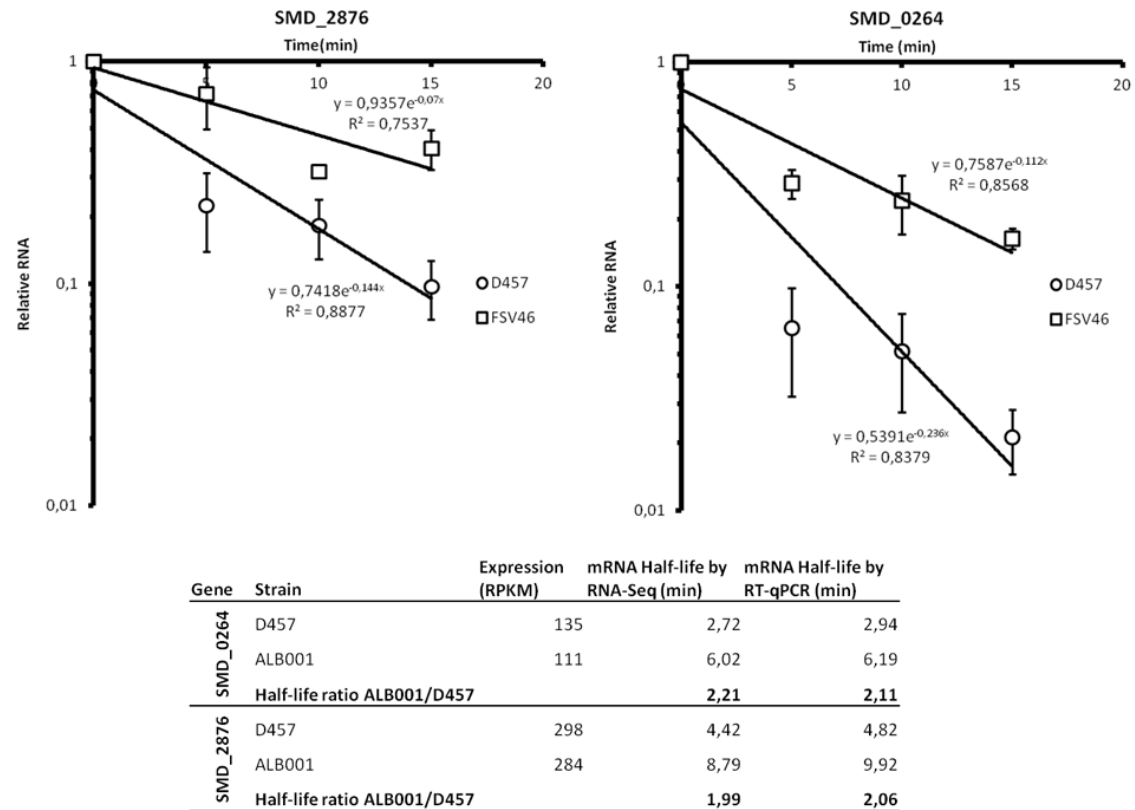

**Figure S2. RT-qPCR verifies that SMD\_2876 and SMD\_0264 RNAs have two-fold half-life in *rng*-deficient mutant in comparison to the wild-type strain.** The relative amount of SMD\_2876 and SMD\_0264 mRNAs was measured in *S. maltophilia* D457 and ALB001 by RT-qPCR in 2 replicate RNA decay series of rifampicin addition. Values indicate the decrease of the mRNA levels observed as a function of time after rifampicin addition (time 0); the standard error is shown. Half-life values calculated by both procedures (RNA-Seq and RT-qPCR) are shown.
